# Supplementary material for: Comentarios a unas conferencias
Source: Royal Society of Chemistry journal article supplement (doi:10.1039/d1cc04453b), 1930-01-01
Supplement: d1cc04453b1.pdf [file d1cc04453b1.pdf]

## Supporting Information for

# Chiral Anthranilic Pyrrolidine as Custom-made Amine Catalyst for Enantioselective Michael Reaction of Nitroalkenes with Carbonyl Compounds

Yukari Oka,<sup>†</sup> Seiji Tsuzuki,<sup>‡</sup> and Katsuhiko Moriyama\*<sup>†</sup>

<sup>†</sup>*Department of Chemistry, Graduate School of Science and Soft Molecular Activation Research  
Center, Chiba University, Yayoi-cho 1-33, Inage-ku, Chiba, 263-8522, Japan*

<sup>‡</sup>*Department of Applied Physics, The University of Tokyo, 7-3-1 Hongo, Tokyo, 113-8656, Japan*  
moriyama@faculty.chiba-u.jp

### Table of contents

|                                                                                                                                                                                                          |       |     |
|----------------------------------------------------------------------------------------------------------------------------------------------------------------------------------------------------------|-------|-----|
| 1. General Methods.                                                                                                                                                                                      | ----- | S2  |
| 2. Procedure for Synthesis of Chiral Anthranilic Pyrrolidine Catalyst ( <b>1</b> )                                                                                                                       | ----- | S2  |
| 3. Procedure for Enantioselective Michael Reaction of Nitroalkenes ( <b>2</b> ) with Cyclic Ketones ( <b>3</b> )<br>Using Anthranilic Pyrrolidine Catalyst ( <b>1e</b> ) (Scheme 2 and Scheme 3).        | ----- | S6  |
| 4. Procedure for Enantioselective Michael Reaction of Nitroalkenes ( <b>2</b> ) with Aldehydes ( <b>5</b> ) Using<br>Anthranilic Pyrrolidine Peptide-like Catalyst ( <b>1o</b> ) (Table 2 and Scheme 4). | ----- | S15 |
| 5. Transformation of chiral Michael reaction adduct ( <b>3a</b> ) into $\beta$ -proline derivative ( <b>8a</b> ) (Scheme 7).                                                                             | ----- | S19 |
| 6. DFT Calculation Studies for Transition State of Enantioselective Michael Reaction of<br>Nitroalkenes with Carbonyl compounds Using Chiral Pyrrolidyl Anthranilic Acid Catalyst.                       | ----- | S21 |
| 7. References                                                                                                                                                                                            | ----- | S45 |

8.  $^1\text{H}$  and  $^{13}\text{C}$  NMR Spectra of Materials.

----- S46

9. HPLC Spectra of Materials.

----- S79

**1. General Methods.**  $^1\text{H}$  NMR spectra were measured on a JEOL ECS-400 (400 MHz) spectrometer at ambient temperature. Data were recorded as follows: chemical shift in ppm from internal tetramethylsilane on the  $\delta$  scale, multiplicity (s = singlet; d = doublet; t = triplet; q = quartet; sep = septet; m = multiplet; br = broad), coupling constant (Hz), integration, and assignment.  $^{13}\text{C}$  NMR spectra were measured on a JEOL ECS-400 (100 MHz) spectrometer. Chemical shifts were recorded in ppm from the solvent resonance employed as the internal standard (deuteriochloroform at 77.0 ppm). High-resolution mass spectra were recorded by Thermo Fisher Scientific Exactive Orbitrap mass spectrometers. Infrared (IR) spectra were recorded on a JASCO FT/IR 4100 spectrometer. Single crystal X-ray diffraction data were collected at 173K on a Bruker SMART APEX II ultra CCD diffractometer with Cu  $K\alpha$  ( $\lambda = 1.54178$ ) radiation and graphite monochromator. For thin-layer chromatography (TLC) analysis throughout this work, Merck precoated TLC plates (silica gel 60GF254 0.25 mm) were used. The products were purified by neutral column chromatography on silica gel (Kanto Chemical Co., Inc. silica gel 60N, Prod. No. 37560-84; Merck silica gel 60, Prod. No. 1.09385.9929). Visualization was accomplished by UV light (254 nm), anisaldehyde,  $\text{KMnO}_4$ , and phosphomolybdic acid. In experiments that required dry solvents such as DMSO and *i*-PrOH were distilled in prior to use.

**2. Procedure for Synthesis of Chiral Anthranilic Pyrrolidine Catalyst (1).**

< Synthesis of Chiral Anthranilic Pyrrolidine Acid (1e) >

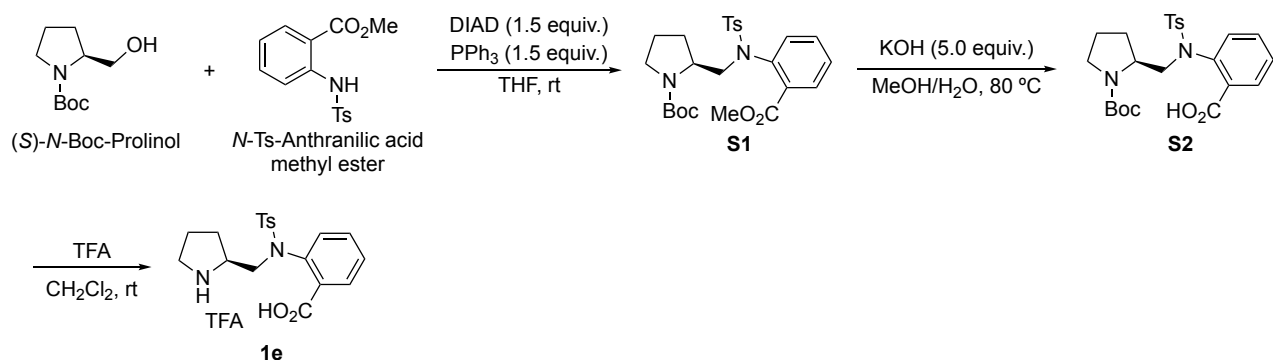

To a solution of *N*-Boc-Prolinol (2.01 g, 10.0 mmol) and *N*-Ts-anthranilic acid methyl ester (3.05 g, 10.0 mmol) and PPh<sub>3</sub> (3.93 g, 15.0 mmol) in THF (50 mL) was added DIAD (in toluene 1.9 M, 7.89 mL, 15.0 mmol) at 0 °C. The reaction mixture was stirred at room temperature for 18 h. The reaction mixture was concentrated reduced pressure, and the crude product was purified by column chromatography (eluent: hexane/AcOEt = 5/1) to give the desired product **S1** (4.86 g, >99% yield).

To a solution of **S1** (4.86 g, 10.0 mmol) in MeOH (25 mL) and H<sub>2</sub>O (25 mL) was added KOH (2.81 g, 50.0 mmol) at room temperature. The reaction mixture was stirred under reflux conditions at 80 °C for 18 h. The reaction mixture was washed with Et<sub>2</sub>O (15 mL×5). The aqueous layer was acidified with 1N HCl aqueous solution until pH to 1. The product was extracted with AcOEt (15 mL × 3). The organic phase was dried over Na<sub>2</sub>SO<sub>4</sub>. The organic phase was concentrated under reduced pressure to give the desired product **S2** (4.72 g, >99% yield).

To a solution of **S2** (1.80 g, 3.79 mmol) in CH<sub>2</sub>Cl<sub>2</sub> (38 mL) was added TFA (11 mL) at room temperature. The reaction mixture was stirred room temperature for 15 h. The volatile solvents were removed under reduced pressure. Et<sub>2</sub>O was added, then the precipitated solid was washed with Et<sub>2</sub>O (20 mL) to give the desired product **1e** (1.65 g, 89% yield).

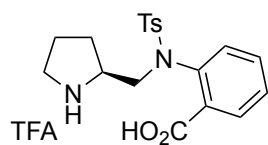

**(S)-2-((4-Methyl-N-(pyrrolidin-2-ylmethyl)phenyl)sulfonamido)benzoic acid TFA salt (1e):**

White solid, mp 180.0-180.5 °C. <sup>1</sup>H NMR (400 MHz, CDCl<sub>3</sub>) δ 10.71 (brs, 1H), 10.16 (brs, 0.6H), 9.57 (brs, 0.4H), 9.01 (brs, 0.6H), 8.79 (brs, 0.4H), 8.30-8.11 (m, 1H), 7.63-7.42 (m, 4H), 7.37-7.28 (m, 2H), 6.85 (d, *J* = 7.8 Hz, 0.4H), 6.80-6.68 (m, 0.6H), 4.96-4.81 (m, 0.6H), 4.76-4.63 (m, 0.4H), 4.10-3.95 (m, 0.4H), 3.95-3.73 (m, 1H), 3.64 (d, *J* = 16.0 Hz, 0.4H), 3.58-3.31 (m, 1.6H), 3.44 (d, *J* = 16.0 Hz, 0.6H), 2.44 (s, 3H), 2.28-2.12 (m, 0.6H), 2.12-1.76 (m, 2.6H), 1.73-1.58 (m, 0.4H), 1.38-1.22 (m, 0.4H). <sup>13</sup>C NMR (100 MHz, CDCl<sub>3</sub>) δ 144.5 and 144.1 (rotamers), 140.5, 137.9, 134.9 and 134.1 (rotamers), 133.1 and 132.9 (rotamers), 132.7 (2C), 130.0 and 129.9 (rotamers) (2C), 129.0 and 128.5 (rotamers), 127.9 and 127.6 (rotamers) (2C),

127.5 and 126.0 (rotamers), 59.5 and 59.3 (rotamers), 51.1 and 48.2 (rotamers), 45.4 and 45.1 (rotamers), 26.9 and 25.5 (rotamers), 22.9 and 22.2 (rotamers), 21.5. IR (neat) 2978, 2931, 2781, 1700, 1666, 1409, 1346, 1269, 1180, 1162, 1130  $\text{cm}^{-1}$ . HRMS (ESI)  $m/z$ :  $[\text{M}+\text{H}-\text{TFA}]^+$  calcd for  $\text{C}_{19}\text{H}_{23}\text{N}_2\text{O}_4\text{S}$  375.1373, found 375.1364.  $[\alpha]_{\text{D}}^{20} = 4.3$  ( $c$  1.1,  $\text{CHCl}_3$ , >99% ee (*S*)).

**Crystal data of 1e:** Recrystallization of **1e** was carried out by slow evaporation from  $\text{Et}_2\text{O}$  and MeOH solution at room temperature. Crystallographic data (excluding structure factors) for the structure reported in this paper have been deposited with the Cambridge Crystallographic Data Centre as supplementary publication no. CCDC-2098360. Copies of the data can be obtained free of charge on application to CCDC, 12 Union Road, Cambridge CB2 1EZ, UK [Fax: int. code + 44(1223)336-033; E-mail: deposit@ccdc.cam.ac.uk].

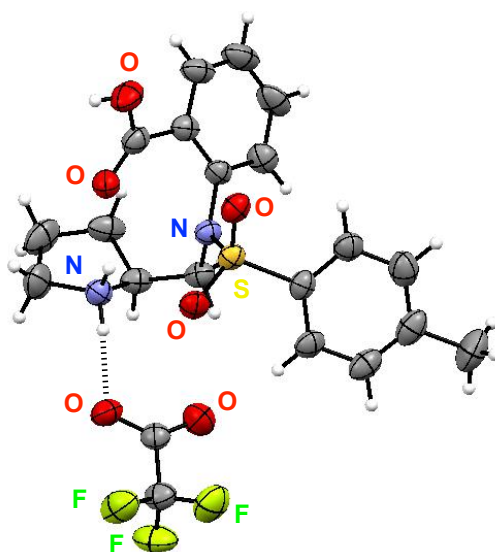

**Figure S1.** ORTEP drawing of **1e**. The ellipsoids correspond to 50% probability.

|                        |                                                                                                                                         |
|------------------------|-----------------------------------------------------------------------------------------------------------------------------------------|
| Formula                | $\text{C}_{21}\text{H}_{23}\text{F}_3\text{N}_2\text{O}_6\text{S}$                                                                      |
| Formula Weight         | 488.47                                                                                                                                  |
| Temperature            | 123 K                                                                                                                                   |
| Wavelength             | 1.54178 Å                                                                                                                               |
| Crystal System         | Monoclinic                                                                                                                              |
| Space Group            | P 1 21 1                                                                                                                                |
| Unit Cell Dimensions   | $a = 16.1768(16)$ Å $\alpha = 90.00^\circ$<br>$b = 7.6356(7)$ Å $\beta = 92.555(4)^\circ$<br>$c = 18.1963(17)$ Å $\gamma = 90.00^\circ$ |
| Volume                 | 2245.4(4) Å <sup>3</sup>                                                                                                                |
| Z Value                | 4                                                                                                                                       |
| Calculated Density     | 1.445 $\text{g cm}^{-3}$                                                                                                                |
| Absorption coefficient | 1.877 $\text{mm}^{-1}$                                                                                                                  |
| F(000)                 | 1016                                                                                                                                    |

|                                   |                                                      |
|-----------------------------------|------------------------------------------------------|
| Crystal size                      | 0.20×0.10×0.05 mm <sup>3</sup>                       |
| Theta Range for Data Collection   | 2.430-68.706°                                        |
| Index Ranges                      | -19 ≤ h ≤ 19, -9 ≤ k ≤ 9, -21 ≤ l ≤ 21               |
| Reflections Collected             | 27043                                                |
| Independent Reflections           | 7981 [R(int) = 0.0266]                               |
| Completeness to Theta = 68.706°   | 98.5%                                                |
| Refinement Method                 | Full-matrix least-squares on F <sup>2</sup>          |
| Data/ Restraints/ Parameters      | 7981/1/644                                           |
| Goodness-of-Fit on F <sup>2</sup> | 1.050                                                |
| Final R Indices [I>2sigma(I)]     | R <sub>1</sub> = 0.0547 and wR <sub>2</sub> = 0.1526 |
| R Indices (All Data)              | R <sub>1</sub> = 0.0560 and wR <sub>2</sub> = 0.1544 |
| Largest Diff. Peak and Hole       | 0.651 and -0.315 e <sup>-</sup> / Å <sup>3</sup>     |
| Flack x                           | 0.055(6)                                             |

### < Synthesis of Chiral Anthranilic Pyrrolidine Peptide-like Catalyst (1o) >

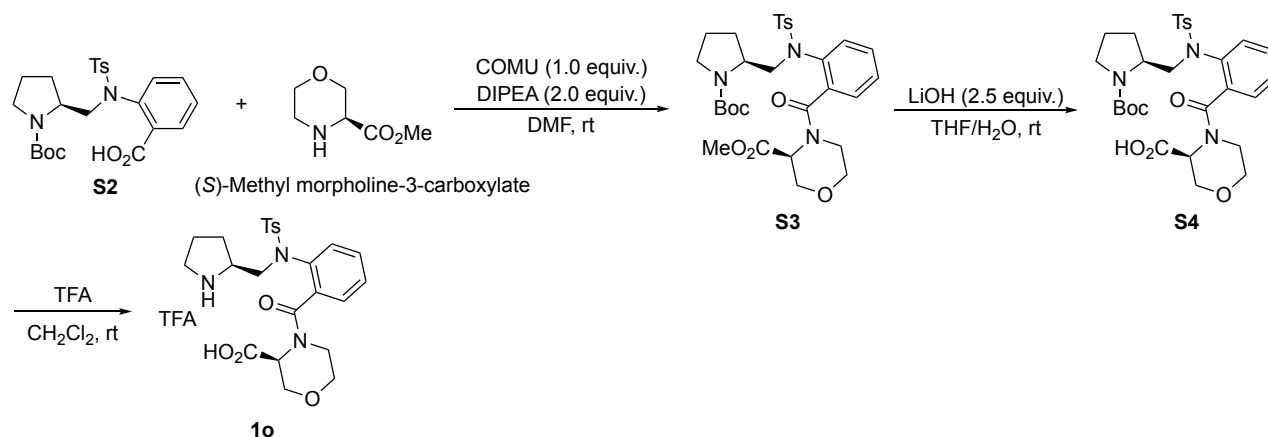

To a solution of **S2** (985.9 mg, 2.08 mmol) and DIPEA (361.8  $\mu\text{L}$ , 2.08 mmol) in DMF (10 mL) was added COMU (889.7 mg, 2.08 mmol) at 0 °C, the mixture was stirred at 0 °C for 10 min. Then, **(S)-methyl morpholine-3-carboxylate** (301.6 mg, 2.08 mmol) and DIPEA (361.8  $\mu\text{L}$ , 2.08 mmol) was added to the mixture at 0 °C, the mixture was stirred at 0 °C for 1 h. The reaction mixture was stirred at room temperature for 18 h. H<sub>2</sub>O (5 mL) was added to the mixture, and the product was extracted with AcOEt (15 mL  $\times$  3). The organic phase was washed with saturated NaHCO<sub>3</sub> aqueous solution, 1N HCl aqueous solution, and brine, and dried over Na<sub>2</sub>SO<sub>4</sub>. The organic phase was concentrated under reduced pressure, and the crude product was purified by column chromatography (eluent: hexane/AcOEt = 3/2) to give the desired product **S3** (967.8 mg, 77% yield).

To a solution of **S3** (967.8 mg, 1.61 mmol) in THF (8 mL) and H<sub>2</sub>O (8mL) was added LiOH

(96.3 mg, 4.02 mmol) at room temperature. The reaction mixture was stirred room temperature for 18 h. The reaction mixture was washed with Et<sub>2</sub>O (15 mL×3). The aqueous layer was acidified with 1N HCl aqueous solution until pH to 1. The product was extracted with AcOEt (15 mL × 3). The organic phase was dried over Na<sub>2</sub>SO<sub>4</sub>. The organic phase was concentrated under reduced pressure to give the desired product **S4** (708.4 mg, 75% yield).

To a solution of **S4** (708.4 mg, 1.21 mmol) in CH<sub>2</sub>Cl<sub>2</sub> (12 mL) was added TFA (3 mL) at room temperature. The reaction mixture was stirred room temperature for 18 h. The volatile solvents were removed under reduced pressure. Et<sub>2</sub>O was added, then the precipitated solid was washed with Et<sub>2</sub>O (20 mL) to give the desired product **1o** (550.8 mg, 76% yield).

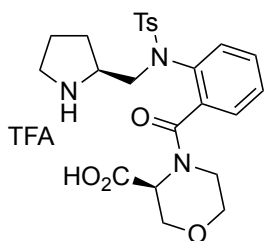

**(S)-4-(2-((4-Methyl-N-((S)-pyrrolidin-2-yl)methyl)phenyl)sulfonamido)benzoyl)morpholine-3-carboxylic acid TFA salt (**1o**):** White solid, mp 146.5-147.0 °C. <sup>1</sup>H NMR (400 MHz, CDCl<sub>3</sub>) δ 11.25 (brs, 1H), 10.16 (brs, 0.7H), 9.54 (brs, 1H), 9.46 (brs, 0.3 H), 7.57-7.29 (m, 7H), 6.75 (d, *J* = 8.0 Hz, 0.7H), 6.70 (d, *J* = 7.2 Hz, 0.3H), 5.23 (s, 0.7H), 4.60 (d, *J* = 12.8 Hz, 0.3H), 4.51 (d, *J* = 12.0 Hz, 0.7H), 4.28 (d, *J* = 11.6 Hz, 0.3H), 4.24-4.04 (m, 1.3H), 4.04-3.35 (m, 7.4H), 3.35-3.13 (m, 1.3H), 2.46 (s, 3H), 2.36-1.92 (m, 3.3H), 1.92-1.74 (m, 0.7H). <sup>13</sup>C NMR (100 MHz, CDCl<sub>3</sub>) δ 171.7 and 170.8 (rotamers), 170.4 and 169.5 (rotamers), 161.4, 144.9 and 144.7 (rotamers), 137.25 and 137.19 (rotamers), 136.2 and 135.5 (rotamers), 133.7 and 133.1 (rotamers), 131.4 and 131.1 (rotamers), 129.8 (2C), 128.9 and 128.8 (rotamers), 128.3 and 127.7 (rotamers), 128.2 and 127.4 (rotamers), 127.8 (2C), 67.7 and 67.3 (rotamers), 66.3 and 66.1 (rotamers), 63.1 and 58.9 (rotamers), 52.2 and 50.1 (rotamers), 45.9 and 44.2 (rotamers), 44.7 and 39.6 (rotamers), 26.5 and 25.5 (rotamers), 22.0 and 21.7 (rotamers), 21.5. IR (neat) 2986, 2947, 1720, 1681, 1619, 1459, 1393, 1349, 1307, 1166, 1133, 1118 cm<sup>-1</sup>. HRMS (ESI) *m/z*: [M+H-TFA]<sup>+</sup> calcd for C<sub>24</sub>H<sub>30</sub>N<sub>3</sub>O<sub>6</sub>S 488.1850, found 488.1844. [α]<sub>D</sub><sup>20</sup> = -52.9 (*c* 1.1, CHCl<sub>3</sub>, >99% ee (*S*)).

### 3. Procedure for Enantioselective Michael Reaction of Nitroalkenes (**2**) with Cyclic Ketones (**3**) Using Anthranilic Pyrrolidine Catalyst (**1e**) (Scheme 2 and Scheme 3).

To a solution of catalyst **1e** (12.2 mg, 0.025 mmol) in *i*-PrOH (250 μL) was added 2,6-lutidine (2.9

$\mu\text{L}$ , 0.025 mmol) at room temperature, and the reaction mixture was stirred at room temperature for 10 min. Then, *trans*- $\beta$ -nitrostyrene (**2a**) (37.3 mg, 0.25 mmol) and cyclohexanone (**3a**) (259.1  $\mu\text{L}$ , 2.5 mmol) was added to the mixture at room temperature, and the mixture was stirred at room temperature for 48 h. Saturated  $\text{NaHCO}_3$  aqueous solution (5 mL) was added to the mixture, and the product was extracted with AcOEt (15 mL  $\times$  3). The organic phase was washed with brine and dried over  $\text{Na}_2\text{SO}_4$ . The organic phase was concentrated under reduced pressure, and the crude product was purified by column chromatography (eluent: hexane/AcOEt = 5/1) to give the desired product **4a** (61.5 mg, >99% yield, dr = 93:7, 96% ee).

**Table S1.** Screening for chiral anthranilic pyrrolidine catalyst (**1**) for enantioselective Michael reaction of  $\beta$ -nitrostyrene (**2a**) with cyclohexanone (**3a**).

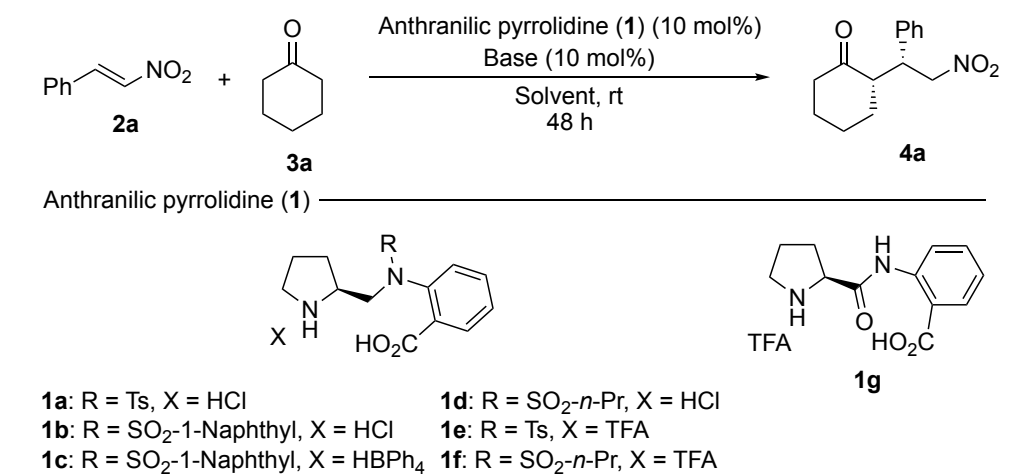

| Entry           | Cat       | Base             | Solvent        | Yield (%) | Dr    | Ee (%) <sup>a</sup> |
|-----------------|-----------|------------------|----------------|-----------|-------|---------------------|
| 1               | <b>1a</b> | NMM <sup>b</sup> | <i>i</i> -PrOH | 70        | 92:8  | 93                  |
| 2               | <b>1a</b> | Pyridine         | <i>i</i> -PrOH | 39        | 96:4  | 95                  |
| 3               | <b>1a</b> | 2,6-Lutidine     | <i>i</i> -PrOH | 90        | 96:4  | 95                  |
| 4               | <b>1a</b> | 2,6-Lutidine     | DMSO           | 58        | 88:12 | 93                  |
| 5               | <b>1b</b> | 2,6-Lutidine     | <i>i</i> -PrOH | 72        | 97:3  | 96                  |
| 6               | <b>1c</b> | 2,6-Lutidine     | <i>i</i> -PrOH | 78        | 97:3  | 96                  |
| 7               | <b>1d</b> | 2,6-Lutidine     | <i>i</i> -PrOH | 38        | 96:4  | 93                  |
| 8               | <b>1e</b> | 2,6-Lutidine     | <i>i</i> -PrOH | >99       | 93:7  | 96                  |
| 9               | <b>1f</b> | 2,6-Lutidine     | <i>i</i> -PrOH | 80        | 96:4  | 91                  |
| 10              | <b>1g</b> | 2,6-Lutidine     | <i>i</i> -PrOH | >99       | 92:8  | 58                  |
| 11 <sup>c</sup> | <b>1e</b> | 2,6-Lutidine     | <i>i</i> -PrOH | 84        | 96:4  | 94                  |
| 12              | <b>1e</b> | -                | <i>i</i> -PrOH | 64        | 97:3  | 95                  |

<sup>a</sup>Numbers indicate ee of *syn*-product as the major diastereomer. <sup>b</sup>NMM=*N*-methylmorpholine. <sup>c</sup>2,6-Lutidine

(20 mol%) was used.

**Table S2.** Other chiral 2-substituted pyrrolidine catalyst for enantioselective Michael reaction of  $\beta$ -nitrostyrene (**2a**) with cyclohexanone (**3a**).

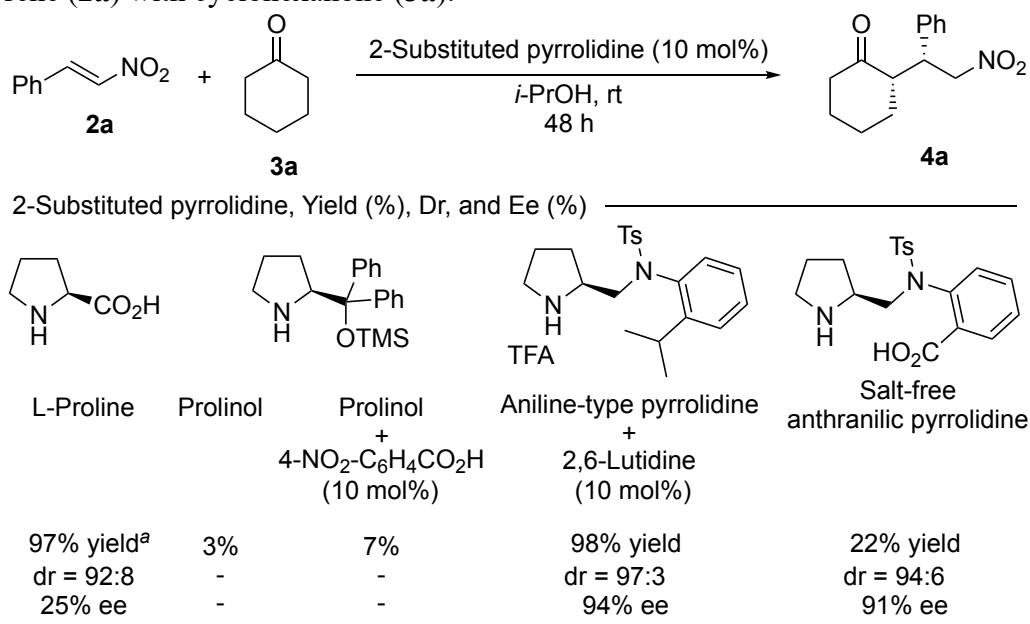

<sup>a</sup> For 24 h

<sup>a</sup> The reaction was carried out for 24 h.

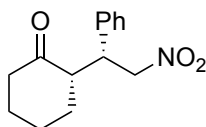

**(S)-2-((R)-2-Nitro-1-phenylethyl)cyclohexan-1-one (4a):**<sup>1</sup> >99% yield, 61.5 mg, White solid, mp 132.5-133.0 °C. <sup>1</sup>H NMR (400 MHz, CDCl<sub>3</sub>)  $\delta$  7.35-7.29 (m, 2H), 7.29-7.24 (m, 1H), 7.19-7.14 (m, 2H), 4.94 (dd,  $J$  = 12.6, 4.6 Hz, 1H), 4.63 (dd,  $J$  = 12.6, 10.1 Hz, 1H), 4.63 (td,  $J$  = 10.1, 4.6 Hz, 1H), 2.74-2.64 (m, 1H), 2.52-2.44 (m, 1H), 2.44-2.34 (m, 1H), 2.14-2.03 (m, 1H), 1.83-1.50 (m, 4H), 1.30-1.17 (m, 1H). <sup>13</sup>C NMR (100 MHz, CDCl<sub>3</sub>)  $\delta$  212.0, 137.7, 128.9 (2C), 128.1 (2C), 127.8, 78.9, 52.5, 43.9, 42.7, 33.2, 28.5, 25.0. IR (neat) 2955, 1696, 1550, 1385, 1129, 1013 cm<sup>-1</sup>.  $[\alpha]_D^{20}$  = -29.3 ( $c$  1.1, CHCl<sub>3</sub>, 93% ee (*S,R*)). HPLC analysis; Daicel Chiralpack AS-H, Hexane/*i*-PrOH = 75/25, flow rate = 1.0 mL/min, 254 nm,  $t_R$  = 9.3 min (minor, *R,S*), 13.4 min (major, *S,R*).



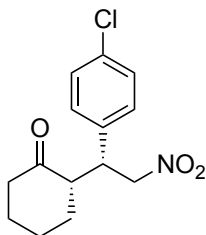

**(S)-2-((R)-1-(4-chlorophenyl)-2-nitroethyl)cyclohexan-1-one (4b):**<sup>1</sup> 90% yield, 63.1 mg, White solid. <sup>1</sup>H NMR (400 MHz, CDCl<sub>3</sub>) δ 7.33-7.28 (m, 2H), 7.15-7.09 (m, 2H), 4.93 (dd, *J* = 12.7, 4.6 Hz, 1H), 4.60 (dd, *J* = 12.7, 10.1 Hz, 1H), 3.76 (td, *J* = 10.1, 4.6 Hz, 1H), 2.70-2.60 (m, 1H), 2.52-2.44 (m, 1H), 2.44-2.32 (m, 1H), 2.15-2.04 (m, 1H), 1.86-1.50 (m, 4H), 1.30-1.16 (m, 1H). <sup>13</sup>C NMR (100 MHz, CDCl<sub>3</sub>) δ 211.5, 136.2, 133.6, 129.5 (2C), 129.1 (2C), 78.6, 52.4, 43.3, 42.7, 33.1, 28.4, 25.0. IR (neat) 2947, 1697, 1553, 1386, 1131, 1099, 1013 cm<sup>-1</sup>. HPLC analysis; Daicel Chiralpack AS-H, Hexane/*i*-PrOH = 90/10, flow rate = 1.0 mL/min, 254 nm, *t*<sub>R</sub> = 17.2 min (minor, *R,S*), 29.8 min (major, *S,R*).

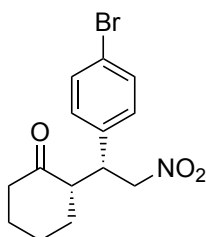

**(S)-2-((R)-1-(4-Bromophenyl)-2-nitroethyl)cyclohexan-1-one (4c):**<sup>1</sup> 94% yield, 77.0 mg, White solid. <sup>1</sup>H NMR (400 MHz, CDCl<sub>3</sub>) δ 7.48-7.42 (m, 2H), 7.09-7.04 (m, 2H), 4.93 (dd, *J* = 12.8, 4.6 Hz, 1H), 4.60 (dd, *J* = 12.8, 10.2 Hz, 1H), 3.75 (td, *J* = 10.2, 4.6 Hz, 1H), 2.65 (dddd, *J* = 10.7, 10.0, 5.3, 0.9 Hz, 1H), 2.52-2.44 (m, 1H), 2.43-2.32 (m, 1H), 2.15-2.04 (m, 1H), 1.85-1.51 (m, 4H), 1.29-1.17 (m, 1H). <sup>13</sup>C NMR (100 MHz, CDCl<sub>3</sub>) δ 211.5, 136.8, 132.1 (2C), 129.9 (2C), 121.7, 78.5, 52.3, 43.4, 42.7, 33.1, 28.4, 25.0. IR (neat) 2931, 1696, 1552, 1387, 1130, 1074, 1011 cm<sup>-1</sup>. HPLC analysis; Daicel Chiralpack AS-H, Hexane/*i*-PrOH = 90/10, flow rate = 1.0 mL/min, 210 nm, *t*<sub>R</sub> = 17.0 min (minor, *R,S*), 29.4 min (major, *S,R*).

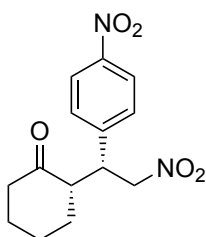

**(S)-2-((R)-2-Nitro-1-(4-nitrophenyl)ethyl)cyclohexan-1-one (4d):**<sup>2</sup> 79% yield, 57.7 mg, Yellow solid. <sup>1</sup>H NMR (400 MHz, CDCl<sub>3</sub>) δ 8.25-8.17 (m, 2H), 7.45-7.36 (m, 2H), 5.00 (dd, *J* = 13.2, 4.8 Hz, 1H), 4.70 (dd, *J* = 13.2, 10.2 Hz, 1H), 3.94 (td, *J* = 10.2, 4.8 Hz, 1H), 2.77-2.67 (m, 1H),

2.55-2.46 (m, 1H), 2.46-2.34 (m, 1H), 2.18-2.08 (m, 1H), 1.87-1.78 (m, 1H), 1.75-1.56 (m, 3H), 1.34-1.18 (m, 1H).  $^{13}\text{C}$  NMR (100 MHz,  $\text{CDCl}_3$ )  $\delta$  210.8, 147.4, 145.5, 129.3 (2C), 124.0 (2C), 77.9, 52.1, 43.7, 42.7, 33.1, 28.2, 25.0. IR (neat) 2943, 1705, 1550, 1518, 1345, 1130, 1015  $\text{cm}^{-1}$ . HPLC analysis; Daicel Chiralpack AD-H, Hexane/*i*-PrOH = 75/25, flow rate = 1.0 mL/min, 254 nm,  $t_{\text{R}}$  = 13.3 min (minor, *R,S*), 27.9 min (major, *S,R*).

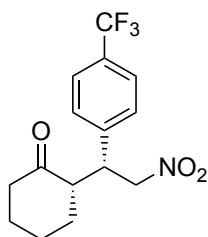

**(*S*)-2-((*R*)-2-Nitro-1-(4-(trifluoromethyl)phenyl)ethyl)cyclohexan-1-one (4e):**<sup>3</sup> 90% yield, 70.9 mg, White solid.  $^1\text{H}$  NMR (400 MHz,  $\text{CDCl}_3$ )  $\delta$  7.59 (d,  $J$  = 8.2 Hz, 2H), 7.32 (d,  $J$  = 8.2 Hz, 2H), 4.97 (dd,  $J$  = 13.0, 4.6 Hz, 1H), 4.67 (dd,  $J$  = 13.0, 10.1 Hz, 1H), 3.86 (td,  $J$  = 10.1, 4.6 Hz, 1H), 2.70 (dddd,  $J$  = 12.7, 9.8, 5.2, 0.9 Hz, 1H), 2.53-2.45 (m, 1H), 2.44-2.33 (m, 1H), 2.16-2.06 (m, 1H), 1.86-1.76 (m, 1H), 1.76-1.51 (m, 3H), 1.31-1.18 (m, 1H).  $^{13}\text{C}$  NMR (100 MHz,  $\text{CDCl}_3$ )  $\delta$  211.3, 142.0, 130.0 (q,  $J_{\text{C-F}}$  = 33.3 Hz), 128.7 (2C), 125.9 (q,  $J_{\text{C-F}}$  = 2.9 Hz, 2C), 123.9 (q,  $J_{\text{C-F}}$  = 276.6 Hz), 78.3, 52.3, 43.7, 42.7, 33.2, 28.4, 25.1.  $^{19}\text{F}$  NMR (376 MHz,  $\text{CDCl}_3$ )  $\delta$  -62.6. IR (neat) 2961, 1697, 1555, 1329, 1115, 1017  $\text{cm}^{-1}$ . HPLC analysis; Daicel Chiralpack AS-H, Hexane/*i*-PrOH = 90/10, flow rate = 1.0 mL/min, 254 nm,  $t_{\text{R}}$  = 11.4 min (minor, *R,S*), 19.2 min (major, *S,R*).

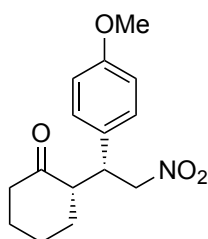

**(*S*)-2-((*R*)-1-(4-Methoxyphenyl)-2-nitroethyl)cyclohexan-1-one (4f):**<sup>1</sup> 94% yield, 65.4 mg, White solid, mp 148.0-148.5  $^{\circ}\text{C}$ .  $^1\text{H}$  NMR (400 MHz,  $\text{CDCl}_3$ )  $\delta$  7.11-7.05 (m, 2H), 6.88-6.82 (m, 2H), 4.91 (dd,  $J$  = 12.6, 4.8 Hz, 1H), 4.59 (dd,  $J$  = 12.6, 10.1 Hz, 1H), 3.78 (s, 3H), 3.71 (td,  $J$  = 10.1, 4.8 Hz, 1H), 2.70-2.59 (m, 1H), 2.52-2.43 (m, 1H), 2.43-2.33 (m, 1H), 2.13-2.02 (m, 1H), 1.84-1.50 (m, 4H), 1.30-1.17 (m, 1H).  $^{13}\text{C}$  NMR (100 MHz,  $\text{CDCl}_3$ )  $\delta$  212.1, 159.0, 129.5, 129.1 (2C), 114.3 (2C), 79.1, 55.2, 52.7, 43.2, 42.7, 33.1, 28.5, 25.0. IR (neat) 2953, 1699, 1551, 1390, 1255, 1130, 1026  $\text{cm}^{-1}$ .  $[\alpha]_{\text{D}}^{20}$  = -21.5 ( $c$  1.1,  $\text{CHCl}_3$ , 94% ee (*S*)). HPLC analysis; Daicel Chiralpack AD-H, Hexane/*i*-PrOH = 75/25, flow rate = 0.7 mL/min, 210 nm,  $t_{\text{R}}$  = 10.3 min (minor, *R,S*), 12.2 min (major, *S,R*).

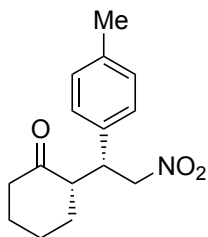

**(S)-2-((R)-2-Nitro-1-(p-tolyl)ethyl)cyclohexan-1-one (4g):**<sup>1</sup> 96% yield, 62.7 mg, White solid, mp 130.0-130.5 °C. <sup>1</sup>H NMR (400 MHz, CDCl<sub>3</sub>) δ 7.15-7.09 (m, 2H), 7.07-7.02 (m, 2H), 4.92 (dd, *J* = 12.6, 4.6 Hz, 1H), 4.61 (dd, *J* = 12.6, 10.1 Hz, 1H), 3.72 (td, *J* = 10.1, 4.6 Hz, 1H), 2.71-2.62 (m, 1H), 2.51-2.44 (m, 1H), 2.44-2.33 (m, 1H), 2.31 (s, 3H), 2.12-2.03 (m, 1H), 1.83-1.50 (m, 4H), 1.30-1.17 (m, 1H). <sup>13</sup>C NMR (100 MHz, CDCl<sub>3</sub>) δ 212.1, 137.4, 134.5, 129.6 (2C), 128.0 (2C), 79.0, 52.5, 43.6, 42.7, 33.2, 28.5, 25.0, 21.1. IR (neat) 2949, 1697, 1551, 1386, 1130, 1015 cm<sup>-1</sup>. [α]<sub>D</sub><sup>20</sup> = -30.0 (*c* 1.1, CHCl<sub>3</sub>, 97% ee (*S*)). HPLC analysis; Daicel Chiralpack AS-H, Hexane/*i*-PrOH = 90/10, flow rate = 1.0 mL/min, 254 nm, *t*<sub>R</sub> = 11.7 min (minor, *R,S*), 20.5 min (major, *S,R*).

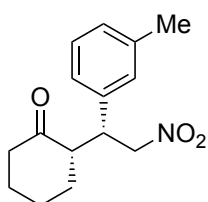

**(S)-2-((R)-2-Nitro-1-(m-tolyl)ethyl)cyclohexan-1-one (4h):**<sup>4</sup> 87% yield, 56.6 mg, White solid, mp 98.0-98.5 °C. <sup>1</sup>H NMR (400 MHz, CDCl<sub>3</sub>) δ 7.24-7.17 (m, 1H), 7.10-7.02 (m, 1H), 6.98-6.92 (m, 2H), 4.93 (dd, *J* = 12.8, 4.6 Hz, 1H), 4.62 (dd, *J* = 12.8, 10.1 Hz, 1H), 3.71 (td, *J* = 10.1, 4.6 Hz, 1H), 2.72-2.62 (m, 1H), 2.52-2.44 (m, 1H), 2.44-2.34 (m, 1H), 2.33 (s, 3H), 2.14-2.02 (m, 1H), 1.83-1.50 (m, 4H), 1.31-1.17 (m, 1H). <sup>13</sup>C NMR (100 MHz, CDCl<sub>3</sub>) δ 212.1, 138.5, 137.6, 128.9, 128.7, 128.5, 125.0, 78.9, 52.5, 43.9, 42.7, 33.2, 28.5, 25.0, 21.4. IR (neat) 2950, 1699, 1550, 1384, 1130, 1015 cm<sup>-1</sup>. [α]<sub>D</sub><sup>20</sup> = -25.2 (*c* 1.1, CHCl<sub>3</sub>, 94% ee (*S*)). HPLC analysis; Daicel Chiralpack AS-H, Hexane/*i*-PrOH = 85/15, flow rate = 1.0 mL/min, 254 nm, *t*<sub>R</sub> = 10.6 min (minor, *R,S*), 17.6 min (major, *S,R*).

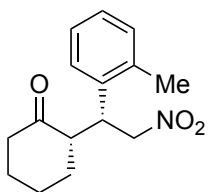

**(S)-2-((R)-2-Nitro-1-(o-tolyl)ethyl)cyclohexan-1-one (4i):**<sup>4</sup> 94% yield, 61.2 mg, White solid, mp

83.0-83.5 °C. <sup>1</sup>H NMR (400 MHz, CDCl<sub>3</sub>) δ 7.23-7.17 (m, 1H), 7.17-7.13 (m, 2H), 7.12-7.08 (m, 1H), 5.00 (dd, *J* = 12.8, 4.6 Hz, 1H), 4.61 (dd, *J* = 12.8, 10.6 Hz, 1H), 4.12 (td, *J* = 10.6, 4.6 Hz, 1H), 2.71-2.60 (m, 1H), 2.52-2.45 (m, 1H), 2.44-2.34 (m, 1H), 2.36 (s, 3H), 2.15-2.04 (m, 1H), 1.80-1.62 (m, 3H), 1.61-1.47 (m, 1H), 1.30-1.17 (m, 1H). <sup>13</sup>C NMR (100 MHz, CDCl<sub>3</sub>) δ 212.3, 137.4, 136.4, 131.0, 127.3, 126.7, 125.6, 78.7, 53.4, 42.9, 38.2, 32.9, 28.7, 25.3, 19.9. IR (neat) 2940, 1704, 1548, 1379, 1130 cm<sup>-1</sup>. [α]<sub>D</sub><sup>20</sup> = -33.3 (*c* 1.1, CHCl<sub>3</sub>, 97% ee (*S*)). HPLC analysis; Daicel Chiralpack AS-H, Hexane/*i*-PrOH = 85/15, flow rate = 1.0 mL/min, 254 nm, *t*<sub>R</sub> = 10.3 min (minor, *R,S*), 10.8 min (major, *S,R*).

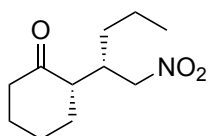

**(*S*)-2-((*S*)-1-Nitropentan-2-yl)cyclohexan-1-one (4j):** 90% yield, 47.8 mg, Colorless oil. <sup>1</sup>H NMR (400 MHz, CDCl<sub>3</sub>) δ 4.56 (dd, *J* = 12.6, 6.2 Hz, 1H), 4.40 (dd, *J* = 12.6, 6.4 Hz, 1H), 2.65-2.54 (m, 1H), 2.54-2.45 (m, 1H), 2.45-2.37 (m, 1H), 2.37-2.22 (m, 1H), 2.17-2.03 (m, 2H), 2.01-1.88 (m, 1H), 1.77-1.57 (m, 2H), 1.57-1.20 (m, 5H), 0.92 (t, *J* = 7.2 Hz, 3H). <sup>13</sup>C NMR (100 MHz, CDCl<sub>3</sub>) δ 211.3, 77.1, 51.3, 42.6, 37.0, 31.4, 30.2, 27.7, 25.2, 20.2, 14.0. IR (neat) 2958, 1707, 1547, 1381, 1124, 1018 cm<sup>-1</sup>. HRMS (ESI) *m/z*: [M+Na]<sup>+</sup> calcd for C<sub>11</sub>H<sub>19</sub>NNaO<sub>3</sub> 236.1257, found 236.1259. HPLC analysis; Daicel Chiralpack AD-H, Hexane/*i*-PrOH = 75/25, flow rate = 0.7 mL/min, 214 nm, *t*<sub>R</sub> = 6.7 min (major, *S,R*), 7.4 min (minor, *R,S*). The absolute configuration of **4j** was assigned from that of **4m** by analogy of the HPLC analysis.

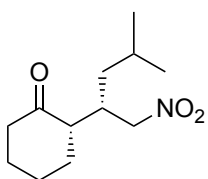

**(*S*)-2-((*S*)-4-Methyl-1-nitropentan-2-yl)cyclohexan-1-one (4k):**<sup>5</sup> 80% yield, 45.7 mg, Colorless oil. <sup>1</sup>H NMR (400 MHz, CDCl<sub>3</sub>) δ 4.59 (dd, *J* = 12.8, 5.4 Hz, 1H), 4.38 (dd, *J* = 12.8, 6.8 Hz, 1H), 2.69-2.58 (m, 1H), 2.56-2.47 (m, 1H), 2.44-2.26 (m, 2H), 2.18-2.05 (m, 2H), 2.01-1.88 (m, 1H), 1.76-1.42 (m, 4H), 1.30 (ddd, *J* = 14.0, 8.4, 5.2 Hz, 1H), 1.19 (ddd, *J* = 14.0, 9.0, 5.6 Hz, 1H), 0.95 (d, *J* = 6.4 Hz, 3H), 0.91 (d, *J* = 6.8 Hz, 3H). <sup>13</sup>C NMR (100 MHz, CDCl<sub>3</sub>) δ 211.2, 77.2, 51.5, 42.6, 38.5, 35.2, 30.2, 27.6, 25.5, 25.3, 23.1, 21.8. IR (neat) 2953, 1707, 1547, 1382, 1208, 1124, 1066 cm<sup>-1</sup>. [α]<sub>D</sub><sup>20</sup> = -39.7 (*c* 1.1, CHCl<sub>3</sub>, 97% ee (*S*)). HPLC analysis; Daicel Chiralpack IA, Hexane/*i*-PrOH = 95/5, flow rate = 0.5 mL/min, 210 nm, *t*<sub>R</sub> = 11.6 min (major, *S,R*), 12.6 min (minor, *R,S*).

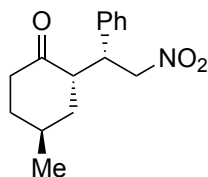

**(2S,4S)-4-Methyl-2-((R)-2-nitro-1-phenylethyl)cyclohexan-1-one (4l):**<sup>2</sup> 92% yield, 59.9 mg, White solid. <sup>1</sup>H NMR (400 MHz, CDCl<sub>3</sub>) δ 7.38-7.23 (m, 3H), 7.20-7.14 (m, 2H), 4.69 (dd, *J* = 13.2, 4.8 Hz, 1H), 4.60 (dd, *J* = 13.2, 10.6 Hz, 1H), 3.80 (td, *J* = 10.6, 4.8 Hz, 1H), 2.77-2.68 (m, 1H), 2.54-2.46 (m, 2H), 2.12-1.94 (m, 2H), 1.69-1.58 (m, 1H), 1.52-1.36 (m, 2H), 0.97 (d, *J* = 6.8 Hz, 3H). <sup>13</sup>C NMR (100 MHz, CDCl<sub>3</sub>) δ 213.0, 137.2, 129.1 (2C), 128.01, 127.97 (2C), 79.1, 50.1, 44.1, 38.6, 37.8, 34.4, 26.5, 19.4. IR (neat) 2957, 1705, 1549, 1455, 1379, 1200, 1129 cm<sup>-1</sup>. HPLC analysis; Daicel Chiralpack AS-H, Hexane/EtOH = 90/10, flow rate = 0.7 mL/min, 210 nm, *t*<sub>R</sub> = 13.1 min (minor, *R,S*), 19.4 min (major, *S,R*).

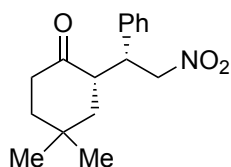

**(S)-4,4-Dimethyl-2-((R)-2-nitro-1-phenylethyl)cyclohexan-1-one (4m):**<sup>2</sup> 54% yield, 36.9 mg, White solid, mp 93.5-94.0 °C. <sup>1</sup>H NMR (400 MHz, CDCl<sub>3</sub>) δ 7.36-7.23 (m, 3H), 7.17-7.11 (m, 2H), 5.00 (dd, *J* = 12.6, 4.6 Hz, 1H), 4.63 (dd, *J* = 12.6, 9.8 Hz, 1H), 3.70 (td, *J* = 9.8, 4.6 Hz, 1H), 2.92-2.81 (m, 1H), 2.62-2.50 (m, 1H), 2.31 (ddd, *J* = 13.8, 4.8, 2.8 Hz, 1H), 1.80-1.70 (m, 1H), 1.64 (td, *J* = 14.0, 4.6 Hz, 1H), 1.37 (ddd, *J* = 13.8, 5.2, 3.4 Hz, 1H), 1.22 (t, *J* = 13.8 Hz, 1H), 1.13 (s, 3H), 0.88 (s, 3H). <sup>13</sup>C NMR (100 MHz, CDCl<sub>3</sub>) δ 212.6, 137.7, 128.9 (2C), 128.1 (2C), 127.7, 79.0, 47.6, 45.8, 43.8, 40.7, 39.1, 31.0 (2C), 24.3. IR (neat) 2957, 1707, 1549, 1431, 1377, 1122 cm<sup>-1</sup>. [ $\alpha$ ]<sub>D</sub><sup>20</sup> = -53.8 (*c* 1.0, CHCl<sub>3</sub>, 93% ee (*S*)). HPLC analysis; Daicel Chiralpack AD-H, Hexane/*i*-PrOH = 95/5, flow rate = 1.0 mL/min, 210 nm, *t*<sub>R</sub> = 8.5 min (minor, *R,S*), 10.5 min (major, *S,R*).

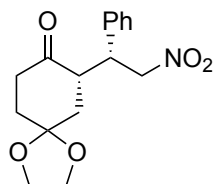

**(S)-7-((R)-2-Nitro-1-phenylethyl)-1,4-dioxaspiro[4.5]decan-8-one (4n):**<sup>6</sup> 89% yield, 68.1 mg, White solid, mp 129.0-129.5 °C. <sup>1</sup>H NMR (400 MHz, CDCl<sub>3</sub>) δ 7.36-7.29 (m, 2H), 7.29-7.23 (m, 1H), 7.19-7.14 (m, 2H), 4.94 (dd, *J* = 12.8, 4.8 Hz, 1H), 4.61 (dd, *J* = 12.8, 10.1 Hz, 1H), 4.01-3.78 (m, 5H), 3.11-3.01 (m, 1H), 2.76-2.64 (m, 1H), 4.46 (ddd, *J* = 14.2, 5.3, 3.4 Hz, 1H), 2.09-2.01 (m, 1H), 1.95 (td, *J* = 13.5, 5.2 Hz, 1H), 1.68 (ddd, *J* = 13.7, 5.7, 3.4 Hz, 1H), 1.55 (t, *J* = 13.5 Hz, 1H).

$^{13}\text{C}$  NMR (100 MHz,  $\text{CDCl}_3$ )  $\delta$  210.5, 137.3, 129.1 (2C), 128.3 (2C), 128.0, 107.1, 79.0, 64.9, 64.6, 48.2, 43.5, 39.4, 38.7, 35.1. IR (neat) 2954, 1719, 1545, 1381, 1119, 1045  $\text{cm}^{-1}$ .  $[\alpha]_{\text{D}}^{20} = -13.1$  (*c* 1.1,  $\text{CHCl}_3$ , 97% ee (*S*)). HPLC analysis; Daicel Chiralpack AS-H, Hexane/*i*-PrOH = 80/20, flow rate = 1.0 mL/min, 210 nm,  $t_{\text{R}} = 16.3$  min (minor, *R,S*), 27.1 min (major, *S,R*).

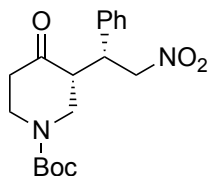

**tert-butyl (*R*)-3-((*R*)-2-Nitro-1-phenylethyl)-4-oxopiperidine-1-carboxylate (4o):**<sup>7</sup> 85% yield, 74.3 mg, White solid.  $^1\text{H}$  NMR (400 MHz,  $\text{CDCl}_3$ )  $\delta$  7.39-7.27 (m, 3H), 7.23-7.16 (m, 2H), 4.94 (dd,  $J = 12.8, 4.4$  Hz, 1H), 4.60 (dd,  $J = 12.8, 10.0$  Hz, 1H), 4.37-4.08 (brs, 1H), 4.00-3.66 (m, 2H), 3.31-3.11 (m, 1H), 2.90-2.65 (m, 2H), 2.62-2.45 (m, 2H), 1.57-1.17 (m, 9H).  $^{13}\text{C}$  NMR (100 MHz,  $\text{CDCl}_3$ )  $\delta$  208.4, 154.0, 136.3, 129.2 (2C), 128.2, 128.0 (2C), 80.7, 78.8, 51.9, 48.1, 44.2, 41.80, 41.75, 28.2 (3C). IR (neat) 2927, 1691, 1550, 1412, 1367, 1241, 1161  $\text{cm}^{-1}$ . HPLC analysis; Daicel Chiralpack OD-H, Hexane/*i*-PrOH = 90/10, flow rate = 1.0 mL/min, 254 nm,  $t_{\text{R}} = 17.1$  min (minor, *R,S*), 19.3 min (major, *S,R*).

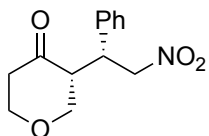

**(*R*)-3-((*R*)-2-Nitro-1-phenylethyl)tetrahydro-4*H*-pyran-4-one (4p):**<sup>1</sup> 98% yield, 60.8 mg, White solid.  $^1\text{H}$  NMR (400 MHz,  $\text{CDCl}_3$ )  $\delta$  7.39-7.23 (m, 3H), 7.22-7.14 (m, 2H), 4.94 (dd,  $J = 12.9, 4.6$  Hz, 1H), 4.65 (dd,  $J = 12.9, 10.3$  Hz, 1H), 4.20-4.08 (m, 1H), 3.89-3.73 (m, 2H), 3.70 (ddd,  $J = 12.0, 5.6, 1.2$  Hz, 1H), 3.27 (dd,  $J = 11.8, 9.1$  Hz, 1H), 2.94-2.83 (m, 1H), 2.73-2.62 (m, 1H), 2.56 (dt,  $J = 14.2, 4.0$  Hz, 1H).  $^{13}\text{C}$  NMR (100 MHz,  $\text{CDCl}_3$ )  $\delta$  207.4, 136.2, 129.2 (2C), 128.3, 127.9 (2C), 78.7, 71.6, 69.0, 53.2, 43.0, 41.3. IR (neat) 2862, 1698, 1552, 1456, 1383, 1236, 1150, 1109  $\text{cm}^{-1}$ . HPLC analysis; Daicel Chiralpack IA, Hexane/*i*-PrOH = 85/15, flow rate = 1.0 mL/min, 210 nm,  $t_{\text{R}} = 14.7$  min (minor, *R,S*), 25.6 min (major, *S,R*).

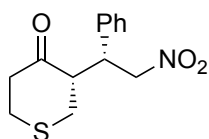

**(*S*)-3-((*R*)-2-Nitro-1-phenylethyl)tetrahydro-4*H*-thiopyran-4-one (4q):**<sup>2</sup> 85% yield, 56.2 mg, White solid.  $^1\text{H}$  NMR (400 MHz,  $\text{CDCl}_3$ )  $\delta$  7.40-7.24 (m, 3H), 7.24-7.17 (m, 2H), 4.75 (dd,  $J = 12.8, 4.8$  Hz, 1H), 4.63 (dd,  $J = 12.8, 10.3$  Hz, 1H), 3.98 (td,  $J = 10.3, 4.8$  Hz, 1H), 3.11-3.01 (m,

1H), 3.01-2.91 (m, 2H), 2.91-2.75 (m, 2H), 2.62 (ddd,  $J = 14.2, 4.4, 1.8$  Hz, 1H), 2.46 (dd,  $J = 14.2, 9.6$  Hz, 1H).  $^{13}\text{C}$  NMR (100 MHz,  $\text{CDCl}_3$ )  $\delta$  209.5, 136.4, 129.3 (2C), 128.3, 128.1 (2C), 78.6, 54.9, 44.5, 43.4, 35.1, 31.6. IR (neat) 2900, 1702, 1545, 1427, 1380, 1291, 1112, 1080  $\text{cm}^{-1}$ . HPLC analysis; Daicel Chiralpack OD-H, Hexane/*i*-PrOH = 90/10, flow rate = 1.0 mL/min, 254 nm,  $t_{\text{R}} = 22.8$  min (minor, *R,S*), 25.6 min (major, *S,R*).

#### 4. Procedure for Enantioselective Michael Reaction of Nitroalkenes (**2**) with Aldehydes (**5**) Using Anthranilic Pyrrolidine Peptide-like Catalyst (**1o**) (Table 2 and Scheme 4).

To a solution of catalyst **1o** (15.0 mg, 0.025 mmol) in *i*-PrOH (250  $\mu\text{L}$ ) was added *N,N*-dimethylaniline (3.2  $\mu\text{L}$ , 0.025 mmol) at room temperature, and the reaction mixture was stirred at room temperature for 10 min. Then, *trans*- $\beta$ -nitrostyrene (**2a**) (37.3 mg, 0.25 mmol) and propionaldehyde (**5a**) (180.4  $\mu\text{L}$ , 2.5 mmol) was added to the mixture at 0  $^\circ\text{C}$ , and the mixture was stirred at 0  $^\circ\text{C}$  for 48 h. Saturated  $\text{NaHCO}_3$  aqueous solution (5 mL) was added to the mixture, and the product was extracted with AcOEt (15 mL  $\times$  3). The organic phase was washed with brine and dried over  $\text{Na}_2\text{SO}_4$ . The organic phase was concentrated under reduced pressure, and the crude product was purified by column chromatography (eluent: hexane/AcOEt = 10/1) to give the desired product **6a** (45.1 mg, 87% yield, dr = 95:5, 93% ee).

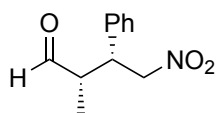

**(2*S*,3*R*)-2-Methyl-4-nitro-3-phenylbutanal (6a):**<sup>1</sup> 87% yield, 45.1 mg, Colorless oil.  $^1\text{H}$  NMR (400 MHz,  $\text{CDCl}_3$ )  $\delta$  9.72 (d,  $J = 1.6$  Hz, 1H), 7.38-7.27 (m, 3H), 7.19-7.13 (m, 2H), 4.80 (dd,  $J = 12.8, 5.6$  Hz, 1H), 4.68 (dd,  $J = 12.8, 9.6$  Hz, 1H), 3.81 (td,  $J = 9.6, 5.6$  Hz, 1H), 2.87-2.71 (m, 1H), 1.01 (d,  $J = 7.2$  Hz, 3H).  $^{13}\text{C}$  NMR (100 MHz,  $\text{CDCl}_3$ )  $\delta$  202.2, 136.5, 129.1 (2C), 128.1, 128.0 (2C), 78.1, 48.4, 44.0, 12.1. IR (neat) 2924, 1722, 1549, 1455, 1379, 1097  $\text{cm}^{-1}$ . HPLC analysis; Daicel Chiralpack OD-H, Hexane/*i*-PrOH = 90/10, flow rate = 1.0 mL/min, 210 nm,  $t_{\text{R}} = 26.6$  min (major, *S,R*), 39.5 min (minor, *R,S*).

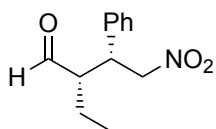

**(2*S*,3*R*)-2-Ethyl-4-nitro-3-phenylbutanal (6b):**<sup>1</sup> 93% yield, 51.4 mg, Colorless oil.  $^1\text{H}$  NMR (400 MHz,  $\text{CDCl}_3$ )  $\delta$  9.72 (d,  $J = 2.5$  Hz, 1H), 7.38-7.27 (m, 3H), 7.21-7.15 (m, 2H), 4.72 (dd,  $J = 12.8,$

5.3 Hz, 1H), 4.63 (dd,  $J = 12.8, 9.8$  Hz, 1H), 3.79 (td,  $J = 9.8, 5.3$  Hz, 1H), 2.73-2.63 (m, 1H), 1.57-1.44 (m, 2H), 0.84 (t,  $J = 7.6$  Hz, 3H).  $^{13}\text{C}$  NMR (100 MHz,  $\text{CDCl}_3$ )  $\delta$  203.2, 136.7, 129.0 (2C), 128.1, 127.9 (2C), 78.5, 54.9, 42.6, 20.3, 10.6. IR (neat) 2967, 1717, 1550, 1379, 1203, 1089  $\text{cm}^{-1}$ . HPLC analysis; Daicel Chiralpack OD-H, Hexane/*i*-PrOH = 90/10, flow rate = 0.7 mL/min, 210 nm,  $t_{\text{R}} = 26.9$  min (major, *S,R*), 33.6 min (minor, *R,S*).

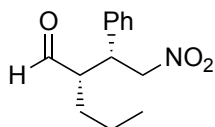

**(*S*)-2-((*R*)-2-Nitro-1-phenylethyl)pentanal (6c):**<sup>1</sup> 92% yield, 53.9 mg, Colorless oil.  $^1\text{H}$  NMR (400 MHz,  $\text{CDCl}_3$ )  $\delta$  9.70 (d,  $J = 3.2$  Hz, 1H), 7.39-7.27 (m, 3H), 7.21-7.14 (m, 2H), 4.71 (dd,  $J = 13.2, 5.6$  Hz, 1H), 4.64 (dd,  $J = 13.2, 9.6$  Hz, 1H), 3.78 (td,  $J = 9.6, 5.6$  Hz, 1H), 2.71 (tt,  $J = 9.6, 3.2$  Hz, 1H), 1.55-1.43 (m, 1H), 1.43-1.24 (m, 2H), 1.24-1.09 (m, 1H), 0.80 (t,  $J = 7.2$  Hz, 3H).  $^{13}\text{C}$  NMR (100 MHz,  $\text{CDCl}_3$ )  $\delta$  203.2, 136.7, 129.1 (2C), 128.1, 127.9 (2C), 78.4, 53.7, 43.1, 29.4, 19.7, 13.9. IR (neat) 2921, 1720, 1551, 1456, 1379, 1090  $\text{cm}^{-1}$ .  $[\alpha]_{\text{D}}^{25} = -39.6$  ( $c$  1.0,  $\text{CHCl}_3$ , 90% ee (*S*)). HPLC analysis; Daicel Chiralpack OD-H, Hexane/*i*-PrOH = 90/10, flow rate = 1.0 mL/min, 220 nm,  $t_{\text{R}} = 15.9$  min (major, *S,R*), 21.2 min (minor, *R,S*).

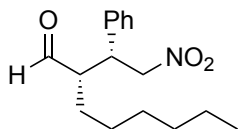

**(*S*)-2-((*R*)-2-Nitro-1-phenylethyl)octanal (6d):**<sup>1</sup> 97% yield, 67.4 mg, Colorless oil.  $^1\text{H}$  NMR (400 MHz,  $\text{CDCl}_3$ )  $\delta$  9.70 (d,  $J = 3.2$  Hz, 1H), 7.38-7.25 (m, 3H), 7.20-7.14 (m, 2H), 4.71 (dd,  $J = 13.0, 5.2$  Hz, 1H), 4.64 (dd,  $J = 13.0, 10.0$  Hz, 1H), 3.78 (td,  $J = 10.0, 5.2$  Hz, 1H), 2.75-2.64 (m, 1H), 1.54-1.06 (m, 10H), 0.82 (t,  $J = 7.2$  Hz, 3H).  $^{13}\text{C}$  NMR (100 MHz,  $\text{CDCl}_3$ )  $\delta$  203.3, 136.7, 129.1 (2C), 128.1, 128.0 (2C), 78.4, 53.8, 43.0, 31.3, 29.0, 27.3, 26.3, 22.4, 13.9. IR (neat) 2925, 1719, 1552, 1455, 1379, 1092  $\text{cm}^{-1}$ .  $[\alpha]_{\text{D}}^{25} = -39.0$  ( $c$  1.0,  $\text{CHCl}_3$ , 85% ee (*S*)). HPLC analysis; Daicel Chiralpack OD-H, Hexane/*i*-PrOH = 90/10, flow rate = 1.0 mL/min, 220 nm,  $t_{\text{R}} = 13.2$  min (major, *S,R*), 17.3 min (minor, *R,S*).

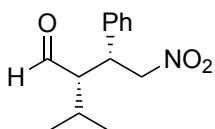

**(*2S,3R*)-2-Isopropyl-4-nitro-3-phenylbutanal (6e):**<sup>1</sup> >99% yield, 58.4 mg, Colorless oil.  $^1\text{H}$  NMR (400 MHz,  $\text{CDCl}_3$ )  $\delta$  9.61 (d,  $J = 2.8$  Hz, 1H), 7.38-7.25 (m, 3H), 7.23-7.16 (m, 2H), 4.67 (dd,  $J = 12.8, 4.4$  Hz, 1H), 4.57 (dd,  $J = 12.8, 10.4$  Hz, 1H), 3.90 (td,  $J = 10.4, 4.4$  Hz, 1H), 2.78



(ddd,  $J = 10.4, 4.4, 2.8$  Hz, 1H), 1.78-1.64 (m, 1H), 1.10 (d,  $J = 7.4$  Hz, 3H), 0.88 (d,  $J = 7.4$  Hz, 3H).  $^{13}\text{C}$  NMR (100 MHz,  $\text{CDCl}_3$ )  $\delta$  204.4, 137.0, 129.1 (2C), 128.1, 127.9 (2C), 79.0, 58.7, 41.9, 27.9, 21.6, 16.9. IR (neat) 2921, 1715, 1550, 1455, 1378, 1089  $\text{cm}^{-1}$ .  $[\alpha]_{\text{D}}^{25} = -69.8$  ( $c$  1.0,  $\text{CHCl}_3$ , 91% ee (*S*)). HPLC analysis; Daicel Chiralpack OD-H, Hexane/*i*-PrOH = 95/5, flow rate = 0.5 mL/min, 220 nm,  $t_{\text{R}} = 27.4$  min (minor, *R,S*), 28.9 min (major, *S,R*).

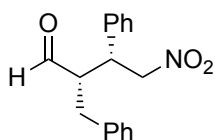

**(2*S*,3*R*)-2-Benzyl-4-nitro-3-phenylbutanal (6f):**<sup>1</sup> 93% yield, 65.6 mg, Colorless oil.  $^1\text{H}$  NMR (400 MHz,  $\text{CDCl}_3$ )  $\delta$  9.71 (d,  $J = 2.0$  Hz, 1H), 7.42-7.15 (m, 8H), 7.06-7.00 (m, 2H), 4.74 (dd,  $J = 13.2, 6.4$  Hz, 1H), 4.70 (dd,  $J = 13.2, 8.6$  Hz, 1H), 3.82 (td,  $J = 8.6, 6.4$  Hz, 1H), 3.16-3.07 (m, 1H), 2.80-2.70 (m, 2H).  $^{13}\text{C}$  NMR (100 MHz,  $\text{CDCl}_3$ )  $\delta$  203.0, 137.1, 136.6, 129.3 (2C), 128.8 (2C), 128.7 (2C), 128.3, 128.0 (2C), 126.9, 78.0, 55.3, 43.4, 34.2. IR (neat) 2922, 1721, 1550, 1454, 1378, 1090  $\text{cm}^{-1}$ . HPLC analysis; Daicel Chiralpack OD-H, Hexane/*i*-PrOH = 95/5, flow rate = 1.0 mL/min, 220 nm,  $t_{\text{R}} = 37.4$  min (major, *S,R*), 40.7 min (minor, *R,S*).

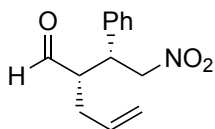

**(*S*)-2-((*R*)-2-Nitro-1-phenylethyl)pent-4-enal (6g):**<sup>1</sup> 87% yield, 50.9 mg, Colorless oil.  $^1\text{H}$  NMR (400 MHz,  $\text{CDCl}_3$ )  $\delta$  9.73 (d,  $J = 2.4$  Hz, 1H), 7.39-7.27 (m, 3H), 7.21-7.15 (m, 2H), 5.69-5.56 (m, 1H), 5.11-4.94 (m, 2H), 4.77 (dd,  $J = 13.2, 5.2$  Hz, 1H), 4.67 (dd,  $J = 13.2, 10.0$  Hz, 1H), 3.81 (td,  $J = 10.0, 5.2$  Hz, 1H), 2.90-2.81 (m, 1H), 2.27-2.18 (m, 2H).  $^{13}\text{C}$  NMR (100 MHz,  $\text{CDCl}_3$ )  $\delta$  202.7, 136.5, 132.9, 129.1 (2C), 128.2, 128.0 (2C), 118.8, 78.2, 52.9, 42.7, 31.7. IR (neat) 2920, 1722, 1550, 1454, 1379, 1089  $\text{cm}^{-1}$ . HPLC analysis; Daicel Chiralpack OD-H, Hexane/*i*-PrOH = 90/10, flow rate = 1.0 mL/min, 220 nm,  $t_{\text{R}} = 18.5$  min (major, *S,R*), 25.7 min (minor, *R,S*).

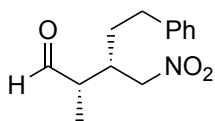

**(2*S*,3*S*)-2-Methyl-3-(nitromethyl)-5-phenylpentanal (6h):**<sup>9</sup> 96% yield, 56.4 mg, Colorless oil.  $^1\text{H}$  NMR (400 MHz,  $\text{CDCl}_3$ )  $\delta$  9.62 (s, 1H), 7.32-7.27 (m, 2H), 7.25-7.18 (m, 1H), 7.18-7.12 (m, 2H), 4.54 (dd,  $J = 12.8, 6.0$  Hz, 1H), 4.44 (dd,  $J = 12.8, 8.0$  Hz, 1H), 2.85-2.74 (m, 1H), 2.74-2.53

(m, 3H), 1.78 (q,  $J = 7.6$  Hz, 1H), 1.74-1.55 (m, 1H), 1.16 (d,  $J = 7.2$  Hz, 3H).  $^{13}\text{C}$  NMR (100 MHz,  $\text{CDCl}_3$ )  $\delta$  202.5, 140.4, 128.6 (2C), 128.2 (2C), 126.4, 76.7, 47.0, 36.7, 33.1, 30.2, 9.0. IR (neat) 2923, 1722, 1549, 1454, 1381, 1081  $\text{cm}^{-1}$ . HPLC analysis; Daicel Chiralpack AD-H, Hexane/EtOH = 90/10, flow rate = 1.0 mL/min, 210 nm,  $t_{\text{R}} = 15.5$  min (minor, *R,S*), 16.4 min (major, *S,R*).

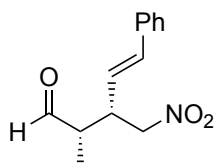

**(2*S*,3*S*,*E*)-2-Methyl-3-(nitromethyl)-5-phenylpent-4-enal (6i):**<sup>10</sup> 90% yield, 52.3 mg, Colorless oil.  $^1\text{H}$  NMR (400 MHz,  $\text{CDCl}_3$ )  $\delta$  9.67 (d,  $J = 0.8$  Hz, 1H), 7.38-7.20 (m, 5H), 6.54 (d,  $J = 16.0$  Hz, 1H), 5.95 (dd,  $J = 16.0, 9.6$  Hz, 1H), 4.63-4.47 (m, 2H), 3.56-3.44 (m, 1H), 2.63-2.54 (m, 1H), 1.20 (d,  $J = 7.2$  Hz, 3H).  $^{13}\text{C}$  NMR (100 MHz,  $\text{CDCl}_3$ )  $\delta$  202.1, 135.8, 135.1, 128.6 (2C), 128.1, 126.4 (2C), 123.5, 77.5, 47.2, 41.8, 10.8. IR (neat) 2931, 1721, 1549, 1450, 1379, 1073  $\text{cm}^{-1}$ . HPLC analysis; Daicel Chiralpack AD-H, Hexane/EtOH = 90/10, flow rate = 1.0 mL/min, 210 nm,  $t_{\text{R}} = 15.5$  min (minor, *R,S*), 16.4 min (major, *S,R*). The enantioselectivity of **6i** was determined after its derivatization to **6h**.

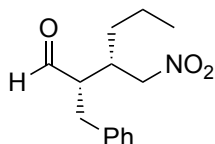

**(2*S*,3*S*)-2-Benzyl-3-(nitromethyl)hexanal (6j):**<sup>11</sup> >99% yield, 62.0 mg, Colorless oil.  $^1\text{H}$  NMR (400 MHz,  $\text{CDCl}_3$ )  $\delta$  9.68 (s, 1H), 7.35-7.26 (m, 2H), 7.26-7.14 (m, 3H), 4.45 (dd,  $J = 12.8, 6.8$  Hz, 1H), 4.39 (dd,  $J = 12.8, 6.8$  Hz, 1H), 3.06 (dd,  $J = 14.0, 8.8$  Hz, 1H), 2.92-2.80 (m, 1H), 2.80-2.66 (m, 2H), 1.52-1.23 (m, 4H), 0.89 (t,  $J = 7.2$  Hz, 3H).  $^{13}\text{C}$  NMR (100 MHz,  $\text{CDCl}_3$ )  $\delta$  202.5, 138.3, 129.0 (2C), 128.9 (2C), 126.9, 77.5, 54.2, 36.8, 31.5, 31.4, 20.2, 13.9. IR (neat) 2930, 1721, 1549, 1454, 1381, 1079  $\text{cm}^{-1}$ . HRMS (APCI)  $m/z$   $[\text{M}+\text{H}]^+$  calcd for  $\text{C}_{14}\text{H}_{20}\text{NO}_3$  250.1438; found 250.1439. HPLC analysis; Daicel Chiralpack OD-H, Hexane/*i*-PrOH = 90/10, flow rate = 1.0 mL/min, 220 nm,  $t_{\text{R}} = 17.9$  min (major, *S,R*), 19.6 min (minor, *R,S*).

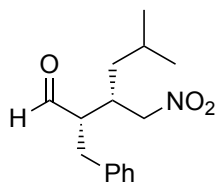

**(2*S*,3*S*)-2-Benzyl-5-methyl-3-(nitromethyl)hexanal (6k)**: 92% yield, 60.4 mg, Colorless oil.  $^1\text{H}$  NMR (400 MHz,  $\text{CDCl}_3$ )  $\delta$  9.70 (s, 1H), 7.35-7.28 (m, 2H), 7.26-7.17 (m, 3H), 4.45 (dd,  $J = 12.8, 6.8$  Hz, 1H), 4.40 (dd,  $J = 12.8, 7.2$  Hz, 1H), 3.07 (dd,  $J = 14.0, 8.8$  Hz, 1H), 2.91-2.83 (m, 1H), 2.83-2.68 (m, 2H), 1.65-1.50 (m, 1H), 1.38-1.19 (m, 2H), 0.90 (d,  $J = 6.8$  Hz, 3H), 0.82 (d,  $J = 6.8$  Hz, 3H).  $^{13}\text{C}$  NMR (100 MHz,  $\text{CDCl}_3$ )  $\delta$  202.3, 138.2, 128.9 (2C), 128.8 (2C), 126.8, 76.97, 54.2, 38.2, 34.8, 31.3, 25.2, 22.4, 22.1. IR (neat) 2928, 1721, 1549, 1468, 1382, 1081  $\text{cm}^{-1}$ . HRMS (APCI)  $m/z$   $[\text{M}+\text{H}]^+$  calcd for  $\text{C}_{15}\text{H}_{22}\text{NO}_3$  264.1594; found 264.1595. HPLC analysis; Daicel Chiralpack OD-H, Hexane/*i*-PrOH = 90/10, flow rate = 1.0 mL/min, 220 nm,  $t_R = 10.1$  min (major, *S,R*), 11.3 min (minor, *R,S*). The absolute configuration of **6k** was assigned from that of **6j** by analogy of the HPLC analysis.

## 5. Transformation of chiral Michael reaction adduct (**3a**) into $\beta$ -proline derivative (**8a**) (Scheme 7).

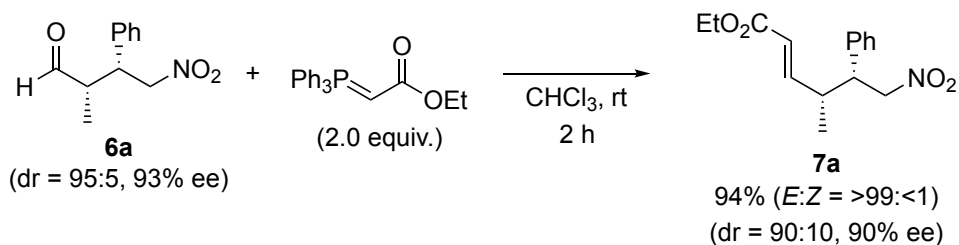

To a solution of **6a** (52.9 mg, 0.26 mmol) in  $\text{CHCl}_3$  (750  $\mu\text{L}$ ) was added triphenylphosphonium ethoxycarbonylmethylide (177.9 mg, 0.51 mmol), and the reaction mixture was stirred at room temperature for 2 h under argon atmosphere. The solvent was removed under reduced pressure and the crude mixture was purified by column chromatography (eluent: hexane/ $\text{AcOEt}$ =10:1) to give the desired product **5** (66.5 mg, 94% yield ( $E:Z = >99:<1$ , dr = 90:10, 90% ee)).

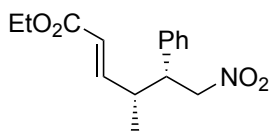

**Ethyl (4*R*,5*R*,*E*)-4-methyl-6-nitro-5-phenylhex-2-enoate (7a)**: 94% yield, 66.5 mg, Colorless oil.  $^1\text{H}$  NMR (400 MHz,  $\text{CDCl}_3$ )  $\delta$  7.37-7.24 (m, 3H), 7.21-7.14 (m, 2H), 6.86 (dd,  $J = 16.0, 9.8$  Hz, 1H), 5.92 (dd,  $J = 16.0, 0.4$  Hz, 1H), 4.64 (dd,  $J = 13.2, 5.2$  Hz, 1H), 4.57 (dd,  $J = 13.2, 10.4$  Hz,

1H), 4.21 (q,  $J = 7.2$  Hz, 2H), 3.37 (td,  $J = 10.4, 5.2$  Hz, 1H), 2.68-2.55 (m, 1H), 1.31 (t,  $J = 7.2$  Hz, 3H), 0.91 (d,  $J = 6.4$  Hz, 3H).  $^{13}\text{C}$  NMR (100 MHz,  $\text{CDCl}_3$ )  $\delta$  165.9, 149.8, 137.3, 128.8 (2C), 127.9 (2C), 127.9, 122.7, 79.1, 60.5, 48.9, 40.2, 18.1, 14.1. IR (neat) 2979, 1712, 1551, 1455, 1377, 1271, 1175, 1036  $\text{cm}^{-1}$ . HRMS (ESI)  $m/z$   $[\text{M}+\text{H}]^+$  calcd for  $\text{C}_{15}\text{H}_{20}\text{NO}_4$  278.1387; found 278.1385. HPLC analysis; Daicel Chiralpack AD-H, Hexane/EtOH = 90/10, flow rate = 1.0 mL/min, 230 nm,  $t_R = 8.6$  min (minor, *S,S*), 12.9 min (major, *R,R*).

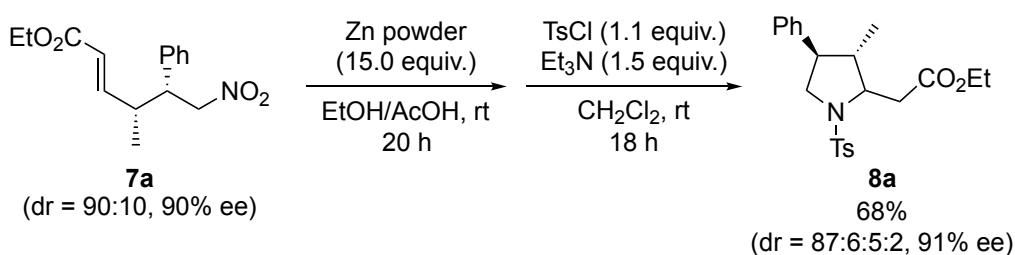

To a solution of **7a** (62.8 mg (dr = 90:10, 90% ee), 0.23 mmol) in EtOH (2.3 mL) and AcOH (518  $\mu\text{L}$ ) was added Zn powder (222.1 mg, 3.40 mmol) at  $-5$   $^\circ\text{C}$ , and the reaction mixture was stirred at room temperature for 20 h. The reaction mixture was filtered through Celite with EtOH and the organic layer was concentrated under reduced pressure. The residue was cooled to  $-5$   $^\circ\text{C}$  and basified with 1N NaOH aqueous solution (5.0 mL) to pH 10, and the product was extracted with  $\text{CH}_2\text{Cl}_2$  (10 mL  $\times$  3). The combined extracts were dried over  $\text{Na}_2\text{SO}_4$ . The organic phase was concentrated under reduced pressure to give the crude product. To a solution of the crude product and  $\text{Et}_3\text{N}$  (47.3  $\mu\text{L}$ , 0.34 mmol) in  $\text{CH}_2\text{Cl}_2$  (1.1 mL) was added TsCl (47.5 mg, 0.25 mmol) at room temperature, and then stirred at room temperature for 18 h. 1N HCl aqueous solution (10 mL) was added to the mixture, and the product was extracted with  $\text{CHCl}_3$  (10 mL  $\times$  3). The organic products were washed with brine (10 mL) and dried over  $\text{Na}_2\text{SO}_4$ . The organic phase was concentrated under reduced pressure and the crude product was purified by silica gel column chromatography (eluent: hexane/AcOEt=8:1) to give the desired product **8a** (61.5 mg, 68% yield (dr = 87:6:5:2), 91% ee).

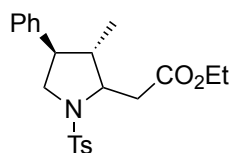

**Ethyl 2-((3*S*,4*R*)-3-methyl-4-phenyl-1-tosylpyrrolidin-2-yl)acetate (**8a**):** 68% yield, 61.5 mg, Colorless oil.  $^1\text{H}$  NMR (400 MHz,  $\text{CDCl}_3$ )  $\delta$  7.80 (d,  $J = 8.4$  Hz, 2H), 7.37 (d,  $J = 8.4$  Hz, 2H), 7.31-7.25 (m, 2H), 7.25-7.18 (m, 1H), 7.12-7.06 (m, 2H), 4.18 (q,  $J = 7.2$  Hz, 2H), 3.76 (dd,  $J = 12.0, 7.6$  Hz, 1H), 3.63 (ddd,  $J = 8.8, 6.8, 4.0$  Hz, 1H), 3.46 (t,  $J = 12.0$  Hz, 1H), 3.00 (dd,  $J = 16.4, 4.0$  Hz, 1H), 2.81 (dd,  $J = 16.4, 6.8$  Hz, 1H), 2.47 (s, 3H), 2.37-2.24 (m, 1H), 2.12 (td,  $J = 11.2, 7.6$

Hz, 1H), 1.30 (t,  $J = 7.2$  Hz, 3H), 0.79 (d,  $J = 6.8$  Hz, 3H).  $^{13}\text{C}$  NMR (100 MHz,  $\text{CDCl}_3$ )  $\delta$  171.4, 143.8, 138.4, 134.8, 129.9 (2C), 128.8 (2C), 127.8 (2C), 127.6 (2C), 127.4, 63.9, 60.7, 55.4, 51.5, 47.0, 39.6, 21.7, 15.8, 14.3. IR (neat) 2963, 1730, 1454, 1344, 1289, 1161, 1092, 1030  $\text{cm}^{-1}$ . HRMS (ESI)  $m/z$   $[\text{M}+\text{H}]^+$  calcd for  $\text{C}_{22}\text{H}_{28}\text{NO}_4\text{S}$  402.1734; found 402.1733. HPLC analysis; Daicel Chiralpack OJ-H, Hexane/*i*-PrOH = 90/10, flow rate = 0.6 mL/min, 210 nm,  $t_{\text{R}} = 31.0$  min (minor), 34.9 min (major).

## 6. DFT Calculation Studies for Transition State of Enantioselective Michael Reaction of Nitroalkenes with Carbonyl compounds Using Chiral Pyrrolidyl Anthranilic Acid Catalyst

All calculation were performed with the Gaussian 16 package.<sup>12</sup> As a preliminary study, various TS models were explored at the B3LYP/6-311G\* level according to the SCRf method based on PCM (*i*-PrOH). The promising TS models were further optimized at the M06-02X/6-31G\* level according to the SCRf method based on PCM (*i*-PrOH). Frequency analyses were also carried out to identify the stationary points (TS: one imaginary frequency). Single-point energy calculations of the optimized structures were evaluated at the M06-02X/6-31G\* level according to the SCRf method based on PCM (*i*-PrOH).

### < Transition State model of Enantioselective Michael Reaction of $\beta$ -Nitrostyrene with Cyclohexanone using Catalyst **1e** >

To identify the promising TS model for the enantioselective Michael reaction of  $\beta$ -nitrostyrene with cyclohexanone using catalyst **1e**, various TS models consisting of **1e**-enamine generated from catalyst **1e** and cyclohexanone, and  $\beta$ -nitrostyrene were explored based on previous studies and the results in Scheme 5. The energetically favored TS models (**TS-A–TS-H**) were identified at the B3LYP/6-311G\*\* level according to the SCRf method based on PCM (*i*-PrOH). The TS models (**TS-A–TS-H**) were further optimized at the M06-02X/6-31G\* level according to the SCRf method based on PCM (*i*-PrOH) to find the most energetically favored TS model (**TS-E**).

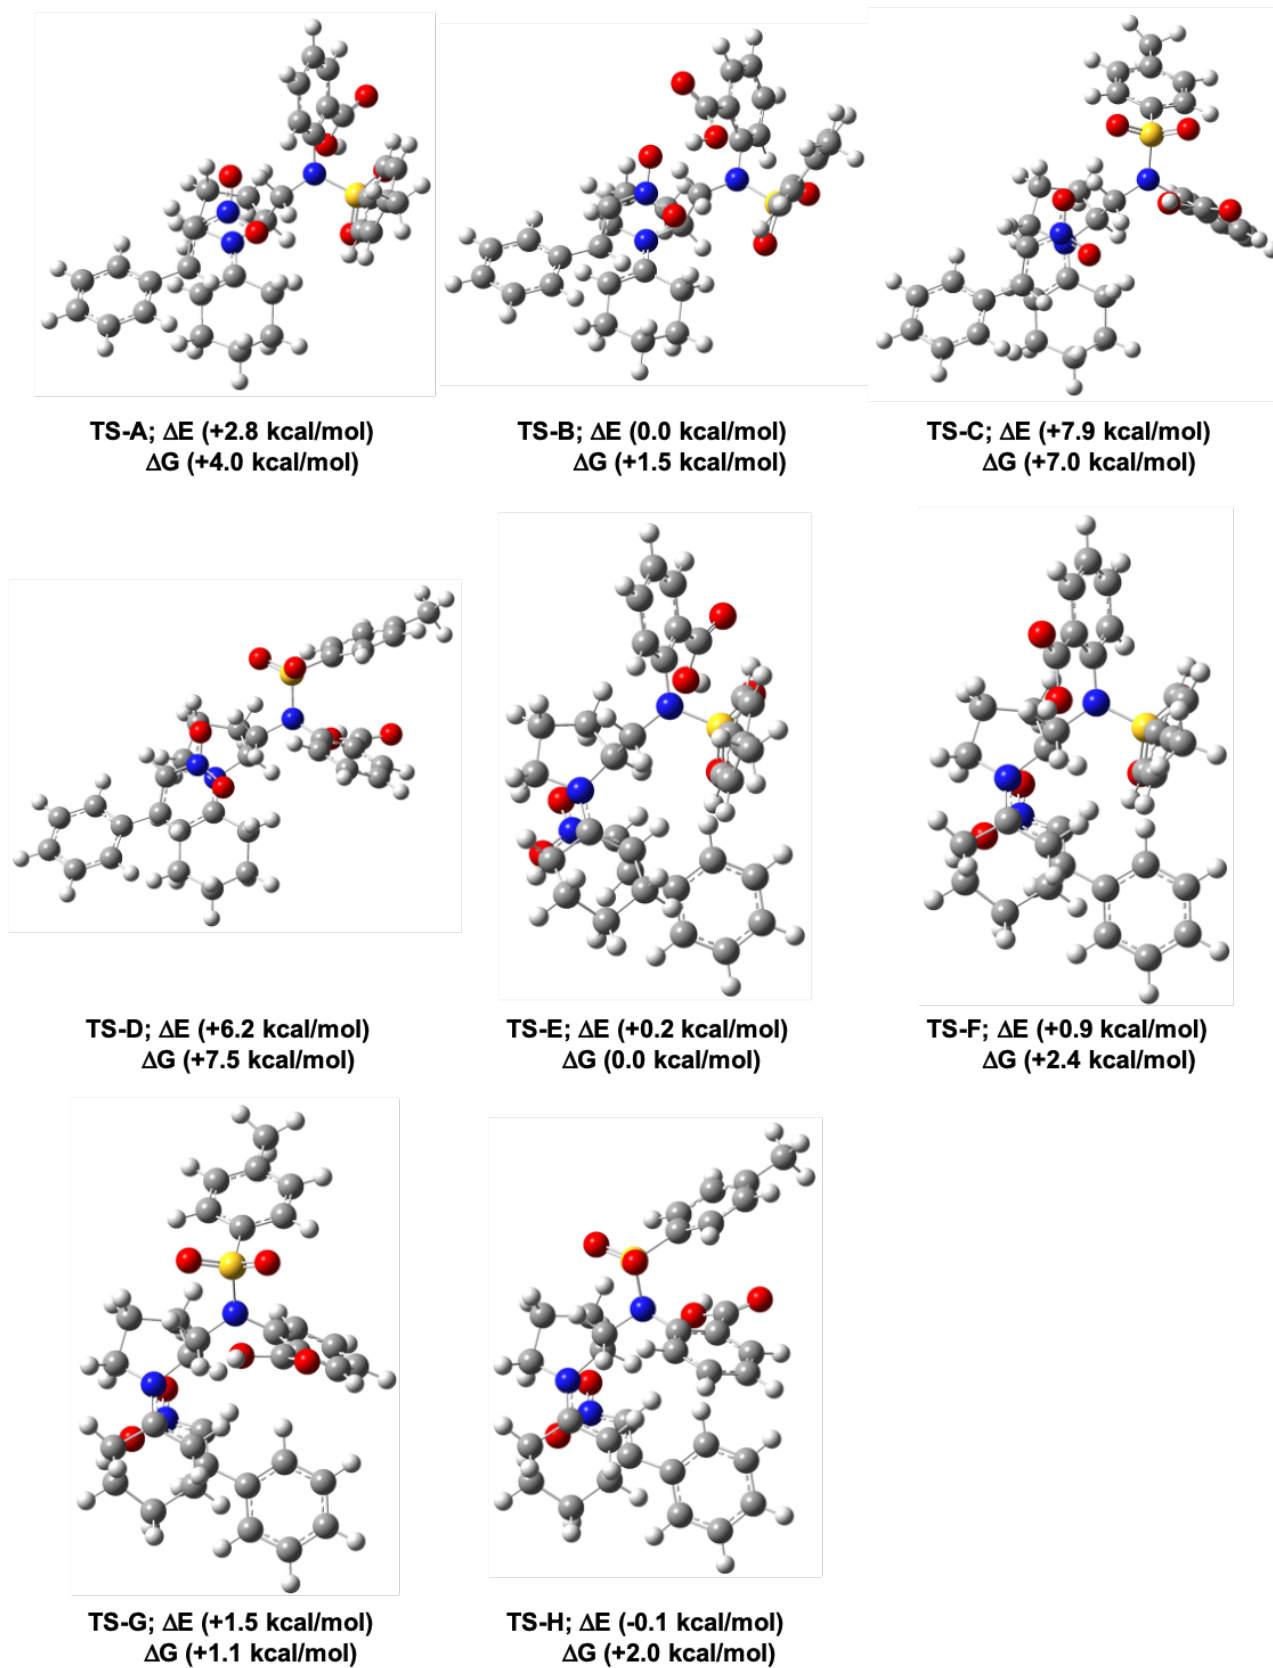

**Figure S2.** Optimized geometries for the transition states of Michael reaction of  $\beta$ -nitrostyrene with cyclohexanone using catalyst **1e**.

|                                                             |        |        |                         |           |           |    |    |   |           |           |           |
|-------------------------------------------------------------|--------|--------|-------------------------|-----------|-----------|----|----|---|-----------|-----------|-----------|
| TS-A                                                        |        |        |                         |           |           | 30 | 1  | 0 | -0.404206 | 0.357847  | -0.294126 |
| M062X/6-31G*                                                |        |        |                         |           |           | 31 | 6  | 0 | 3.690329  | 0.304369  | 0.74245   |
| E(RM062X) = -2292.656867 Hartree                            |        |        |                         |           |           | 32 | 6  | 0 | 5.115151  | -0.037628 | 0.963819  |
| EE+Thermal Free Energy of Correction = -2292.066382 Hartree |        |        |                         |           |           | 33 | 6  | 0 | 6.081154  | 0.971605  | 0.87953   |
| -----                                                       |        |        |                         |           |           | 34 | 6  | 0 | 7.424591  | 0.69202   | 1.12004   |
| Center                                                      | Atomic | Atomic | Coordinates (Angstroms) |           |           | 35 | 6  | 0 | 7.820572  | -0.60275  | 1.442316  |
| Number                                                      | Number | Type   | X                       | Y         | Z         | 36 | 6  | 0 | 6.866236  | -1.617686 | 1.523815  |
| -----                                                       |        |        |                         |           |           | 37 | 6  | 0 | 5.526215  | -1.338004 | 1.286177  |
| 1                                                           | 7      | 0      | 1.446291                | -1.423335 | -0.997572 | 38 | 1  | 0 | 5.772053  | 1.983937  | 0.633241  |
| 2                                                           | 6      | 0      | 2.183867                | -0.416374 | -1.490816 | 39 | 1  | 0 | 8.15965   | 1.487373  | 1.054311  |
| 3                                                           | 6      | 0      | 3.573196                | -0.40759  | -1.326746 | 40 | 1  | 0 | 8.866673  | -0.823611 | 1.626475  |
| 4                                                           | 6      | 0      | 4.441044                | 0.546332  | -2.117814 | 41 | 1  | 0 | 7.168928  | -2.630215 | 1.769628  |
| 5                                                           | 6      | 0      | 3.716195                | 1.830724  | -2.513808 | 42 | 1  | 0 | 4.794639  | -2.13987  | 1.344648  |
| 6                                                           | 6      | 0      | 2.366568                | 1.490893  | -3.137433 | 43 | 6  | 0 | 2.729582  | -0.253436 | 1.582998  |
| 7                                                           | 6      | 0      | 1.482417                | 0.769867  | -2.119568 | 44 | 7  | 0 | 1.492786  | 0.336077  | 1.724026  |
| 8                                                           | 1      | 0      | 4.044989                | -1.355519 | -1.089606 | 45 | 8  | 0 | 0.693339  | -0.146132 | 2.55566   |
| 9                                                           | 1      | 0      | 5.349291                | 0.775448  | -1.549925 | 46 | 8  | 0 | 1.192131  | 1.341775  | 1.048578  |
| 10                                                          | 1      | 0      | 4.781324                | 0.035304  | -3.029049 | 47 | 1  | 0 | 3.493036  | 1.32282   | 0.418613  |
| 11                                                          | 1      | 0      | 3.555849                | 2.463684  | -1.630818 | 48 | 1  | 0 | 2.880491  | -1.109784 | 2.222551  |
| 12                                                          | 1      | 0      | 4.334424                | 2.405645  | -3.209254 | 49 | 7  | 0 | -2.211648 | -0.769573 | -0.364481 |
| 13                                                          | 1      | 0      | 1.851007                | 2.392954  | -3.479218 | 50 | 6  | 0 | -2.995627 | -0.995611 | 0.813144  |
| 14                                                          | 1      | 0      | 2.519634                | 0.852288  | -4.015889 | 51 | 6  | 0 | -2.614836 | -0.396432 | 2.018335  |
| 15                                                          | 1      | 0      | 1.23931                 | 1.463102  | -1.305643 | 52 | 6  | 0 | -3.38977  | -0.565402 | 3.160832  |
| 16                                                          | 1      | 0      | 0.536603                | 0.464527  | -2.57502  | 53 | 6  | 0 | -4.570844 | -1.301131 | 3.105034  |
| 17                                                          | 6      | 0      | 2.049021                | -2.671388 | -0.492875 | 54 | 6  | 0 | -4.957521 | -1.885916 | 1.905709  |
| 18                                                          | 6      | 0      | 0.860014                | -3.427361 | 0.084065  | 55 | 6  | 0 | -4.170417 | -1.762899 | 0.758204  |
| 19                                                          | 6      | 0      | -0.259577               | -3.069655 | -0.895114 | 56 | 1  | 0 | -1.702739 | 0.193969  | 2.060128  |
| 20                                                          | 6      | 0      | -0.016869               | -1.586139 | -1.194709 | 57 | 1  | 0 | -3.07715  | -0.101932 | 4.090444  |
| 21                                                          | 1      | 0      | 2.819071                | -2.454507 | 0.245212  | 58 | 1  | 0 | -5.18555  | -1.420958 | 3.99018   |
| 22                                                          | 1      | 0      | 2.507901                | -3.21414  | -1.330754 | 59 | 1  | 0 | -5.872406 | -2.464125 | 1.837945  |
| 23                                                          | 1      | 0      | 0.638405                | -3.049243 | 1.088098  | 60 | 6  | 0 | -4.673043 | -2.484404 | -0.452825 |
| 24                                                          | 1      | 0      | 1.047276                | -4.499505 | 0.153413  | 61 | 8  | 0 | -5.846152 | -2.719255 | -0.63738  |
| 25                                                          | 1      | 0      | -1.268082               | -3.229727 | -0.50776  | 62 | 8  | 0 | -3.714625 | -2.929836 | -1.272557 |
| 26                                                          | 1      | 0      | -0.151618               | -3.655369 | -1.812814 | 63 | 1  | 0 | -4.158857 | -3.39213  | -2.001686 |
| 27                                                          | 1      | 0      | -0.294893               | -1.332807 | -2.218972 | 64 | 16 | 0 | -2.86296  | 0.332923  | -1.451806 |
| 28                                                          | 6      | 0      | -0.749827               | -0.676846 | -0.21038  | 65 | 8  | 0 | -4.271241 | -0.00315  | -1.612218 |
| 29                                                          | 1      | 0      | -0.505033               | -0.99509  | 0.804527  | 66 | 8  | 0 | -1.966549 | 0.337352  | -2.603108 |

|                                                             |   |   |           |           |           |    |    |   |           |           |           |           |
|-------------------------------------------------------------|---|---|-----------|-----------|-----------|----|----|---|-----------|-----------|-----------|-----------|
| 67                                                          | 6 | 0 | -2.755337 | 1.909734  | -0.654589 | 15 | 1  | 0 | -1.169783 | 1.449177  | 1.530771  |           |
| 68                                                          | 6 | 0 | -3.727647 | 2.258455  | 0.284813  | 16 | 1  | 0 | -0.61462  | 0.400575  | 2.819002  |           |
| 69                                                          | 6 | 0 | -3.594694 | 3.459902  | 0.966515  | 17 | 6  | 0 | -2.093017 | -2.622129 | 0.552452  |           |
| 70                                                          | 6 | 0 | -2.508765 | 4.312327  | 0.725854  | 18 | 6  | 0 | -0.909349 | -3.500876 | 0.165339  |           |
| 71                                                          | 6 | 0 | -1.553556 | 3.937079  | -0.222229 | 19 | 6  | 0 | 0.121687  | -3.159485 | 1.243229  |           |
| 72                                                          | 6 | 0 | -1.667436 | 2.737019  | -0.917322 | 20 | 6  | 0 | -0.038042 | -1.646022 | 1.422335  |           |
| 73                                                          | 1 | 0 | -4.572445 | 1.601565  | 0.467122  | 21 | 1  | 0 | -2.73558  | -2.371321 | -0.291929 |           |
| 74                                                          | 1 | 0 | -4.344838 | 3.745091  | 1.698199  | 22 | 1  | 0 | -2.710381 | -3.095516 | 1.328274  |           |
| 75                                                          | 1 | 0 | -0.710605 | 4.59155   | -0.421417 | 23 | 1  | 0 | -0.544455 | -3.220207 | -0.827959 |           |
| 76                                                          | 1 | 0 | -0.935475 | 2.450003  | -1.665506 | 24 | 1  | 0 | -1.174635 | -4.558432 | 0.143084  |           |
| 77                                                          | 6 | 0 | -2.39364  | 5.616649  | 1.468385  | 25 | 1  | 0 | 1.147052  | -3.423497 | 0.971432  |           |
| 78                                                          | 1 | 0 | -1.417491 | 6.078005  | 1.310271  | 26 | 1  | 0 | -0.12788  | -3.673305 | 2.175958  |           |
| 79                                                          | 1 | 0 | -2.538385 | 5.467357  | 2.541349  | 27 | 1  | 0 | 0.18836   | -1.336969 | 2.443586  |           |
| 80                                                          | 1 | 0 | -3.161116 | 6.319139  | 1.129549  | 28 | 6  | 0 | 0.837017  | -0.856004 | 0.448884  |           |
| -----                                                       |   |   |           |           |           |    | 29 | 1 | 0         | 0.715615  | -1.275769 | -0.552649 |
| -----                                                       |   |   |           |           |           |    | 30 | 1 | 0         | 0.510376  | 0.186123  | 0.38536   |
| <b>TS-B</b>                                                 |   |   |           |           |           |    | 31 | 6 | 0         | -3.534782 | 0.50937   | -0.732416 |
| M062X/6-31G*                                                |   |   |           |           |           |    | 32 | 6 | 0         | -4.947179 | 0.200767  | -1.036835 |
| E(RM062X) = -2292.661327 Hartree                            |   |   |           |           |           |    | 33 | 6 | 0         | -5.902998 | 1.218255  | -0.930842 |
| EE+Thermal Free Energy of Correction = -2292.070424 Hartree |   |   |           |           |           |    | 34 | 6 | 0         | -7.236051 | 0.976058  | -1.25404  |
| -----                                                       |   |   |           |           |           |    | 35 | 6 | 0         | -7.631028 | -0.288508 | -1.680569 |
| Center Atomic Atomic Coordinates (Angstroms)                |   |   |           |           |           |    | 36 | 6 | 0         | -6.686898 | -1.311391 | -1.78398  |
| Number Number Type X Y Z                                    |   |   |           |           |           |    | 37 | 6 | 0         | -5.356921 | -1.069531 | -1.465246 |
| -----                                                       |   |   |           |           |           |    | 38 | 1 | 0         | -5.593633 | 2.207384  | -0.604076 |
| 1                                                           | 7 | 0 | -1.466536 | -1.408552 | 1.106158  | 39 | 1  | 0 | -7.963674 | 1.776493  | -1.171208 |           |
| 2                                                           | 6 | 0 | -2.208051 | -0.393515 | 1.597417  | 40 | 1  | 0 | -8.669553 | -0.480493 | -1.928709 |           |
| 3                                                           | 6 | 0 | -3.580582 | -0.347415 | 1.374119  | 41 | 1  | 0 | -6.990512 | -2.300472 | -2.110455 |           |
| 4                                                           | 6 | 0 | -4.4711   | 0.613859  | 2.125829  | 42 | 1  | 0 | -4.633194 | -1.876901 | -1.539868 |           |
| 5                                                           | 6 | 0 | -3.737896 | 1.871315  | 2.586967  | 43 | 6  | 0 | -2.533295 | -0.024658 | -1.528661 |           |
| 6                                                           | 6 | 0 | -2.434924 | 1.482194  | 3.276529  | 44 | 7  | 0 | -1.288807 | 0.565894  | -1.57426  |           |
| 7                                                           | 6 | 0 | -1.50998  | 0.749815  | 2.303637  | 45 | 8  | 0 | -0.480533 | 0.156697  | -2.443652 |           |
| 8                                                           | 1 | 0 | -4.06612  | -1.254687 | 1.031143  | 46 | 8  | 0 | -0.984107 | 1.493393  | -0.805622 |           |
| 9                                                           | 1 | 0 | -5.337634 | 0.875011  | 1.508547  | 47 | 1  | 0 | -3.334275 | 1.489322  | -0.308438 |           |
| 10                                                          | 1 | 0 | -4.880125 | 0.097616  | 3.005667  | 48 | 1  | 0 | -2.657439 | -0.827992 | -2.238589 |           |
| 11                                                          | 1 | 0 | -3.512164 | 2.516994  | 1.727714  | 49 | 7  | 0 | 2.258428  | -0.929974 | 0.823203  |           |
| 12                                                          | 1 | 0 | -4.378591 | 2.449852  | 3.258767  | 50 | 6  | 0 | 3.222963  | -1.632342 | 0.028858  |           |
| 13                                                          | 1 | 0 | -1.915699 | 2.362702  | 3.665183  | 51 | 6  | 0 | 4.065417  | -2.521969 | 0.703908  |           |
| 14                                                          | 1 | 0 | -2.657243 | 0.833784  | 4.132968  | 52 | 6  | 0 | 5.023718  | -3.260002 | 0.020768  |           |



|                                                             |        |        |                         |           |           |    |    |   |           |           |           |           |
|-------------------------------------------------------------|--------|--------|-------------------------|-----------|-----------|----|----|---|-----------|-----------|-----------|-----------|
| 53                                                          | 6      | 0      | 5.132041                | -3.14871  | -1.363584 | 1  | 7  | 0 | -1.44444  | -0.747165 | 0.99843   |           |
| 54                                                          | 6      | 0      | 4.278236                | -2.293849 | -2.045781 | 2  | 6  | 0 | -2.266303 | 0.257676  | 1.337276  |           |
| 55                                                          | 6      | 0      | 3.338346                | -1.509445 | -1.369344 | 3  | 6  | 0 | -3.64571  | 0.031237  | 1.456971  |           |
| 56                                                          | 1      | 0      | 3.946465                | -2.622318 | 1.776058  | 4  | 6  | 0 | -4.540089 | 1.061148  | 2.113854  |           |
| 57                                                          | 1      | 0      | 5.66932                 | -3.937505 | 0.569215  | 5  | 6  | 0 | -4.011133 | 2.486117  | 1.973906  |           |
| 58                                                          | 1      | 0      | 5.86586                 | -3.733282 | -1.907281 | 6  | 6  | 0 | -2.549591 | 2.533059  | 2.405335  |           |
| 59                                                          | 1      | 0      | 4.325031                | -2.207296 | -3.12583  | 7  | 6  | 0 | -1.698553 | 1.655303  | 1.487156  |           |
| 60                                                          | 6      | 0      | 2.46294                 | -0.657993 | -2.239536 | 8  | 1  | 0 | -3.953105 | -0.9972   | 1.61749   |           |
| 61                                                          | 16     | 0      | 2.813948                | 0.295753  | 1.820971  | 9  | 1  | 0 | -5.552842 | 0.983399  | 1.704182  |           |
| 62                                                          | 8      | 0      | 4.112638                | -0.1179   | 2.334019  | 10 | 1  | 0 | -4.630877 | 0.819739  | 3.181736  |           |
| 63                                                          | 8      | 0      | 1.717316                | 0.575741  | 2.74309   | 11 | 1  | 0 | -4.091353 | 2.820887  | 0.931102  |           |
| 64                                                          | 6      | 0      | 3.050506                | 1.71545   | 0.799065  | 12 | 1  | 0 | -4.618211 | 3.168286  | 2.575927  |           |
| 65                                                          | 8      | 0      | 2.174974                | -0.985139 | -3.371423 | 13 | 1  | 0 | -2.161039 | 3.554774  | 2.378155  |           |
| 66                                                          | 8      | 0      | 2.041346                | 0.464748  | -1.66784  | 14 | 1  | 0 | -2.464508 | 2.180922  | 3.44061   |           |
| 67                                                          | 1      | 0      | 1.19288                 | 0.718993  | -2.105668 | 15 | 1  | 0 | -1.662969 | 2.103575  | 0.488897  |           |
| 68                                                          | 6      | 0      | 4.260412                | 1.859489  | 0.124588  | 16 | 1  | 0 | -0.670326 | 1.610424  | 1.854993  |           |
| 69                                                          | 6      | 0      | 4.402432                | 2.911054  | -0.77109  | 17 | 6  | 0 | -1.875939 | -2.159393 | 0.996924  |           |
| 70                                                          | 6      | 0      | 3.351846                | 3.805846  | -1.005323 | 18 | 6  | 0 | -0.674446 | -2.885827 | 0.411162  |           |
| 71                                                          | 6      | 0      | 2.148215                | 3.630419  | -0.314903 | 19 | 6  | 0 | 0.4913    | -2.119507 | 1.035395  |           |
| 72                                                          | 6      | 0      | 1.987214                | 2.588516  | 0.590314  | 20 | 6  | 0 | 0.037744  | -0.657889 | 0.954733  |           |
| 73                                                          | 6      | 0      | 3.526983                | 4.955315  | -1.961923 | 21 | 1  | 0 | -2.782999 | -2.28528  | 0.41124   |           |
| 74                                                          | 1      | 0      | 5.071798                | 1.162139  | 0.305645  | 22 | 1  | 0 | -2.075581 | -2.475256 | 2.03048   |           |
| 75                                                          | 1      | 0      | 5.341493                | 3.040074  | -1.301154 | 23 | 1  | 0 | -0.672403 | -2.76914  | -0.678369 |           |
| 76                                                          | 1      | 0      | 1.325672                | 4.317361  | -0.490612 | 24 | 1  | 0 | -0.674627 | -3.949553 | 0.651166  |           |
| 77                                                          | 1      | 0      | 1.05308                 | 2.451285  | 1.125354  | 25 | 1  | 0 | 1.442241  | -2.264469 | 0.519176  |           |
| 78                                                          | 1      | 0      | 3.958262                | 5.819141  | -1.445846 | 26 | 1  | 0 | 0.620539  | -2.418695 | 2.079726  |           |
| 79                                                          | 1      | 0      | 2.569763                | 5.265859  | -2.385468 | 27 | 1  | 0 | 0.396052  | -0.089481 | 1.818647  |           |
| 80                                                          | 1      | 0      | 4.201057                | 4.688871  | -2.778785 | 28 | 6  | 0 | 0.493054  | 0.023339  | -0.335973 |           |
| -----                                                       |        |        |                         |           |           |    | 29 | 1 | 0         | 0.2237    | -0.584096 | -1.202323 |
| -----                                                       |        |        |                         |           |           |    | 30 | 1 | 0         | 0.007179  | 0.989088  | -0.472807 |
| <b>TS-C</b>                                                 |        |        |                         |           |           |    | 31 | 6 | 0         | -4.246033 | 0.014393  | -0.604684 |
| M062X/6-31G*                                                |        |        |                         |           |           |    | 32 | 6 | 0         | -5.600239 | -0.564657 | -0.422983 |
| E(RM062X) = -2292.648752 Hartree                            |        |        |                         |           |           |    | 33 | 6 | 0         | -6.716668 | 0.278407  | -0.457074 |
| EE+Thermal Free Energy of Correction = -2292.061607 Hartree |        |        |                         |           |           |    | 34 | 6 | 0         | -8.003406 | -0.239341 | -0.327012 |
| -----                                                       |        |        |                         |           |           |    | 35 | 6 | 0         | -8.190408 | -1.607858 | -0.154648 |
| Center                                                      | Atomic | Atomic | Coordinates (Angstroms) |           |           | 36 | 6  | 0 | -7.0839   | -2.456866 | -0.113019 |           |
| Number                                                      | Number | Type   | X                       | Y         | Z         | 37 | 6  | 0 | -5.800749 | -1.939781 | -0.244977 |           |
| -----                                                       |        |        |                         |           |           |    | 38 | 1 | 0         | -6.571992 | 1.346444  | -0.596275 |

|    |    |   |           |           |           |                                                             |        |        |                         |           |           |
|----|----|---|-----------|-----------|-----------|-------------------------------------------------------------|--------|--------|-------------------------|-----------|-----------|
| 39 | 1  | 0 | -8.857937 | 0.428486  | -0.359825 | 77                                                          | 1      | 0      | 3.2658                  | -3.214466 | -0.676528 |
| 40 | 1  | 0 | -9.191371 | -2.012911 | -0.049574 | 78                                                          | 1      | 0      | 8.105166                | -3.431236 | 1.14782   |
| 41 | 1  | 0 | -7.222223 | -3.524013 | 0.026235  | 79                                                          | 1      | 0      | 6.894423                | -4.120248 | 2.234162  |
| 42 | 1  | 0 | -4.946772 | -2.611139 | -0.202737 | 80                                                          | 1      | 0      | 7.611495                | -2.535395 | 2.584494  |
| 43 | 6  | 0 | -3.349247 | -0.65191  | -1.440555 | -----                                                       |        |        |                         |           |           |
| 44 | 7  | 0 | -2.257974 | 0.009566  | -1.955813 |                                                             |        |        |                         |           |           |
| 45 | 8  | 0 | -1.505883 | -0.595118 | -2.748513 | <b>TS-D</b>                                                 |        |        |                         |           |           |
| 46 | 8  | 0 | -2.049923 | 1.201442  | -1.643932 | M062X/6-31G*                                                |        |        |                         |           |           |
| 47 | 1  | 0 | -4.202007 | 1.099384  | -0.647383 | E(RM062X) = -2292.651443 Hartree                            |        |        |                         |           |           |
| 48 | 1  | 0 | -3.441387 | -1.675893 | -1.76933  | EE+Thermal Free Energy of Correction = -2292.060731 Hartree |        |        |                         |           |           |
| 49 | 7  | 0 | 1.949224  | 0.221753  | -0.323999 | -----                                                       |        |        |                         |           |           |
| 50 | 6  | 0 | 2.480215  | 1.365997  | 0.353343  | Center                                                      | Atomic | Atomic | Coordinates (Angstroms) |           |           |
| 51 | 6  | 0 | 2.603139  | 2.62654   | -0.25858  | Number                                                      | Number | Type   | X                       | Y         | Z         |
| 52 | 6  | 0 | 3.178482  | 3.676301  | 0.458459  | -----                                                       |        |        |                         |           |           |
| 53 | 6  | 0 | 3.600258  | 3.499279  | 1.772254  | 1                                                           | 7      | 0      | 1.663845                | -0.245807 | -1.396998 |
| 54 | 6  | 0 | 3.472317  | 2.253229  | 2.378079  | 2                                                           | 6      | 0      | 2.458642                | 0.830398  | -1.3535   |
| 55 | 6  | 0 | 2.928199  | 1.18971   | 1.662717  | 3                                                           | 6      | 0      | 3.853233                | 0.67344   | -1.321965 |
| 56 | 6  | 0 | 2.185869  | 2.940452  | -1.66258  | 4                                                           | 6      | 0      | 4.758212                | 1.871966  | -1.492599 |
| 57 | 1  | 0 | 3.285051  | 4.636357  | -0.034567 | 5                                                           | 6      | 0      | 4.110661                | 3.154073  | -0.975184 |
| 58 | 1  | 0 | 4.033677  | 4.330753  | 2.316915  | 6                                                           | 6      | 0      | 2.757348                | 3.336069  | -1.652085 |
| 59 | 1  | 0 | 3.808434  | 2.10153   | 3.397972  | 7                                                           | 6      | 0      | 1.801972                | 2.196326  | -1.290455 |
| 60 | 1  | 0 | 2.859688  | 0.197815  | 2.099415  | 8                                                           | 1      | 0      | 4.244093                | -0.265636 | -1.700397 |
| 61 | 16 | 0 | 2.92104   | -0.482228 | -1.47925  | 9                                                           | 1      | 0      | 5.710295                | 1.682991  | -0.984392 |
| 62 | 8  | 0 | 3.577265  | 0.553836  | -2.273578 | 10                                                          | 1      | 0      | 5.00887                 | 2.00117   | -2.554407 |
| 63 | 8  | 0 | 2.11227   | -1.503699 | -2.135104 | 11                                                          | 1      | 0      | 3.964738                | 3.096481  | 0.111351  |
| 64 | 6  | 0 | 4.19503   | -1.279943 | -0.537461 | 12                                                          | 1      | 0      | 4.761799                | 4.010412  | -1.172575 |
| 65 | 8  | 0 | 2.695964  | 3.818554  | -2.319974 | 13                                                          | 1      | 0      | 2.295538                | 4.286309  | -1.370678 |
| 66 | 8  | 0 | 1.153909  | 2.212469  | -2.095777 | 14                                                          | 1      | 0      | 2.903809                | 3.359436  | -2.738775 |
| 67 | 1  | 0 | 0.956085  | 2.481244  | -3.00719  | 15                                                          | 1      | 0      | 1.401227                | 2.348629  | -0.284047 |
| 68 | 6  | 0 | 5.268699  | -0.524328 | -0.06806  | 16                                                          | 1      | 0      | 0.953869                | 2.207537  | -1.980418 |
| 69 | 6  | 0 | 6.24386   | -1.151566 | 0.69684   | 17                                                          | 6      | 0      | 2.170331                | -1.599084 | -1.691702 |
| 70 | 6  | 0 | 6.167607  | -2.519485 | 0.985272  | 18                                                          | 6      | 0      | 0.928281                | -2.491775 | -1.659898 |
| 71 | 6  | 0 | 5.086692  | -3.253049 | 0.487445  | 19                                                          | 6      | 0      | -0.208662               | -1.534858 | -2.028    |
| 72 | 6  | 0 | 4.09584   | -2.642738 | -0.274743 | 20                                                          | 6      | 0      | 0.187412                | -0.240411 | -1.324029 |
| 73 | 6  | 0 | 7.250665  | -3.189923 | 1.787919  | 21                                                          | 1      | 0      | 2.923547                | -1.889575 | -0.959717 |
| 74 | 1  | 0 | 5.338661  | 0.532811  | -0.304016 | 22                                                          | 1      | 0      | 2.640399                | -1.58755  | -2.683252 |
| 75 | 1  | 0 | 7.082246  | -0.572596 | 1.072599  | 23                                                          | 1      | 0      | 0.769489                | -2.893868 | -0.655195 |
| 76 | 1  | 0 | 5.021663  | -4.316922 | 0.694345  | 24                                                          | 1      | 0      | 1.021217                | -3.332157 | -2.348829 |

|    |    |   |           |           |           |                                                             |        |        |                         |           |           |
|----|----|---|-----------|-----------|-----------|-------------------------------------------------------------|--------|--------|-------------------------|-----------|-----------|
| 25 | 1  | 0 | -1.189284 | -1.876214 | -1.691608 | 63                                                          | 8      | 0      | -1.661541               | -2.608963 | 0.787077  |
| 26 | 1  | 0 | -0.243623 | -1.371322 | -3.109315 | 64                                                          | 6      | 0      | -3.994442               | -1.371902 | 0.624579  |
| 27 | 1  | 0 | -0.233843 | 0.63626   | -1.81882  | 65                                                          | 8      | 0      | -4.886533               | 1.235612  | -1.745042 |
| 28 | 6  | 0 | -0.178063 | -0.230539 | 0.157832  | 66                                                          | 8      | 0      | -2.872875               | 0.326839  | -2.092492 |
| 29 | 1  | 0 | 0.211471  | -1.131193 | 0.636577  | 67                                                          | 1      | 0      | -3.357146               | -0.037403 | -2.851827 |
| 30 | 1  | 0 | 0.295983  | 0.623807  | 0.643495  | 68                                                          | 6      | 0      | -4.962346               | -0.6372   | 1.303645  |
| 31 | 6  | 0 | 4.245564  | 0.093563  | 0.729423  | 69                                                          | 6      | 0      | -6.246291               | -0.576217 | 0.775131  |
| 32 | 6  | 0 | 5.518306  | -0.638801 | 0.516349  | 70                                                          | 6      | 0      | -6.566038               | -1.235035 | -0.415858 |
| 33 | 6  | 0 | 6.731284  | 0.034505  | 0.707     | 71                                                          | 6      | 0      | -5.576136               | -1.98512  | -1.062657 |
| 34 | 6  | 0 | 7.947716  | -0.625373 | 0.54762   | 72                                                          | 6      | 0      | -4.286896               | -2.056949 | -0.552667 |
| 35 | 6  | 0 | 7.970138  | -1.971026 | 0.193945  | 73                                                          | 6      | 0      | -7.940018               | -1.108721 | -1.015074 |
| 36 | 6  | 0 | 6.768413  | -2.655205 | 0.008288  | 74                                                          | 1      | 0      | -4.706541               | -0.122671 | 2.224209  |
| 37 | 6  | 0 | 5.555601  | -1.996356 | 0.168582  | 75                                                          | 1      | 0      | -7.010216               | -0.002552 | 1.290935  |
| 38 | 1  | 0 | 6.718532  | 1.07958   | 1.003389  | 76                                                          | 1      | 0      | -5.820714               | -2.5154   | -1.978128 |
| 39 | 1  | 0 | 8.876122  | -0.086115 | 0.704157  | 77                                                          | 1      | 0      | -3.516384               | -2.636713 | -1.05041  |
| 40 | 1  | 0 | 8.915988  | -2.486913 | 0.066416  | 78                                                          | 1      | 0      | -8.694989               | -0.936117 | -0.245549 |
| 41 | 1  | 0 | 6.776937  | -3.705802 | -0.262743 | 79                                                          | 1      | 0      | -8.211151               | -2.002874 | -1.580099 |
| 42 | 1  | 0 | 4.630911  | -2.547534 | 0.024667  | 80                                                          | 1      | 0      | -7.965614               | -0.258368 | -1.704518 |
| 43 | 6  | 0 | 3.197318  | -0.551145 | 1.388776  | -----                                                       |        |        |                         |           |           |
| 44 | 7  | 0 | 2.208567  | 0.204594  | 1.978517  |                                                             |        |        |                         |           |           |
| 45 | 8  | 0 | 1.366981  | -0.352153 | 2.711313  | <b>TS-E</b>                                                 |        |        |                         |           |           |
| 46 | 8  | 0 | 2.161048  | 1.436467  | 1.763181  | M062X/6-31G*                                                |        |        |                         |           |           |
| 47 | 1  | 0 | 4.354292  | 1.14752   | 0.967596  | E(RM062X) = -2292.660945 Hartree                            |        |        |                         |           |           |
| 48 | 1  | 0 | 3.124989  | -1.610924 | 1.581406  | EE+Thermal Free Energy of Correction = -2292.072746 Hartree |        |        |                         |           |           |
| 49 | 7  | 0 | -1.631441 | -0.142554 | 0.35623   | -----                                                       |        |        |                         |           |           |
| 50 | 6  | 0 | -2.152525 | 1.167221  | 0.626942  | Center                                                      | Atomic | Atomic | Coordinates (Angstroms) |           |           |
| 51 | 6  | 0 | -1.671583 | 1.876537  | 1.730085  | Number                                                      | Number | Type   | X                       | Y         | Z         |
| 52 | 6  | 0 | -2.191043 | 3.129112  | 2.03691   | -----                                                       |        |        |                         |           |           |
| 53 | 6  | 0 | -3.21304  | 3.670168  | 1.258059  | 1                                                           | 6      | 0      | -1.591862               | -1.839368 | -2.928698 |
| 54 | 6  | 0 | -3.697979 | 2.963452  | 0.165077  | 2                                                           | 1      | 0      | -1.449307               | -1.383868 | -3.911099 |
| 55 | 6  | 0 | -3.161212 | 1.718683  | -0.175235 | 3                                                           | 6      | 0      | -0.282204               | -2.681447 | -1.083901 |
| 56 | 1  | 0 | -0.885696 | 1.429441  | 2.334403  | 4                                                           | 1      | 0      | 0.694568                | -3.024581 | -0.738169 |
| 57 | 1  | 0 | -1.808394 | 3.675497  | 2.892121  | 5                                                           | 6      | 0      | -0.474661               | -1.182473 | -0.862107 |
| 58 | 1  | 0 | -3.629694 | 4.641192  | 1.501862  | 6                                                           | 1      | 0      | -0.81239                | -0.960401 | 0.149924  |
| 59 | 1  | 0 | -4.493967 | 3.367496  | -0.450683 | 7                                                           | 7      | 0      | -1.50525                | -0.831355 | -1.856764 |
| 60 | 6  | 0 | -3.742175 | 1.063717  | -1.389856 | 8                                                           | 6      | 0      | -2.224861               | 0.30021   | -1.823302 |
| 61 | 16 | 0 | -2.334313 | -1.390632 | 1.232376  | 9                                                           | 6      | 0      | -2.305576               | 1.061114  | -0.64779  |
| 62 | 8  | 0 | -2.370399 | -1.087985 | 2.661795  | 10                                                          | 1      | 0      | -1.516963               | 0.934372  | 0.088278  |

|    |   |   |           |           |           |                                                             |    |   |          |           |           |
|----|---|---|-----------|-----------|-----------|-------------------------------------------------------------|----|---|----------|-----------|-----------|
| 11 | 6 | 0 | -3.020201 | 0.668063  | -3.059057 | 49                                                          | 7  | 0 | 1.769504 | -0.547614 | -0.059834 |
| 12 | 1 | 0 | -3.905238 | 0.026825  | -3.101381 | 50                                                          | 6  | 0 | 2.862502 | -1.448665 | -0.20921  |
| 13 | 1 | 0 | -2.41903  | 0.438613  | -3.943568 | 51                                                          | 6  | 0 | 3.109982 | -2.460897 | 0.733314  |
| 14 | 6 | 0 | -3.426989 | 2.142436  | -3.085004 | 52                                                          | 6  | 0 | 4.218535 | -3.292848 | 0.560795  |
| 15 | 1 | 0 | -2.548263 | 2.761453  | -3.30436  | 53                                                          | 6  | 0 | 5.049328 | -3.15855  | -0.545011 |
| 16 | 1 | 0 | -4.141117 | 2.299986  | -3.898002 | 54                                                          | 6  | 0 | 4.792555 | -2.162092 | -1.483228 |
| 17 | 6 | 0 | -4.010859 | 2.571924  | -1.743708 | 55                                                          | 6  | 0 | 3.714357 | -1.301681 | -1.305263 |
| 18 | 1 | 0 | -4.365556 | 3.605735  | -1.787733 | 56                                                          | 6  | 0 | 2.274916 | -2.728677 | 1.947284  |
| 19 | 1 | 0 | -4.880264 | 1.944781  | -1.505851 | 57                                                          | 1  | 0 | 4.406379 | -4.05596  | 1.307836  |
| 20 | 6 | 0 | -2.946144 | 2.430935  | -0.659074 | 58                                                          | 1  | 0 | 5.895054 | -3.825106 | -0.671222 |
| 21 | 1 | 0 | -2.168747 | 3.19106   | -0.820285 | 59                                                          | 1  | 0 | 5.440888 | -2.0395   | -2.344035 |
| 22 | 1 | 0 | -3.368519 | 2.640439  | 0.329737  | 60                                                          | 1  | 0 | 3.530288 | -0.495837 | -2.009291 |
| 23 | 1 | 0 | -2.590635 | -2.293279 | -2.895978 | 61                                                          | 16 | 0 | 1.821756 | 0.603141  | 1.13632   |
| 24 | 1 | 0 | -1.059799 | -3.224016 | -0.539809 | 62                                                          | 8  | 0 | 2.692791 | 0.088233  | 2.184281  |
| 25 | 6 | 0 | -0.489342 | -2.847586 | -2.59239  | 63                                                          | 8  | 0 | 0.438408 | 0.96669   | 1.42541   |
| 26 | 1 | 0 | 0.428083  | -2.604072 | -3.137088 | 64                                                          | 6  | 0 | 2.609066 | 2.00701   | 0.396055  |
| 27 | 1 | 0 | -0.780229 | -3.862597 | -2.865955 | 65                                                          | 8  | 0 | 2.710372 | -3.284651 | 2.929809  |
| 28 | 6 | 0 | -3.67036  | -0.181265 | 0.461648  | 66                                                          | 8  | 0 | 0.988386 | -2.371485 | 1.838582  |
| 29 | 1 | 0 | -4.515618 | 0.152705  | -0.133283 | 67                                                          | 1  | 0 | 0.555981 | -2.613861 | 2.673848  |
| 30 | 6 | 0 | -3.349193 | -1.533997 | 0.341069  | 68                                                          | 6  | 0 | 3.99862  | 2.005173  | 0.268146  |
| 31 | 1 | 0 | -2.757595 | -2.099258 | 1.046143  | 69                                                          | 6  | 0 | 4.610194 | 3.074185  | -0.37189  |
| 32 | 7 | 0 | -3.767237 | -2.251262 | -0.753451 | 70                                                          | 6  | 0 | 3.855901 | 4.138932  | -0.882772 |
| 33 | 8 | 0 | -4.450987 | -1.693358 | -1.639647 | 71                                                          | 6  | 0 | 2.46612  | 4.110194  | -0.74028  |
| 34 | 8 | 0 | -3.454803 | -3.457853 | -0.854188 | 72                                                          | 6  | 0 | 1.831838 | 3.047755  | -0.103083 |
| 35 | 6 | 0 | -3.524436 | 0.464502  | 1.788587  | 73                                                          | 6  | 0 | 4.540561 | 5.303239  | -1.547358 |
| 36 | 6 | 0 | -3.325927 | 1.668578  | 4.311952  | 74                                                          | 1  | 0 | 4.584429 | 1.186617  | 0.67428   |
| 37 | 6 | 0 | -4.53684  | 1.309832  | 2.256384  | 75                                                          | 1  | 0 | 5.691074 | 3.088209  | -0.475659 |
| 38 | 6 | 0 | -2.403376 | 0.240086  | 2.597242  | 76                                                          | 1  | 0 | 1.871396 | 4.930649  | -1.130057 |
| 39 | 6 | 0 | -2.305405 | 0.837912  | 3.848003  | 77                                                          | 1  | 0 | 0.753554 | 3.027431  | 0.019346  |
| 40 | 6 | 0 | -4.441173 | 1.904578  | 3.512346  | 78                                                          | 1  | 0 | 4.952641 | 5.982628  | -0.794644 |
| 41 | 1 | 0 | -5.406601 | 1.494423  | 1.631257  | 79                                                          | 1  | 0 | 3.844194 | 5.871535  | -2.166497 |
| 42 | 1 | 0 | -1.585467 | -0.376848 | 2.234161  | 80                                                          | 1  | 0 | 5.369887 | 4.965289  | -2.172967 |
| 43 | 1 | 0 | -1.425473 | 0.663139  | 4.458681  | -----                                                       |    |   |          |           |           |
| 44 | 1 | 0 | -5.236809 | 2.553781  | 3.863011  |                                                             |    |   |          |           |           |
| 45 | 1 | 0 | -3.246205 | 2.13586   | 5.287985  | <b>TS-F</b>                                                 |    |   |          |           |           |
| 46 | 6 | 0 | 0.789594  | -0.354033 | -1.131682 | M062X/6-31G*                                                |    |   |          |           |           |
| 47 | 1 | 0 | 0.527606  | 0.70715   | -1.206756 | E(RM062X) = -2292.659832 Hartree                            |    |   |          |           |           |
| 48 | 1 | 0 | 1.2453    | -0.641225 | -2.083658 | EE+Thermal Free Energy of Correction = -2292.068942 Hartree |    |   |          |           |           |

| -----  |        |        |                         |           |           | 35 | 6  | 0 | 3.930122  | 1.22814   | -1.232824 |
|--------|--------|--------|-------------------------|-----------|-----------|----|----|---|-----------|-----------|-----------|
| Center | Atomic | Atomic | Coordinates (Angstroms) |           |           | 36 | 6  | 0 | 3.957855  | 3.447871  | -2.943909 |
| Number | Number | Type   | X                       | Y         | Z         | 37 | 6  | 0 | 4.914471  | 2.214423  | -1.103743 |
| -----  |        |        |                         |           |           | 38 | 6  | 0 | 2.950709  | 1.374864  | -2.222803 |
| 1      | 6      | 0      | 1.666227                | -3.008585 | 1.653727  | 39 | 6  | 0 | 2.964802  | 2.475919  | -3.070823 |
| 2      | 1      | 0      | 1.384403                | -3.036638 | 2.708565  | 40 | 6  | 0 | 4.931468  | 3.315354  | -1.957216 |
| 3      | 6      | 0      | 0.616006                | -2.992608 | -0.520323 | 41 | 1  | 0 | 5.673743  | 2.111315  | -0.3329   |
| 4      | 1      | 0      | -0.295868               | -3.181375 | -1.090533 | 42 | 1  | 0 | 2.153147  | 0.642126  | -2.309114 |
| 5      | 6      | 0      | 0.700938                | -1.544775 | -0.042508 | 43 | 1  | 0 | 2.193646  | 2.580559  | -3.827218 |
| 6      | 1      | 0      | 1.118359                | -0.888478 | -0.805485 | 44 | 1  | 0 | 5.704114  | 4.069421  | -1.848044 |
| 7      | 7      | 0      | 1.602859                | -1.63512  | 1.122463  | 45 | 1  | 0 | 3.96613   | 4.307743  | -3.605679 |
| 8      | 6      | 0      | 2.211446                | -0.577935 | 1.681295  | 46 | 6  | 0 | -0.640483 | -0.968327 | 0.432813  |
| 9      | 6      | 0      | 2.338336                | 0.627675  | 0.977458  | 47 | 1  | 0 | -0.476555 | -0.028887 | 0.971483  |
| 10     | 1      | 0      | 1.657962                | 0.799324  | 0.147946  | 48 | 1  | 0 | -1.120405 | -1.651693 | 1.136691  |
| 11     | 6      | 0      | 2.849397                | -0.762177 | 3.042734  | 49 | 7  | 0 | -1.573388 | -0.758308 | -0.683273 |
| 12     | 1      | 0      | 3.796427                | -1.29309  | 2.907511  | 50 | 6  | 0 | -2.749317 | -1.562826 | -0.84721  |
| 13     | 1      | 0      | 2.208021                | -1.406627 | 3.650281  | 51 | 6  | 0 | -2.782419 | -2.386843 | -1.974187 |
| 14     | 6      | 0      | 3.080703                | 0.56338   | 3.770524  | 52 | 6  | 0 | -3.871032 | -3.210628 | -2.234704 |
| 15     | 1      | 0      | 2.11962                 | 0.96485   | 4.115082  | 53 | 6  | 0 | -4.957051 | -3.214359 | -1.364186 |
| 16     | 1      | 0      | 3.688677                | 0.378775  | 4.66055   | 54 | 6  | 0 | -4.94796  | -2.37913  | -0.255838 |
| 17     | 6      | 0      | 3.742092                | 1.584057  | 2.850928  | 55 | 6  | 0 | -3.861127 | -1.541925 | 0.02193   |
| 18     | 1      | 0      | 3.966009                | 2.50724   | 3.393297  | 56 | 1  | 0 | -1.931392 | -2.359378 | -2.645604 |
| 19     | 1      | 0      | 4.699335                | 1.184891  | 2.490265  | 57 | 1  | 0 | -3.867088 | -3.846167 | -3.113492 |
| 20     | 6      | 0      | 2.817729                | 1.881783  | 1.673164  | 58 | 1  | 0 | -5.810429 | -3.85646  | -1.551399 |
| 21     | 1      | 0      | 1.94662                 | 2.445522  | 2.036143  | 59 | 1  | 0 | -5.794523 | -2.348421 | 0.420385  |
| 22     | 1      | 0      | 3.313323                | 2.53329   | 0.945401  | 60 | 6  | 0 | -4.050962 | -0.662078 | 1.220389  |
| 23     | 1      | 0      | 2.698821                | -3.367757 | 1.558914  | 61 | 16 | 0 | -1.506552 | 0.693312  | -1.496981 |
| 24     | 1      | 0      | 1.483213                | -3.212826 | -1.148187 | 62 | 8  | 0 | -2.163747 | 0.496292  | -2.780706 |
| 25     | 6      | 0      | 0.695312                | -3.80462  | 0.776333  | 63 | 8  | 0 | -0.111832 | 1.122162  | -1.43393  |
| 26     | 1      | 0      | -0.286854               | -3.866864 | 1.254076  | 64 | 6  | 0 | -2.471878 | 1.828266  | -0.547761 |
| 27     | 1      | 0      | 1.05144                 | -4.822251 | 0.610922  | 65 | 8  | 0 | -5.132019 | -0.475811 | 1.732734  |
| 28     | 6      | 0      | 3.955946                | 0.049846  | -0.333704 | 66 | 8  | 0 | -2.933461 | -0.105634 | 1.694056  |
| 29     | 1      | 0      | 4.682731                | 0.089074  | 0.472706  | 67 | 1  | 0 | -3.186107 | 0.484207  | 2.423771  |
| 30     | 6      | 0      | 3.735294                | -1.214519 | -0.880279 | 68 | 6  | 0 | -3.854885 | 1.839982  | -0.723873 |
| 31     | 1      | 0      | 3.284565                | -1.407848 | -1.842373 | 69 | 6  | 0 | -4.631415 | 2.596212  | 0.144423  |
| 32     | 7      | 0      | 4.078671                | -2.344596 | -0.177324 | 70 | 6  | 0 | -4.044667 | 3.337793  | 1.177696  |
| 33     | 8      | 0      | 4.609879                | -2.241142 | 0.950021  | 71 | 6  | 0 | -2.652375 | 3.319562  | 1.315528  |
| 34     | 8      | 0      | 3.853727                | -3.469388 | -0.674563 | 72 | 6  | 0 | -1.856591 | 2.564952  | 0.459775  |

|                                                             |        |        |                         |           |           |    |    |   |           |           |           |           |
|-------------------------------------------------------------|--------|--------|-------------------------|-----------|-----------|----|----|---|-----------|-----------|-----------|-----------|
| 73                                                          | 6      | 0      | -4.901812               | 4.161906  | 2.100731  | 21 | 1  | 0 | 3.710361  | 1.03482   | 2.429863  |           |
| 74                                                          | 1      | 0      | -4.308021               | 1.262555  | -1.523481 | 22 | 1  | 0 | 4.490882  | 1.212228  | 0.872366  |           |
| 75                                                          | 1      | 0      | -5.710687               | 2.608135  | 0.025064  | 23 | 1  | 0 | 1.662446  | -3.979502 | 0.1411    |           |
| 76                                                          | 1      | 0      | -2.186631               | 3.900868  | 2.105537  | 24 | 1  | 0 | -0.206081 | -2.397342 | -1.508169 |           |
| 77                                                          | 1      | 0      | -0.776803               | 2.543809  | 0.568471  | 25 | 6  | 0 | -0.468723 | -3.495984 | 0.336704  |           |
| 78                                                          | 1      | 0      | -5.21002                | 5.089178  | 1.607808  | 26 | 1  | 0 | -1.151865 | -3.473685 | 1.191499  |           |
| 79                                                          | 1      | 0      | -4.361522               | 4.428824  | 3.010709  | 27 | 1  | 0 | -0.666624 | -4.408194 | -0.227362 |           |
| 80                                                          | 1      | 0      | -5.809202               | 3.620494  | 2.378314  | 28 | 6  | 0 | 3.484828  | -0.513684 | -1.16116  |           |
| -----                                                       |        |        |                         |           |           |    | 29 | 1 | 0         | 4.405668  | -0.991027 | -0.838785 |
| -----                                                       |        |        |                         |           |           |    | 30 | 6 | 0         | 2.58634   | -1.336699 | -1.838604 |
| <b>TS-G</b>                                                 |        |        |                         |           |           |    | 31 | 1 | 0         | 1.78272   | -0.994532 | -2.474117 |
| M062X/6-31G*                                                |        |        |                         |           |           |    | 32 | 7 | 0         | 2.663169  | -2.703704 | -1.706112 |
| E(RM062X) = -2292.658556 Hartree                            |        |        |                         |           |           |    | 33 | 8 | 0         | 3.553135  | -3.210127 | -0.989751 |
| EE+Thermal Free Energy of Correction = -2292.071067 Hartree |        |        |                         |           |           |    | 34 | 8 | 0         | 1.83559   | -3.425251 | -2.302915 |
| -----                                                       |        |        |                         |           |           |    | 35 | 6 | 0         | 3.609143  | 0.903398  | -1.579138 |
| Center                                                      | Atomic | Atomic | Coordinates (Angstroms) |           |           | 36 | 6  | 0 | 3.914707  | 3.559226  | -2.425971 |           |
| Number                                                      | Number | Type   | X                       | Y         | Z         | 37 | 6  | 0 | 4.881815  | 1.473114  | -1.695949 |           |
| -----                                                       |        |        |                         |           |           |    | 38 | 6 | 0         | 2.488357  | 1.689366  | -1.877602 |
| 1                                                           | 6      | 0      | 0.985565                | -3.437381 | 0.814033  | 39 | 6  | 0 | 2.640734  | 3.004124  | -2.301074 |           |
| 2                                                           | 1      | 0      | 1.104706                | -3.835729 | 1.82368   | 40 | 6  | 0 | 5.034631  | 2.791171  | -2.120137 |           |
| 3                                                           | 6      | 0      | -0.62814                | -2.231311 | -0.513311 | 41 | 1  | 0 | 5.756143  | 0.872562  | -1.459618 |           |
| 4                                                           | 1      | 0      | -1.667083               | -1.906343 | -0.613922 | 42 | 1  | 0 | 1.487388  | 1.275842  | -1.768535 |           |
| 5                                                           | 6      | 0      | 0.21966                 | -1.201031 | 0.227771  | 43 | 1  | 0 | 1.762169  | 3.599418  | -2.527815 |           |
| 6                                                           | 1      | 0      | 0.602357                | -0.437044 | -0.450473 | 44 | 1  | 0 | 6.029013  | 3.215987  | -2.209596 |           |
| 7                                                           | 7      | 0      | 1.333582                | -2.005375 | 0.761403  | 45 | 1  | 0 | 4.030665  | 4.586871  | -2.753977 |           |
| 8                                                           | 6      | 0      | 2.486096                | -1.489444 | 1.213641  | 46 | 6  | 0 | -0.504572 | -0.532541 | 1.404363  |           |
| 9                                                           | 6      | 0      | 2.866434                | -0.181232 | 0.883157  | 47 | 1  | 0 | 0.196543  | 0.074876  | 1.986391  |           |
| 10                                                          | 1      | 0      | 2.083322                | 0.506208  | 0.578169  | 48 | 1  | 0 | -0.920689 | -1.291329 | 2.06936   |           |
| 11                                                          | 6      | 0      | 3.405071                | -2.400739 | 2.001126  | 49 | 7  | 0 | -1.608036 | 0.308871  | 0.938031  |           |
| 12                                                          | 1      | 0      | 3.900508                | -3.077486 | 1.298917  | 50 | 6  | 0 | -1.327252 | 1.477184  | 0.161654  |           |
| 13                                                          | 1      | 0      | 2.796879                | -3.021285 | 2.665303  | 51 | 6  | 0 | -1.088903 | 2.735271  | 0.742819  |           |
| 14                                                          | 6      | 0      | 4.439737                | -1.632877 | 2.825386  | 52 | 6  | 0 | -0.861267 | 3.834526  | -0.086303 |           |
| 15                                                          | 1      | 0      | 3.948409                | -1.168429 | 3.689112  | 53 | 6  | 0 | -0.851613 | 3.697473  | -1.47042  |           |
| 16                                                          | 1      | 0      | 5.176538                | -2.339438 | 3.217178  | 54 | 6  | 0 | -1.089516 | 2.452081  | -2.04513  |           |
| 17                                                          | 6      | 0      | 5.105926                | -0.543866 | 1.991834  | 55 | 6  | 0 | -1.337102 | 1.350836  | -1.228473 |           |
| 18                                                          | 1      | 0      | 5.891695                | -0.042899 | 2.564473  | 56 | 6  | 0 | -1.119163 | 3.020064  | 2.212739  |           |
| 19                                                          | 1      | 0      | 5.587451                | -0.996622 | 1.114942  | 57 | 1  | 0 | -0.699428 | 4.801356  | 0.377052  |           |
| 20                                                          | 6      | 0      | 4.054735                | 0.471733  | 1.551485  | 58 | 1  | 0 | -0.671082 | 4.564072  | -2.097439 |           |

|                                                             |        |        |                         |           |           |    |   |   |          |           |           |
|-------------------------------------------------------------|--------|--------|-------------------------|-----------|-----------|----|---|---|----------|-----------|-----------|
| 59                                                          | 1      | 0      | -1.094006               | 2.336011  | -3.123724 | 7  | 7 | 0 | 2.085122 | -2.009523 | 0.056815  |
| 60                                                          | 1      | 0      | -1.55488                | 0.376786  | -1.657344 | 8  | 6 | 0 | 3.050862 | -1.335776 | 0.695019  |
| 61                                                          | 16     | 0      | -3.135785               | 0.176185  | 1.582823  | 9  | 6 | 0 | 2.932267 | 0.045442  | 0.917015  |
| 62                                                          | 8      | 0      | -3.604848               | 1.513082  | 1.932182  | 10 | 1 | 0 | 1.932216 | 0.469186  | 0.914883  |
| 63                                                          | 8      | 0      | -3.078765               | -0.874316 | 2.592698  | 11 | 6 | 0 | 4.305642 | -2.094328 | 1.075448  |
| 64                                                          | 6      | 0      | -4.137807               | -0.392204 | 0.235925  | 12 | 1 | 0 | 4.897354 | -2.25562  | 0.169986  |
| 65                                                          | 8      | 0      | -1.337095               | 4.122043  | 2.661171  | 13 | 1 | 0 | 4.014356 | -3.082019 | 1.444713  |
| 66                                                          | 8      | 0      | -0.835204               | 1.969832  | 2.990413  | 14 | 6 | 0 | 5.137172 | -1.375478 | 2.139338  |
| 67                                                          | 1      | 0      | -0.893336               | 2.268071  | 3.912773  | 15 | 1 | 0 | 4.643461 | -1.46749  | 3.1145    |
| 68                                                          | 6      | 0      | -4.669015               | 0.537227  | -0.654617 | 16 | 1 | 0 | 6.108888 | -1.869565 | 2.22429   |
| 69                                                          | 6      | 0      | -5.400338               | 0.07674   | -1.744158 | 17 | 6 | 0 | 5.295038 | 0.103493  | 1.804379  |
| 70                                                          | 6      | 0      | -5.60869                | -1.29122  | -1.947669 | 18 | 1 | 0 | 5.948248 | 0.598091  | 2.528951  |
| 71                                                          | 6      | 0      | -5.065387               | -2.199865 | -1.031878 | 19 | 1 | 0 | 5.770838 | 0.207152  | 0.820171  |
| 72                                                          | 6      | 0      | -4.328815               | -1.761189 | 0.061761  | 20 | 6 | 0 | 3.922048 | 0.770678  | 1.799951  |
| 73                                                          | 6      | 0      | -6.429169               | -1.779594 | -3.111603 | 21 | 1 | 0 | 3.535021 | 0.801549  | 2.827864  |
| 74                                                          | 1      | 0      | -4.51734                | 1.599016  | -0.490242 | 22 | 1 | 0 | 3.99815  | 1.8147    | 1.477355  |
| 75                                                          | 1      | 0      | -5.819376               | 0.791293  | -2.44611  | 23 | 1 | 0 | 2.958342 | -3.34799  | -1.298234 |
| 76                                                          | 1      | 0      | -5.224696               | -3.264217 | -1.176746 | 24 | 1 | 0 | 0.468075 | -2.016956 | -2.214394 |
| 77                                                          | 1      | 0      | -3.913599               | -2.463629 | 0.77751   | 25 | 6 | 0 | 0.827258 | -3.747369 | -0.959462 |
| 78                                                          | 1      | 0      | -6.054071               | -2.735244 | -3.484082 | 26 | 1 | 0 | 0.28503  | -4.287416 | -0.177216 |
| 79                                                          | 1      | 0      | -6.422627               | -1.057774 | -3.930547 | 27 | 1 | 0 | 0.866769 | -4.386763 | -1.842341 |
| 80                                                          | 1      | 0      | -7.469887               | -1.929316 | -2.807096 | 28 | 6 | 0 | 3.328826 | 0.755986  | -1.076344 |
| -----                                                       |        |        |                         |           |           | 29 | 1 | 0 | 4.393916 | 0.579426  | -0.958063 |
| -----                                                       |        |        |                         |           |           | 30 | 6 | 0 | 2.694437 | -0.026457 | -2.042245 |
| <b>TS-H</b>                                                 |        |        |                         |           |           | 31 | 1 | 0 | 1.74041  | 0.195086  | -2.498418 |
| M062X/6-31G*                                                |        |        |                         |           |           | 32 | 7 | 0 | 3.25962  | -1.208823 | -2.454894 |
| E(RM062X) = -2292.661126 Hartree                            |        |        |                         |           |           | 33 | 8 | 0 | 4.35462  | -1.575022 | -1.975102 |
| EE+Thermal Free Energy of Correction = -2292.069641 Hartree |        |        |                         |           |           | 34 | 8 | 0 | 2.667216 | -1.910136 | -3.303547 |
| -----                                                       |        |        |                         |           |           | 35 | 6 | 0 | 2.890914 | 2.161788  | -0.902094 |
| Center                                                      | Atomic | Atomic | Coordinates (Angstroms) |           |           | 36 | 6 | 0 | 2.132826 | 4.849125  | -0.640364 |
| Number                                                      | Number | Type   | X                       | Y         | Z         | 37 | 6 | 0 | 3.853925 | 3.161485  | -0.724382 |
| -----                                                       |        |        |                         |           |           | 38 | 6 | 0 | 1.537986 | 2.525863  | -0.931697 |
| 1                                                           | 6      | 0      | 2.232289                | -3.376125 | -0.47531  | 39 | 6 | 0 | 1.164255 | 3.858796  | -0.807099 |
| 2                                                           | 1      | 0      | 2.601433                | -4.06024  | 0.291732  | 40 | 6 | 0 | 3.478673 | 4.496732  | -0.596288 |
| 3                                                           | 6      | 0      | 0.158551                | -2.397163 | -1.237178 | 41 | 1 | 0 | 4.9051   | 2.886956  | -0.696765 |
| 4                                                           | 1      | 0      | -0.93185                | -2.434773 | -1.192353 | 42 | 1 | 0 | 0.772382 | 1.761021  | -1.051358 |
| 5                                                           | 6      | 0      | 0.719793                | -1.494607 | -0.143364 | 43 | 1 | 0 | 0.113586 | 4.127663  | -0.83798  |
| 6                                                           | 1      | 0      | 0.74347                 | -0.452071 | -0.45891  | 44 | 1 | 0 | 4.238933 | 5.259477  | -0.463842 |

|    |    |   |           |           |           |       |   |   |           |           |           |
|----|----|---|-----------|-----------|-----------|-------|---|---|-----------|-----------|-----------|
| 45 | 1  | 0 | 1.836858  | 5.888248  | -0.541873 | 69    | 6 | 0 | -5.625768 | 0.704068  | 0.036499  |
| 46 | 6  | 0 | -0.060696 | -1.600045 | 1.171274  | 70    | 6 | 0 | -5.769191 | 0.272522  | -1.28551  |
| 47 | 1  | 0 | 0.523453  | -1.181086 | 1.9979    | 71    | 6 | 0 | -4.993214 | -0.802642 | -1.736346 |
| 48 | 1  | 0 | -0.268456 | -2.647184 | 1.399614  | 72    | 6 | 0 | -4.074839 | -1.421072 | -0.89928  |
| 49 | 7  | 0 | -1.333239 | -0.875679 | 1.025871  | 73    | 6 | 0 | -6.713025 | 0.97506   | -2.222562 |
| 50 | 6  | 0 | -1.326859 | 0.526854  | 1.336338  | 74    | 1 | 0 | -4.59546  | 0.430104  | 1.91823   |
| 51 | 6  | 0 | -0.97827  | 0.941413  | 2.623284  | 75    | 1 | 0 | -6.231662 | 1.528941  | 0.398602  |
| 52 | 6  | 0 | -1.015904 | 2.287854  | 2.969784  | 76    | 1 | 0 | -5.110884 | -1.155586 | -2.756435 |
| 53 | 6  | 0 | -1.446415 | 3.232495  | 2.04123   | 77    | 1 | 0 | -3.474143 | -2.256788 | -1.243283 |
| 54 | 6  | 0 | -1.819353 | 2.824422  | 0.766689  | 78    | 1 | 0 | -6.17763  | 1.760583  | -2.766049 |
| 55 | 6  | 0 | -1.734813 | 1.481314  | 0.390489  | 79    | 1 | 0 | -7.535096 | 1.445838  | -1.680065 |
| 56 | 1  | 0 | -0.700704 | 0.191745  | 3.357477  | 80    | 1 | 0 | -7.127235 | 0.284692  | -2.960226 |
| 57 | 1  | 0 | -0.733593 | 2.593476  | 3.971281  | ----- |   |   |           |           |           |
| 58 | 1  | 0 | -1.497879 | 4.281628  | 2.310381  |       |   |   |           |           |           |
| 59 | 1  | 0 | -2.175869 | 3.541717  | 0.035036  |       |   |   |           |           |           |
| 60 | 6  | 0 | -2.113414 | 1.183834  | -1.027384 |       |   |   |           |           |           |
| 61 | 16 | 0 | -2.732762 | -1.7014   | 1.457407  |       |   |   |           |           |           |
| 62 | 8  | 0 | -3.099622 | -1.425347 | 2.84471   |       |   |   |           |           |           |
| 63 | 8  | 0 | -2.514786 | -3.085253 | 1.045065  |       |   |   |           |           |           |
| 64 | 6  | 0 | -3.94257  | -0.955038 | 0.407444  |       |   |   |           |           |           |
| 65 | 8  | 0 | -2.946336 | 1.815653  | -1.634894 |       |   |   |           |           |           |
| 66 | 8  | 0 | -1.386582 | 0.210441  | -1.592104 |       |   |   |           |           |           |
| 67 | 1  | 0 | -1.695891 | 0.10888   | -2.507831 |       |   |   |           |           |           |
| 68 | 6  | 0 | -4.713825 | 0.097422  | 0.892159  |       |   |   |           |           |           |

### < Transition State model of Enantioselective Michael Reaction of $\beta$ -Nitrostyrene with Propionaldehyde using Catalyst **1o** >

To identify the promising TS model for the enantioselective Michael reaction of  $\beta$ -nitrostyrene with propionaldehyde using catalyst **1o**, various TS models consisting of **1o**-enamine generated from catalyst **1o** and propionaldehyde, and  $\beta$ -nitrostyrene were explored based on previous studies and the results in Scheme 5. The energetically favored TS models consisting by hydrogen bonding interaction between **1o**-enamine and  $\beta$ -nitrostyrene (**TS-I** and **TS-J**) were identified at the B3LYP/6-311G\*\* level according to the SCRF method based on PCM (*i*-PrOH). The TS models (**TS-I** and **TS-J**) were further optimized at the M06-02X/6-31G\* level according to the SCRF method based on PCM (*i*-PrOH) to find the most energetically favored TS model (**TS-I**).



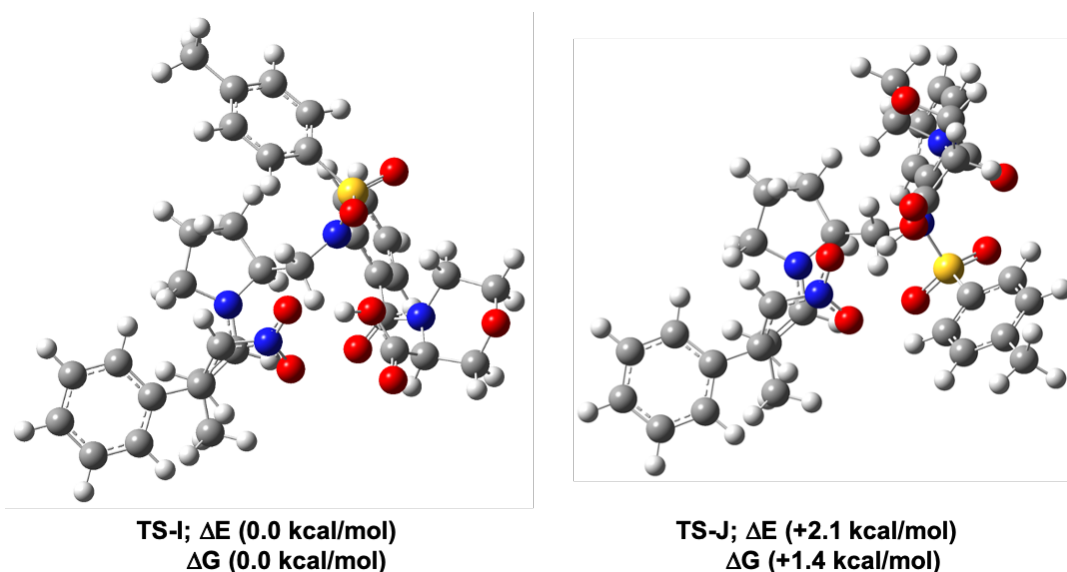

**Figure S3.** Optimized geometries for the transition states of Michael reaction of  $\beta$ -nitrostyrene with propionaldehyde using catalyst **1o**.

|                                                             |        |        |                         |          |           |    |   |   |           |           |           |
|-------------------------------------------------------------|--------|--------|-------------------------|----------|-----------|----|---|---|-----------|-----------|-----------|
| TS-I                                                        |        |        |                         |          |           | 14 | 1 | 0 | -0.003602 | 0.817878  | -0.740921 |
| M062X/6-31G*                                                |        |        |                         |          |           | 15 | 1 | 0 | -0.140768 | -0.731875 | 0.067586  |
| E(RM062X) = -2575.777237 Hartree                            |        |        |                         |          |           | 16 | 6 | 0 | 2.235799  | -0.568531 | 1.689106  |
| EE+Thermal Free Energy of Correction = -2575.132327 Hartree |        |        |                         |          |           | 17 | 6 | 0 | 3.594062  | -0.81199  | 1.806633  |
| -----                                                       |        |        |                         |          |           |    |   |   |           |           |           |
| Center                                                      | Atomic | Atomic | Coordinates (Angstroms) |          |           |    |   |   |           |           |           |
| Number                                                      | Number | Type   | X                       | Y        | Z         |    |   |   |           |           |           |
| -----                                                       |        |        |                         |          |           |    |   |   |           |           |           |
| 1                                                           | 7      | 0      | 1.722545                | 0.612317 | 1.338128  | 22 | 1 | 0 | 3.398996  | -2.937149 | 2.065096  |
| 2                                                           | 6      | 0      | 2.521499                | 1.840668 | 1.258743  | 23 | 1 | 0 | 1.50681   | -1.370418 | 1.807012  |
| 3                                                           | 6      | 0      | 1.506738                | 2.882413 | 0.800786  | 24 | 7 | 0 | -1.854691 | 0.497943  | 0.186058  |
| 4                                                           | 6      | 0      | 0.223308                | 2.431054 | 1.50719   | 25 | 6 | 0 | -2.579035 | 0.255682  | 1.396421  |
| 5                                                           | 6      | 0      | 0.274544                | 0.901638 | 1.404426  | 26 | 6 | 0 | -2.634884 | -1.044367 | 1.90926   |
| 6                                                           | 6      | 0      | -0.392274               | 0.327231 | 0.156516  | 27 | 6 | 0 | -3.28535  | -1.283277 | 3.120211  |
| 7                                                           | 1      | 0      | 3.356423                | 1.703774 | 0.571005  | 28 | 6 | 0 | -3.909944 | -0.243715 | 3.801536  |
| 8                                                           | 1      | 0      | 2.92609                 | 2.077371 | 2.252549  | 29 | 6 | 0 | -3.856399 | 1.050059  | 3.287957  |
| 9                                                           | 1      | 0      | 1.387101                | 2.829517 | -0.286245 | 30 | 6 | 0 | -3.177309 | 1.301026  | 2.100716  |
| 10                                                          | 1      | 0      | 1.804816                | 3.898484 | 1.062123  | 31 | 6 | 0 | -1.903026 | -2.187564 | 1.251983  |
| 11                                                          | 1      | 0      | -0.682745               | 2.843796 | 1.055948  | 32 | 1 | 0 | -3.307283 | -2.292829 | 3.518721  |
| 12                                                          | 1      | 0      | 0.248225                | 2.73241  | 2.558313  | 33 | 1 | 0 | -4.427181 | -0.441153 | 4.734     |
| 13                                                          | 1      | 0      | -0.144101               | 0.415684 | 2.291764  | 34 | 1 | 0 | -4.327244 | 1.86959   | 3.819795  |

|    |    |   |           |           |           |                                                               |   |   |           |           |           |
|----|----|---|-----------|-----------|-----------|---------------------------------------------------------------|---|---|-----------|-----------|-----------|
| 35 | 1  | 0 | -3.100643 | 2.312445  | 1.716218  | 73                                                            | 7 | 0 | 2.059377  | -1.084942 | -1.386478 |
| 36 | 16 | 0 | -2.613124 | 1.165524  | -1.134901 | 74                                                            | 8 | 0 | 1.264848  | -0.683102 | -2.284236 |
| 37 | 8  | 0 | -4.044239 | 1.02303   | -0.899523 | 75                                                            | 8 | 0 | 1.783768  | -2.066819 | -0.676614 |
| 38 | 8  | 0 | -1.990382 | 0.600324  | -2.32357  | 76                                                            | 1 | 0 | 4.052681  | -2.055152 | -0.161499 |
| 39 | 6  | 0 | -2.213446 | 2.896013  | -1.135448 | 77                                                            | 1 | 0 | 3.361701  | 0.482049  | -1.77876  |
| 40 | 6  | 0 | -3.053967 | 3.797776  | -0.486336 | 78                                                            | 6 | 0 | 5.560811  | -0.481865 | -0.27258  |
| 41 | 6  | 0 | -2.677344 | 5.133584  | -0.411324 | 79                                                            | 6 | 0 | 6.603099  | -1.380776 | -0.011236 |
| 42 | 6  | 0 | -1.477541 | 5.578748  | -0.978417 | 80                                                            | 6 | 0 | 7.922871  | -0.941724 | 0.049451  |
| 43 | 6  | 0 | -0.666548 | 4.65533   | -1.646401 | 81                                                            | 6 | 0 | 8.220018  | 0.403452  | -0.150118 |
| 44 | 6  | 0 | -1.028251 | 3.315508  | -1.736454 | 82                                                            | 6 | 0 | 7.191202  | 1.306961  | -0.419041 |
| 45 | 6  | 0 | -1.088913 | 7.031228  | -0.908373 | 83                                                            | 6 | 0 | 5.874211  | 0.86929   | -0.479685 |
| 46 | 1  | 0 | -3.991832 | 3.456375  | -0.060153 | 84                                                            | 1 | 0 | 6.377215  | -2.434753 | 0.121769  |
| 47 | 1  | 0 | -3.326188 | 5.843953  | 0.092117  | 85                                                            | 1 | 0 | 8.717741  | -1.652803 | 0.248106  |
| 48 | 1  | 0 | 0.259333  | 4.989738  | -2.10519  | 86                                                            | 1 | 0 | 9.247448  | 0.748295  | -0.100798 |
| 49 | 1  | 0 | -0.408356 | 2.605486  | -2.275258 | 87                                                            | 1 | 0 | 7.416859  | 2.355695  | -0.580943 |
| 50 | 1  | 0 | -1.494494 | 7.505052  | -0.012296 | 88                                                            | 1 | 0 | 5.086377  | 1.585474  | -0.693717 |
| 51 | 1  | 0 | -1.480354 | 7.571493  | -1.776167 | -----                                                         |   |   |           |           |           |
| 52 | 1  | 0 | -0.003418 | 7.149189  | -0.906803 |                                                               |   |   |           |           |           |
| 53 | 8  | 0 | -0.801103 | -2.525508 | 1.679806  | <b>TS-J</b>                                                   |   |   |           |           |           |
| 54 | 7  | 0 | -2.534966 | -2.843804 | 0.245671  | M062X/6-31G*                                                  |   |   |           |           |           |
| 55 | 6  | 0 | -1.790573 | -3.888233 | -0.442863 | E(RM062X) = -2575.773918 Hartree                              |   |   |           |           |           |
| 56 | 6  | 0 | -2.749045 | -4.930098 | -1.015121 | EE+Thermal Free Energy of Correction = -2575.130046 Hartree   |   |   |           |           |           |
| 57 | 8  | 0 | -3.748808 | -4.32057  | -1.805418 | -----                                                         |   |   |           |           |           |
| 58 | 6  | 0 | -4.530852 | -3.439555 | -1.016257 | Center    Atomic    Atomic            Coordinates (Angstroms) |   |   |           |           |           |
| 59 | 6  | 0 | -3.67928  | -2.296215 | -0.487055 | Number    Number    Type    X            Y            Z       |   |   |           |           |           |
| 60 | 1  | 0 | -1.13047  | -4.368468 | 0.283637  | -----                                                         |   |   |           |           |           |
| 61 | 1  | 0 | -2.190782 | -5.614308 | -1.655953 | 1                                                             | 7 | 0 | 1.945928  | -1.586286 | -0.88814  |
| 62 | 1  | 0 | -3.207883 | -5.492143 | -0.189488 | 2                                                             | 6 | 0 | 2.5566    | -2.72292  | -0.191939 |
| 63 | 1  | 0 | -5.322462 | -3.048755 | -1.657905 | 3                                                             | 6 | 0 | 1.352013  | -3.370913 | 0.478558  |
| 64 | 1  | 0 | -4.984962 | -3.991848 | -0.180187 | 4                                                             | 6 | 0 | 0.273352  | -3.24074  | -0.602578 |
| 65 | 1  | 0 | -3.309756 | -1.692198 | -1.324301 | 5                                                             | 6 | 0 | 0.519754  | -1.84456  | -1.203852 |
| 66 | 1  | 0 | -4.266316 | -1.657311 | 0.174177  | 6                                                             | 6 | 0 | -0.382755 | -0.747459 | -0.61979  |
| 67 | 6  | 0 | -0.867194 | -3.335563 | -1.533941 | 7                                                             | 1 | 0 | 3.319782  | -2.378878 | 0.505634  |
| 68 | 8  | 0 | -0.161936 | -4.067087 | -2.193812 | 8                                                             | 1 | 0 | 3.025934  | -3.398469 | -0.921276 |
| 69 | 8  | 0 | -0.936633 | -2.024547 | -1.647651 | 9                                                             | 1 | 0 | 1.078185  | -2.790598 | 1.36688   |
| 70 | 1  | 0 | -0.138305 | -1.639731 | -2.102761 | 10                                                            | 1 | 0 | 1.540042  | -4.402574 | 0.777125  |
| 71 | 6  | 0 | 4.176928  | -0.991534 | -0.339599 | 11                                                            | 1 | 0 | -0.742302 | -3.340223 | -0.212663 |
| 72 | 6  | 0 | 3.244781  | -0.419538 | -1.197114 | 12                                                            | 1 | 0 | 0.416955  | -4.008979 | -1.368083 |

|    |    |   |           |           |           |    |   |   |           |           |           |
|----|----|---|-----------|-----------|-----------|----|---|---|-----------|-----------|-----------|
| 13 | 1  | 0 | 0.402643  | -1.84196  | -2.291611 | 51 | 1 | 0 | -0.414762 | 6.237697  | 0.419213  |
| 14 | 1  | 0 | -0.680786 | -0.989699 | 0.403862  | 52 | 1 | 0 | -2.054252 | 5.914984  | 1.011277  |
| 15 | 1  | 0 | 0.156926  | 0.203118  | -0.562475 | 53 | 8 | 0 | -4.264898 | 0.697282  | -0.081896 |
| 16 | 6  | 0 | 2.644716  | -0.667695 | -1.564226 | 54 | 7 | 0 | -3.452606 | -0.514865 | 1.65683   |
| 17 | 6  | 0 | 4.020508  | -0.539537 | -1.52865  | 55 | 6 | 0 | -3.431578 | 0.646205  | 2.536745  |
| 18 | 6  | 0 | 4.706793  | 0.40988   | -2.471772 | 56 | 6 | 0 | -3.992068 | 0.262373  | 3.902123  |
| 19 | 1  | 0 | 4.594848  | -1.393387 | -1.179214 | 57 | 8 | 0 | -3.301625 | -0.85349  | 4.433121  |
| 20 | 1  | 0 | 4.969248  | -0.08229  | -3.413762 | 58 | 6 | 0 | -3.420176 | -1.981704 | 3.586039  |
| 21 | 1  | 0 | 5.637034  | 0.793166  | -2.041666 | 59 | 6 | 0 | -2.804394 | -1.694219 | 2.222604  |
| 22 | 1  | 0 | 4.061175  | 1.262067  | -2.704554 | 60 | 1 | 0 | -4.042475 | 1.426493  | 2.074223  |
| 23 | 1  | 0 | 2.035798  | 0.035528  | -2.133166 | 61 | 1 | 0 | -3.854903 | 1.086458  | 4.602232  |
| 24 | 7  | 0 | -1.602645 | -0.518786 | -1.403496 | 62 | 1 | 0 | -5.062415 | 0.035916  | 3.799625  |
| 25 | 6  | 0 | -2.597948 | -1.547395 | -1.486292 | 63 | 1 | 0 | -2.894423 | -2.804788 | 4.073448  |
| 26 | 6  | 0 | -3.646971 | -1.537218 | -0.562254 | 64 | 1 | 0 | -4.479131 | -2.252988 | 3.460119  |
| 27 | 6  | 0 | -4.589283 | -2.566017 | -0.572641 | 65 | 1 | 0 | -1.728312 | -1.499616 | 2.344367  |
| 28 | 6  | 0 | -4.495842 | -3.589459 | -1.511516 | 66 | 1 | 0 | -2.932434 | -2.547722 | 1.556839  |
| 29 | 6  | 0 | -3.461762 | -3.587407 | -2.445766 | 67 | 6 | 0 | -1.997209 | 1.18003   | 2.673084  |
| 30 | 6  | 0 | -2.512113 | -2.570947 | -2.430703 | 68 | 8 | 0 | -1.570917 | 1.679519  | 3.690206  |
| 31 | 6  | 0 | -3.803683 | -0.350819 | 0.353321  | 69 | 8 | 0 | -1.306688 | 1.028439  | 1.555556  |
| 32 | 1  | 0 | -5.399568 | -2.55646  | 0.150487  | 70 | 1 | 0 | -0.325191 | 1.092914  | 1.726632  |
| 33 | 1  | 0 | -5.233706 | -4.384333 | -1.517867 | 71 | 6 | 0 | 4.301182  | 0.489609  | 0.446046  |
| 34 | 1  | 0 | -3.390999 | -4.379369 | -3.183246 | 72 | 6 | 0 | 3.302323  | 0.133155  | 1.339387  |
| 35 | 1  | 0 | -1.699512 | -2.563806 | -3.151327 | 73 | 7 | 0 | 2.060114  | 0.695078  | 1.197705  |
| 36 | 16 | 0 | -1.460376 | 0.567744  | -2.662113 | 74 | 8 | 0 | 1.173443  | 0.416778  | 2.050754  |
| 37 | 8  | 0 | -2.671053 | 0.438496  | -3.462801 | 75 | 8 | 0 | 1.823338  | 1.4675    | 0.252198  |
| 38 | 8  | 0 | -0.152166 | 0.383608  | -3.297904 | 76 | 1 | 0 | 4.143739  | 1.414339  | -0.100669 |
| 39 | 6  | 0 | -1.439546 | 2.15287   | -1.87639  | 77 | 1 | 0 | 3.394098  | -0.556358 | 2.164588  |
| 40 | 6  | 0 | -2.653423 | 2.755636  | -1.547108 | 78 | 6 | 0 | 5.703183  | 0.104955  | 0.696202  |
| 41 | 6  | 0 | -2.630646 | 3.982455  | -0.900877 | 79 | 6 | 0 | 6.726142  | 0.994042  | 0.344149  |
| 42 | 6  | 0 | -1.418892 | 4.609442  | -0.577767 | 80 | 6 | 0 | 8.059019  | 0.674312  | 0.589846  |
| 43 | 6  | 0 | -0.22177  | 3.980472  | -0.924084 | 81 | 6 | 0 | 8.385519  | -0.541113 | 1.184299  |
| 44 | 6  | 0 | -0.221477 | 2.75302   | -1.580619 | 82 | 6 | 0 | 7.37377   | -1.436134 | 1.535934  |
| 45 | 6  | 0 | -1.422219 | 5.943847  | 0.119709  | 83 | 6 | 0 | 6.044104  | -1.116899 | 1.293819  |
| 46 | 1  | 0 | -3.587118 | 2.256233  | -1.775146 | 84 | 1 | 0 | 6.470728  | 1.948384  | -0.107484 |
| 47 | 1  | 0 | -3.567177 | 4.465758  | -0.637614 | 85 | 1 | 0 | 8.839892  | 1.376222  | 0.317183  |
| 48 | 1  | 0 | 0.724545  | 4.4517    | -0.67687  | 86 | 1 | 0 | 9.423581  | -0.793747 | 1.37286   |
| 49 | 1  | 0 | 0.709888  | 2.266809  | -1.848636 | 87 | 1 | 0 | 7.623959  | -2.386015 | 1.996338  |
| 50 | 1  | 0 | -1.822575 | 6.720936  | -0.538436 | 88 | 1 | 0 | 5.266743  | -1.826277 | 1.56423   |

**< Distortion/Interaction Analysis of TS-Cat 1o and TS-Cat 1e >**

To support the origin of the enantioselectivity differences between Cat **1o** and Cat **1e** for Michael reaction of  $\beta$ -nitrostyrene with proionaldehyde, a flexibility of TS models was considered by distortion/interaction analysis at the M06-02X/6-31G\* level according to the SCRF method based on PCM (i-PrOH).

< Michael Reaction of  $\beta$ -Nitrostyrene (**2a**) with Propionaldehyde (**5a**) using Catalyst **1o** and **1e** >

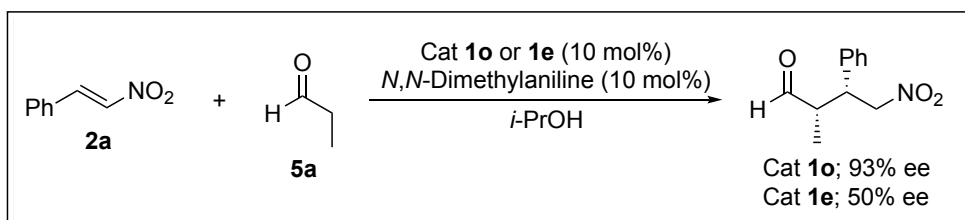

**< Distortion/Interaction Analysis of TS-Cat 1o >**

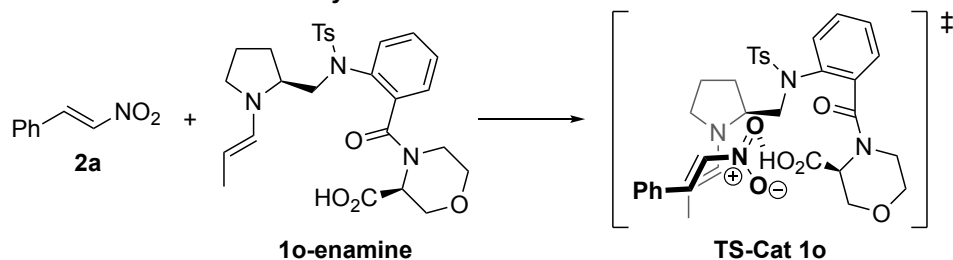

**< Distortion/Interaction Analysis of TS-Cat 1e >**

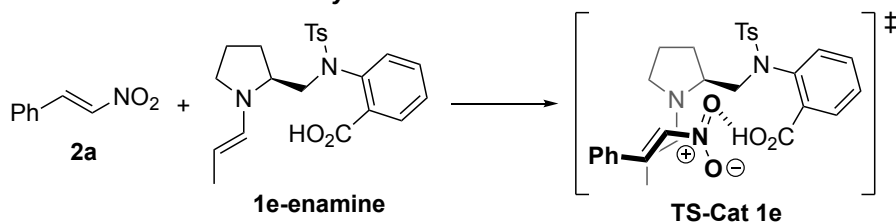

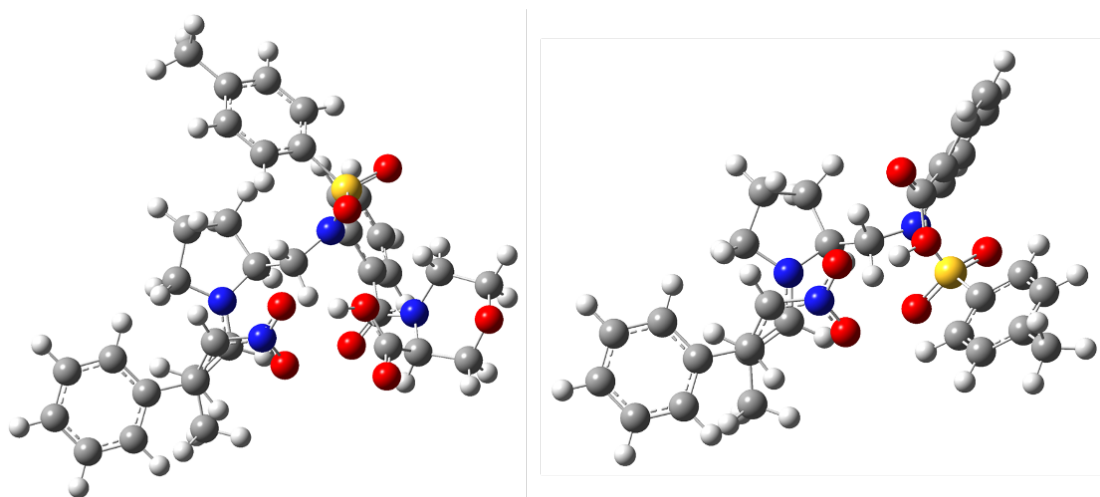

**TS-Cat 1o**  
 $E_{\text{dist(enamine)}} = 10.0 \text{ kcal/mol}$   
 $E_{\text{dist(nitrostyrene)}} = 11.3 \text{ kcal/mol}$   
 $E_{\text{int}} = 29.3 \text{ kcal/mol}$   
 $\Delta E_{\ddagger} = -8.0 \text{ kcal/mol}$

**TS-Cat 1e**  
 $E_{\text{dist(enamine)}} = 11.2 \text{ kcal/mol}$   
 $E_{\text{dist(nitrostyrene)}} = 10.6 \text{ kcal/mol}$   
 $E_{\text{int}} = 27.9 \text{ kcal/mol}$   
 $\Delta E_{\ddagger} = -6.1 \text{ kcal/mol}$

$$E_{\text{int-TS-Cat 1o}} - E_{\text{int-TS-Cat 1e}} = +1.4 \text{ kcal/mol}$$

**Figure S4.** Distortion/interaction analysis of the transition states of Michael reaction of  $\beta$ -nitrostyrene with propionaldehyde between catalyst **1o** and catalyst **1e**.

| $\beta$ -Nitrostyrene (2a)                                 |        |        |                         |           |           | 11                                                          | 8      | 0      | -2.996238               | 2.534391  | -0.06511  |
|------------------------------------------------------------|--------|--------|-------------------------|-----------|-----------|-------------------------------------------------------------|--------|--------|-------------------------|-----------|-----------|
| M062X/6-31G*                                               |        |        |                         |           |           | 12                                                          | 1      | 0      | -2.127164               | 0.306383  | -0.07963  |
| E(RM062X) = -513.945300 Hartree                            |        |        |                         |           |           | 13                                                          | 1      | 0      | 0.662029                | 1.624501  | 0.067358  |
| EE+Thermal Free Energy of Correction = -513.842351 Hartree |        |        |                         |           |           | 14                                                          | 1      | 0      | 2.599434                | 0.295896  | 0.117628  |
| -----                                                      |        |        |                         |           |           | 15                                                          | 1      | 0      | 3.757635                | -1.892325 | 0.115728  |
| Center                                                     | Atomic | Atomic | Coordinates (Angstroms) |           |           | 16                                                          | 1      | 0      | 2.436127                | -3.990848 | 0.012404  |
| Number                                                     | Number | Type   | X                       | Y         | Z         | 17                                                          | 1      | 0      | -0.040369               | -3.891261 | -0.088673 |
| -----                                                      |        |        |                         |           |           | 18                                                          | 1      | 0      | -1.196789               | -1.721047 | -0.087128 |
| 1                                                          | 7      | 0      | -1.783817               | 2.381159  | -0.017585 | -----                                                       |        |        |                         |           |           |
| 2                                                          | 6      | 0      | -1.311713               | 1.012524  | -0.029229 | <b>1o-enamine</b>                                           |        |        |                         |           |           |
| 3                                                          | 6      | 0      | -0.000706               | 0.76384   | 0.019879  | M062X/6-31G*                                                |        |        |                         |           |           |
| 4                                                          | 6      | 0      | 0.625782                | -0.55689  | 0.015675  | E(RM062X) = -2061.819190 Hartree                            |        |        |                         |           |           |
| 5                                                          | 6      | 0      | 2.024227                | -0.624202 | 0.072495  | EE+Thermal Free Energy of Correction = -2061.307672 Hartree |        |        |                         |           |           |
| 6                                                          | 6      | 0      | 2.674655                | -1.853546 | 0.071417  | -----                                                       |        |        |                         |           |           |
| 7                                                          | 6      | 0      | 1.932202                | -3.030029 | 0.013421  | Center                                                      | Atomic | Atomic | Coordinates (Angstroms) |           |           |
| 8                                                          | 6      | 0      | 0.537871                | -2.974717 | -0.043504 | Number                                                      | Number | Type   | X                       | Y         | Z         |
| 9                                                          | 6      | 0      | -0.112891               | -1.749352 | -0.042537 | -----                                                       |        |        |                         |           |           |
| 10                                                         | 8      | 0      | -0.980764               | 3.300478  | 0.037393  |                                                             |        |        |                         |           |           |

|    |    |   |           |           |           |                                                                    |   |   |           |           |           |
|----|----|---|-----------|-----------|-----------|--------------------------------------------------------------------|---|---|-----------|-----------|-----------|
| 1  | 7  | 0 | 4.015601  | -1.97028  | 0.355154  | 39                                                                 | 6 | 0 | 0.93531   | 2.309907  | -0.767505 |
| 2  | 6  | 0 | 4.371581  | -3.03473  | 1.280511  | 40                                                                 | 6 | 0 | -0.002824 | 3.156999  | -0.176153 |
| 3  | 6  | 0 | 3.080326  | -3.255032 | 2.067781  | 41                                                                 | 6 | 0 | 0.377493  | 4.452363  | 0.148559  |
| 4  | 6  | 0 | 1.998969  | -3.013046 | 1.008007  | 42                                                                 | 6 | 0 | 1.675586  | 4.910604  | -0.108837 |
| 5  | 6  | 0 | 2.56682   | -1.856262 | 0.174884  | 43                                                                 | 6 | 0 | 2.592909  | 4.039356  | -0.703915 |
| 6  | 6  | 0 | 2.109944  | -0.484482 | 0.682924  | 44                                                                 | 6 | 0 | 2.233418  | 2.737511  | -1.036577 |
| 7  | 1  | 0 | 5.216583  | -2.736787 | 1.911268  | 45                                                                 | 6 | 0 | 2.061903  | 6.327223  | 0.22251   |
| 8  | 1  | 0 | 4.670306  | -3.944309 | 0.732795  | 46                                                                 | 1 | 0 | -1.011761 | 2.805655  | 0.015397  |
| 9  | 1  | 0 | 3.005803  | -2.517244 | 2.873617  | 47                                                                 | 1 | 0 | -0.343696 | 5.122013  | 0.607482  |
| 10 | 1  | 0 | 3.02724   | -4.249076 | 2.515107  | 48                                                                 | 1 | 0 | 3.600716  | 4.38493   | -0.912796 |
| 11 | 1  | 0 | 1.009067  | -2.778927 | 1.405935  | 49                                                                 | 1 | 0 | 2.939203  | 2.065605  | -1.513886 |
| 12 | 1  | 0 | 1.898384  | -3.900281 | 0.374921  | 50                                                                 | 1 | 0 | 1.742254  | 7.004837  | -0.575486 |
| 13 | 1  | 0 | 2.288854  | -1.940259 | -0.880846 | 51                                                                 | 1 | 0 | 3.143306  | 6.427016  | 0.332133  |
| 14 | 1  | 0 | 2.190041  | -0.45373  | 1.772753  | 52                                                                 | 1 | 0 | 1.583614  | 6.658796  | 1.146749  |
| 15 | 1  | 0 | 2.771047  | 0.297336  | 0.289598  | 53                                                                 | 8 | 0 | -1.196761 | -2.631068 | 0.335655  |
| 16 | 6  | 0 | 4.875508  | -1.598247 | -0.659541 | 54                                                                 | 7 | 0 | -3.009778 | -1.444726 | -0.338665 |
| 17 | 6  | 0 | 6.158797  | -1.965355 | -0.796361 | 55                                                                 | 6 | 0 | -3.728776 | -0.195089 | -0.495469 |
| 18 | 6  | 0 | 7.031214  | -1.475929 | -1.91601  | 56                                                                 | 6 | 0 | -3.973965 | 0.080225  | -1.987739 |
| 19 | 1  | 0 | 6.607375  | -2.636742 | -0.067804 | 57                                                                 | 8 | 0 | -4.624225 | -1.015088 | -2.597259 |
| 20 | 1  | 0 | 7.428438  | -2.303768 | -2.514258 | 58                                                                 | 6 | 0 | -3.794769 | -2.166078 | -2.541241 |
| 21 | 1  | 0 | 7.895774  | -0.912978 | -1.545449 | 59                                                                 | 6 | 0 | -3.552116 | -2.572654 | -1.096777 |
| 22 | 1  | 0 | 6.471642  | -0.819044 | -2.588507 | 60                                                                 | 1 | 0 | -3.132154 | 0.630056  | -0.097036 |
| 23 | 1  | 0 | 4.422855  | -0.923157 | -1.38737  | 61                                                                 | 1 | 0 | -4.617543 | 0.952663  | -2.104665 |
| 24 | 7  | 0 | 0.702129  | -0.213491 | 0.324629  | 62                                                                 | 1 | 0 | -3.002444 | 0.266957  | -2.459892 |
| 25 | 6  | 0 | -0.237291 | 0.084392  | 1.36693   | 63                                                                 | 1 | 0 | -4.31293  | -2.962685 | -3.078564 |
| 26 | 6  | 0 | -1.503248 | -0.514664 | 1.36207   | 64                                                                 | 1 | 0 | -2.836814 | -1.957386 | -3.039729 |
| 27 | 6  | 0 | -2.408924 | -0.200487 | 2.377945  | 65                                                                 | 1 | 0 | -4.49855  | -2.876454 | -0.635805 |
| 28 | 6  | 0 | -2.064405 | 0.692757  | 3.388244  | 66                                                                 | 1 | 0 | -2.839651 | -3.393692 | -1.033488 |
| 29 | 6  | 0 | -0.808644 | 1.293438  | 3.382948  | 67                                                                 | 6 | 0 | -5.047043 | -0.238205 | 0.275023  |
| 30 | 6  | 0 | 0.096194  | 0.998893  | 2.368067  | 68                                                                 | 8 | 0 | -5.393065 | -1.126875 | 1.015984  |
| 31 | 6  | 0 | -1.865254 | -1.605913 | 0.3853    | 69                                                                 | 8 | 0 | -5.780179 | 0.854928  | 0.044002  |
| 32 | 1  | 0 | -3.383343 | -0.680788 | 2.379041  | 70                                                                 | 1 | 0 | -6.597518 | 0.785226  | 0.563798  |
| 33 | 1  | 0 | -2.774414 | 0.916242  | 4.176936  | -----                                                              |   |   |           |           |           |
| 34 | 1  | 0 | -0.534462 | 1.998987  | 4.159612  |                                                                    |   |   |           |           |           |
| 35 | 1  | 0 | 1.068197  | 1.483038  | 2.342709  | <b>TS-Cat 1<math>\alpha</math>-<math>\beta</math>-Nitrostyrene</b> |   |   |           |           |           |
| 36 | 16 | 0 | 0.486746  | 0.629862  | -1.10246  | M062X/6-31G*                                                       |   |   |           |           |           |
| 37 | 8  | 0 | -0.942983 | 0.594396  | -1.390988 | E(RM062X) = -513.927272 Hartree                                    |   |   |           |           |           |
| 38 | 8  | 0 | 1.448301  | 0.081793  | -2.05067  | EE+Thermal Free Energy of Correction = -513.823928 Hartree         |   |   |           |           |           |

| -----                                                       |        |        |                         |           |           | 7                                                                                | 1  | 0 | -2.167366 | 4.337567  | -1.068989 |
|-------------------------------------------------------------|--------|--------|-------------------------|-----------|-----------|----------------------------------------------------------------------------------|----|---|-----------|-----------|-----------|
| Center                                                      | Atomic | Atomic | Coordinates (Angstroms) |           |           | 8                                                                                | 1  | 0 | -2.472424 | 4.43137   | 0.677576  |
| Number                                                      | Number | Type   | X                       | Y         | Z         | 9                                                                                | 1  | 0 | -3.025983 | 2.073306  | -1.196669 |
| -----                                                       |        |        |                         |           |           | 10                                                                               | 1  | 0 | -4.134391 | 2.768678  | -0.003705 |
| 1                                                           | 6      | 0      | -0.637453               | 0.476443  | -0.346895 | 11                                                                               | 1  | 0 | -2.759002 | 0.563893  | 0.736294  |
| 2                                                           | 6      | 0      | -1.590604               | -0.469023 | 0.01228   | 12                                                                               | 1  | 0 | -2.764866 | 1.936926  | 1.854757  |
| 3                                                           | 7      | 0      | -2.901806               | -0.066367 | 0.061473  | 13                                                                               | 1  | 0 | -0.417884 | 1.769974  | 1.618134  |
| 4                                                           | 8      | 0      | -3.768195               | -0.849621 | 0.545833  | 14                                                                               | 1  | 0 | -0.849824 | 0.871103  | -1.277404 |
| 5                                                           | 8      | 0      | -3.218421               | 1.055354  | -0.369162 | 15                                                                               | 1  | 0 | 0.708317  | 1.196088  | -0.542004 |
| 6                                                           | 1      | 0      | -0.941415               | 1.511489  | -0.225541 | 16                                                                               | 6  | 0 | 0.23892   | 3.9297    | 0.239732  |
| 7                                                           | 1      | 0      | -1.414607               | -1.49242  | 0.306434  | 17                                                                               | 6  | 0 | 0.300567  | 5.272084  | -0.095181 |
| 8                                                           | 6      | 0      | 0.803908                | 0.202248  | -0.183551 | 18                                                                               | 6  | 0 | 1.541946  | 6.060723  | 0.218337  |
| 9                                                           | 6      | 0      | 1.664944                | 1.261894  | 0.130253  | 19                                                                               | 1  | 0 | -0.636406 | 5.820693  | -0.136792 |
| 10                                                          | 6      | 0      | 3.028945                | 1.043046  | 0.303039  | 20                                                                               | 1  | 0 | 1.523961  | 6.455211  | 1.239406  |
| 11                                                          | 6      | 0      | 3.552413                | -0.23927  | 0.164226  | 21                                                                               | 1  | 0 | 1.642553  | 6.91839   | -0.453445 |
| 12                                                          | 6      | 0      | 2.70356                 | -1.304066 | -0.140352 | 22                                                                               | 1  | 0 | 2.434043  | 5.436219  | 0.110964  |
| 13                                                          | 6      | 0      | 1.34251                 | -1.086133 | -0.312832 | 23                                                                               | 1  | 0 | 1.131005  | 3.383409  | 0.546489  |
| 14                                                          | 1      | 0      | 1.256381                | 2.259505  | 0.262272  | 24                                                                               | 7  | 0 | -0.282623 | -0.525933 | 0.176815  |
| 15                                                          | 1      | 0      | 3.680072                | 1.874712  | 0.550589  | 25                                                                               | 6  | 0 | 0.059457  | -0.783955 | 1.542373  |
| 16                                                          | 1      | 0      | 4.615362                | -0.411764 | 0.295929  | 26                                                                               | 6  | 0 | 1.357886  | -0.509273 | 1.983829  |
| 17                                                          | 1      | 0      | 3.104582                | -2.306725 | -0.244438 | 27                                                                               | 6  | 0 | 1.686845  | -0.698215 | 3.326466  |
| 18                                                          | 1      | 0      | 0.695857                | -1.926917 | -0.54593  | 28                                                                               | 6  | 0 | 0.742657  | -1.192713 | 4.220329  |
| -----                                                       |        |        |                         |           |           | 29                                                                               | 6  | 0 | -0.54925  | -1.469017 | 3.778613  |
| <b>TS-Cat 1o-enamine</b>                                    |        |        |                         |           |           | 30                                                                               | 6  | 0 | -0.893843 | -1.24705  | 2.449825  |
| M062X/6-31G*                                                |        |        |                         |           |           | 31                                                                               | 6  | 0 | 2.390674  | 0.106478  | 1.073485  |
| E(RM062X) = -2061.803207 Hartree                            |        |        |                         |           |           | 32                                                                               | 1  | 0 | 2.692295  | -0.464716 | 3.66267   |
| EE+Thermal Free Energy of Correction = -2061.286851 Hartree |        |        |                         |           |           | 33                                                                               | 1  | 0 | 1.011487  | -1.351882 | 5.25879   |
| -----                                                       |        |        |                         |           |           | 34 <th>1</th> <th>0</th> <th>-1.296478</th> <th>-1.840344</th> <th>4.471393</th> | 1  | 0 | -1.296478 | -1.840344 | 4.471393  |
| Center                                                      | Atomic | Atomic | Coordinates (Angstroms) |           |           | 35                                                                               | 1  | 0 | -1.908339 | -1.424904 | 2.109457  |
| Number                                                      | Number | Type   | X                       | Y         | Z         | 36                                                                               | 16 | 0 | -0.850046 | -1.747413 | -0.798805 |
| -----                                                       |        |        |                         |           |           | 37                                                                               | 8  | 0 | -0.517785 | -2.996146 | -0.124961 |
| 1                                                           | 7      | 0      | -0.865068               | 3.188273  | 0.127863  | 38                                                                               | 8  | 0 | -0.378228 | -1.477557 | -2.149641 |
| 2                                                           | 6      | 0      | -2.188938               | 3.759771  | -0.144594 | 39                                                                               | 6  | 0 | -2.618249 | -1.587247 | -0.845089 |
| 3                                                           | 6      | 0      | -3.089028               | 2.530533  | -0.203836 | 40                                                                               | 6  | 0 | -3.397362 | -2.277636 | 0.080839  |
| 4                                                           | 6      | 0      | -2.467955               | 1.610979  | 0.853808  | 41                                                                               | 6  | 0 | -4.770954 | -2.065718 | 0.094702  |
| 5                                                           | 6      | 0      | -0.959375               | 1.815469  | 0.667607  | 42                                                                               | 6  | 0 | -5.374117 | -1.178791 | -0.804657 |
| 6                                                           | 6      | 0      | -0.30761                | 0.857574  | -0.327133 | 43                                                                               | 6  | 0 | -4.569714 | -0.519521 | -1.740024 |
|                                                             |        |        |                         |           |           | 44                                                                               | 6  | 0 | -3.194196 | -0.721809 | -1.773083 |





|    |   |   |           |           |           |                                                               |   |   |          |           |           |
|----|---|---|-----------|-----------|-----------|---------------------------------------------------------------|---|---|----------|-----------|-----------|
| 41 | 6 | 0 | -2.677344 | 5.133584  | -0.411324 | 79                                                            | 6 | 0 | 6.603099 | -1.380776 | -0.011236 |
| 42 | 6 | 0 | -1.477541 | 5.578748  | -0.978417 | 80                                                            | 6 | 0 | 7.922871 | -0.941724 | 0.049451  |
| 43 | 6 | 0 | -0.666548 | 4.655533  | -1.646401 | 81                                                            | 6 | 0 | 8.220018 | 0.403452  | -0.150118 |
| 44 | 6 | 0 | -1.028251 | 3.315508  | -1.736454 | 82                                                            | 6 | 0 | 7.191202 | 1.306961  | -0.419041 |
| 45 | 6 | 0 | -1.088913 | 7.031228  | -0.908373 | 83                                                            | 6 | 0 | 5.874211 | 0.86929   | -0.479685 |
| 46 | 1 | 0 | -3.991832 | 3.456375  | -0.060153 | 84                                                            | 1 | 0 | 6.377215 | -2.434753 | 0.121769  |
| 47 | 1 | 0 | -3.326188 | 5.843953  | 0.092117  | 85                                                            | 1 | 0 | 8.717741 | -1.652803 | 0.248106  |
| 48 | 1 | 0 | 0.259333  | 4.989738  | -2.10519  | 86                                                            | 1 | 0 | 9.247448 | 0.748295  | -0.100798 |
| 49 | 1 | 0 | -0.408356 | 2.605486  | -2.275258 | 87                                                            | 1 | 0 | 7.416859 | 2.355695  | -0.580943 |
| 50 | 1 | 0 | -1.494494 | 7.505052  | -0.012296 | 88                                                            | 1 | 0 | 5.086377 | 1.585474  | -0.693717 |
| 51 | 1 | 0 | -1.480354 | 7.571493  | -1.776167 | -----                                                         |   |   |          |           |           |
| 52 | 1 | 0 | -0.003418 | 7.149189  | -0.906803 |                                                               |   |   |          |           |           |
| 53 | 8 | 0 | -0.801103 | -2.525508 | 1.679806  | <b>1e-enamine</b>                                             |   |   |          |           |           |
| 54 | 7 | 0 | -2.534966 | -2.843804 | 0.245671  | M062X/6-31G*                                                  |   |   |          |           |           |
| 55 | 6 | 0 | -1.790573 | -3.888233 | -0.442863 | E(RM062X) = -1662.010234 Hartree                              |   |   |          |           |           |
| 56 | 6 | 0 | -2.749045 | -4.930098 | -1.015121 | EE+Thermal Free Energy of Correction = -1661.617099 Hartree   |   |   |          |           |           |
| 57 | 8 | 0 | -3.748808 | -4.32057  | -1.805418 | -----                                                         |   |   |          |           |           |
| 58 | 6 | 0 | -4.530852 | -3.439555 | -1.016257 | Center    Atomic    Atomic            Coordinates (Angstroms) |   |   |          |           |           |
| 59 | 6 | 0 | -3.67928  | -2.296215 | -0.487055 | Number    Number    Type    X            Y            Z       |   |   |          |           |           |
| 60 | 1 | 0 | -1.13047  | -4.368468 | 0.283637  | -----                                                         |   |   |          |           |           |
| 61 | 1 | 0 | -2.190782 | -5.614308 | -1.655953 | 1                                                             | 7 | 0 | 3.420793 | 0.444591  | 0.662314  |
| 62 | 1 | 0 | -3.207883 | -5.492143 | -0.189488 | 2                                                             | 6 | 0 | 4.331314 | -0.313708 | 1.505768  |
| 63 | 1 | 0 | -5.322462 | -3.048755 | -1.657905 | 3                                                             | 6 | 0 | 3.496317 | -1.527132 | 1.910835  |
| 64 | 1 | 0 | -4.984962 | -3.991848 | -0.180187 | 4                                                             | 6 | 0 | 2.665234 | -1.794589 | 0.650173  |
| 65 | 1 | 0 | -3.309756 | -1.692198 | -1.324301 | 5                                                             | 6 | 0 | 2.343426 | -0.388139 | 0.123243  |
| 66 | 1 | 0 | -4.266316 | -1.657311 | 0.174177  | 6                                                             | 6 | 0 | 0.994656 | 0.141389  | 0.622061  |
| 67 | 6 | 0 | -0.867194 | -3.335563 | -1.533941 | 7                                                             | 1 | 0 | 4.662283 | 0.286711  | 2.360332  |
| 68 | 8 | 0 | -0.161936 | -4.067087 | -2.193812 | 8                                                             | 1 | 0 | 5.230482 | -0.612869 | 0.941264  |
| 69 | 8 | 0 | -0.936633 | -2.024547 | -1.647651 | 9                                                             | 1 | 0 | 2.846547 | -1.266121 | 2.752656  |
| 70 | 1 | 0 | -0.138305 | -1.639731 | -2.102761 | 10                                                            | 1 | 0 | 4.110043 | -2.379072 | 2.208179  |
| 71 | 6 | 0 | 4.176928  | -0.991534 | -0.339599 | 11                                                            | 1 | 0 | 1.762346 | -2.382831 | 0.833416  |
| 72 | 6 | 0 | 3.244781  | -0.419538 | -1.197114 | 12                                                            | 1 | 0 | 3.267182 | -2.33253  | -0.088122 |
| 73 | 7 | 0 | 2.059377  | -1.084942 | -1.386478 | 13                                                            | 1 | 0 | 2.325476 | -0.363546 | -0.972004 |
| 74 | 8 | 0 | 1.264848  | -0.683102 | -2.284236 | 14                                                            | 1 | 0 | 0.888391 | -0.047033 | 1.694659  |
| 75 | 8 | 0 | 1.783768  | -2.066819 | -0.676614 | 15                                                            | 1 | 0 | 0.945802 | 1.22602   | 0.477476  |
| 76 | 1 | 0 | 4.052681  | -2.055152 | -0.161499 | 16                                                            | 6 | 0 | 3.868542 | 1.542348  | -0.047842 |
| 77 | 1 | 0 | 3.361701  | 0.482049  | -1.77876  | 17                                                            | 6 | 0 | 5.047297 | 2.165175  | 0.10159   |
| 78 | 6 | 0 | 5.560811  | -0.481865 | -0.27258  | 18                                                            | 6 | 0 | 5.431972 | 3.381982  | -0.689308 |

|    |    |   |           |           |           |
|----|----|---|-----------|-----------|-----------|
| 19 | 1  | 0 | 5.763533  | 1.794817  | 0.831384  |
| 20 | 1  | 0 | 6.351098  | 3.220004  | -1.263676 |
| 21 | 1  | 0 | 5.61365   | 4.249068  | -0.043711 |
| 22 | 7  | 0 | -0.120668 | -0.508994 | -0.080644 |
| 23 | 6  | 0 | -0.917478 | -1.500539 | 0.561348  |
| 24 | 6  | 0 | -1.145812 | -2.750527 | -0.036948 |
| 25 | 6  | 0 | -1.97883  | -3.670304 | 0.604077  |
| 26 | 6  | 0 | -2.547506 | -3.381192 | 1.838549  |
| 27 | 6  | 0 | -2.307357 | -2.146037 | 2.435698  |
| 28 | 6  | 0 | -1.51105  | -1.205795 | 1.790808  |
| 29 | 6  | 0 | -0.569517 | -3.19183  | -1.346509 |
| 30 | 1  | 0 | -2.160599 | -4.622121 | 0.117442  |
| 31 | 1  | 0 | -3.178165 | -4.113768 | 2.32964   |
| 32 | 1  | 0 | -2.755268 | -1.904062 | 3.393433  |
| 33 | 1  | 0 | -1.352411 | -0.224877 | 2.228655  |
| 34 | 16 | 0 | -0.76244  | 0.295167  | -1.38387  |
| 35 | 8  | 0 | -1.609648 | -0.652915 | -2.096849 |
| 36 | 8  | 0 | 0.353337  | 0.951745  | -2.054669 |
| 37 | 6  | 0 | -1.805747 | 1.550535  | -0.69416  |
| 38 | 8  | 0 | -1.100453 | -4.024905 | -2.046231 |
| 39 | 8  | 0 | 0.616264  | -2.651671 | -1.648489 |
| 40 | 1  | 0 | 0.888346  | -3.02467  | -2.502787 |
| 41 | 6  | 0 | -3.081768 | 1.196407  | -0.252429 |
| 42 | 6  | 0 | -3.871364 | 2.164742  | 0.351689  |
| 43 | 6  | 0 | -3.405271 | 3.475329  | 0.522427  |
| 44 | 6  | 0 | -2.125651 | 3.799949  | 0.065553  |
| 45 | 6  | 0 | -1.316093 | 2.843856  | -0.541416 |
| 46 | 6  | 0 | -4.273466 | 4.504857  | 1.195414  |
| 47 | 1  | 0 | -3.449071 | 0.185585  | -0.398172 |
| 48 | 1  | 0 | -4.869459 | 1.905171  | 0.692171  |
| 49 | 1  | 0 | -1.758203 | 4.815005  | 0.180758  |
| 50 | 1  | 0 | -0.327635 | 3.09713   | -0.909951 |
| 51 | 1  | 0 | -5.287316 | 4.486945  | 0.787824  |
| 52 | 1  | 0 | -3.866419 | 5.509685  | 1.070826  |
| 53 | 1  | 0 | -4.348678 | 4.299772  | 2.267709  |
| 54 | 1  | 0 | 3.146709  | 1.912636  | -0.777161 |
| 55 | 1  | 0 | 4.64242   | 3.654405  | -1.395837 |

**TS-Cat 1e-β-Nitrostyrene**

M062X/6-31G\*

E(RM062X) = -513.928426 Hartree

EE+Thermal Free Energy of Correction = -513.825099 Hartree

-----  
Center    Atomic    Atomic            Coordinates (Angstroms)  
Number    Number    Type        X            Y            Z  
-----

|    |   |   |           |           |           |
|----|---|---|-----------|-----------|-----------|
| 1  | 6 | 0 | -0.634577 | 0.473308  | -0.416008 |
| 2  | 6 | 0 | 0.805097  | 0.206795  | -0.223071 |
| 3  | 6 | 0 | 1.653753  | 1.26444   | 0.125964  |
| 4  | 6 | 0 | 3.011722  | 1.042811  | 0.341774  |
| 5  | 6 | 0 | 3.539107  | -0.237944 | 0.205901  |
| 6  | 6 | 0 | 2.702173  | -1.299137 | -0.142981 |
| 7  | 6 | 0 | 1.347563  | -1.079217 | -0.356124 |
| 8  | 1 | 0 | 1.240739  | 2.261701  | 0.247875  |
| 9  | 1 | 0 | 3.654951  | 1.871742  | 0.617482  |
| 10 | 1 | 0 | 4.597349  | -0.41187  | 0.369724  |
| 11 | 1 | 0 | 3.108551  | -2.299068 | -0.252248 |
| 12 | 1 | 0 | 0.708091  | -1.912381 | -0.634078 |
| 13 | 6 | 0 | -1.578671 | -0.452045 | 0.005595  |
| 14 | 7 | 0 | -2.895542 | -0.069267 | 0.0764    |
| 15 | 8 | 0 | -3.723749 | -0.869074 | 0.587631  |
| 16 | 8 | 0 | -3.250235 | 1.044912  | -0.349413 |
| 17 | 1 | 0 | -0.941625 | 1.51405   | -0.374046 |
| 18 | 1 | 0 | -1.384387 | -1.460072 | 0.338446  |

**TS-Cat 1e-enamine**

M062X/6-31G\*

E(RM062X) = -1661.992319 Hartree

EE+Thermal Free Energy of Correction = -1661.595543 Hartree

-----  
Center    Atomic    Atomic            Coordinates (Angstroms)  
Number    Number    Type        X            Y            Z  
-----

|   |   |   |         |           |          |
|---|---|---|---------|-----------|----------|
| 1 | 7 | 0 | 3.50568 | -0.100132 | 0.303374 |
|---|---|---|---------|-----------|----------|

|    |    |   |           |           |           |                                                             |        |        |                         |           |           |
|----|----|---|-----------|-----------|-----------|-------------------------------------------------------------|--------|--------|-------------------------|-----------|-----------|
| 2  | 6  | 0 | 3.784438  | 1.176743  | 0.030991  | 40                                                          | 1      | 0      | -0.461722               | 0.72988   | 2.372594  |
| 3  | 6  | 0 | 4.878205  | 1.866504  | 0.520436  | 41                                                          | 6      | 0      | -2.851163               | 1.159914  | -0.844016 |
| 4  | 6  | 0 | 5.203864  | 3.231784  | -0.020137 | 42                                                          | 6      | 0      | -3.657286               | 1.98536   | -0.072626 |
| 5  | 1  | 0 | 5.704513  | 1.279172  | 0.912114  | 43                                                          | 6      | 0      | -3.126175               | 3.102281  | 0.584949  |
| 6  | 1  | 0 | 5.719348  | 3.841108  | 0.728416  | 44                                                          | 6      | 0      | -1.76519                | 3.386548  | 0.442161  |
| 7  | 1  | 0 | 5.862721  | 3.170921  | -0.89222  | 45                                                          | 6      | 0      | -0.939559               | 2.574192  | -0.326791 |
| 8  | 6  | 0 | 4.433746  | -1.011325 | 0.981115  | 46                                                          | 6      | 0      | -4.009496               | 3.967153  | 1.444692  |
| 9  | 6  | 0 | 3.629186  | -2.305511 | 1.070389  | 47                                                          | 1      | 0      | -3.260548               | 0.295577  | -1.357102 |
| 10 | 6  | 0 | 2.845992  | -2.303122 | -0.24856  | 48                                                          | 1      | 0      | -4.716319               | 1.763707  | 0.022342  |
| 11 | 6  | 0 | 2.450005  | -0.833118 | -0.430944 | 49                                                          | 1      | 0      | -1.344377               | 4.253841  | 0.942139  |
| 12 | 1  | 0 | 4.723598  | -0.607234 | 1.952027  | 50                                                          | 1      | 0      | 0.119594                | 2.785699  | -0.425626 |
| 13 | 1  | 0 | 5.33864   | -1.136736 | 0.370434  | 51                                                          | 1      | 0      | -4.982279               | 4.126784  | 0.973526  |
| 14 | 1  | 0 | 2.948592  | -2.254913 | 1.926627  | 52                                                          | 1      | 0      | -3.549939               | 4.938992  | 1.633743  |
| 15 | 1  | 0 | 4.266344  | -3.182259 | 1.189517  | 53                                                          | 1      | 0      | -4.188464               | 3.486213  | 2.411547  |
| 16 | 1  | 0 | 1.967882  | -2.954042 | -0.236961 | 54                                                          | 1      | 0      | 4.293295                | 3.758564  | -0.321183 |
| 17 | 1  | 0 | 3.495958  | -2.621089 | -1.068374 | 55                                                          | 1      | 0      | 3.034913                | 1.685335  | -0.575438 |
| 18 | 1  | 0 | 2.458338  | -0.526967 | -1.478565 | -----                                                       |        |        |                         |           |           |
| 19 | 6  | 0 | 1.090738  | -0.49139  | 0.177252  |                                                             |        |        |                         |           |           |
| 20 | 1  | 0 | 0.969559  | -1.046106 | 1.111179  | <b>TS-Cat 1c</b>                                            |        |        |                         |           |           |
| 21 | 1  | 0 | 1.04466   | 0.571546  | 0.427442  | M062X/6-31G*                                                |        |        |                         |           |           |
| 22 | 7  | 0 | -0.009196 | -0.851102 | -0.733118 | E(RM062X) = -2175.965255 Hartree                            |        |        |                         |           |           |
| 23 | 6  | 0 | -1.019112 | -1.799251 | -0.362564 | EE+Thermal Free Energy of Correction = -2175.439920 Hartree |        |        |                         |           |           |
| 24 | 6  | 0 | -1.389613 | -2.74375  | -1.325188 | -----                                                       |        |        |                         |           |           |
| 25 | 6  | 0 | -2.346248 | -3.711561 | -1.04386  | Center                                                      | Atomic | Atomic | Coordinates (Angstroms) |           |           |
| 26 | 6  | 0 | -2.918026 | -3.781536 | 0.224534  | Number                                                      | Number | Type   | X                       | Y         | Z         |
| 27 | 6  | 0 | -2.527776 | -2.871847 | 1.197622  | -----                                                       |        |        |                         |           |           |
| 28 | 6  | 0 | -1.608505 | -1.857829 | 0.914777  | 1                                                           | 7      | 0      | -1.626871               | -1.552387 | 0.963205  |
| 29 | 1  | 0 | -0.907169 | -2.703729 | -2.293996 | 2                                                           | 6      | 0      | -2.156412               | -0.528817 | 1.637147  |
| 30 | 1  | 0 | -2.623724 | -4.427482 | -1.810105 | 3                                                           | 6      | 0      | -3.504312               | -0.223284 | 1.675451  |
| 31 | 1  | 0 | -3.649812 | -4.547239 | 0.45699   | 4                                                           | 6      | 0      | -4.00687                | 0.821557  | 2.633578  |
| 32 | 1  | 0 | -2.938844 | -2.920568 | 2.200379  | 5                                                           | 1      | 0      | -4.201788               | -1.004199 | 1.384156  |
| 33 | 6  | 0 | -1.256575 | -0.952581 | 2.057734  | 6                                                           | 1      | 0      | -4.909447               | 1.307754  | 2.251089  |
| 34 | 16 | 0 | -0.441895 | 0.351812  | -1.826029 | 7                                                           | 1      | 0      | -4.265116               | 0.384853  | 3.60359   |
| 35 | 8  | 0 | -1.217251 | -0.282094 | -2.883632 | 8                                                           | 6      | 0      | -2.419747               | -2.622254 | 0.348677  |
| 36 | 8  | 0 | 0.801256  | 1.048336  | -2.146271 | 9                                                           | 6      | 0      | -1.35384                | -3.496611 | -0.306721 |
| 37 | 6  | 0 | -1.497683 | 1.47075   | -0.96264  | 10                                                          | 6      | 0      | -0.193445               | -3.413926 | 0.693114  |
| 38 | 8  | 0 | -1.152473 | -1.366546 | 3.193411  | 11                                                          | 6      | 0      | -0.213394               | -1.950273 | 1.149518  |
| 39 | 8  | 0 | -1.075585 | 0.315333  | 1.711149  | 12                                                          | 1      | 0      | -3.139901               | -2.205626 | -0.356853 |

|    |   |   |           |           |           |       |    |   |           |           |           |
|----|---|---|-----------|-----------|-----------|-------|----|---|-----------|-----------|-----------|
| 13 | 1 | 0 | -2.969553 | -3.167541 | 1.128336  | 45    | 6  | 0 | 4.231705  | -1.723381 | -2.282181 |
| 14 | 1 | 0 | -1.067664 | -3.063793 | -1.270922 | 46    | 6  | 0 | 3.215498  | -1.178553 | -1.492384 |
| 15 | 1 | 0 | -1.701363 | -4.515891 | -0.477442 | 47    | 1  | 0 | 3.978258  | -2.719308 | 1.431297  |
| 16 | 1 | 0 | 0.774492  | -3.684258 | 0.263083  | 48    | 1  | 0 | 5.841159  | -3.588214 | 0.043262  |
| 17 | 1 | 0 | -0.386066 | -4.074567 | 1.542881  | 49    | 1  | 0 | 5.985647  | -2.960924 | -2.363509 |
| 18 | 1 | 0 | 0.05878   | -1.838545 | 2.200587  | 50    | 1  | 0 | 4.256399  | -1.457819 | -3.333722 |
| 19 | 6 | 0 | 0.676301  | -1.039599 | 0.304887  | 51    | 6  | 0 | 2.230894  | -0.298628 | -2.203697 |
| 20 | 1 | 0 | 0.618118  | -1.35532  | -0.739885 | 52    | 16 | 0 | 2.494283  | -0.01846  | 1.955737  |
| 21 | 1 | 0 | 0.31366   | -0.009511 | 0.349169  | 53    | 8  | 0 | 3.743958  | -0.480135 | 2.544554  |
| 22 | 6 | 0 | -3.73978  | 0.819946  | -0.283323 | 54    | 8  | 0 | 1.298053  | 0.110159  | 2.783757  |
| 23 | 6 | 0 | -5.182156 | 0.571771  | -0.480488 | 55    | 6  | 0 | 2.794128  | 1.532417  | 1.170228  |
| 24 | 6 | 0 | -6.102415 | 1.553071  | -0.092123 | 56    | 8  | 0 | 1.859796  | -0.53667  | -3.334002 |
| 25 | 6 | 0 | -7.468007 | 1.36249   | -0.288619 | 57    | 8  | 0 | 1.816981  | 0.74108   | -1.490838 |
| 26 | 6 | 0 | -7.930903 | 0.186149  | -0.870752 | 58    | 1  | 0 | 0.915648  | 0.998812  | -1.818495 |
| 27 | 6 | 0 | -7.022171 | -0.799103 | -1.260356 | 59    | 6  | 0 | 4.045185  | 1.765888  | 0.601944  |
| 28 | 6 | 0 | -5.660172 | -0.608736 | -1.066751 | 60    | 6  | 0 | 4.24304   | 2.941292  | -0.109053 |
| 29 | 1 | 0 | -5.741563 | 2.478382  | 0.347829  | 61    | 6  | 0 | 3.208291  | 3.872247  | -0.26594  |
| 30 | 1 | 0 | -8.167784 | 2.134923  | 0.012289  | 62    | 6  | 0 | 1.966993  | 3.607853  | 0.31951   |
| 31 | 1 | 0 | -8.994523 | 0.034173  | -1.021023 | 63    | 6  | 0 | 1.747088  | 2.437625  | 1.037204  |
| 32 | 1 | 0 | -7.377861 | -1.718799 | -1.712671 | 64    | 6  | 0 | 3.43172   | 5.126212  | -1.069101 |
| 33 | 1 | 0 | -4.963709 | -1.386269 | -1.36796  | 65    | 1  | 0 | 4.845987  | 1.044198  | 0.727688  |
| 34 | 6 | 0 | -2.82163  | 0.392496  | -1.231811 | 66    | 1  | 0 | 5.21478   | 3.144059  | -0.549854 |
| 35 | 7 | 0 | -1.536676 | 0.873294  | -1.173438 | 67    | 1  | 0 | 1.159809  | 4.325961  | 0.209815  |
| 36 | 8 | 0 | -0.748564 | 0.588151  | -2.113942 | 68    | 1  | 0 | 0.779615  | 2.224909  | 1.478857  |
| 37 | 8 | 0 | -1.172154 | 1.578554  | -0.215184 | 69    | 1  | 0 | 4.414033  | 5.556881  | -0.860847 |
| 38 | 1 | 0 | -3.475996 | 1.725334  | 0.255077  | 70    | 1  | 0 | 2.669079  | 5.876629  | -0.853098 |
| 39 | 1 | 0 | -3.019522 | -0.262989 | -2.065977 | 71    | 1  | 0 | 3.3913    | 4.904591  | -2.140265 |
| 40 | 7 | 0 | 2.080628  | -1.107103 | 0.7423    | 72    | 1  | 0 | -3.248723 | 1.592431  | 2.80159   |
| 41 | 6 | 0 | 3.126729  | -1.544291 | -0.135634 | 73    | 1  | 0 | -1.427808 | 0.117703  | 2.126388  |
| 42 | 6 | 0 | 4.0757    | -2.424808 | 0.393647  | ----- |    |   |           |           |           |
| 43 | 6 | 0 | 5.111897  | -2.913768 | -0.392589 |       |    |   |           |           |           |
| 44 | 6 | 0 | 5.191578  | -2.566383 | -1.739298 |       |    |   |           |           |           |

## 7. References.

- (1) A. Castán, R. Badorrey, J. A. Gálvez, P. López-Ram-de-Víu, M. D. Díaz-de-Villegas, *Org. Biomol. Chem.* **2018**, *16*, 924-935.
- (2) N. Kaplaneris, G. Koutoulogenis, M. Raftopoulou, C. G. Kokotos, *J. Org. Chem.* **2015**, *80*, 5464-5473.
- (3) A. Kamal, M. Sathish, V. Srinivasulu, J. Chetna, K. C. Shekar, S. Nekkanti, Y. Tangella, N. Shankaraiah, *Org. Biomol. Chem.* **2014**, *12*, 8008-8018.
- (4) B. Tan, X. Zeng, Y. Lu, P. J. Chua, G. Zhong, *Org. Lett.* **2009**, *11*, 1927-1930.
- (5) C. S. Azad, I. A. Khan, A. K. Narula, *Org. Biomol. Chem.* **2016**, *14*, 11454-11461.
- (6) A. Lu, R. Wu, Y. Wang, Z. Zhou, G. Wu, J. Fang, C. Tang, *Eur. J. Org. Chem.* **2010**, 2057-2061.
- (7) Y. Cao, Y. Lai, X. Wang, Y. Li, W. Xiao, *Tetrahedron Lett.* **2007**, *48*, 21-24.
- (8) J. Borges-González, I. García-Monzón, T. Martín, *Adv. Synth. Catal.* **2019**, *361*, 2141-2147.
- (9) D. Lu, Y. Gong, W. Wang, *Adv. Synth. Catal.* **2010**, *352*, 644-650.
- (10) S. Belot, A. Quintard, N. Krause, A. Alexakis, *Adv. Synth. Catal.* **2010**, *352*, 667-695.
- (11) S. Zhu, S. Yu, D. Ma, *Angew. Chem. Int. Ed.* **2008**, *47*, 545-548.
- (12) Gaussian 16, Revision B.01, M. J. Frisch, G. W. Trucks, H. B. Schlegel, G. E. Scuseria, M. A. Robb, J. R. Cheeseman, G. Scalmani, V. Barone, G. A. Petersson, H. Nakatsuji, X. Li, M. Caricato, A. V. Marenich, J. Bloino, B. G. Janesko, R. Gomperts, B. Mennucci, H. P. Hratchian, J. V. Ortiz, A. F. Izmaylov, J. L. Sonnenberg, D. Williams-Young, F. Ding, F. Lipparini, F. Egidi, J. Goings, B. Peng, A. Petrone, T. Henderson, D. Ranasinghe, V. G. Zakrzewski, J. Gao, N. Rega, G. Zheng, W. Liang, M. Hada, M. Ehara, K. Toyota, R. Fukuda, J. Hasegawa, M. Ishida, T. Nakajima, Y. Honda, O. Kitao, H. Nakai, T. Vreven, K. Throssell, J. A. Montgomery, Jr., J. E. Peralta, F. Ogliaro, M. J. Bearpark, J. J. Heyd, E. N. Brothers, K. N. Kudin, V. N. Staroverov, T. A. Keith, R. Kobayashi, J. Normand, K. Raghavachari, A. P. Rendell, J. C. Burant, S. S. Iyengar, J. Tomasi, M. Cossi, J. M. Millam, M. Klene, C. Adamo, R. Cammi, J. W. Ochterski, R. L. Martin, K. Morokuma, O. Farkas, J. B. Foresman, and D. J. Fox, Gaussian, Inc., Wallingford CT, 2016.

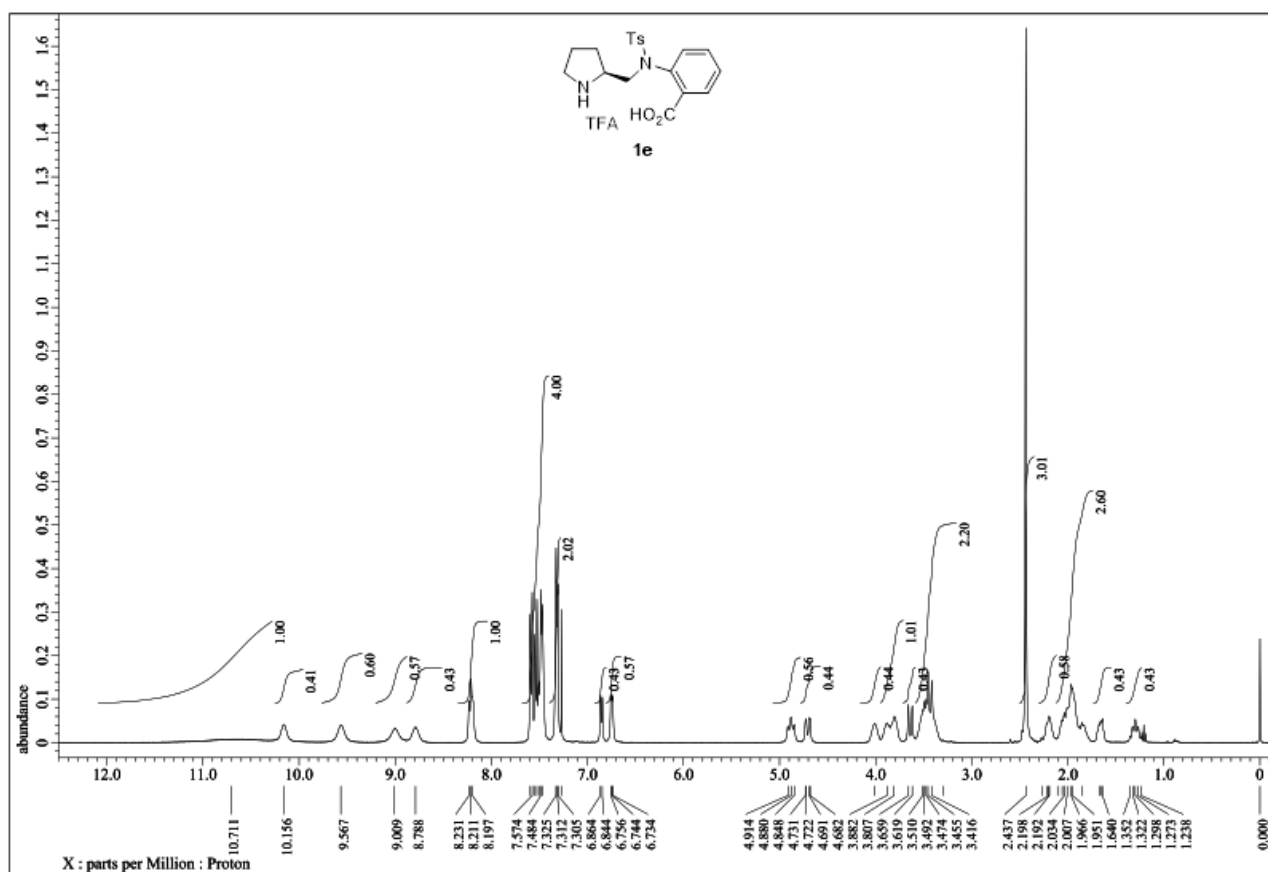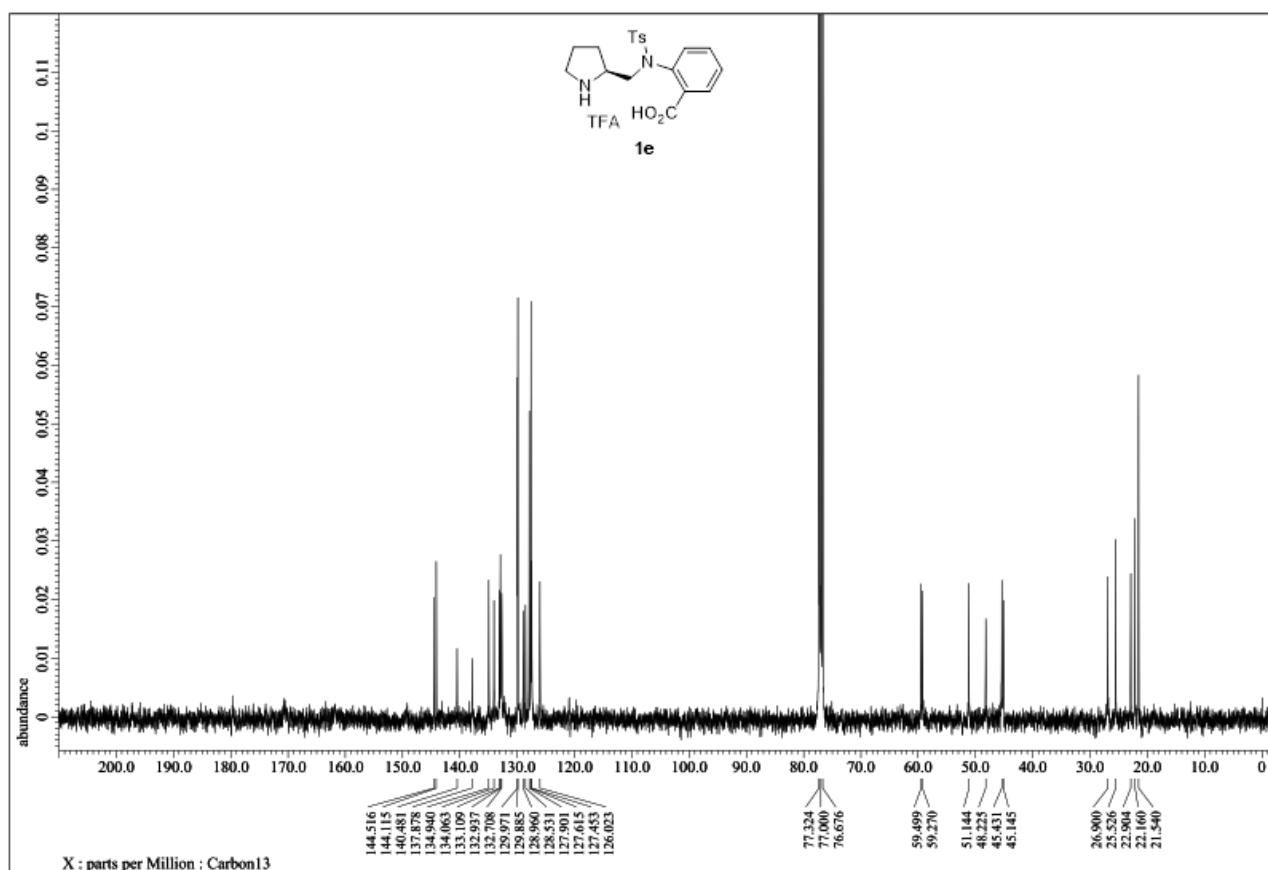

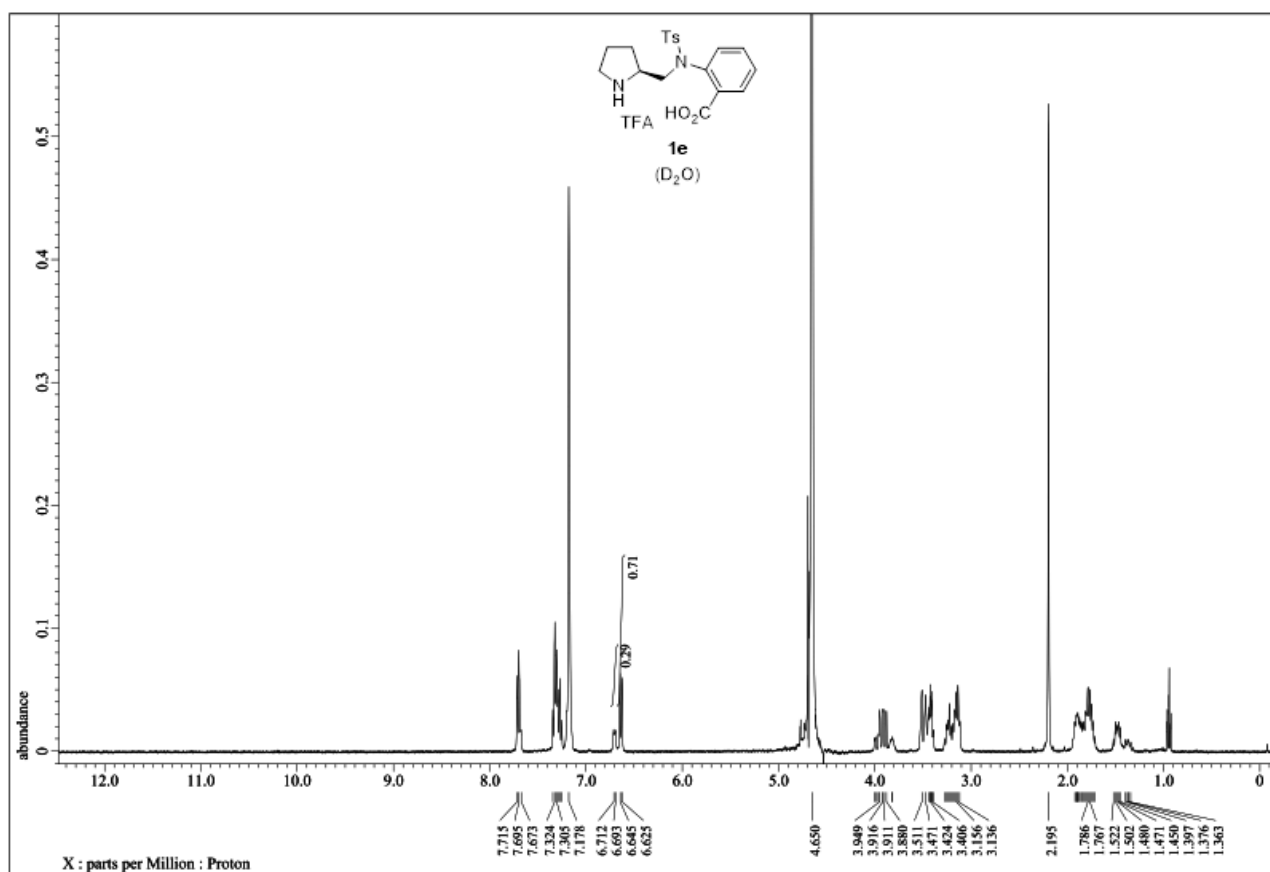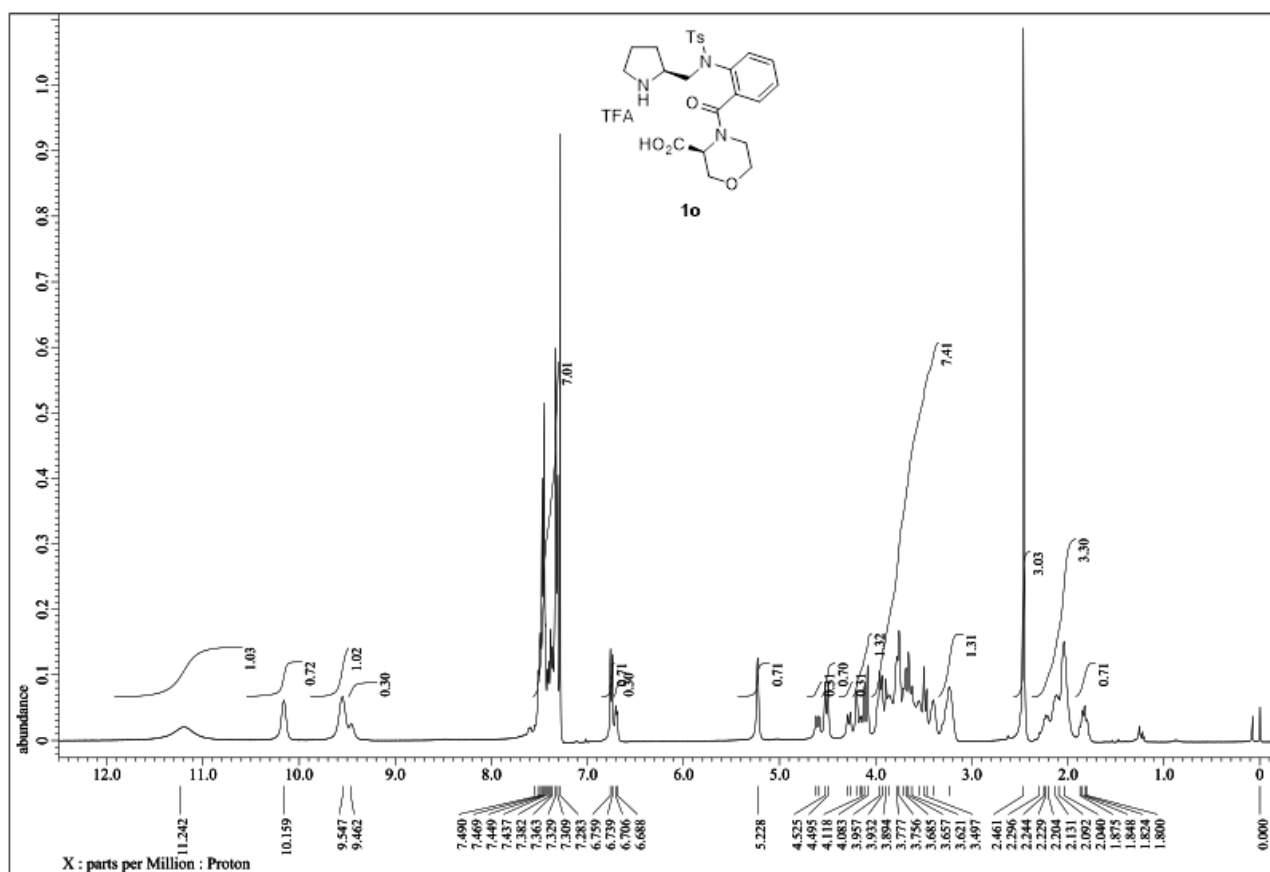

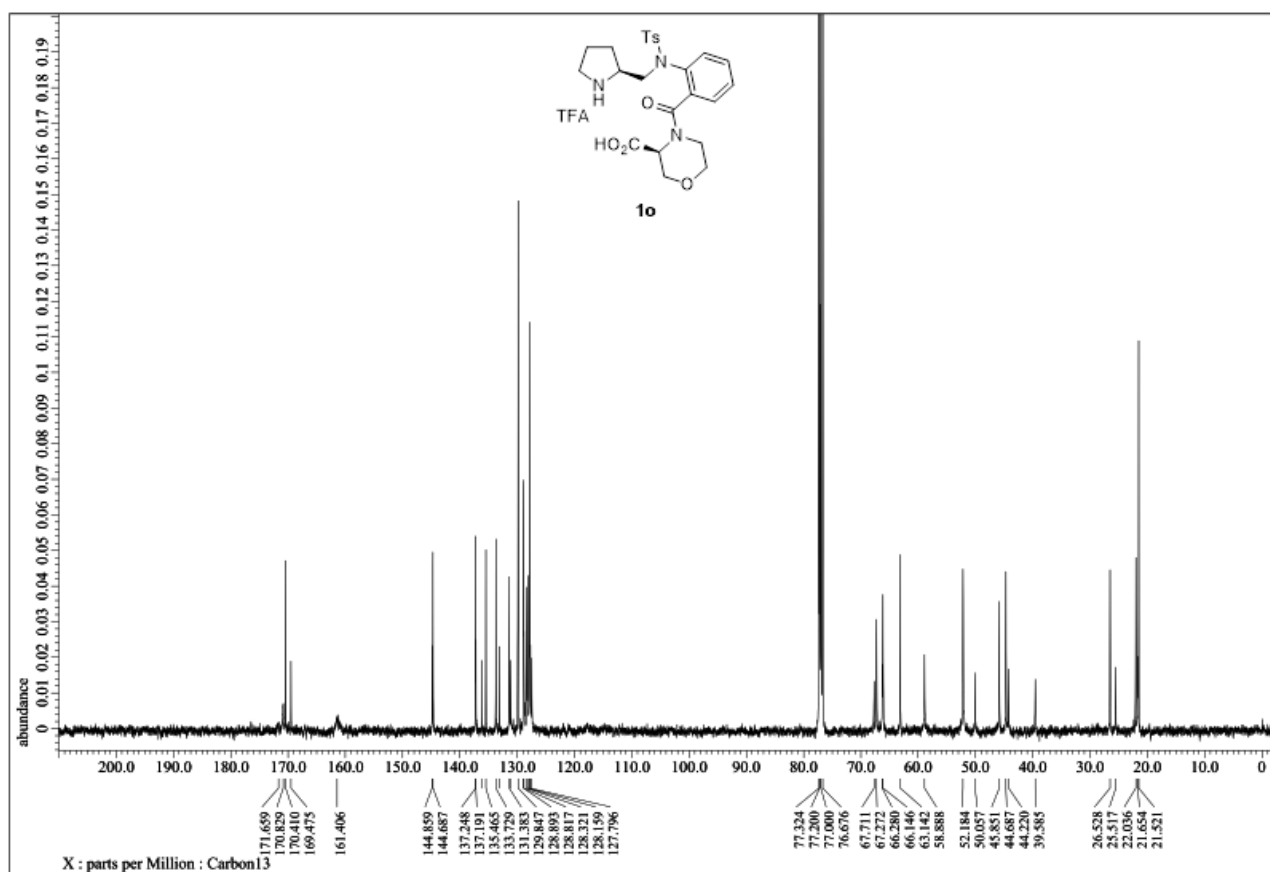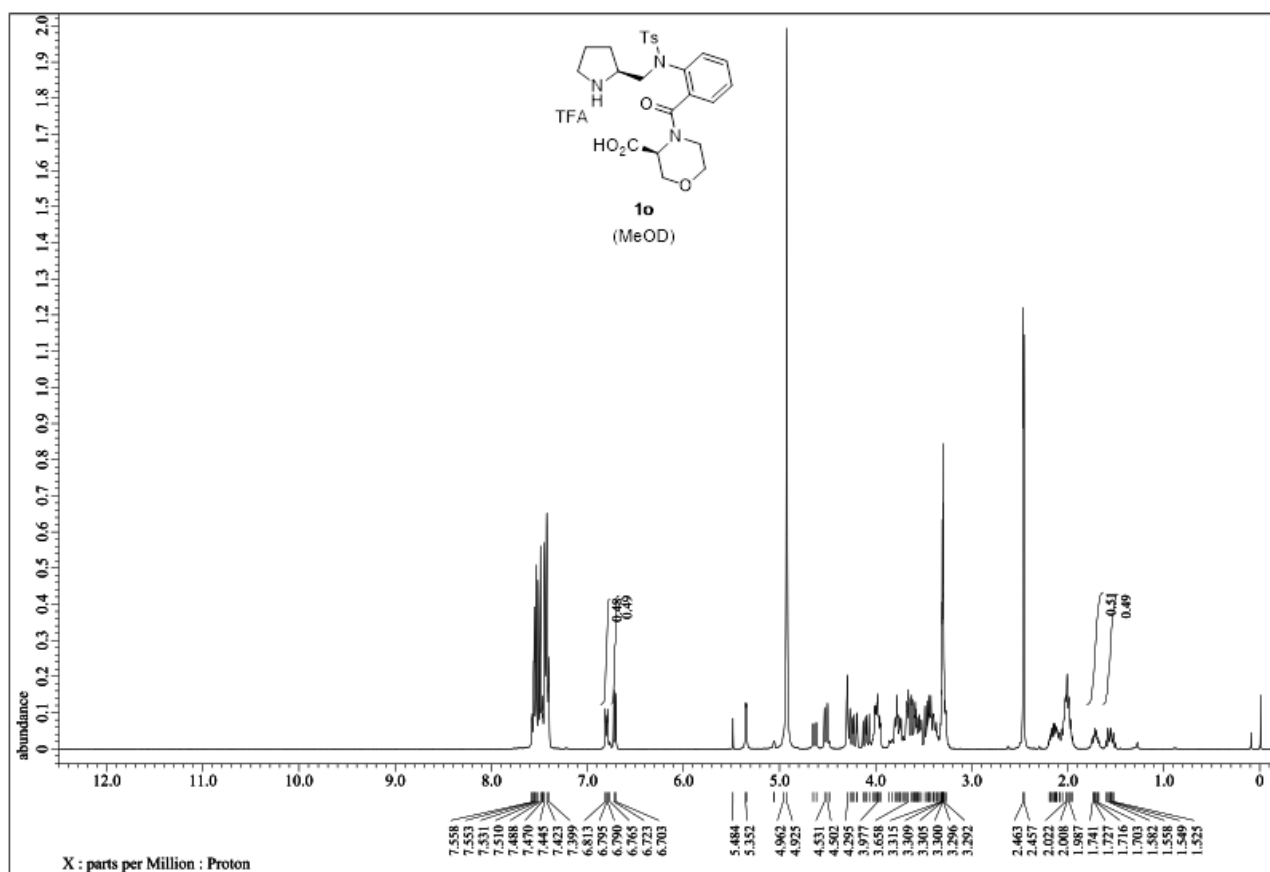



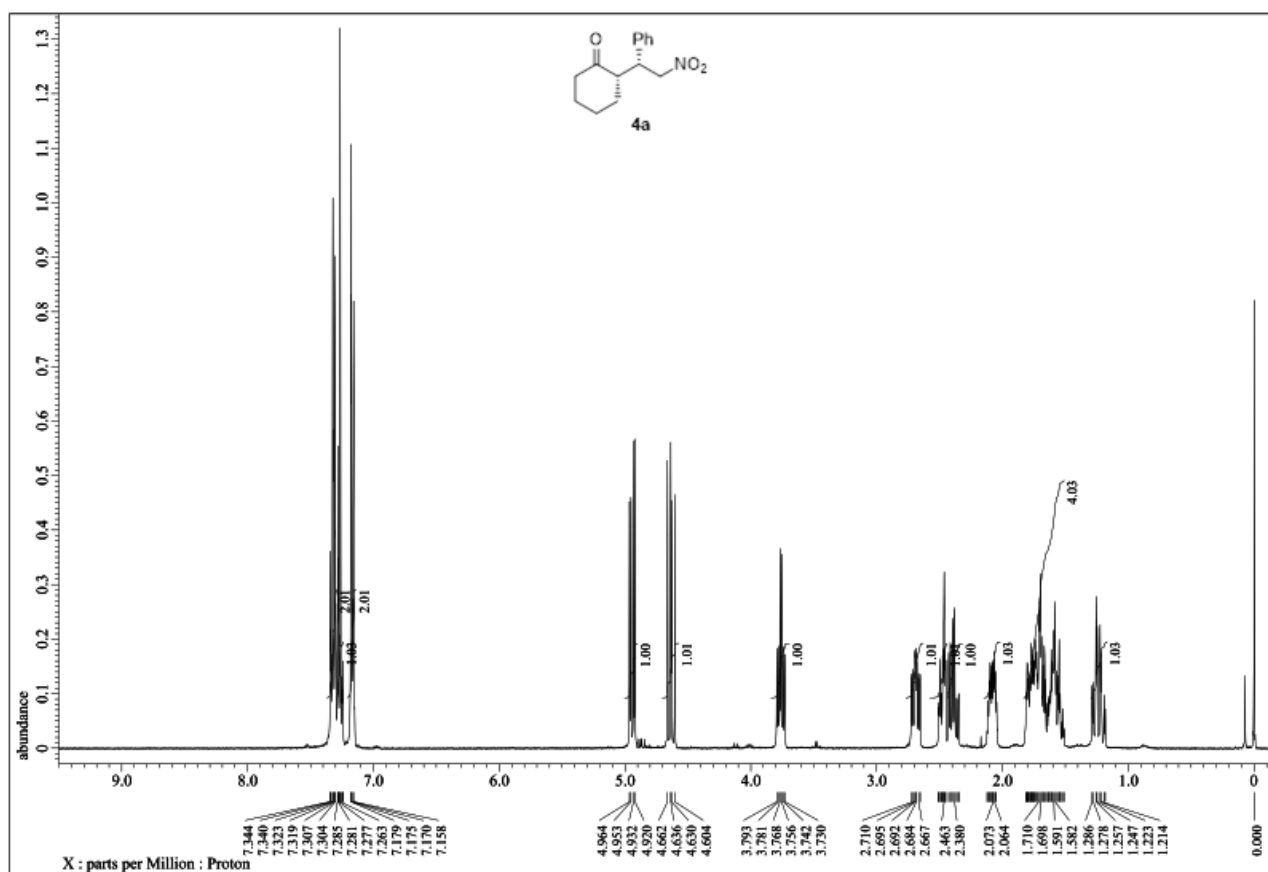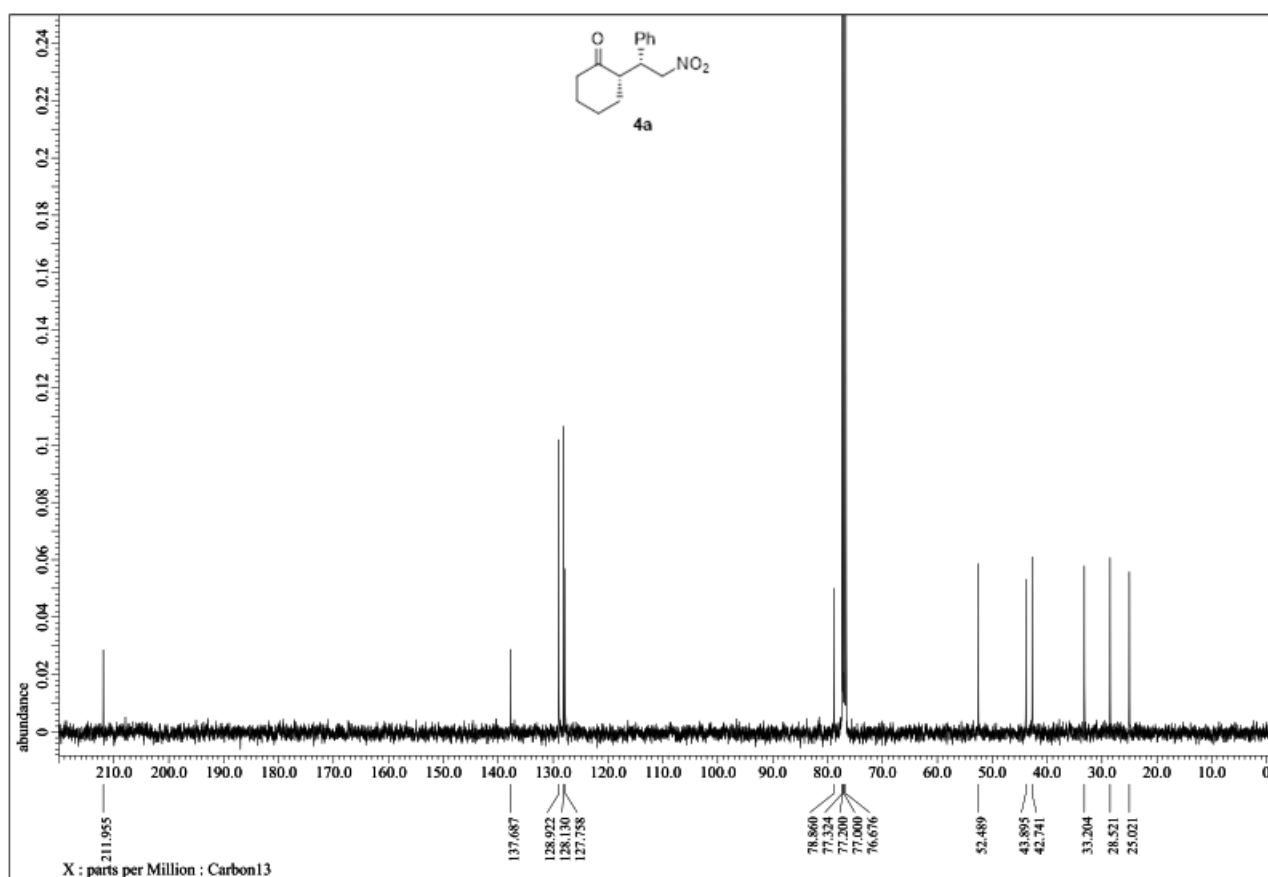

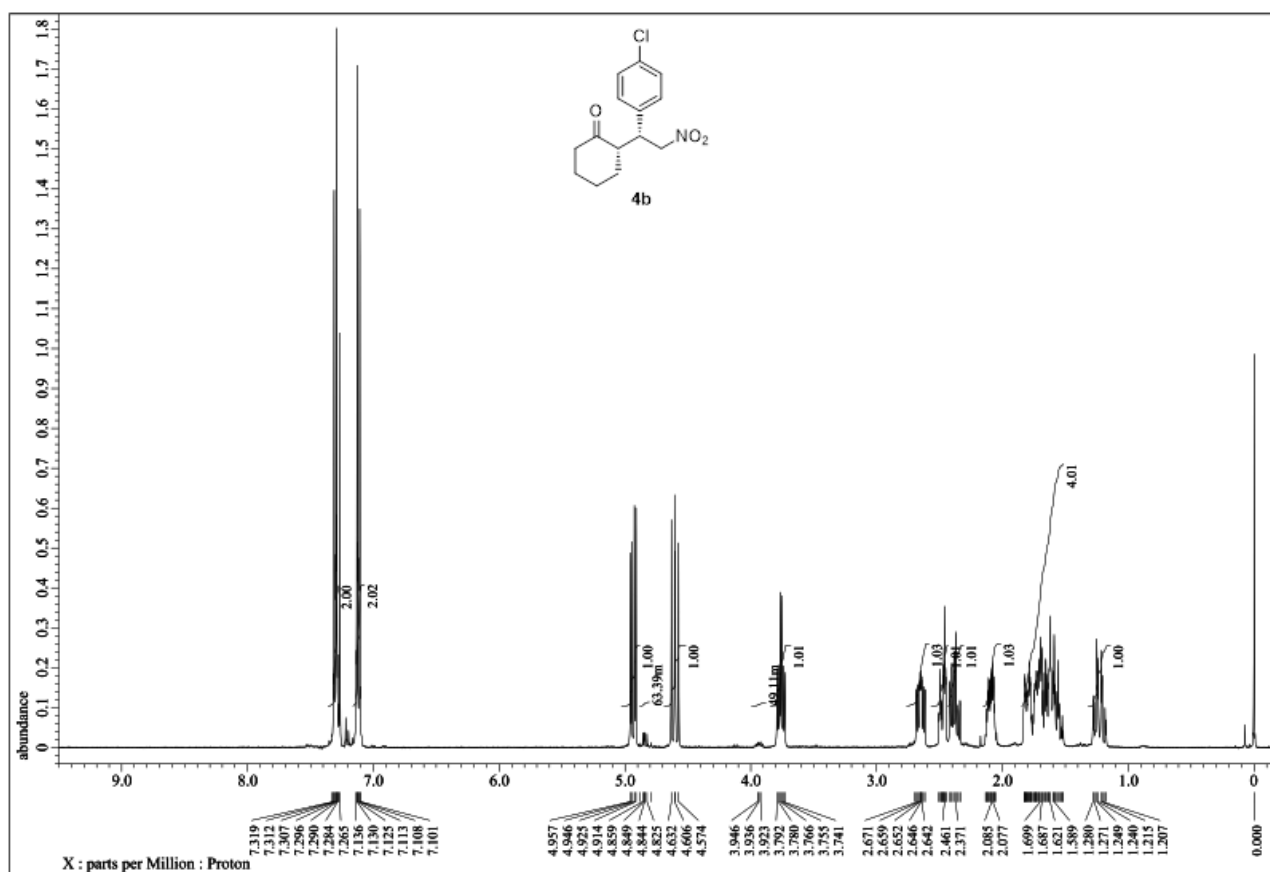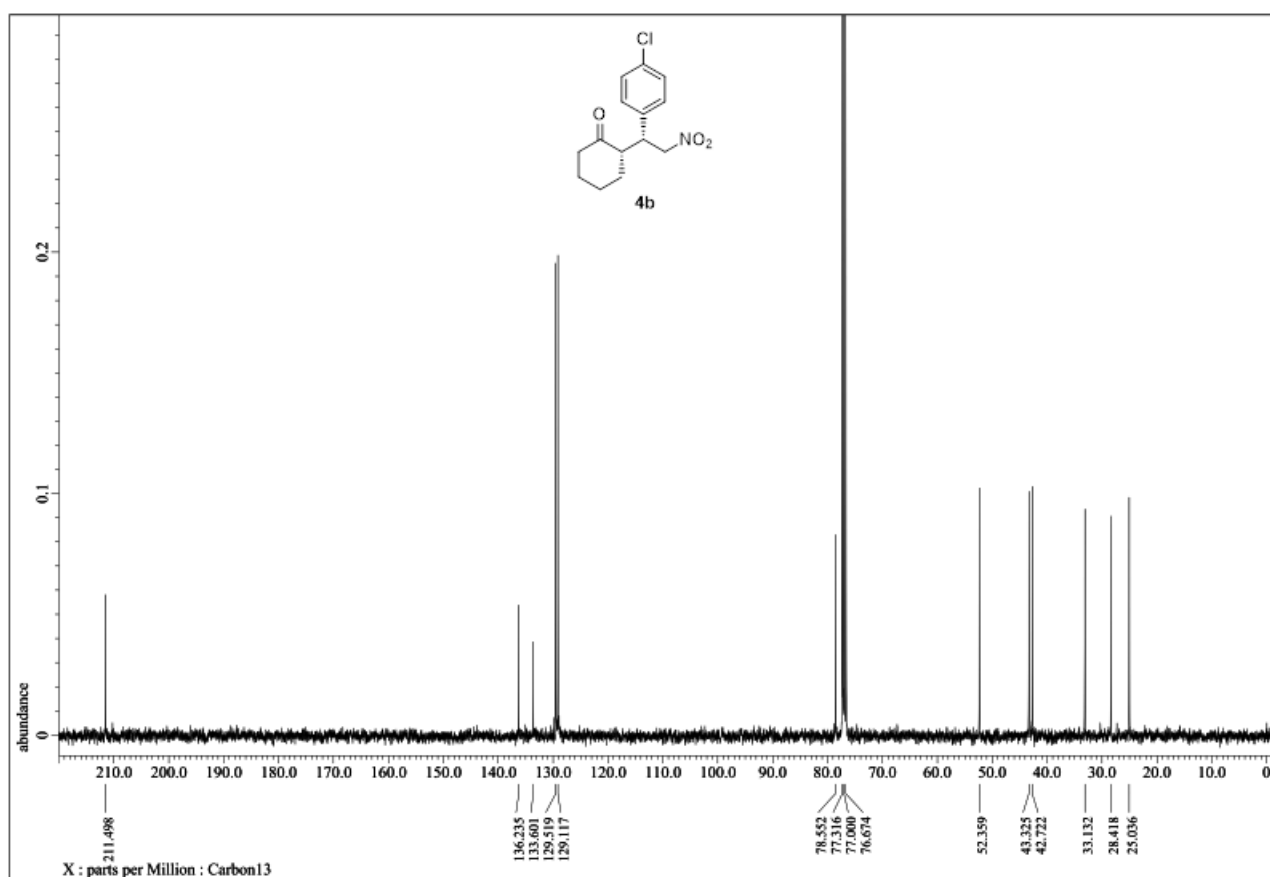

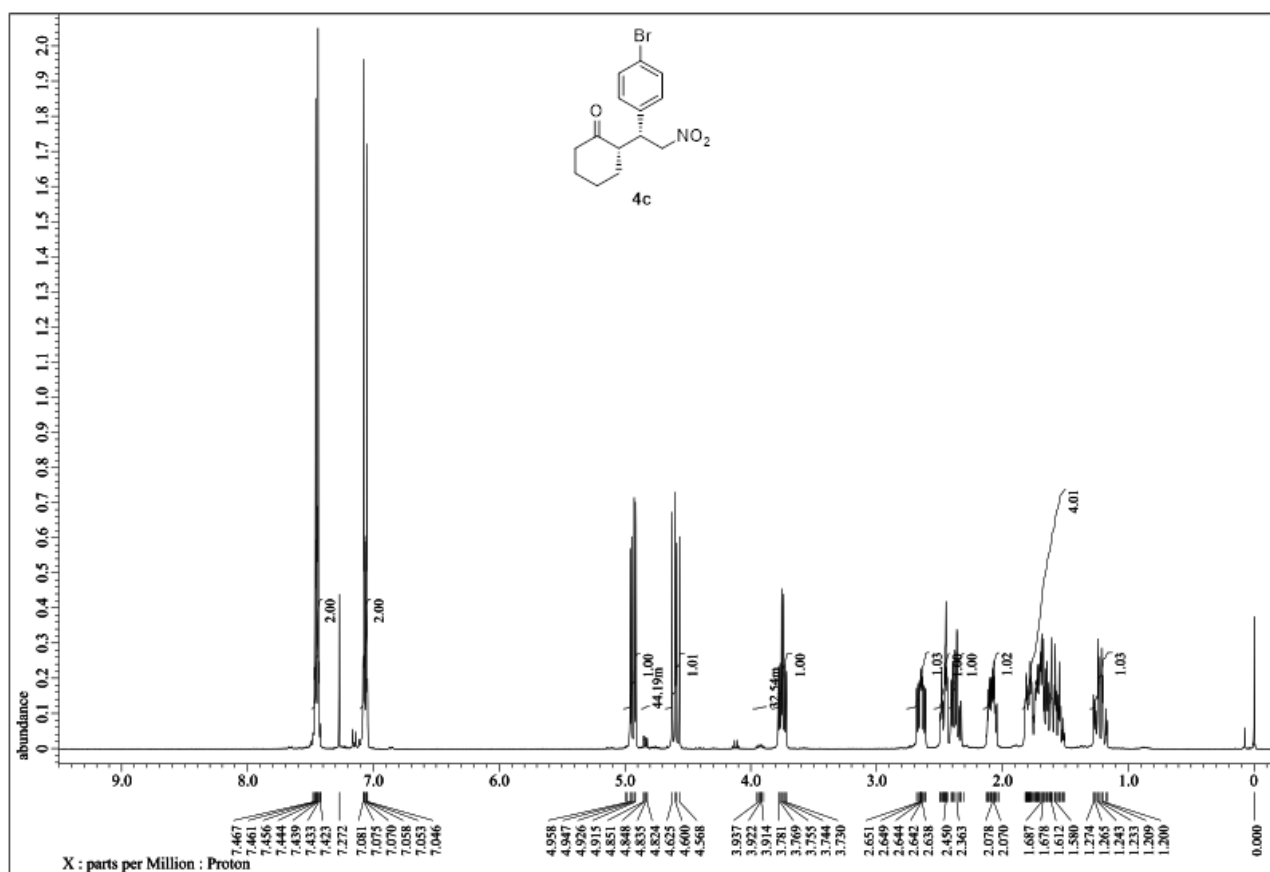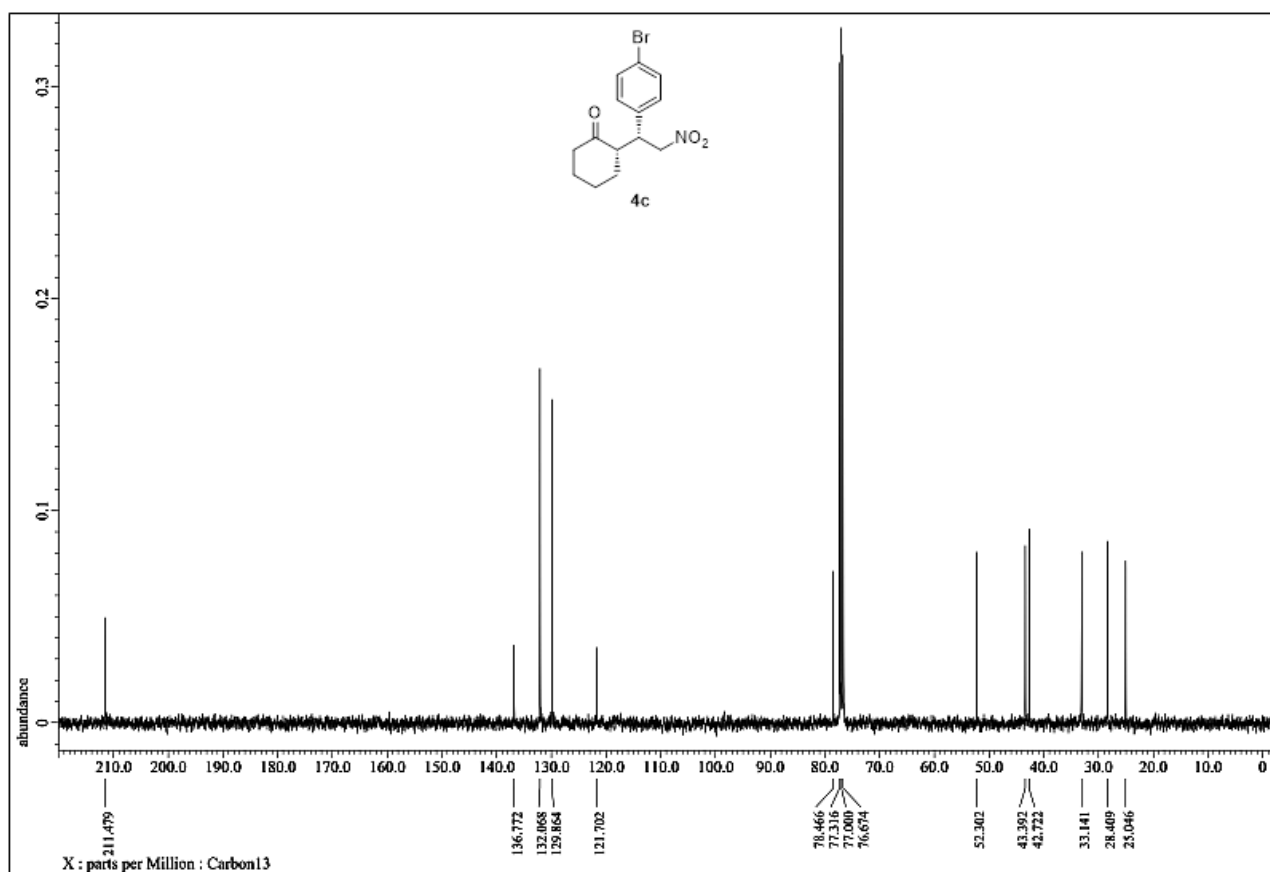

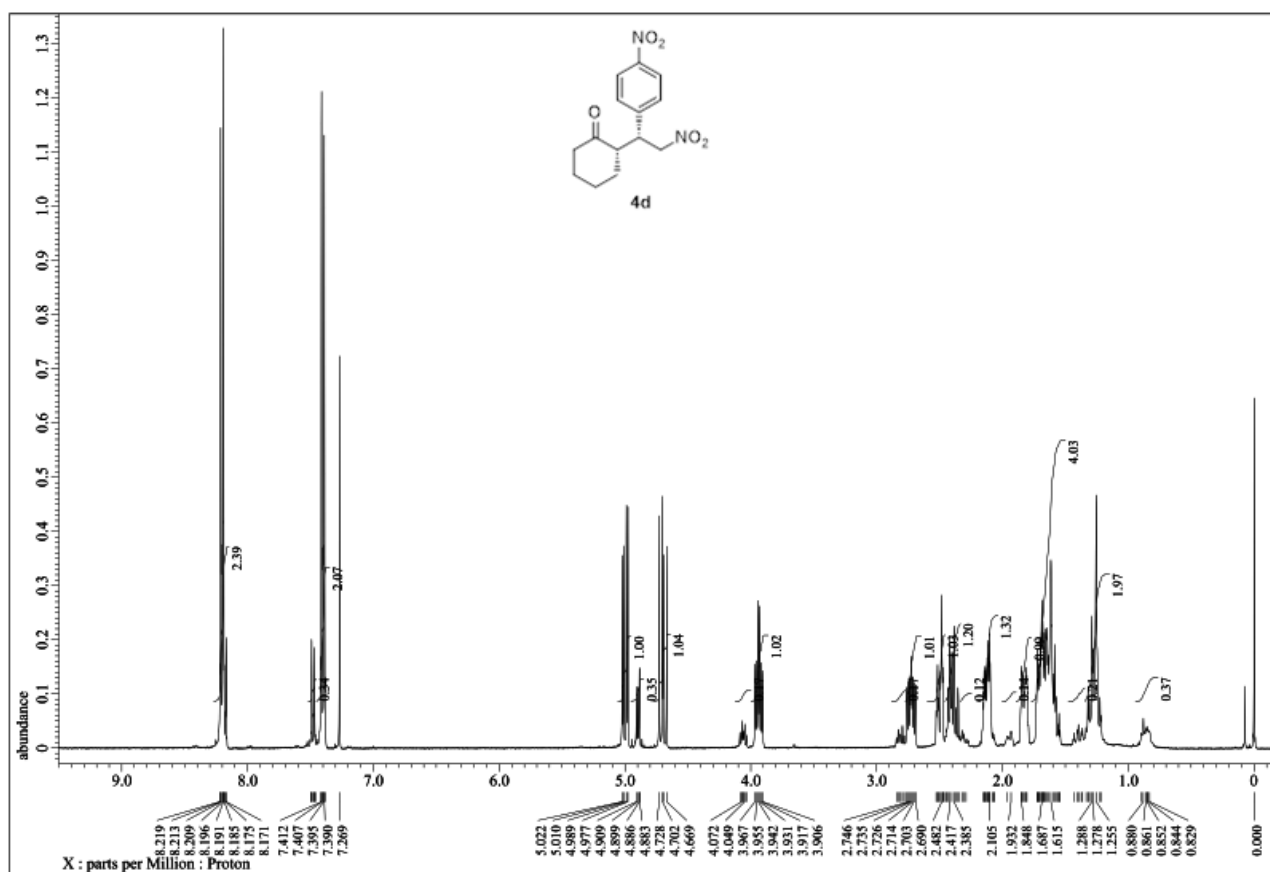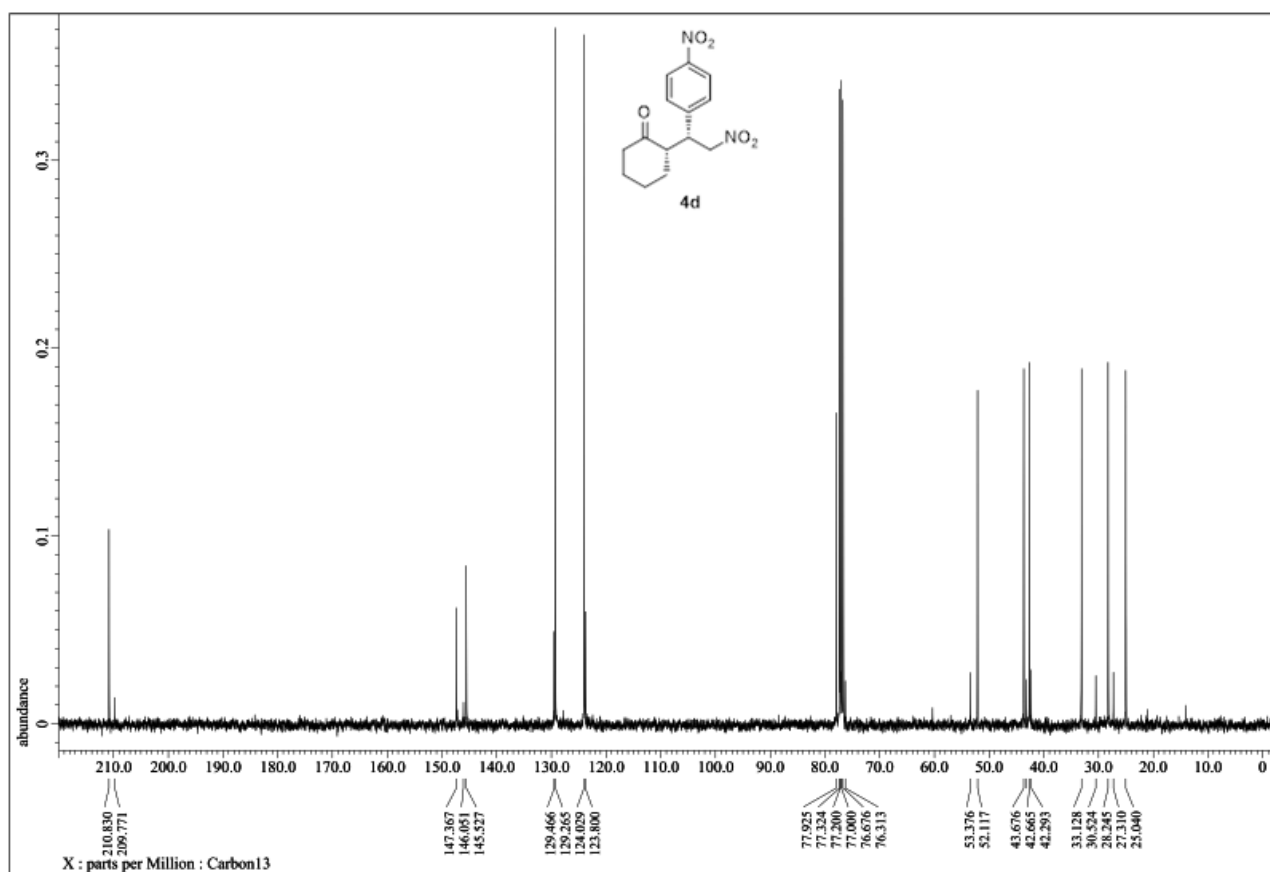

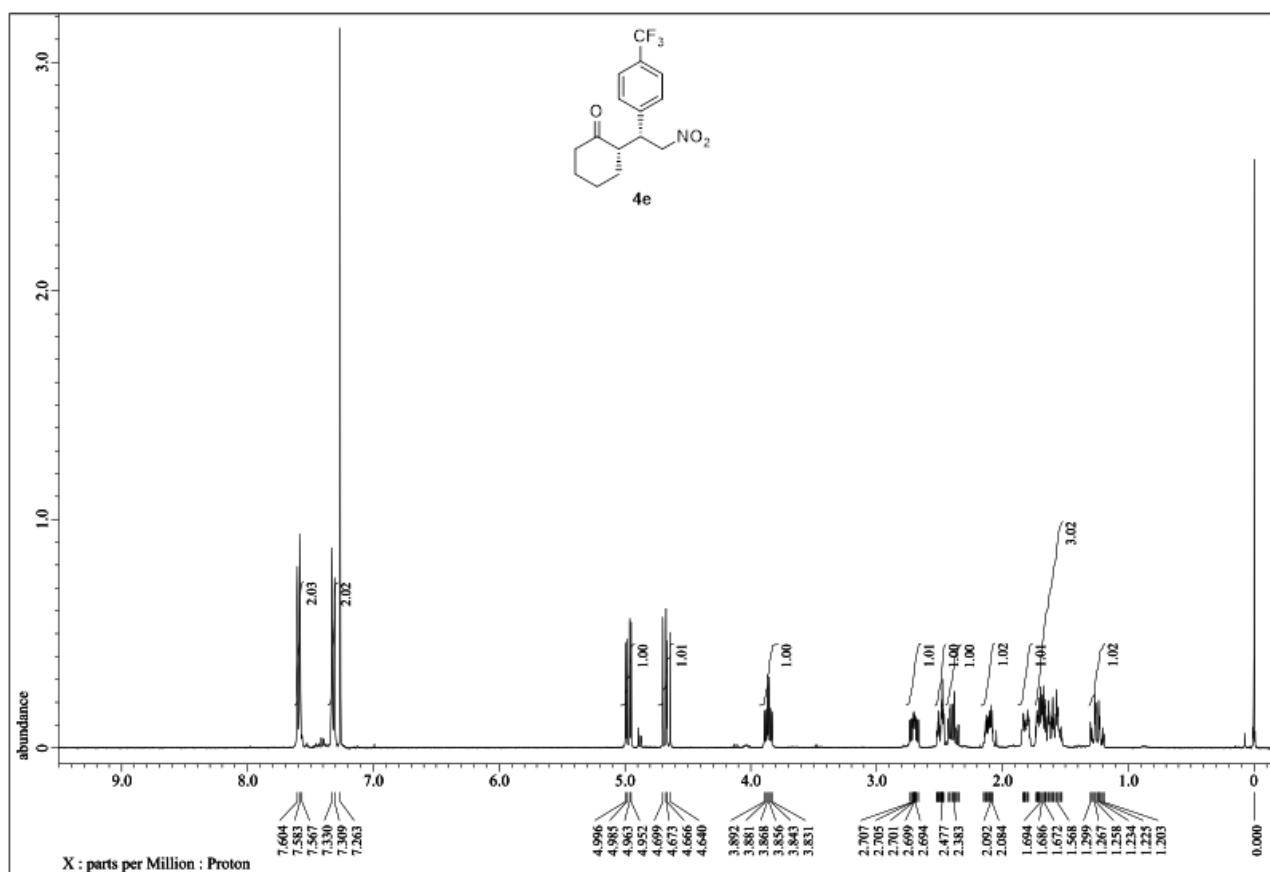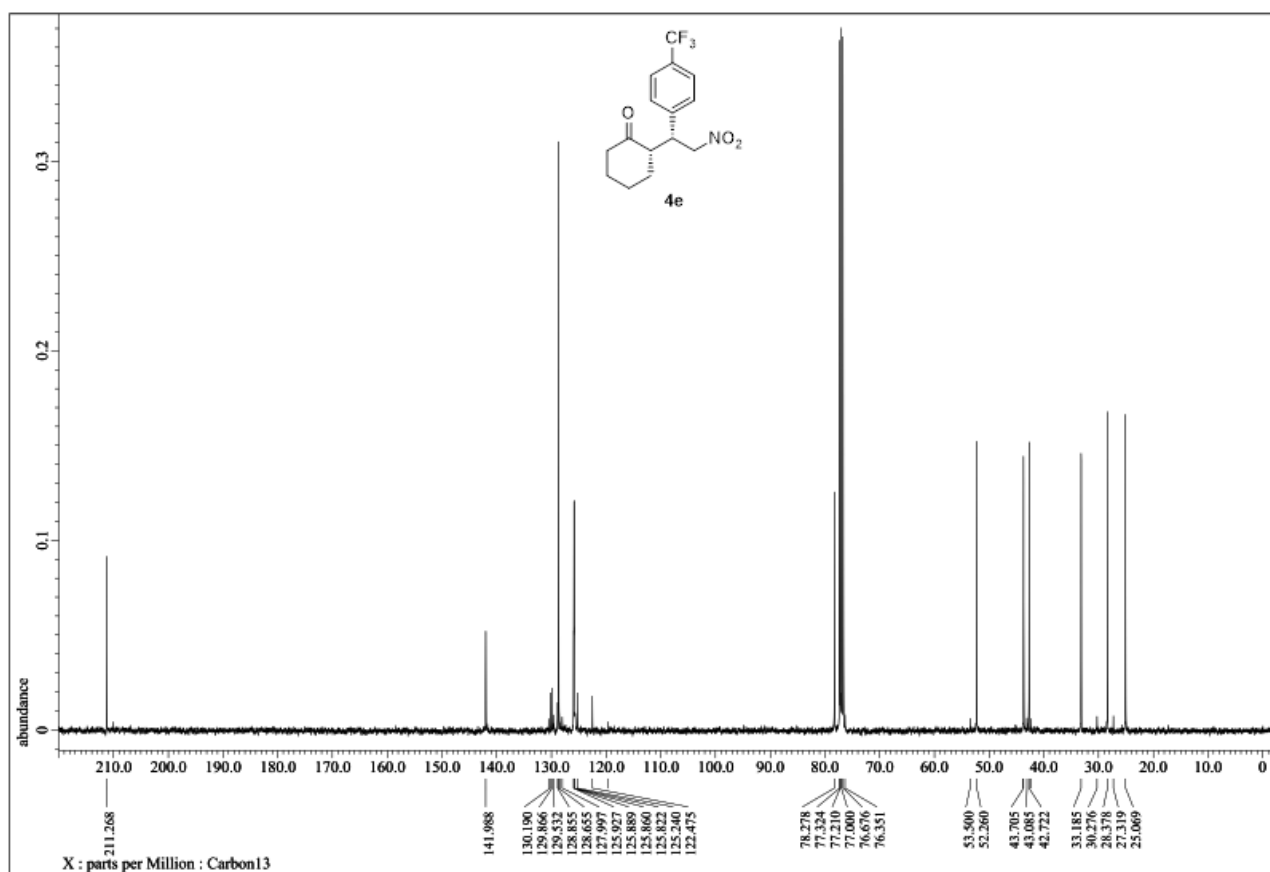

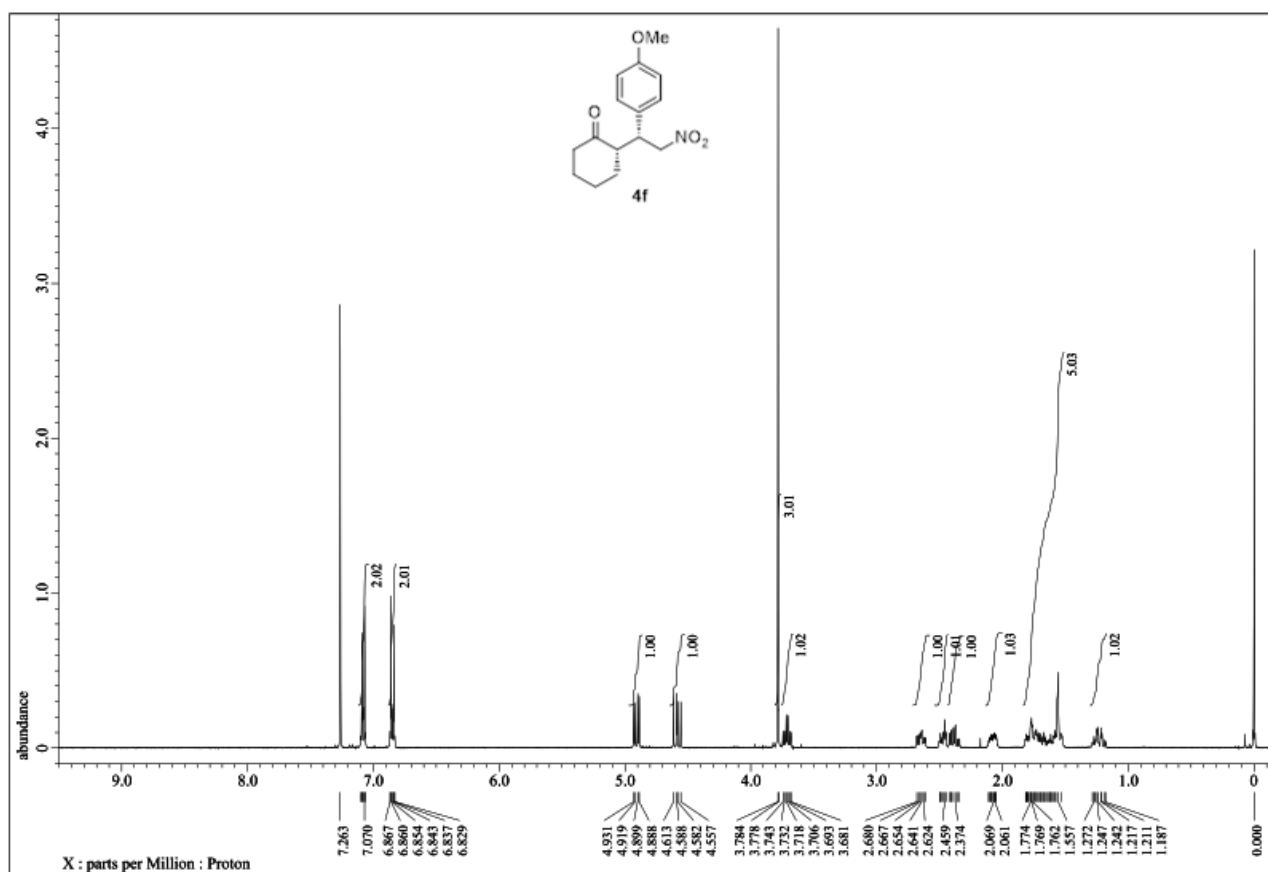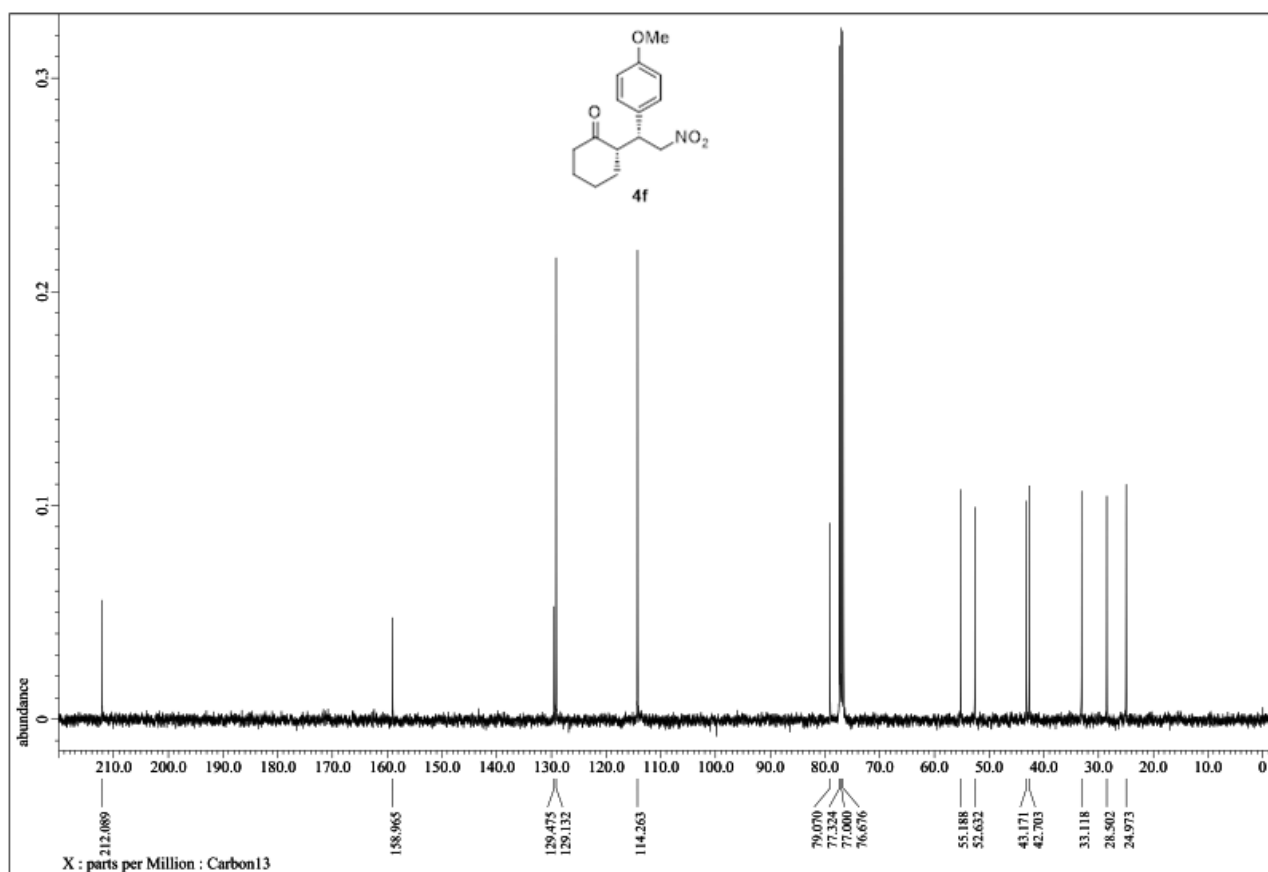

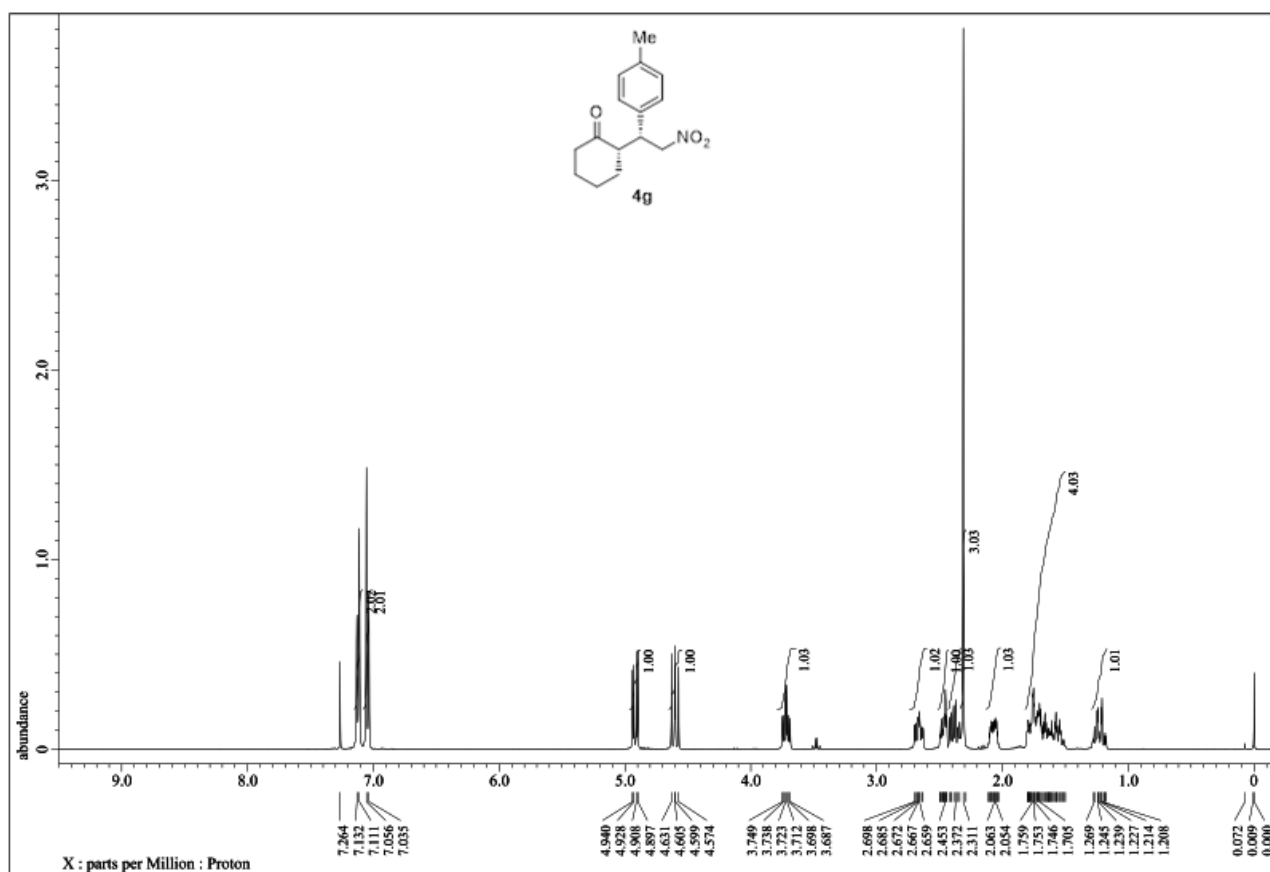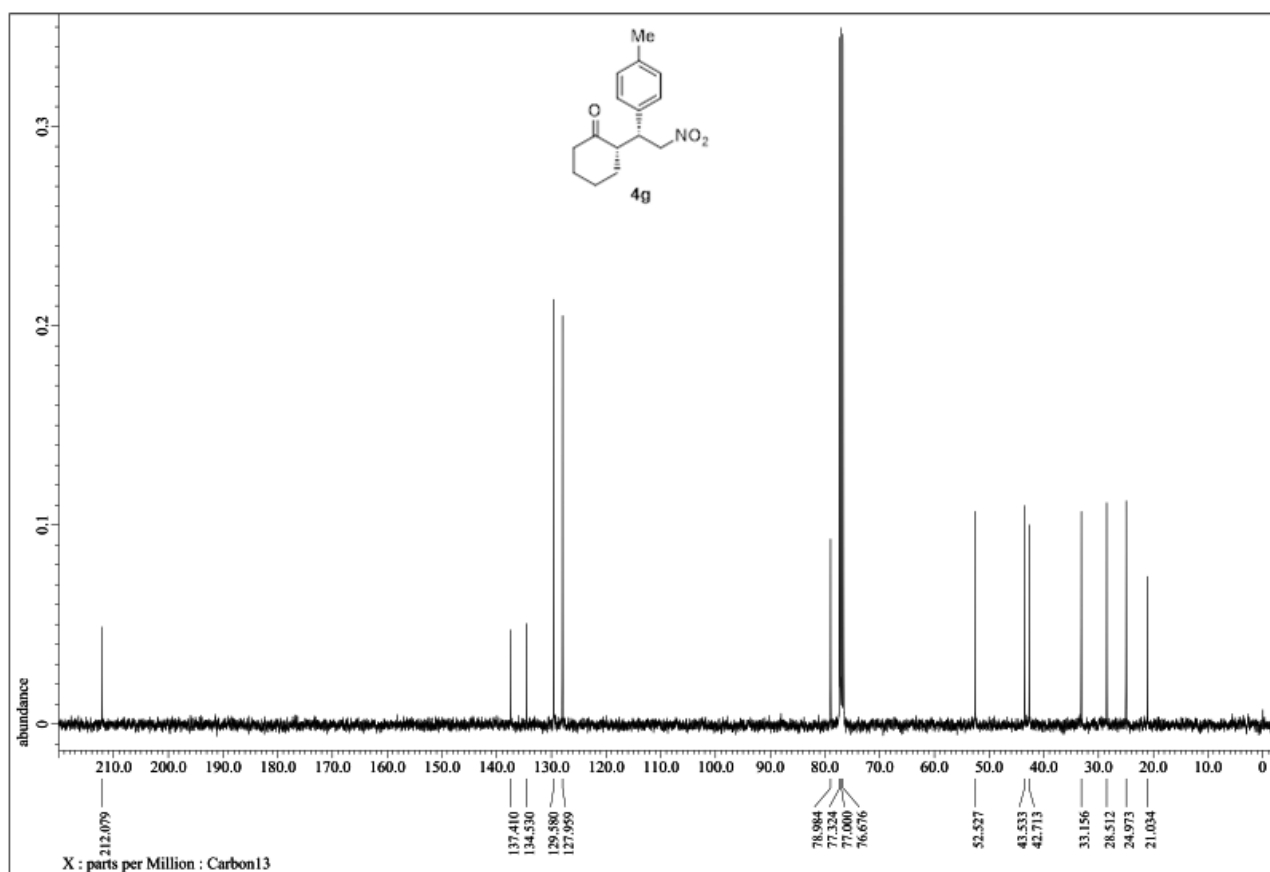

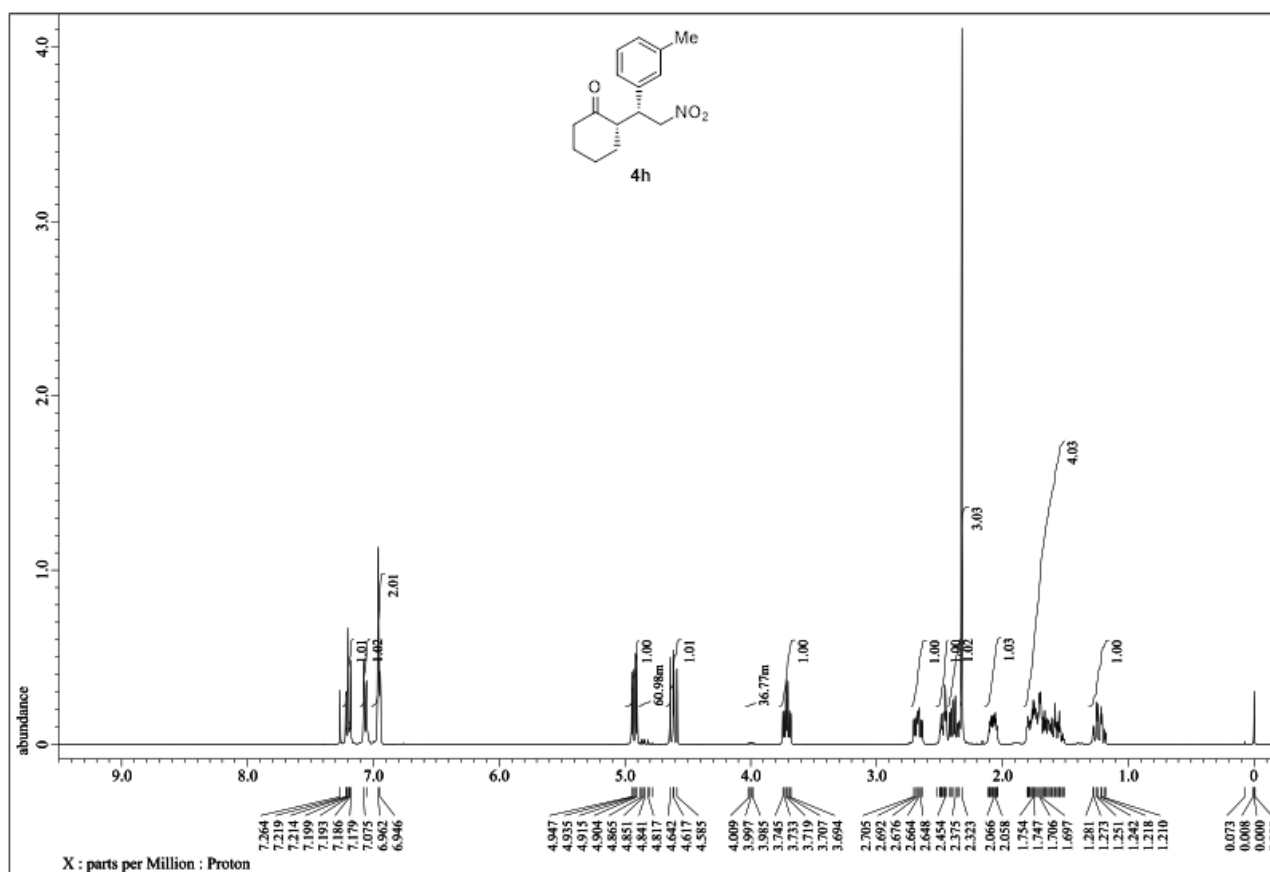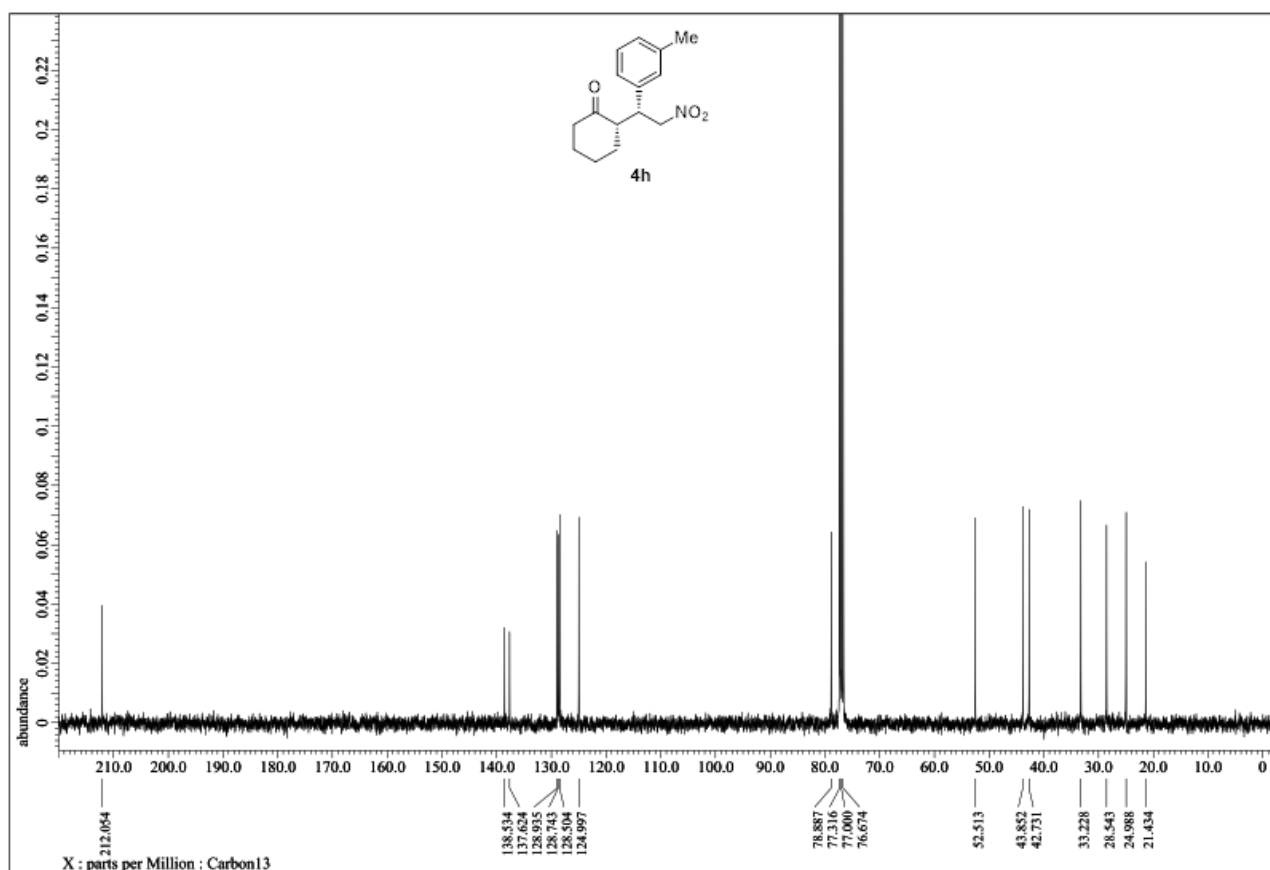



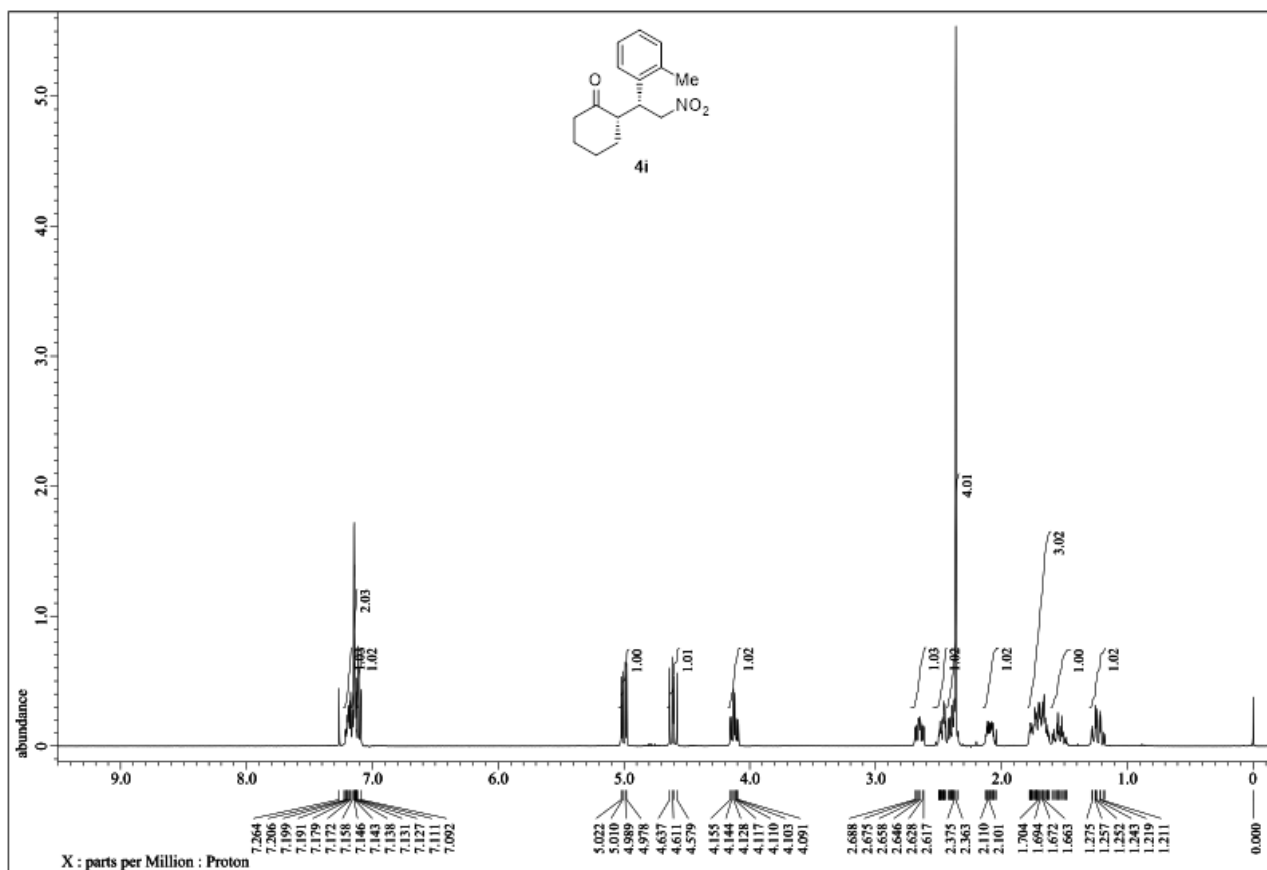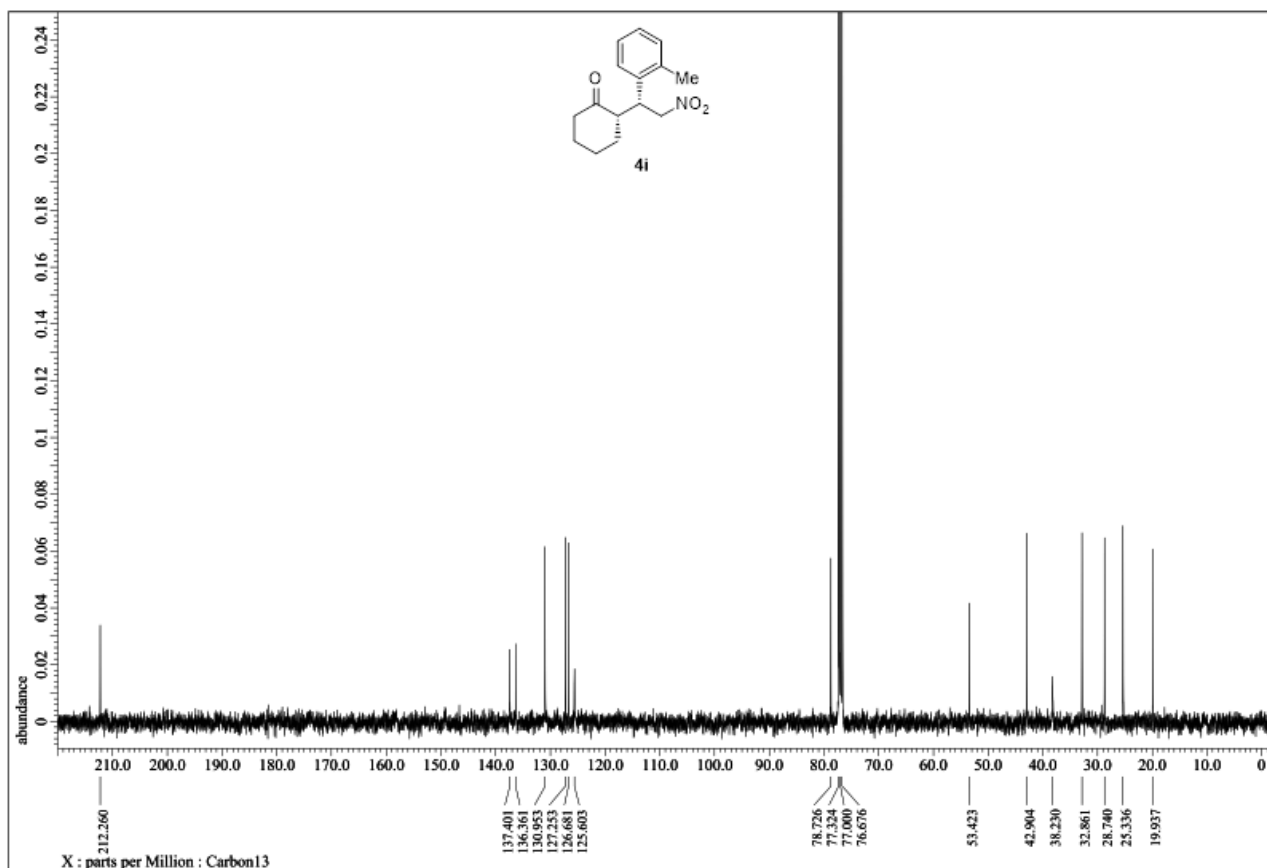

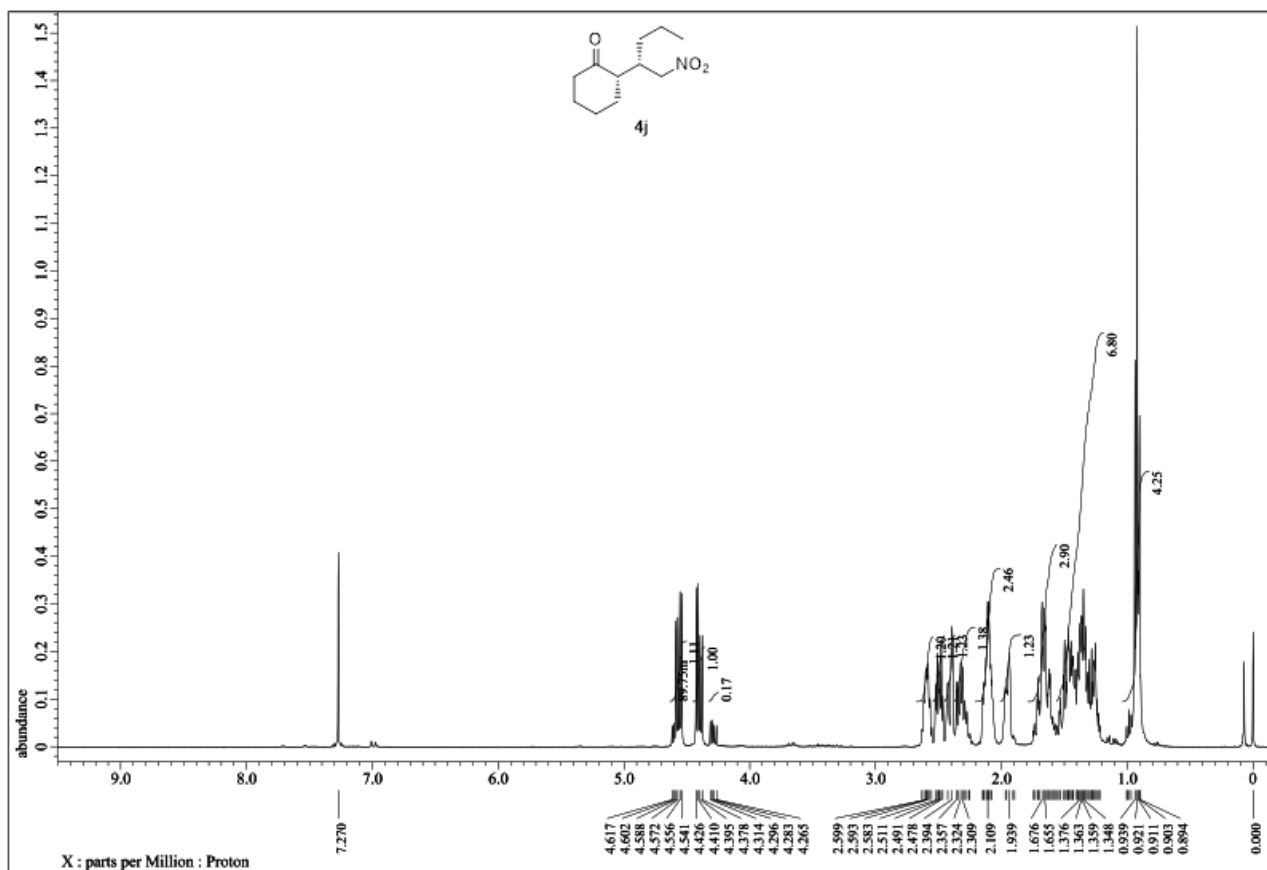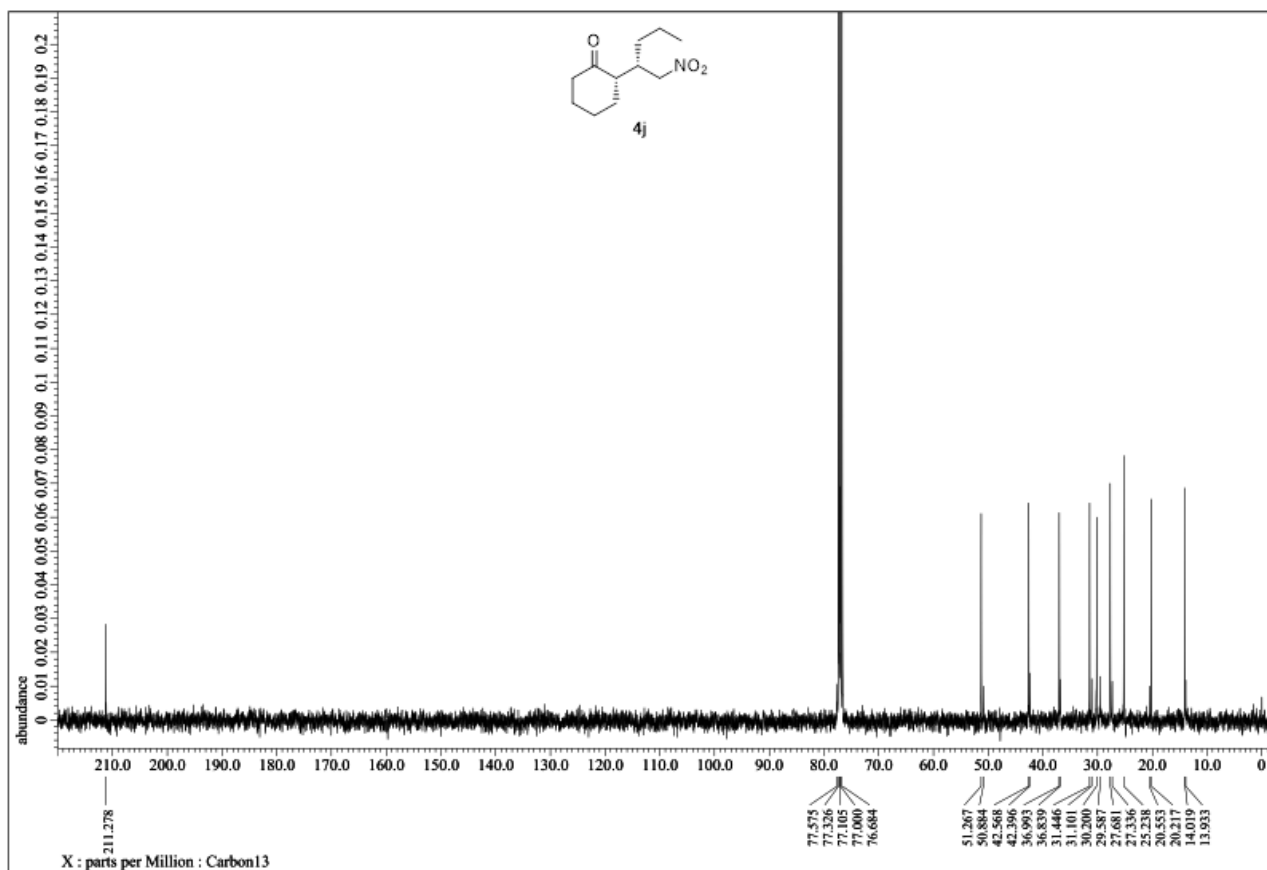

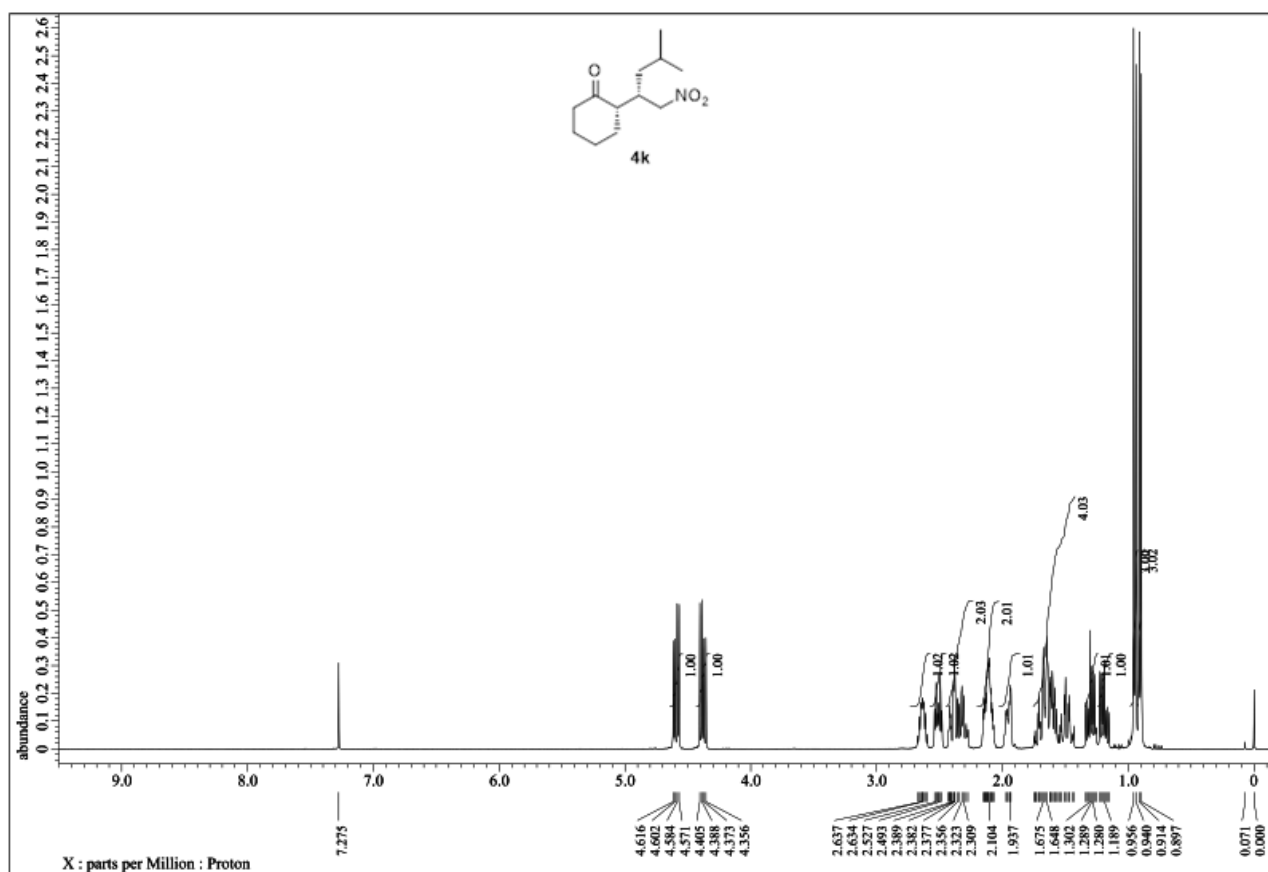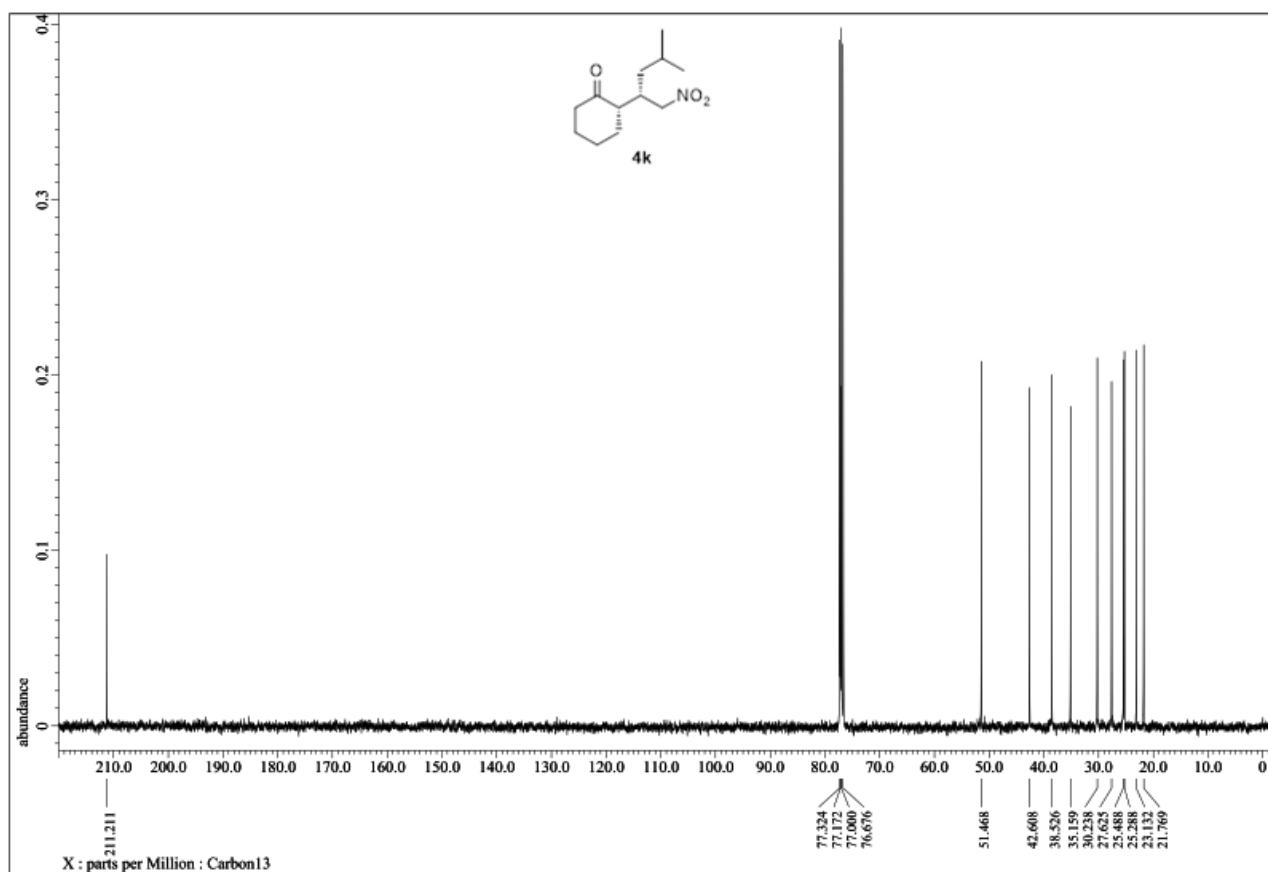

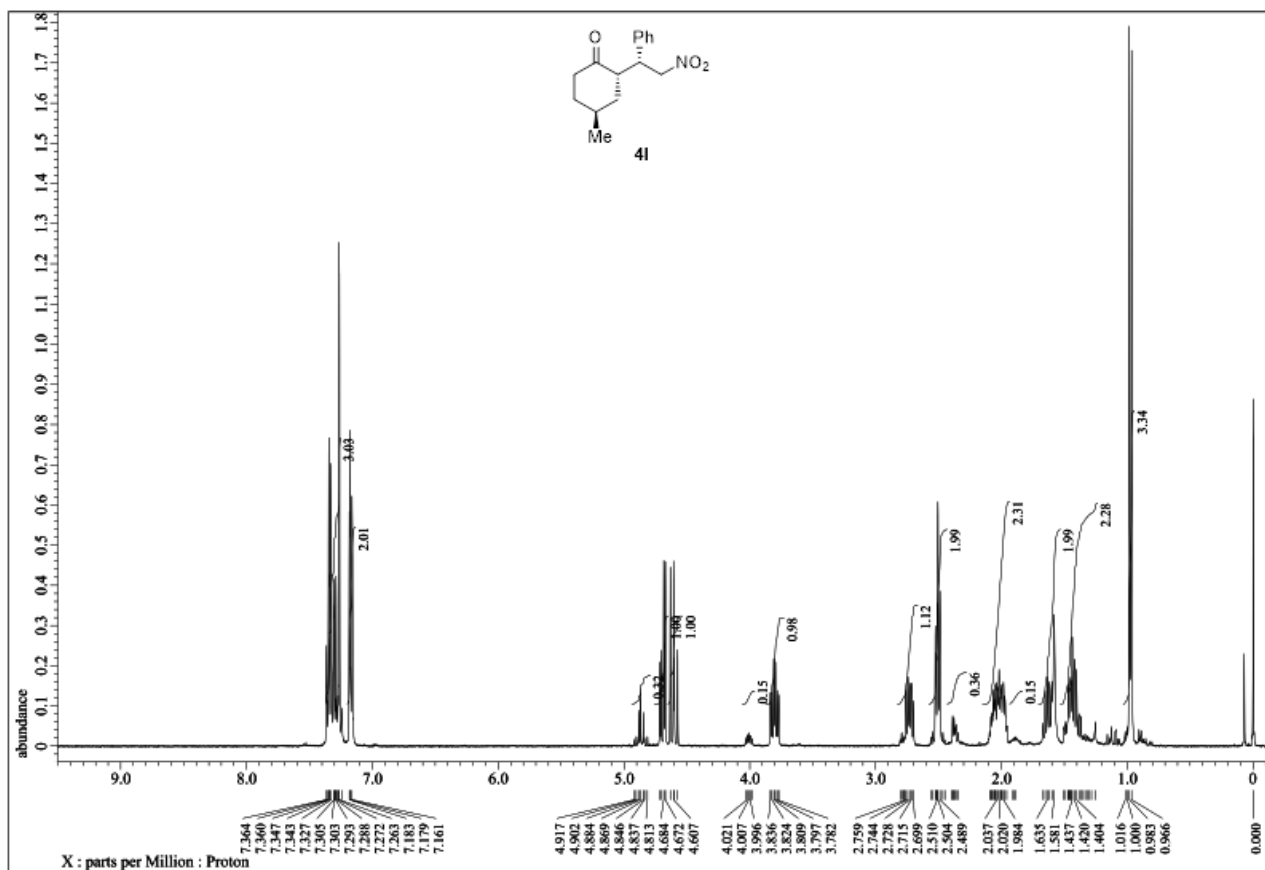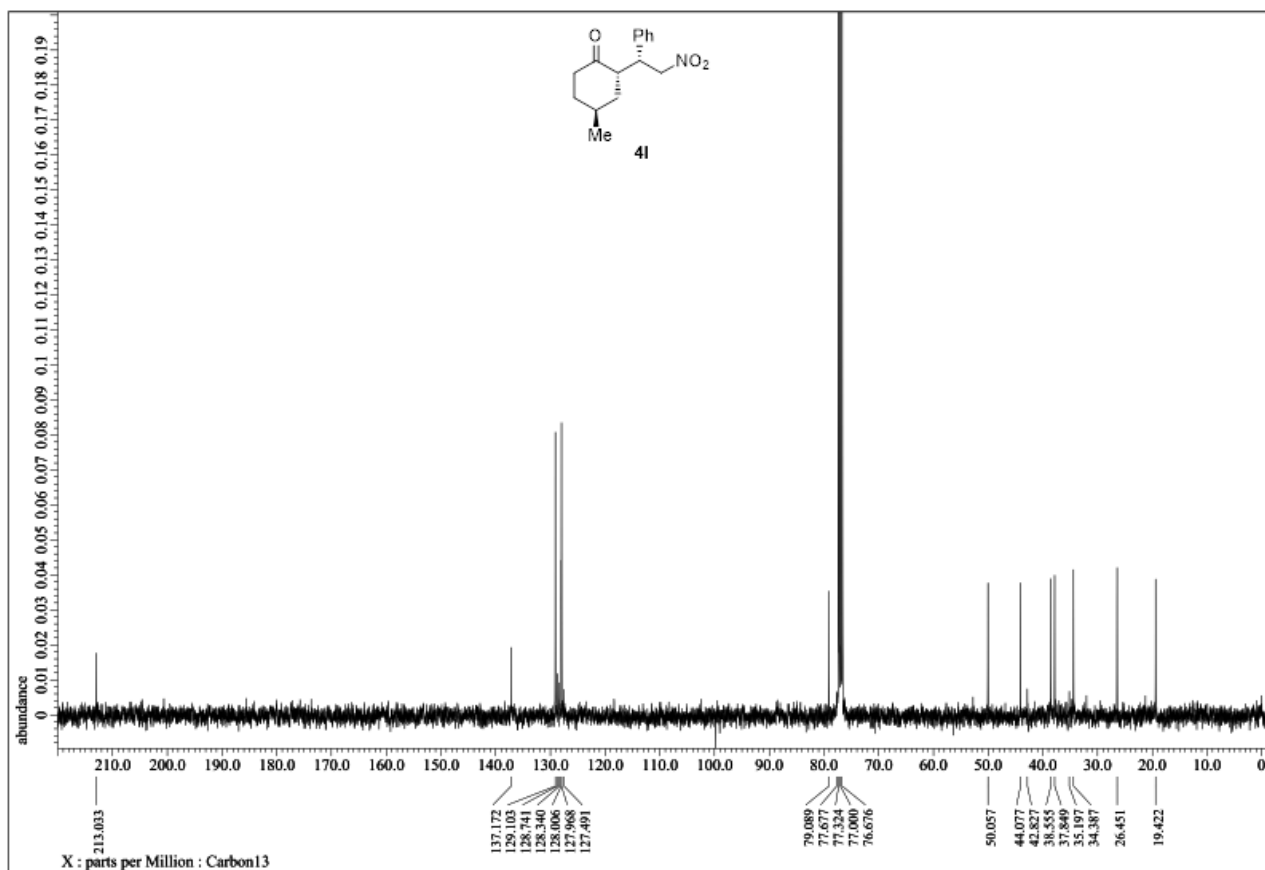

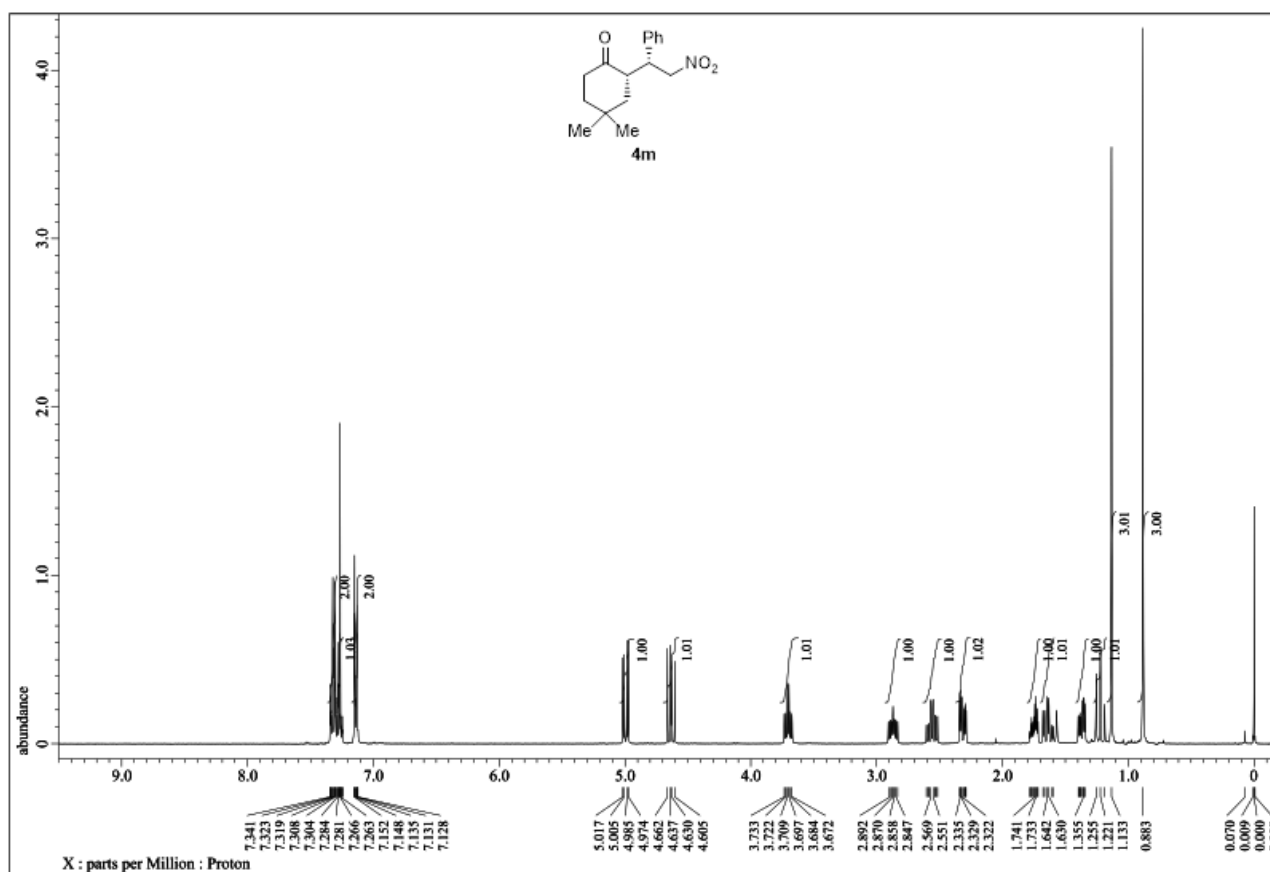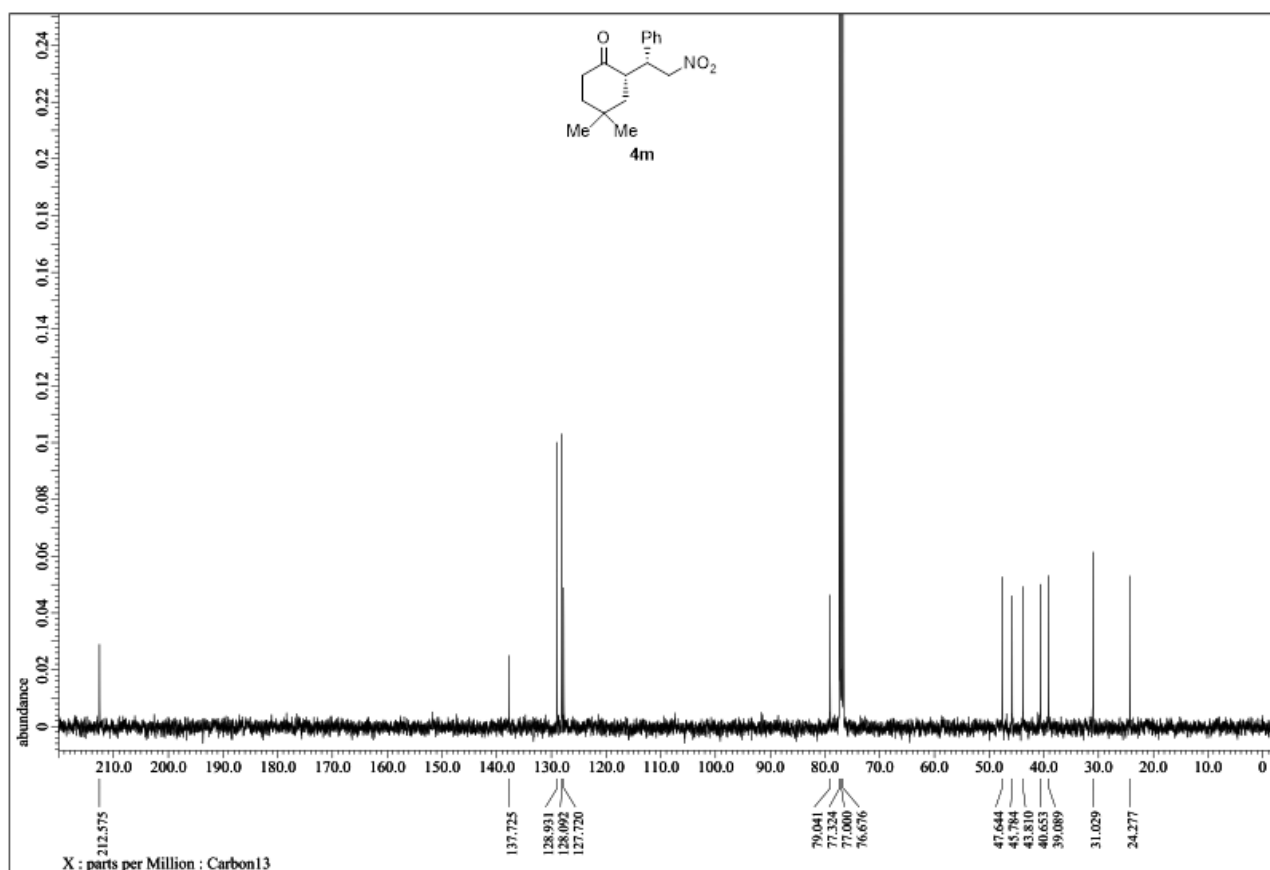

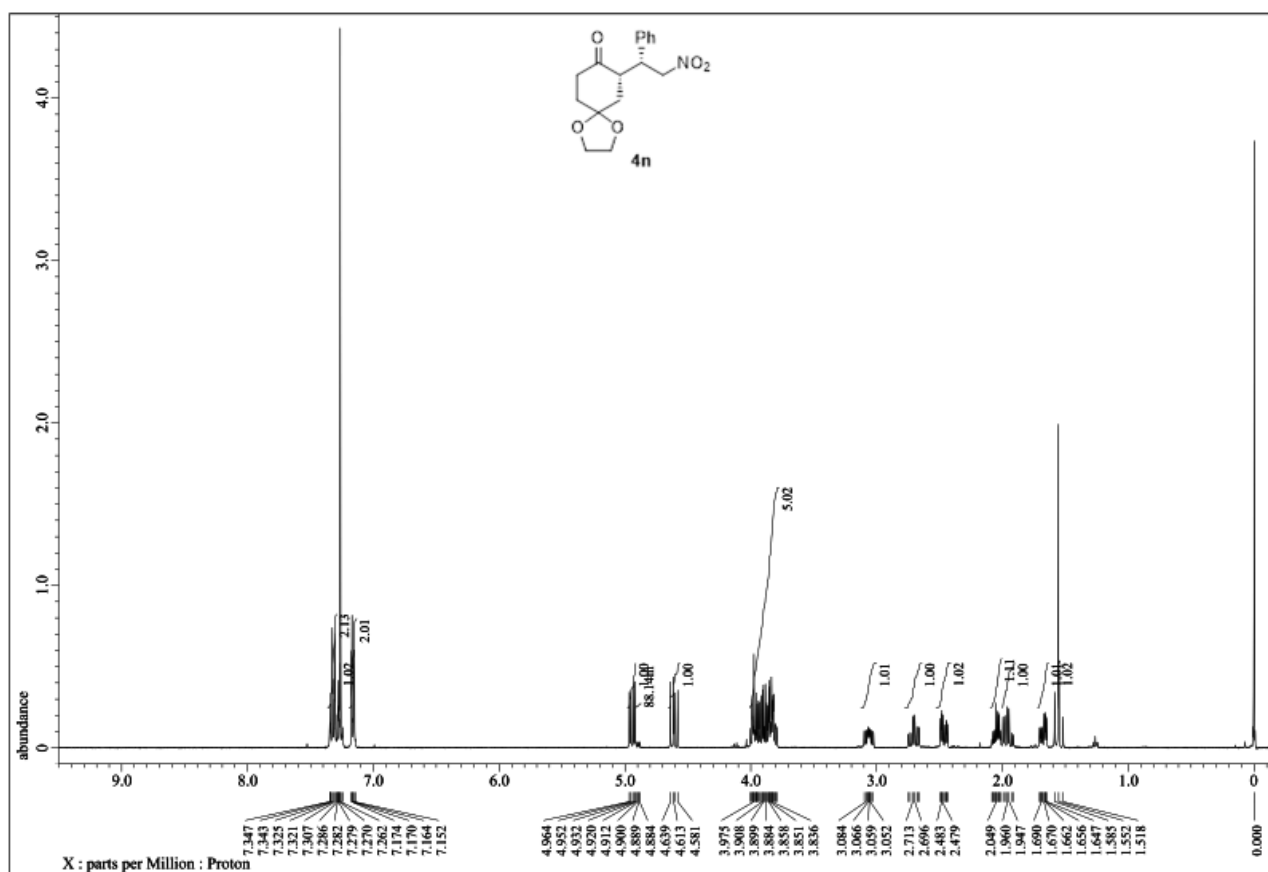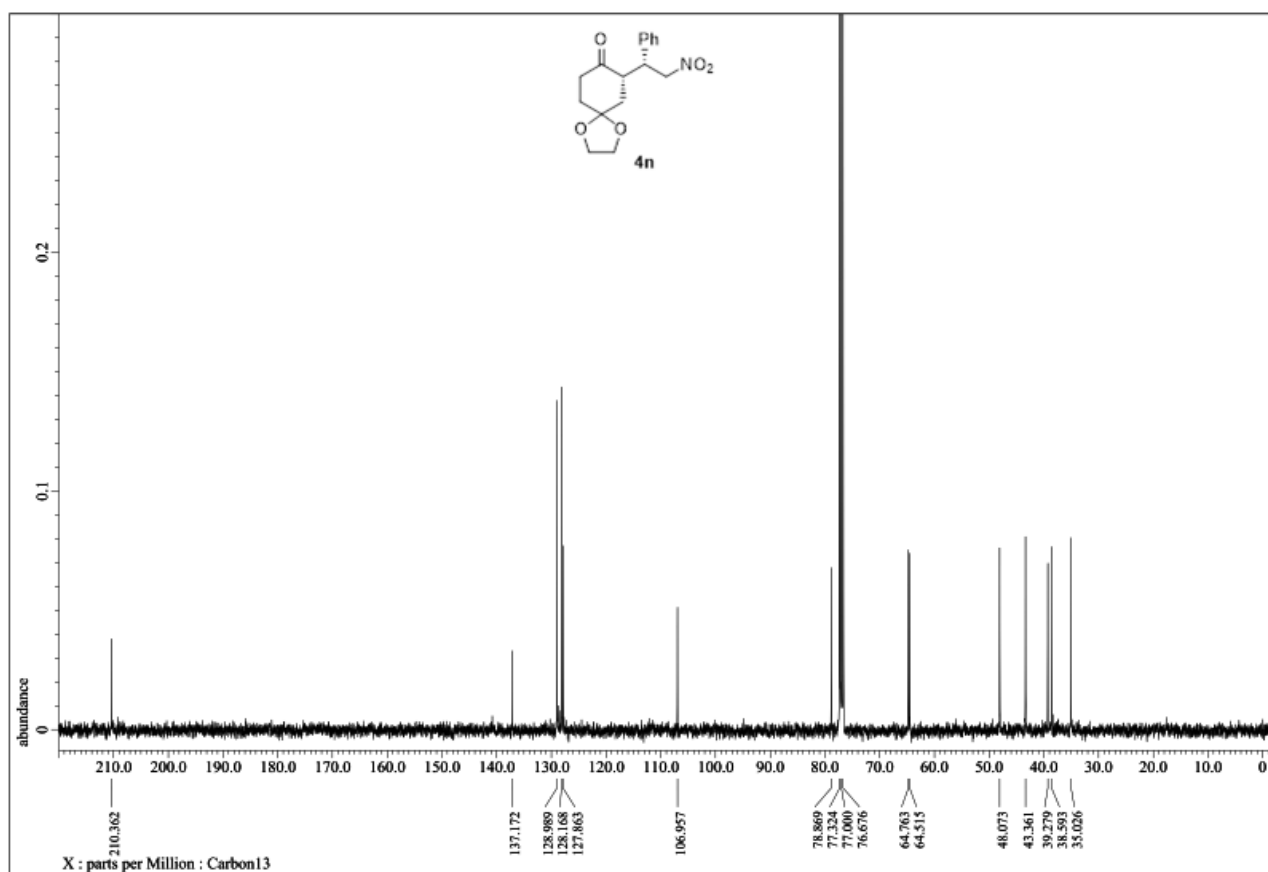

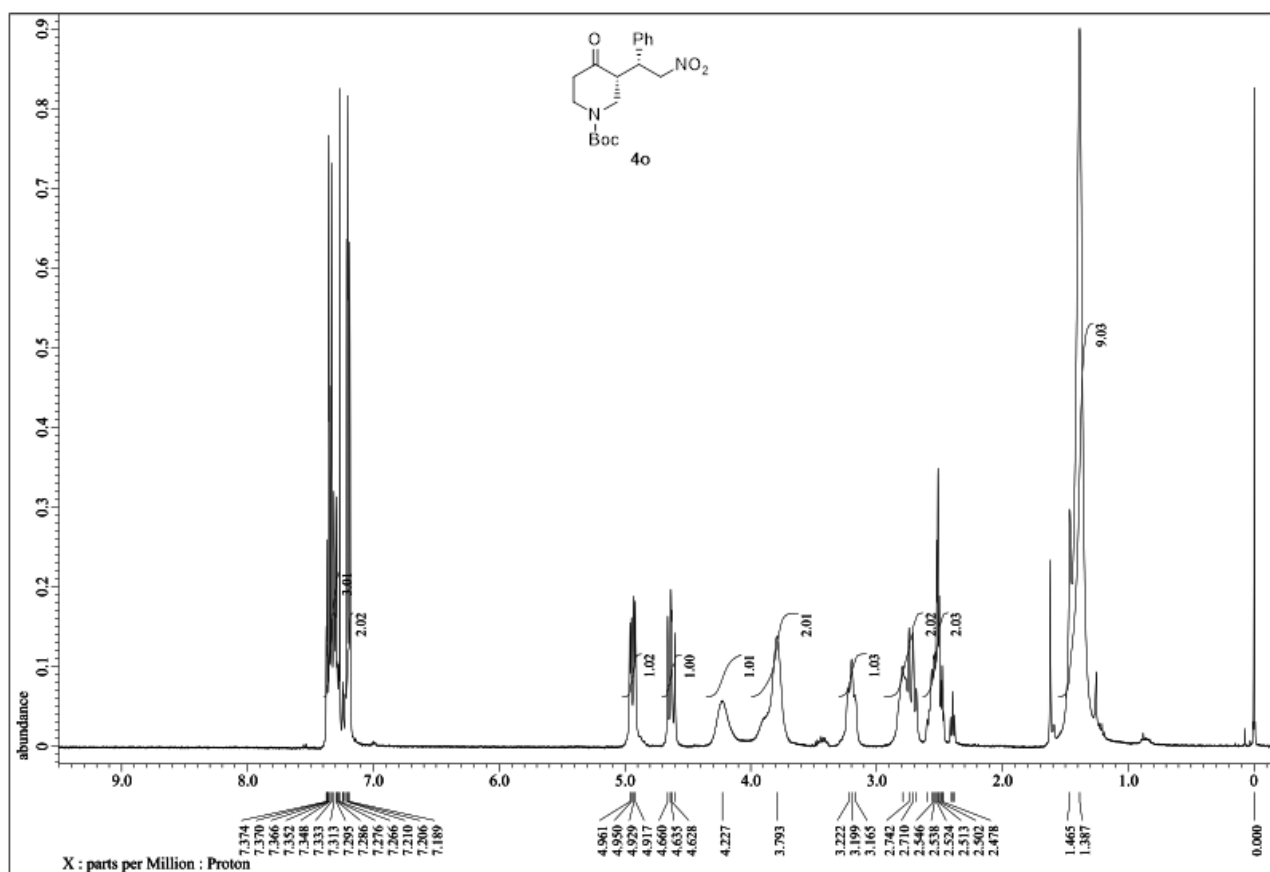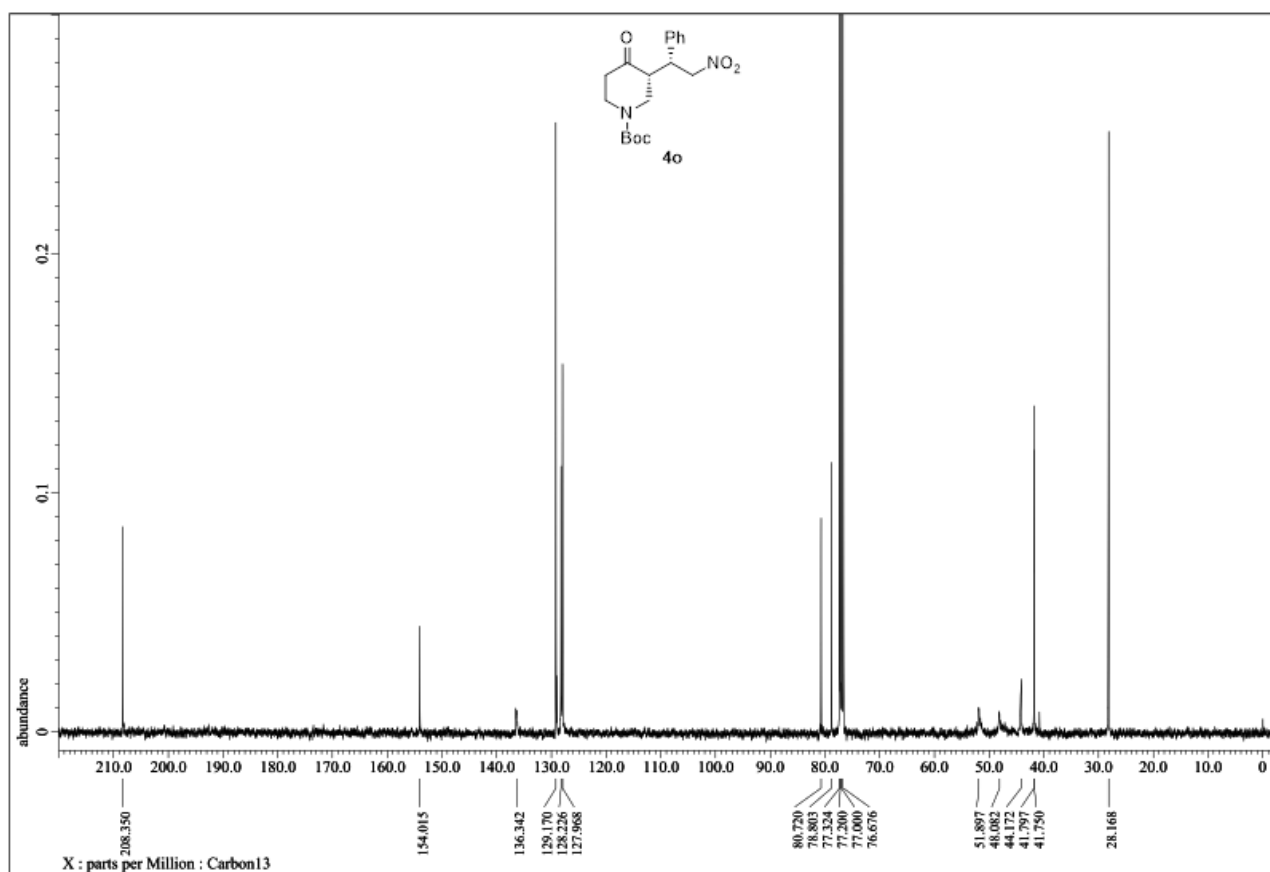

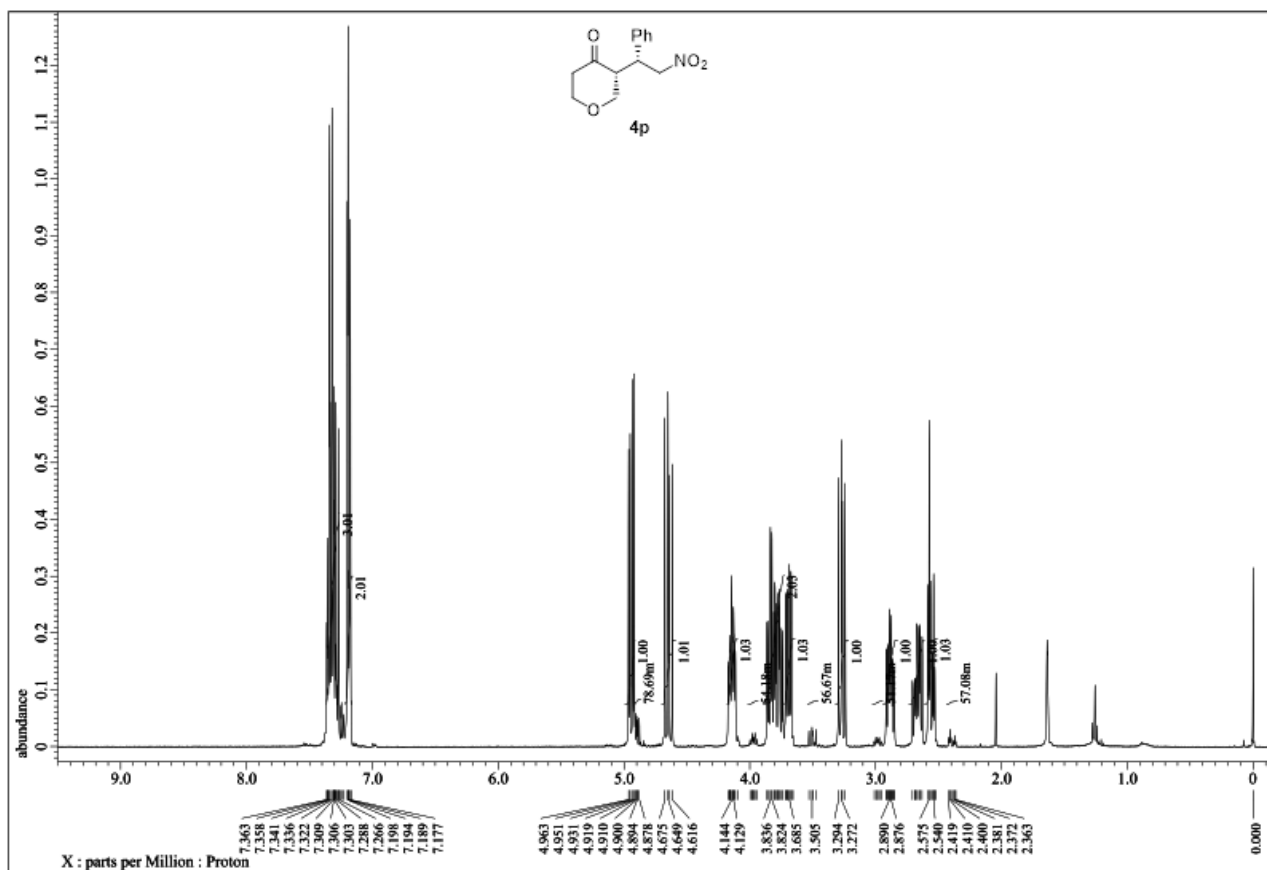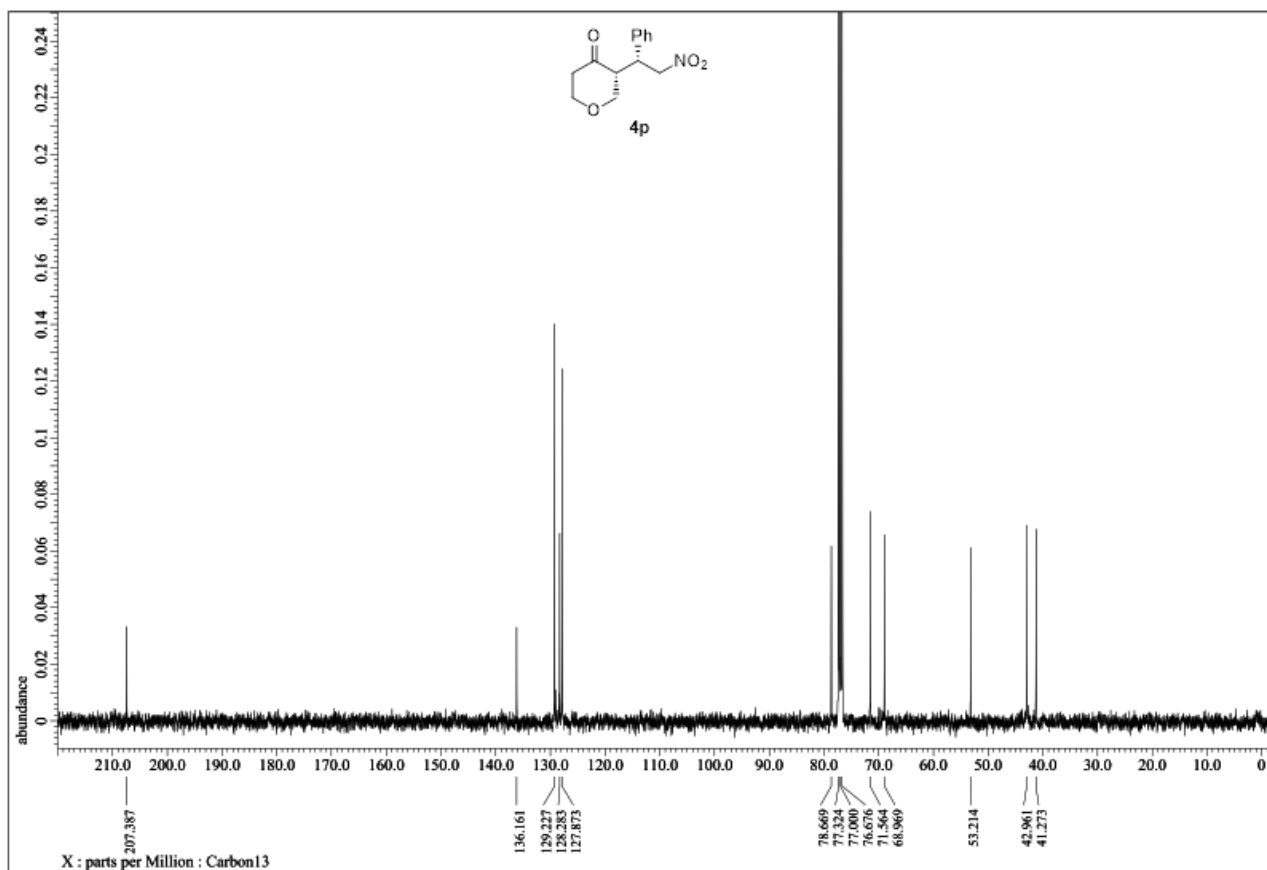



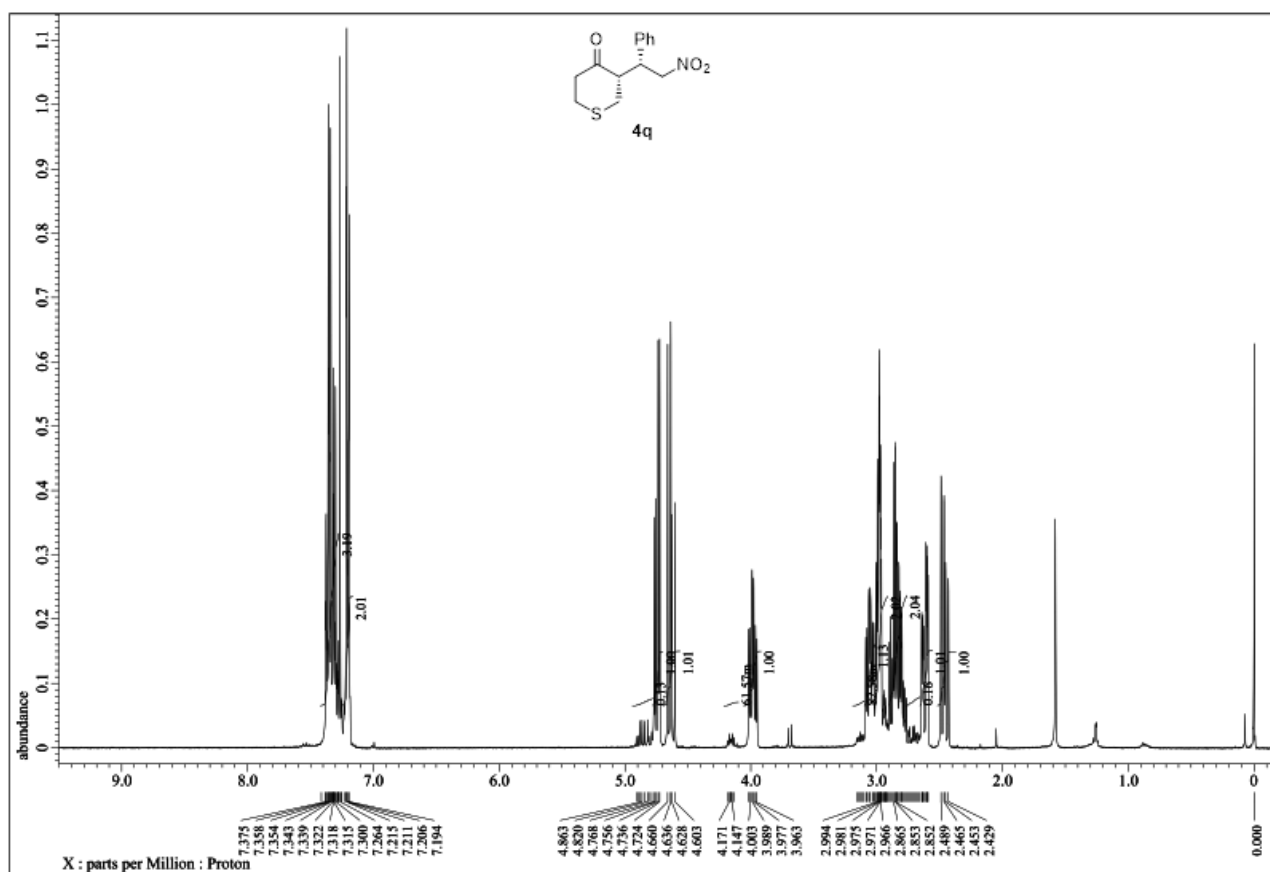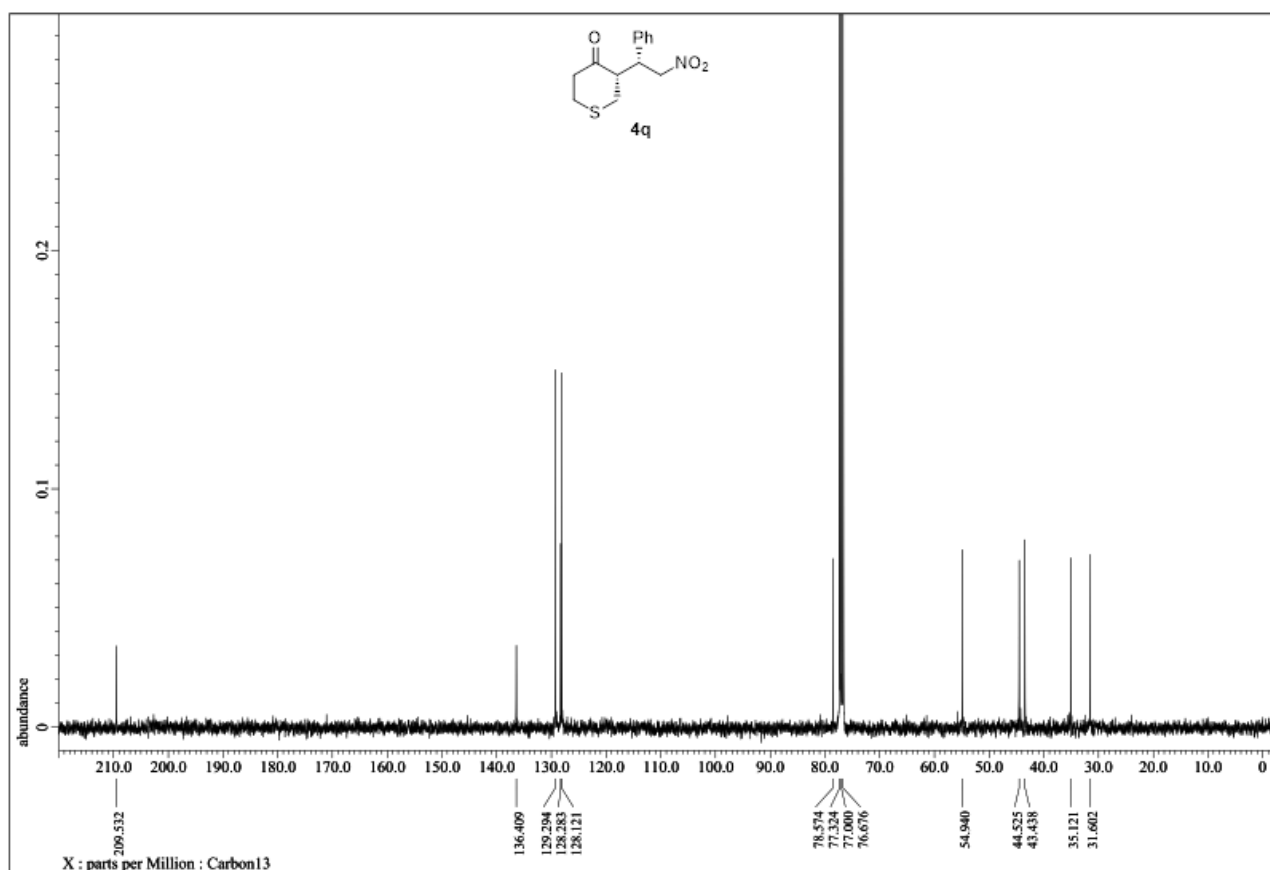

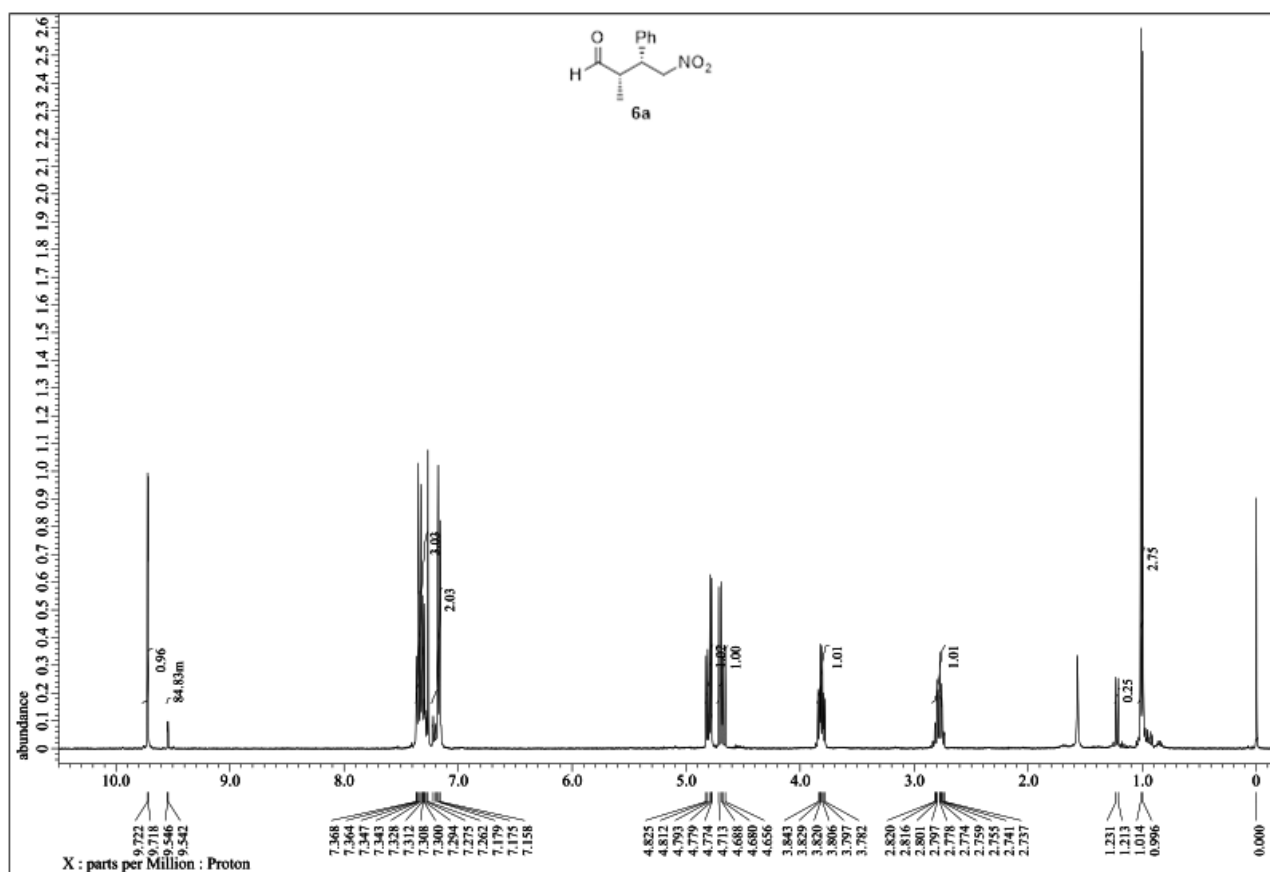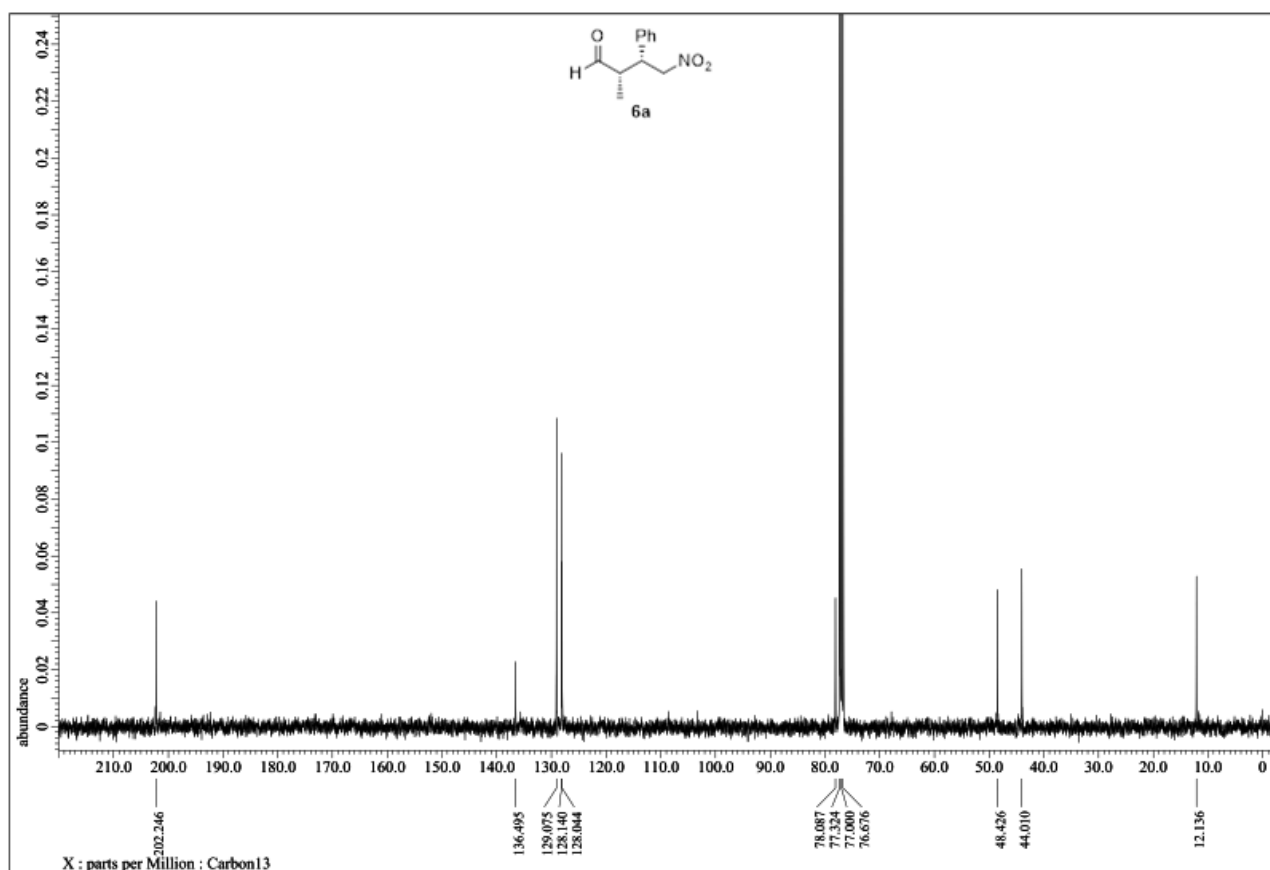

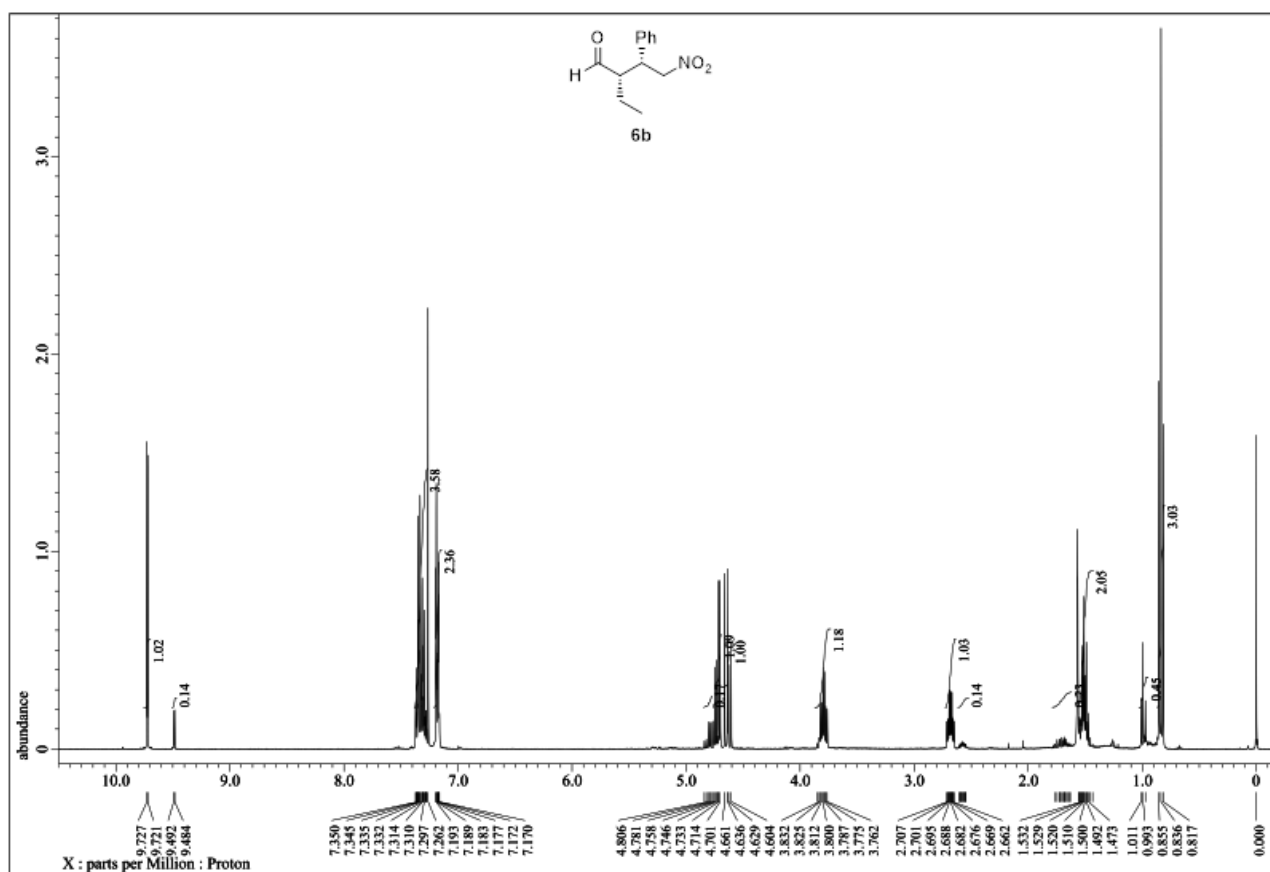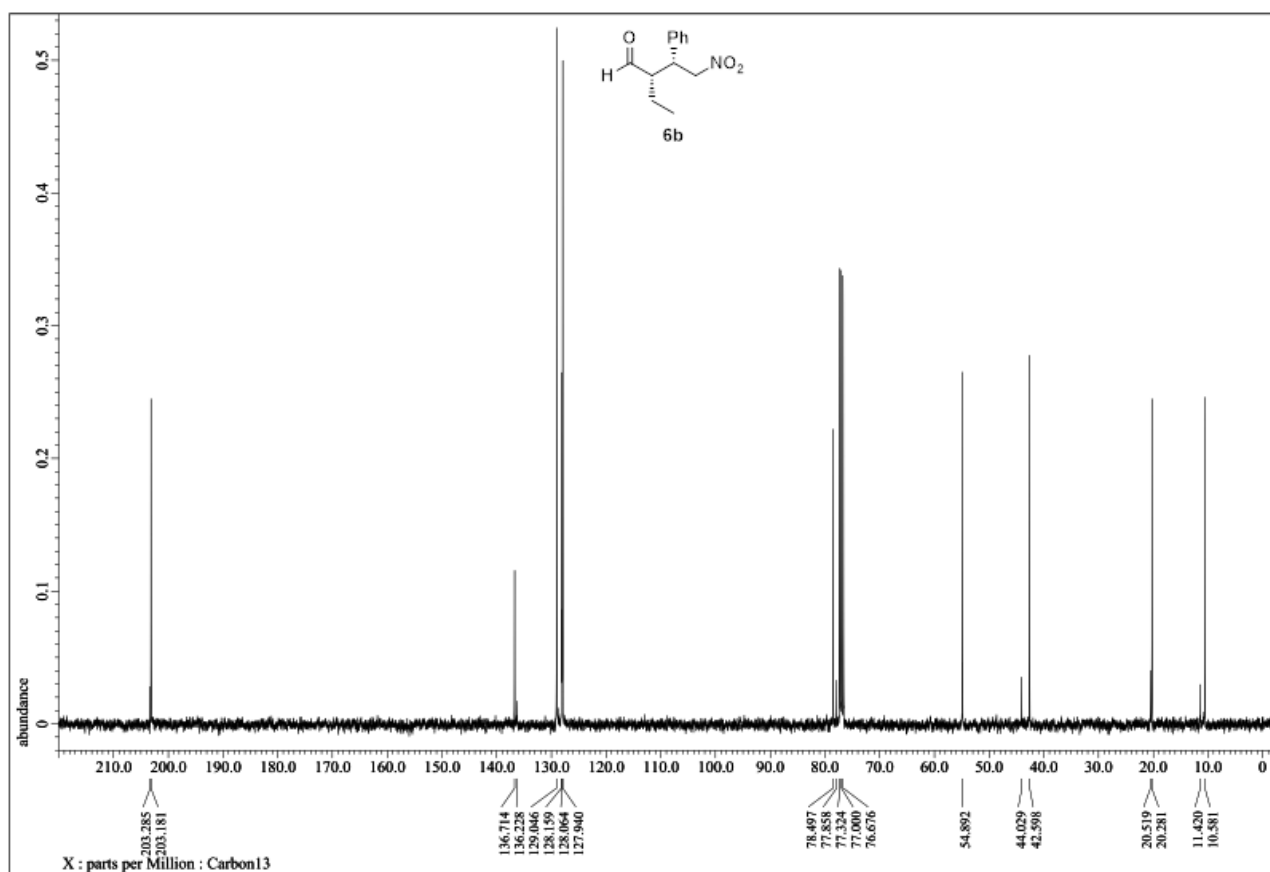

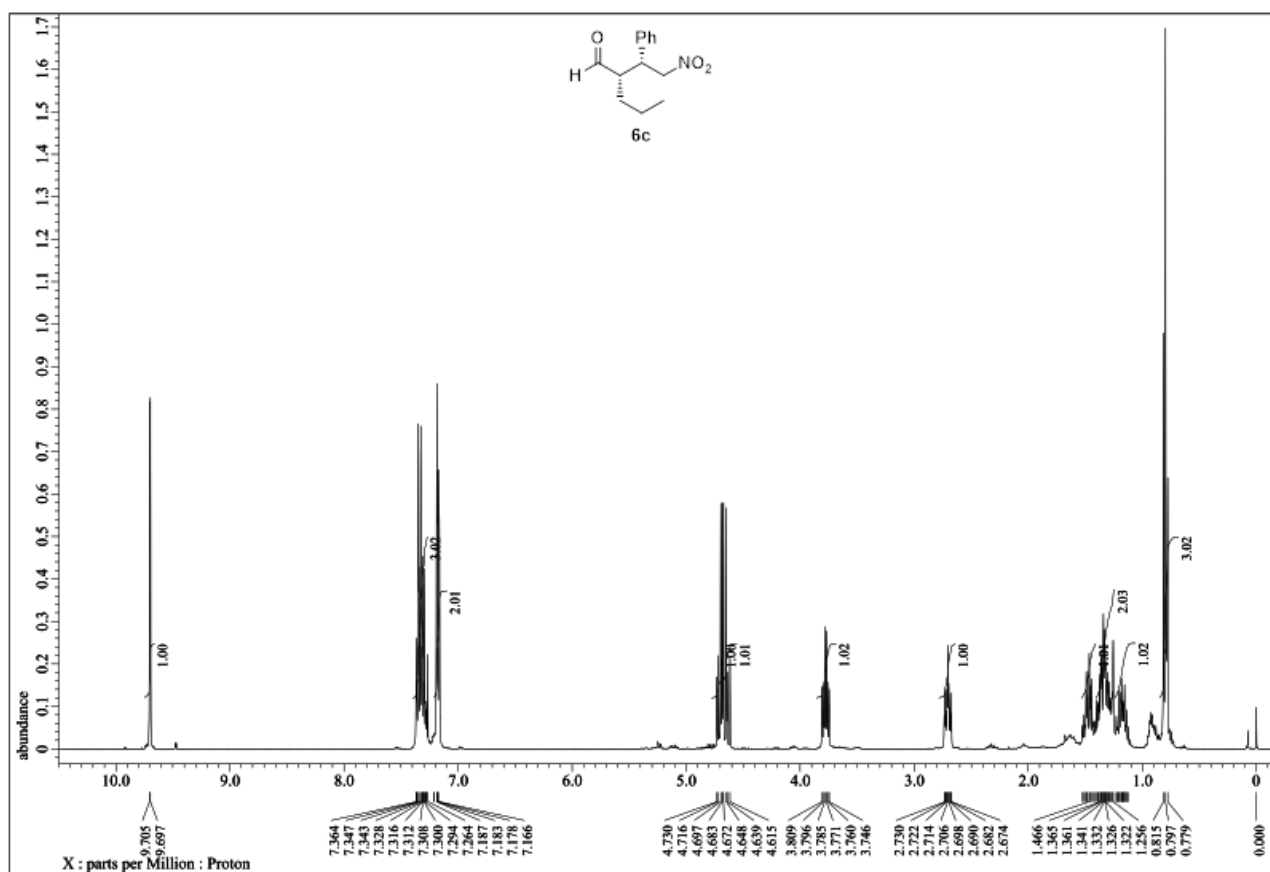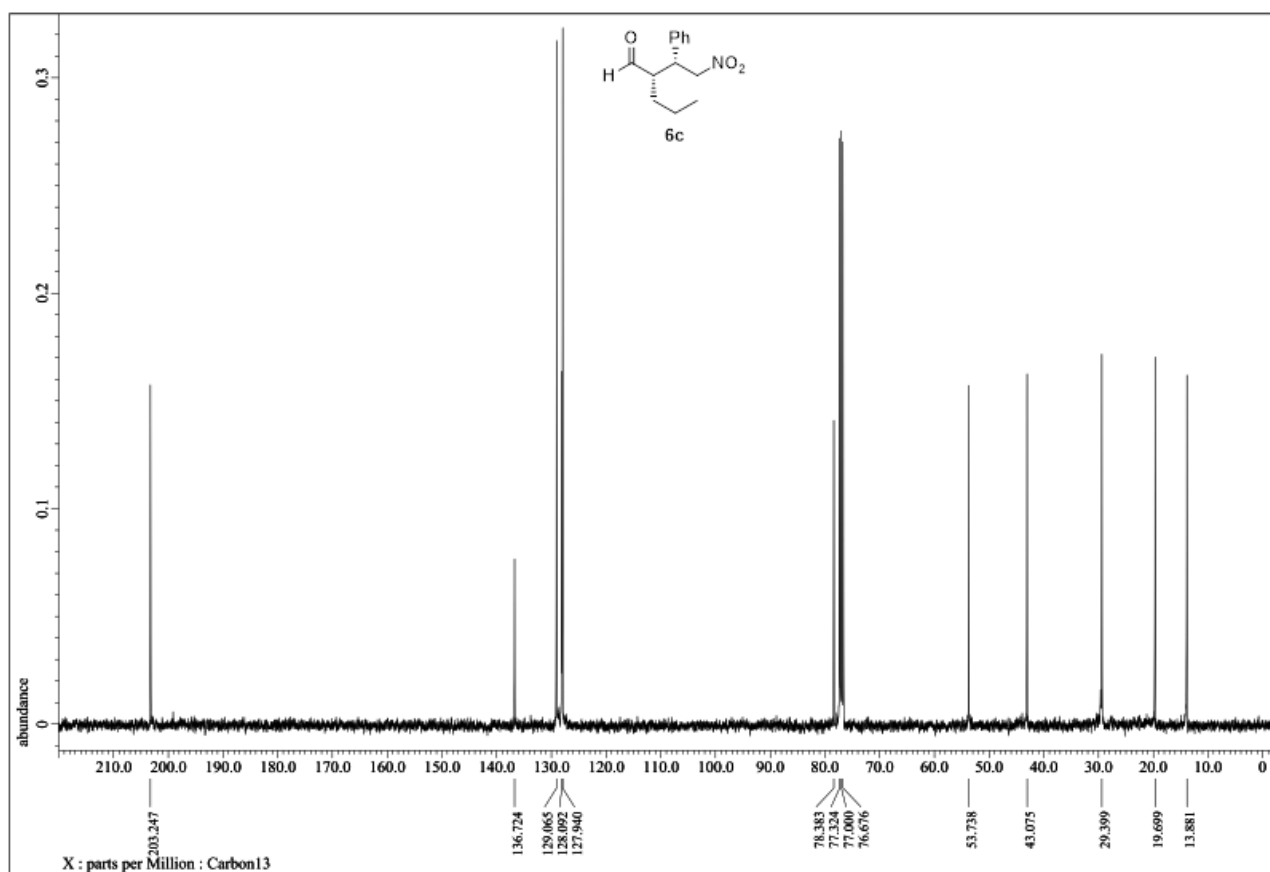

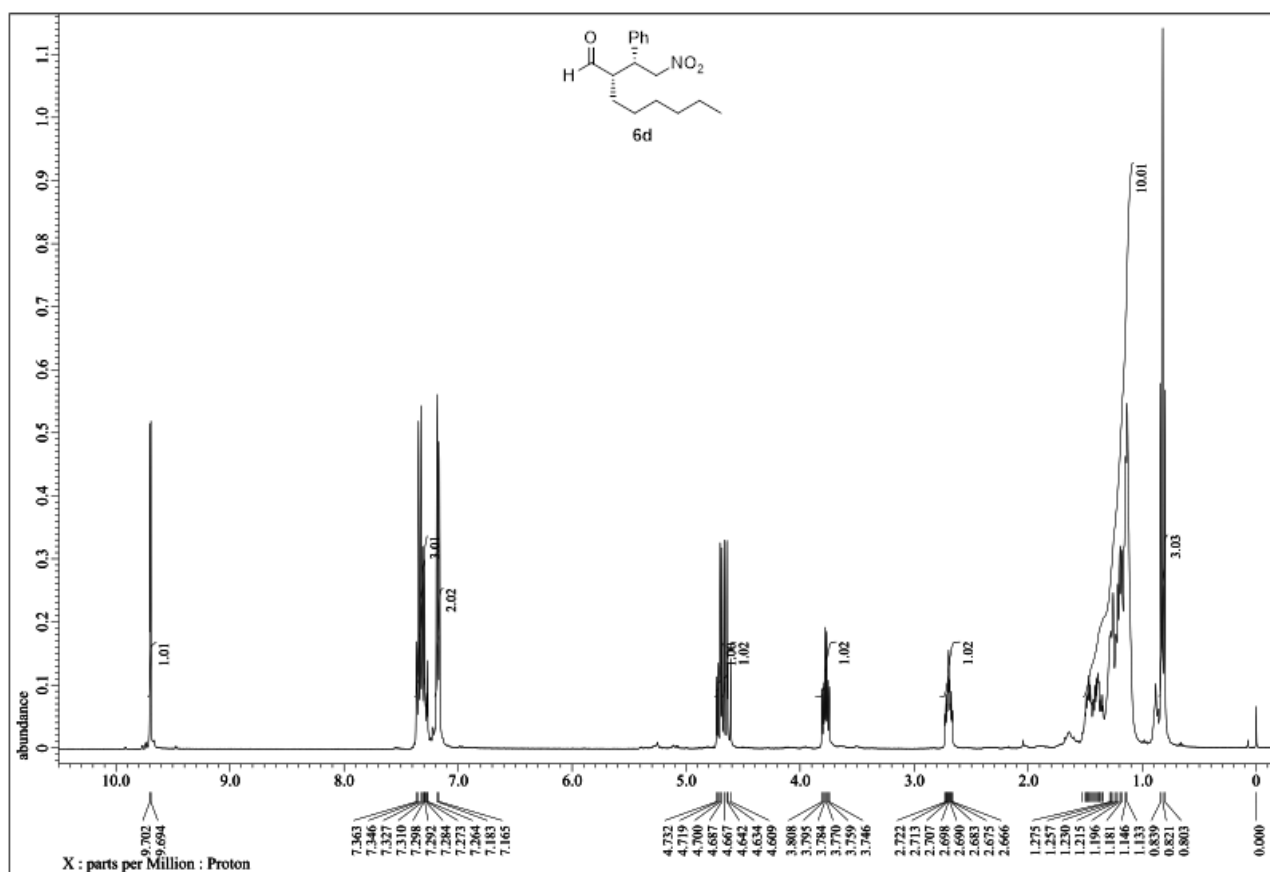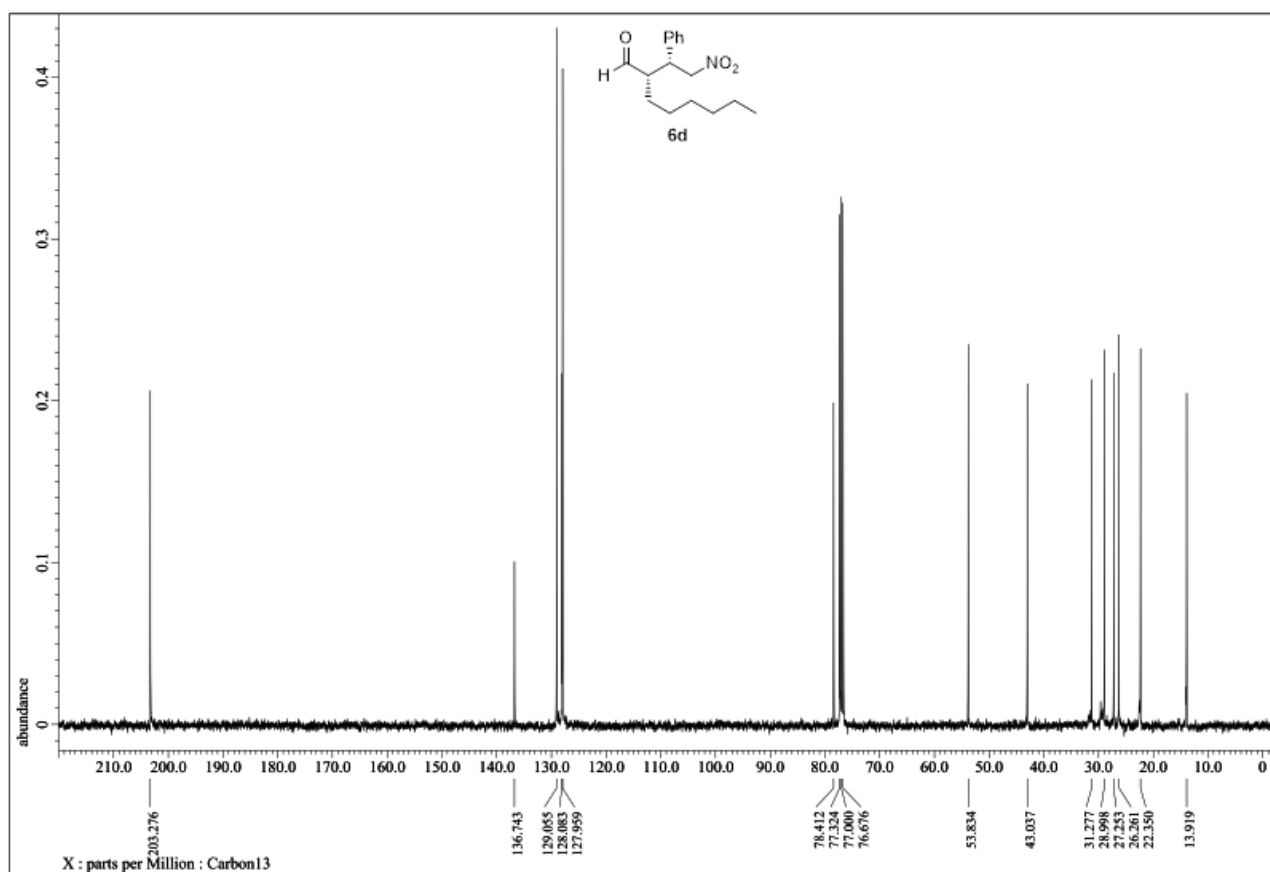

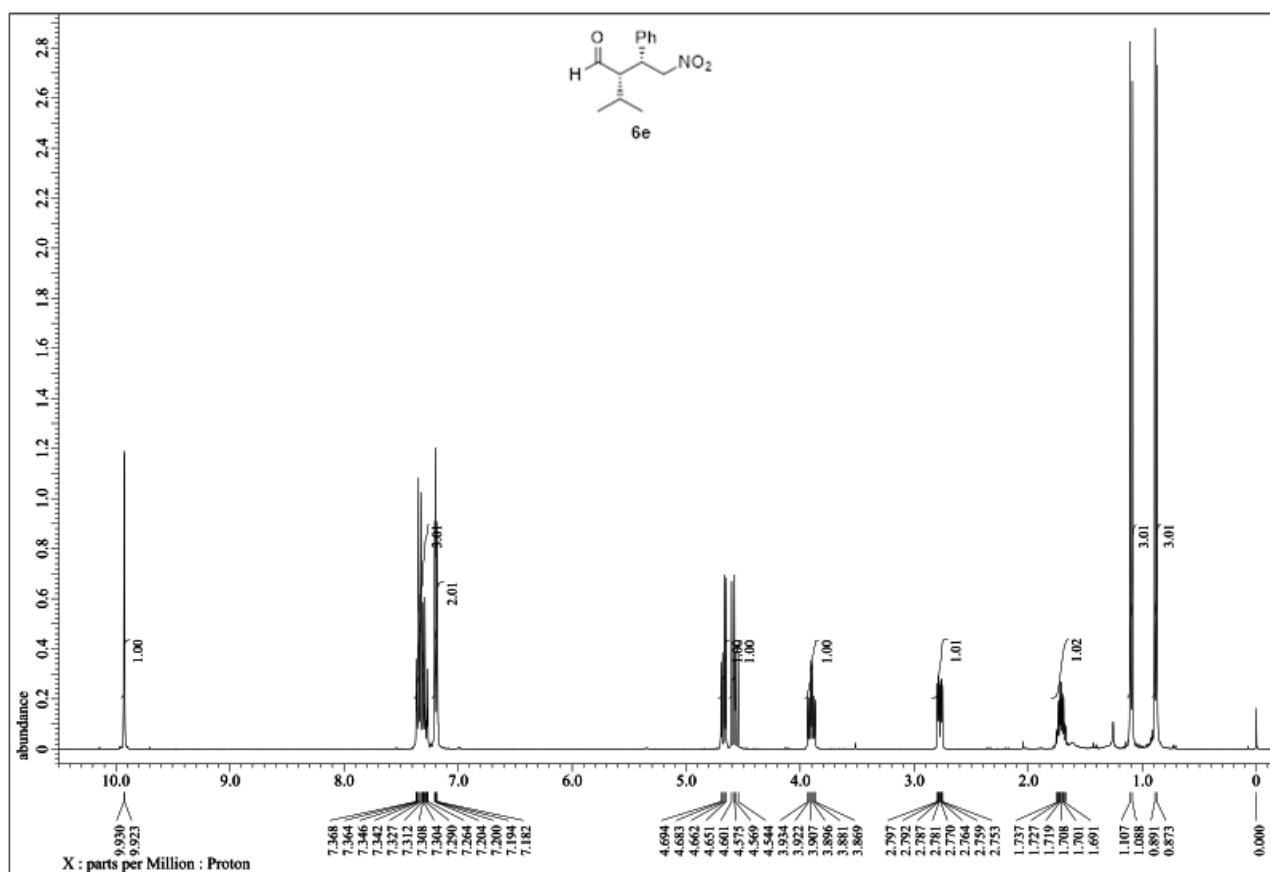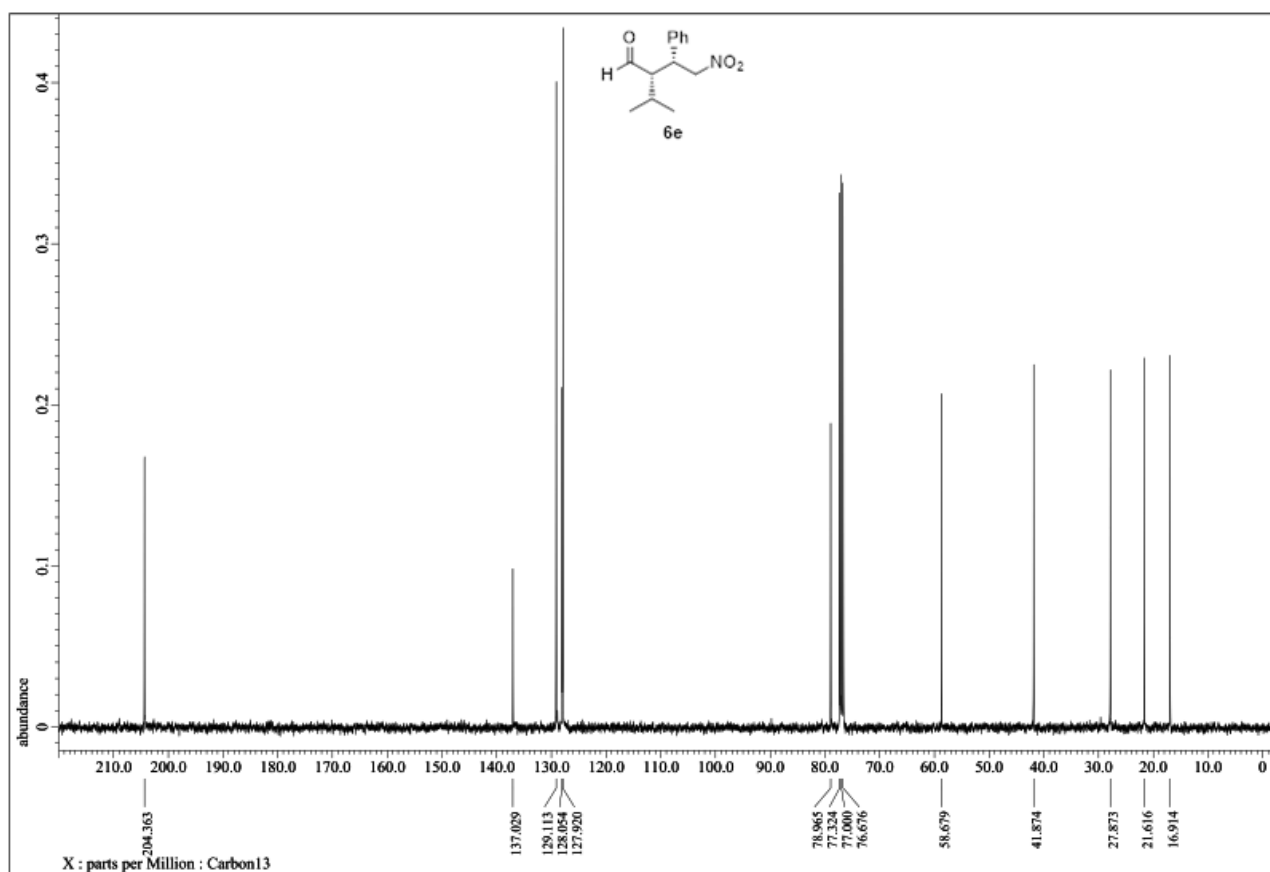

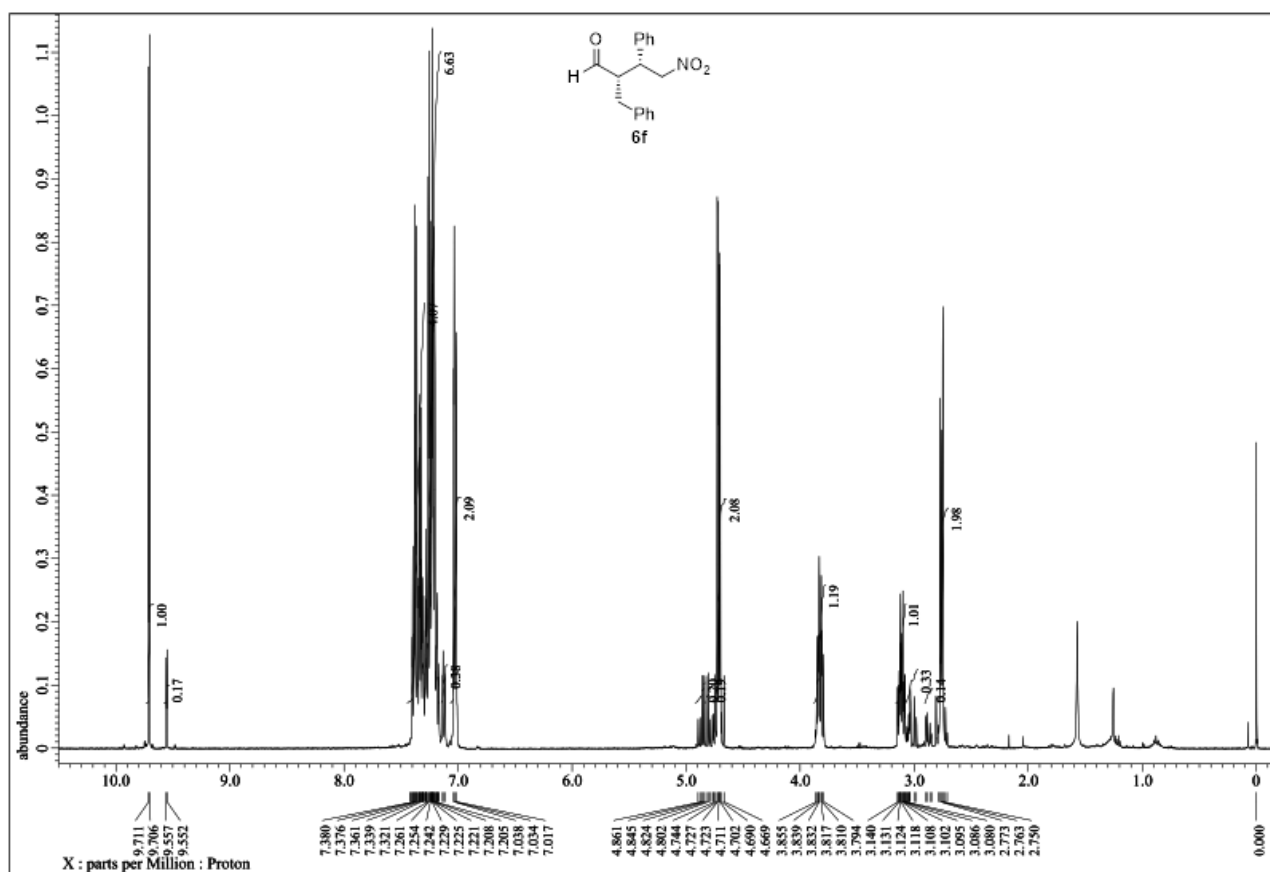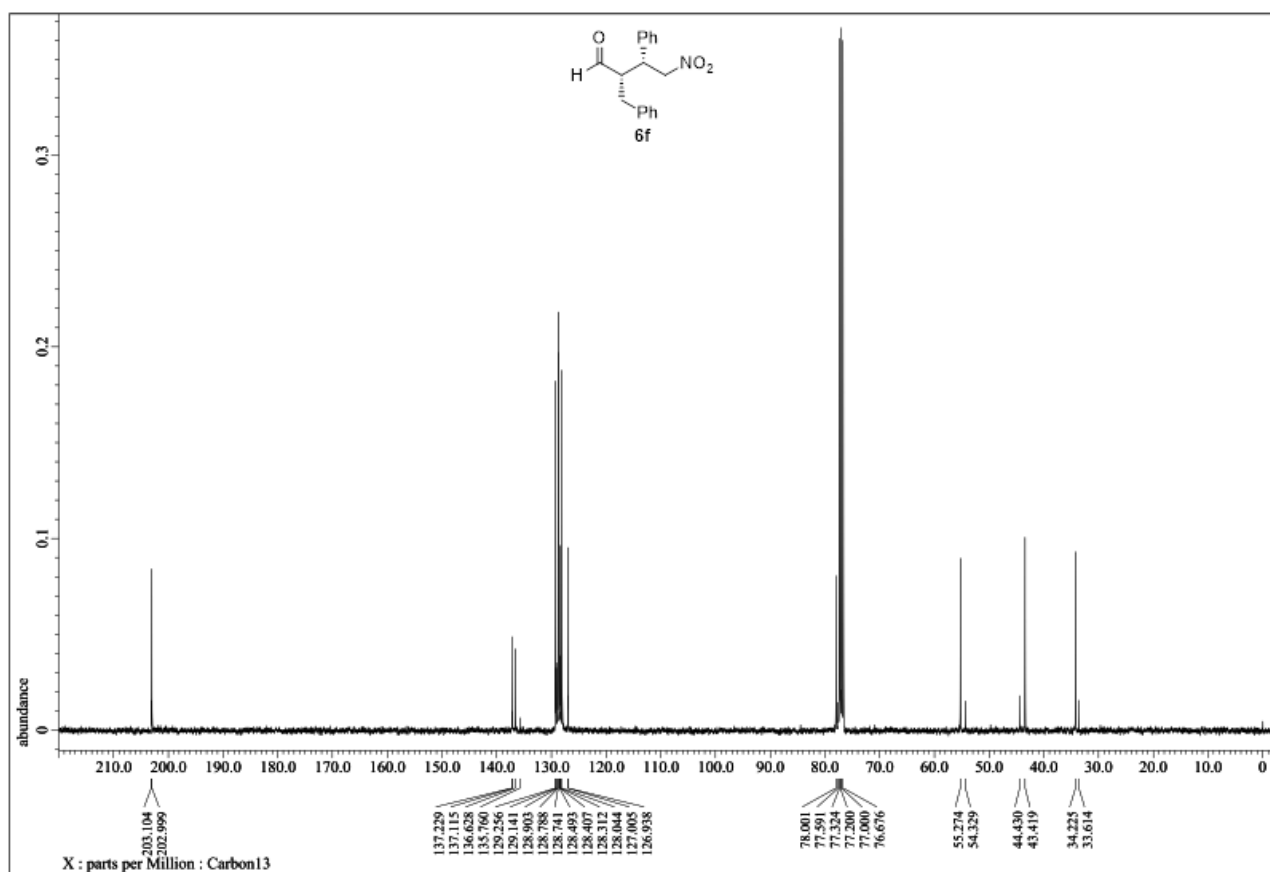

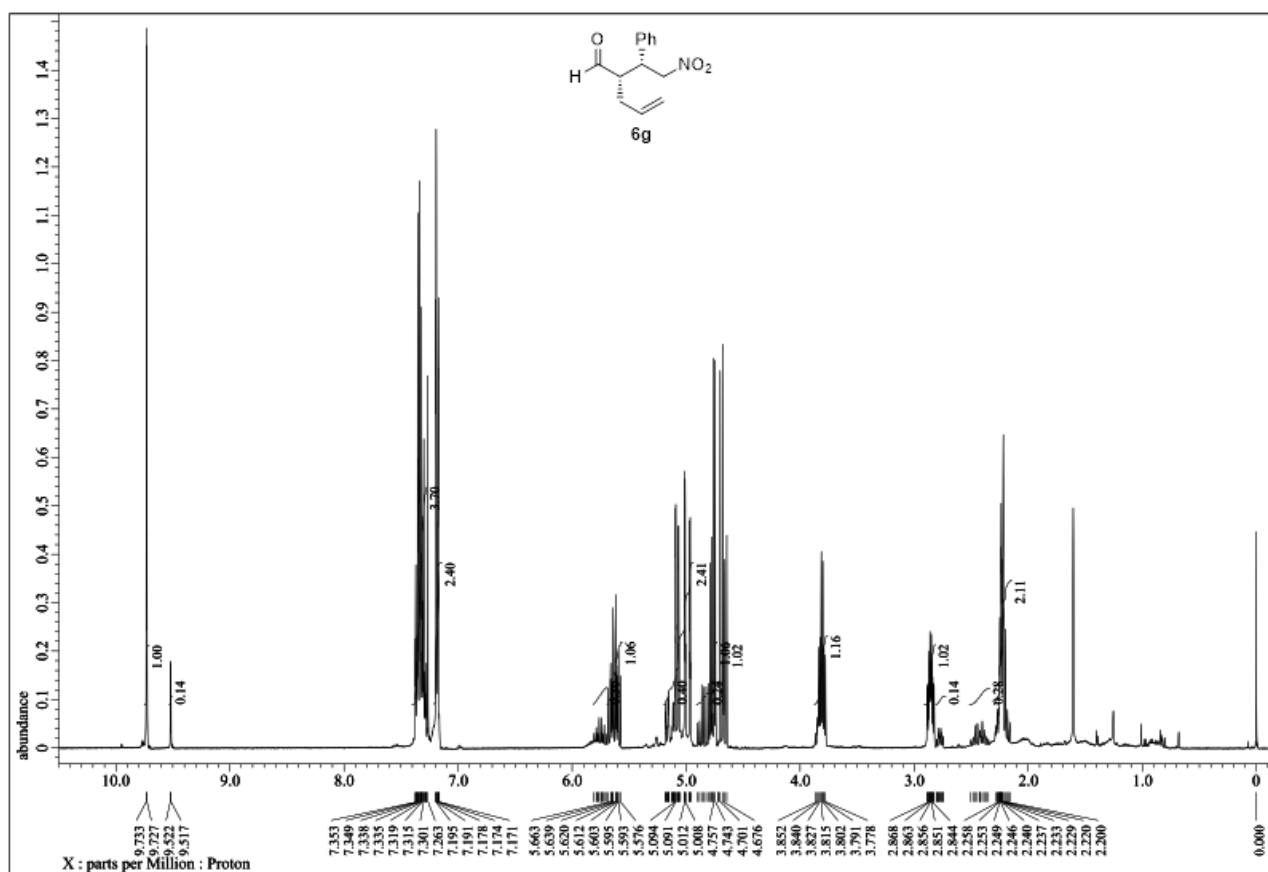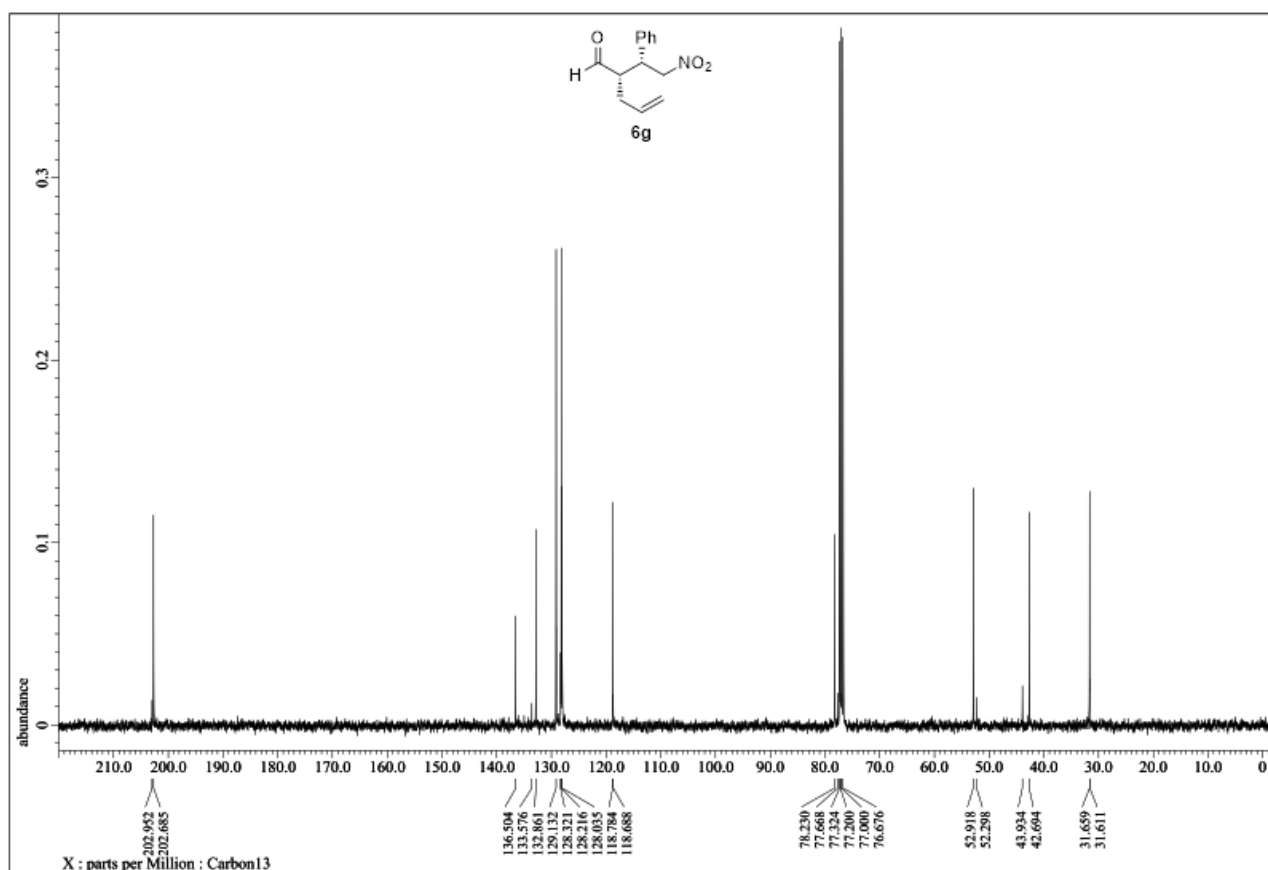



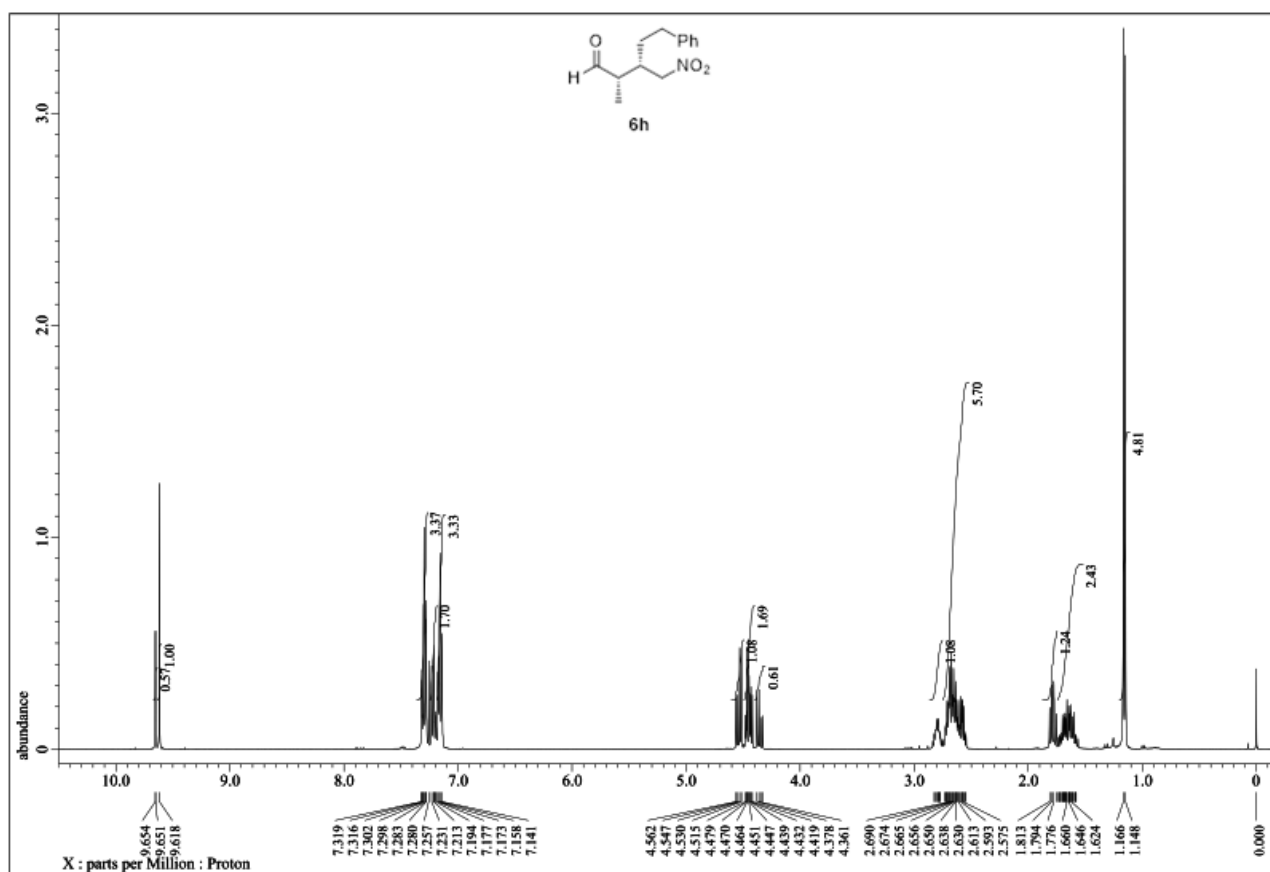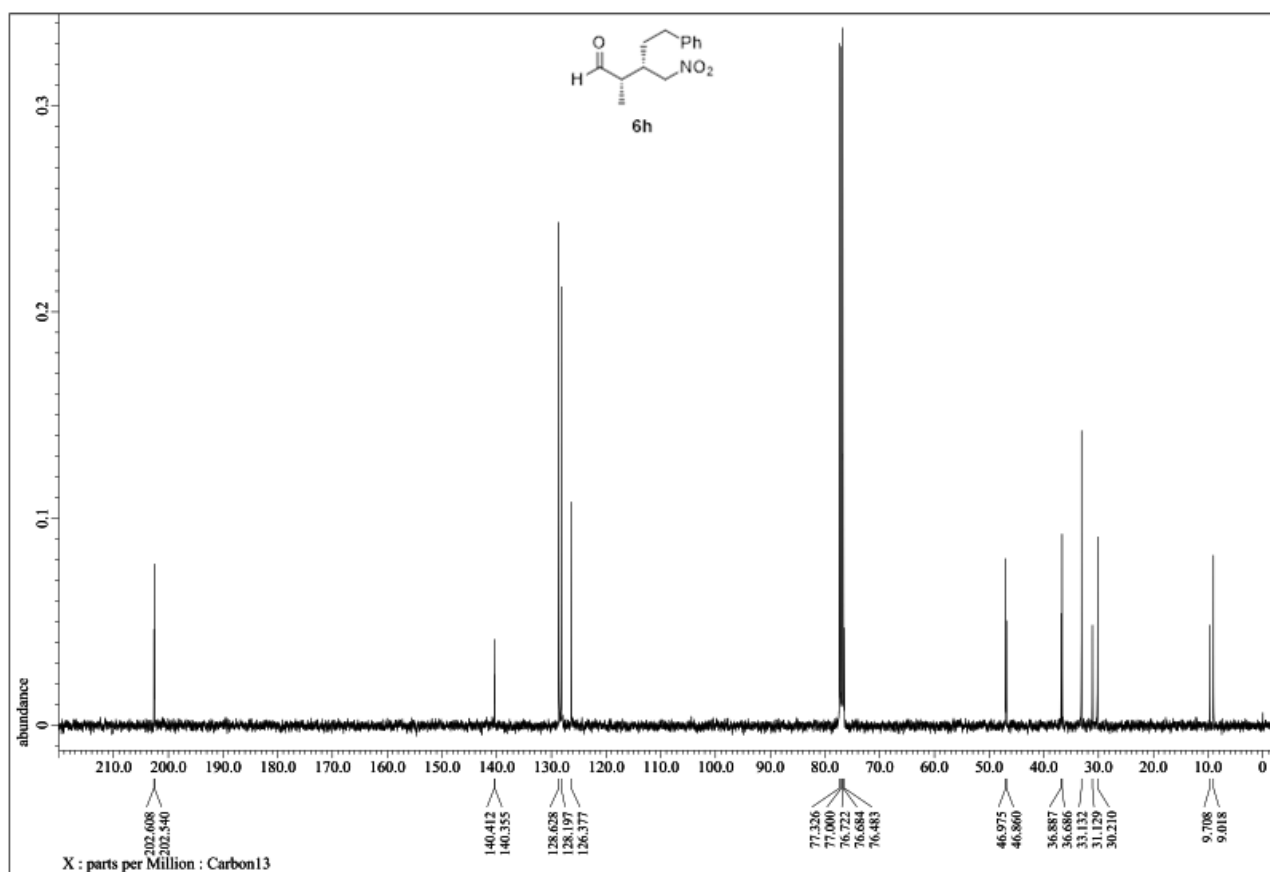

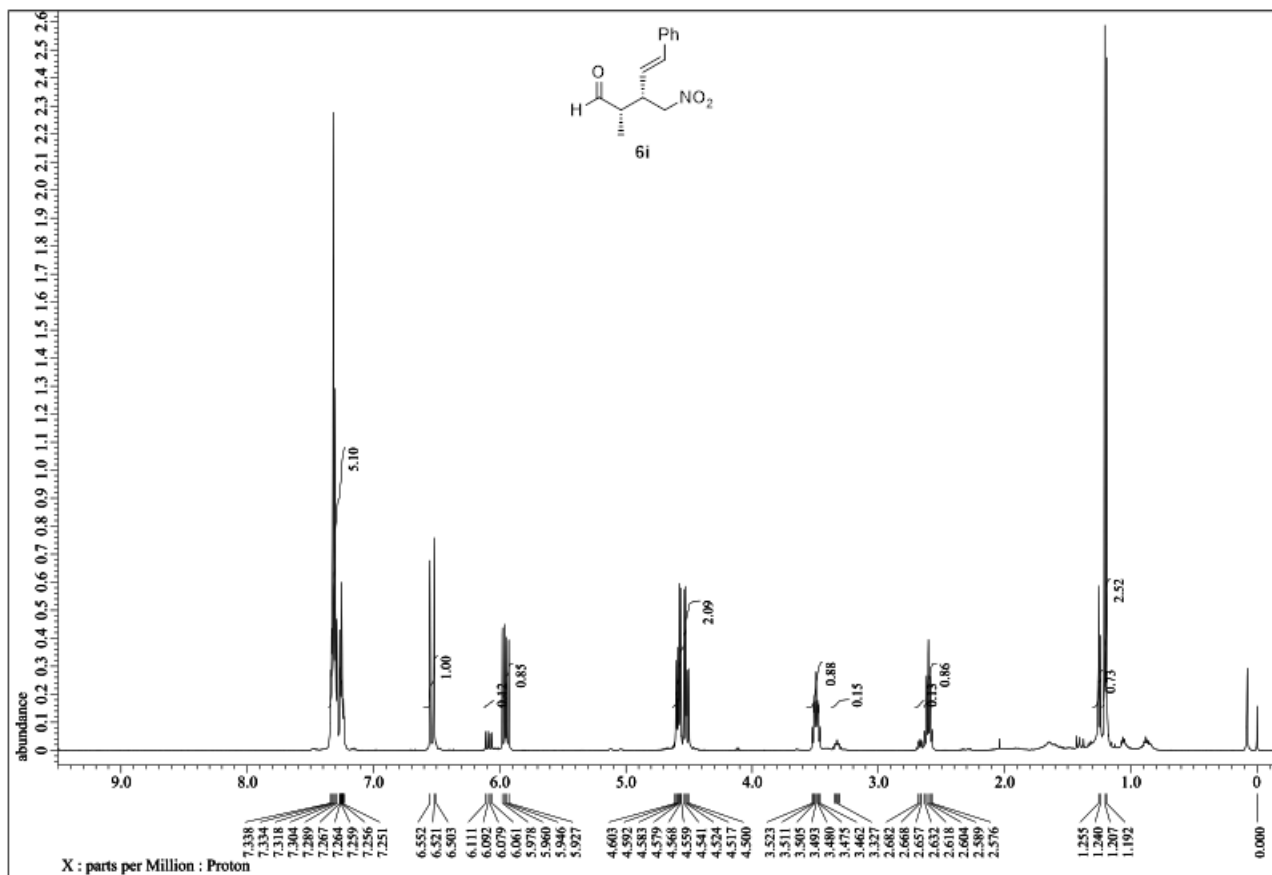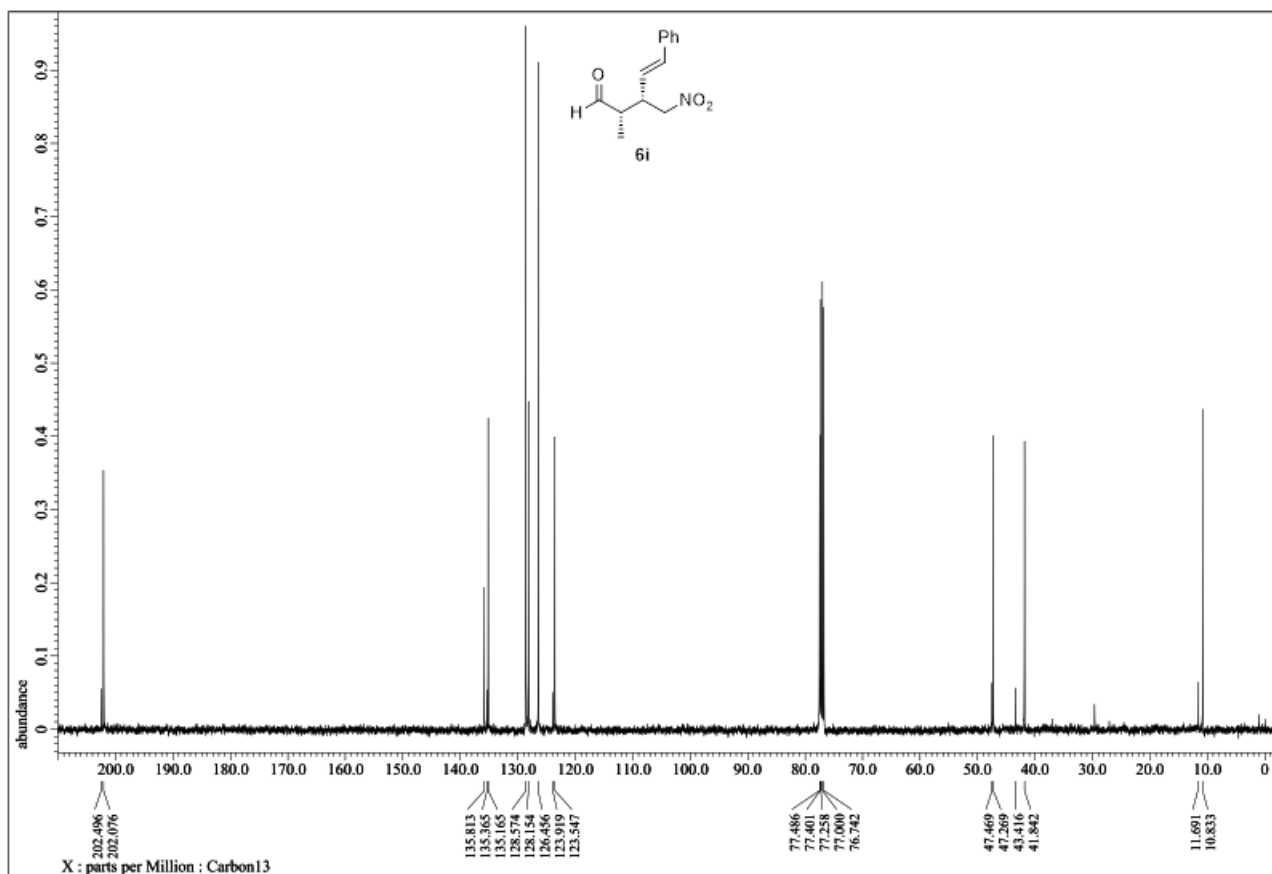

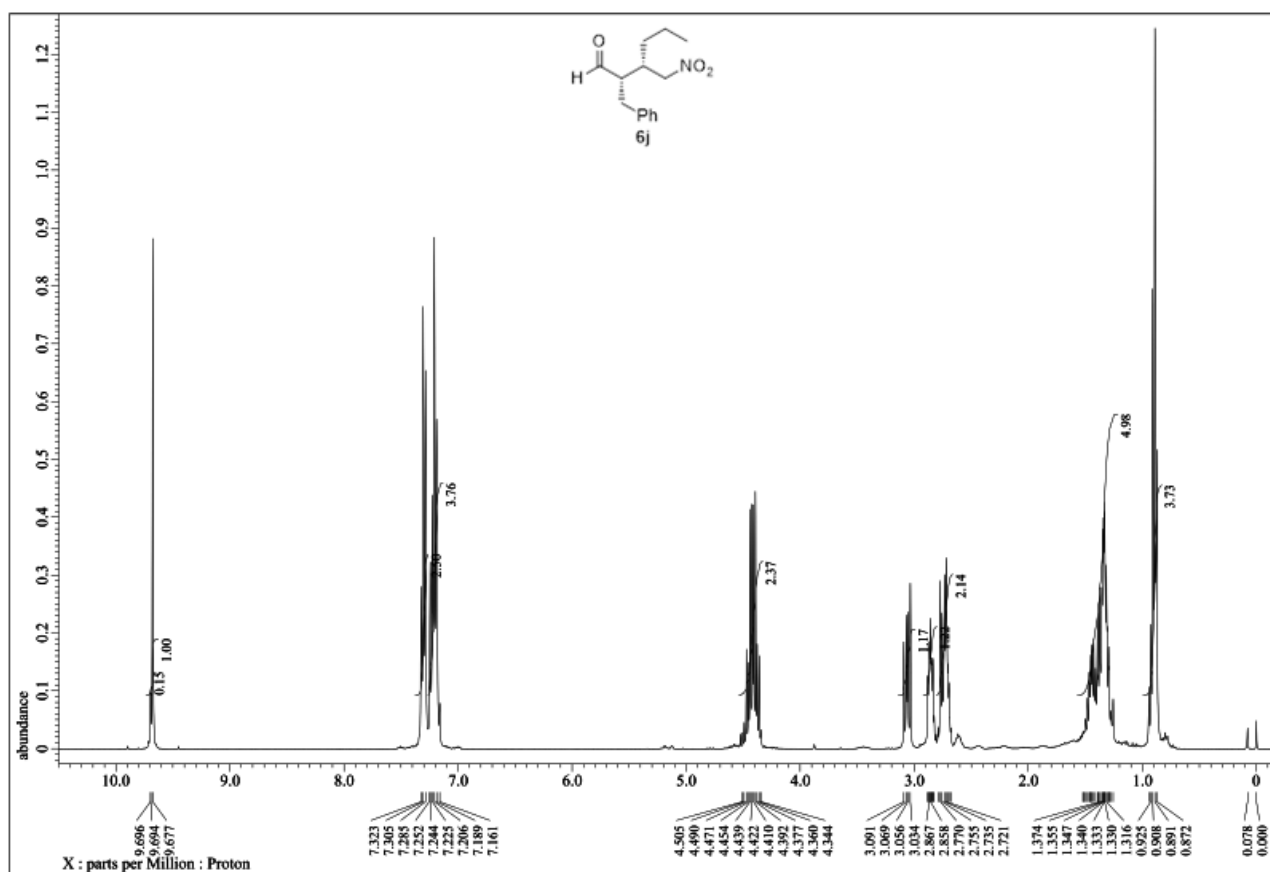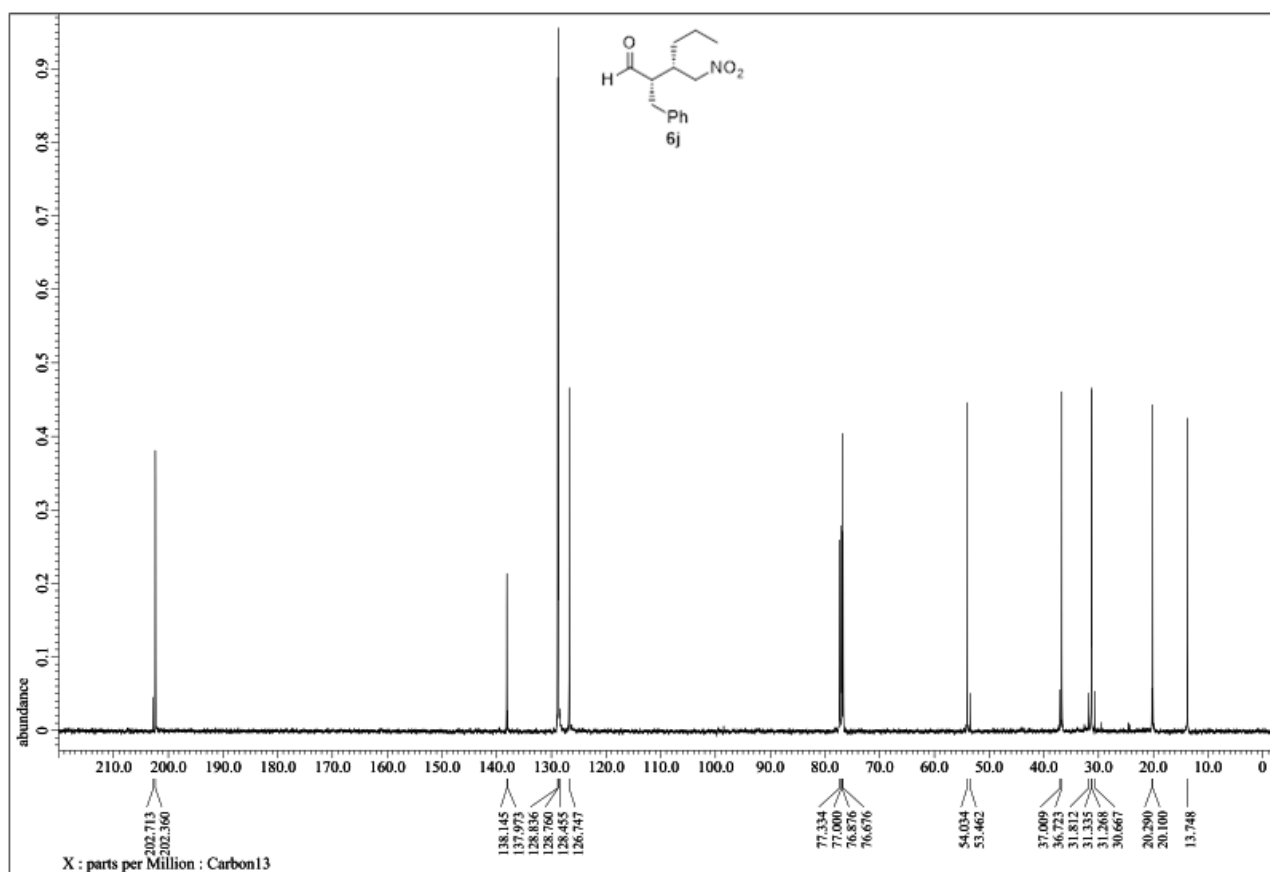

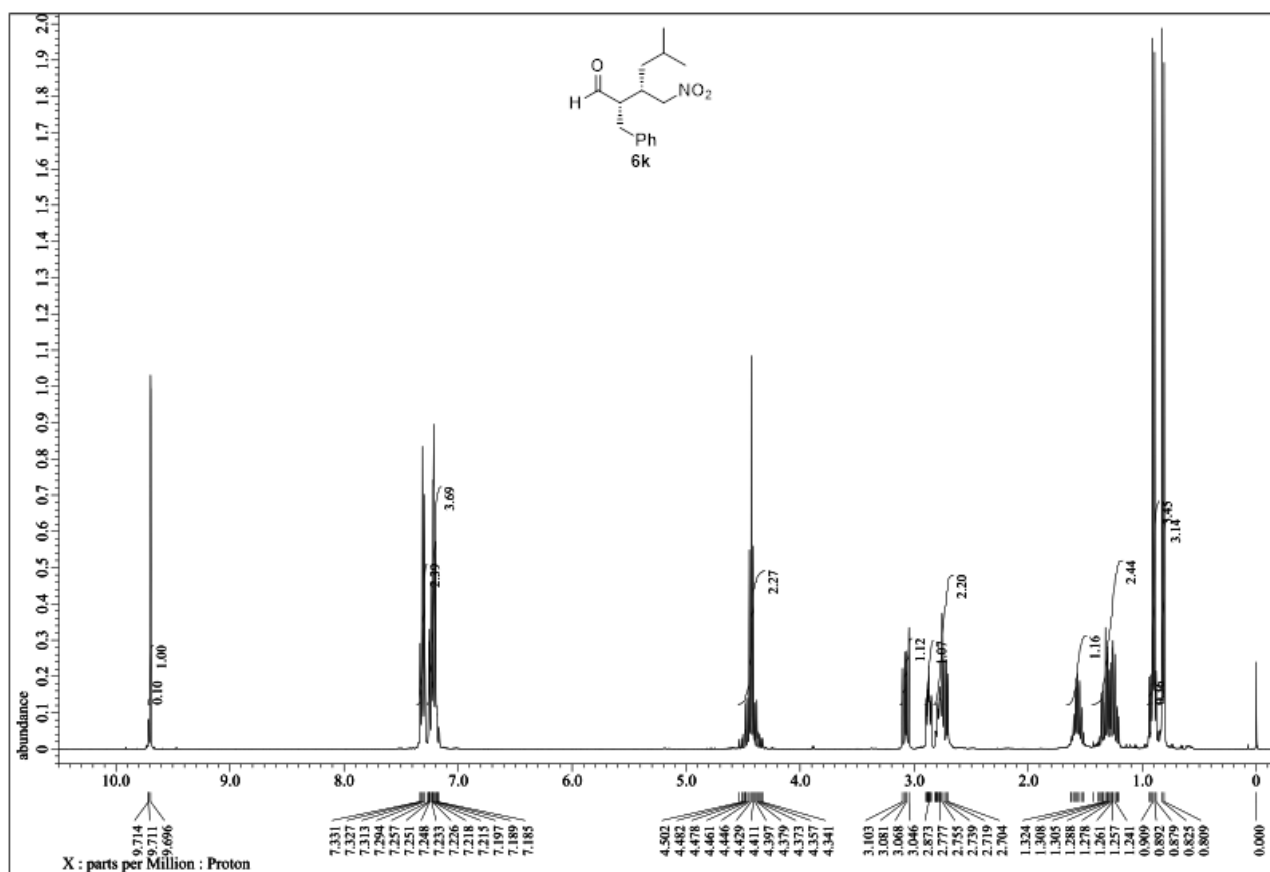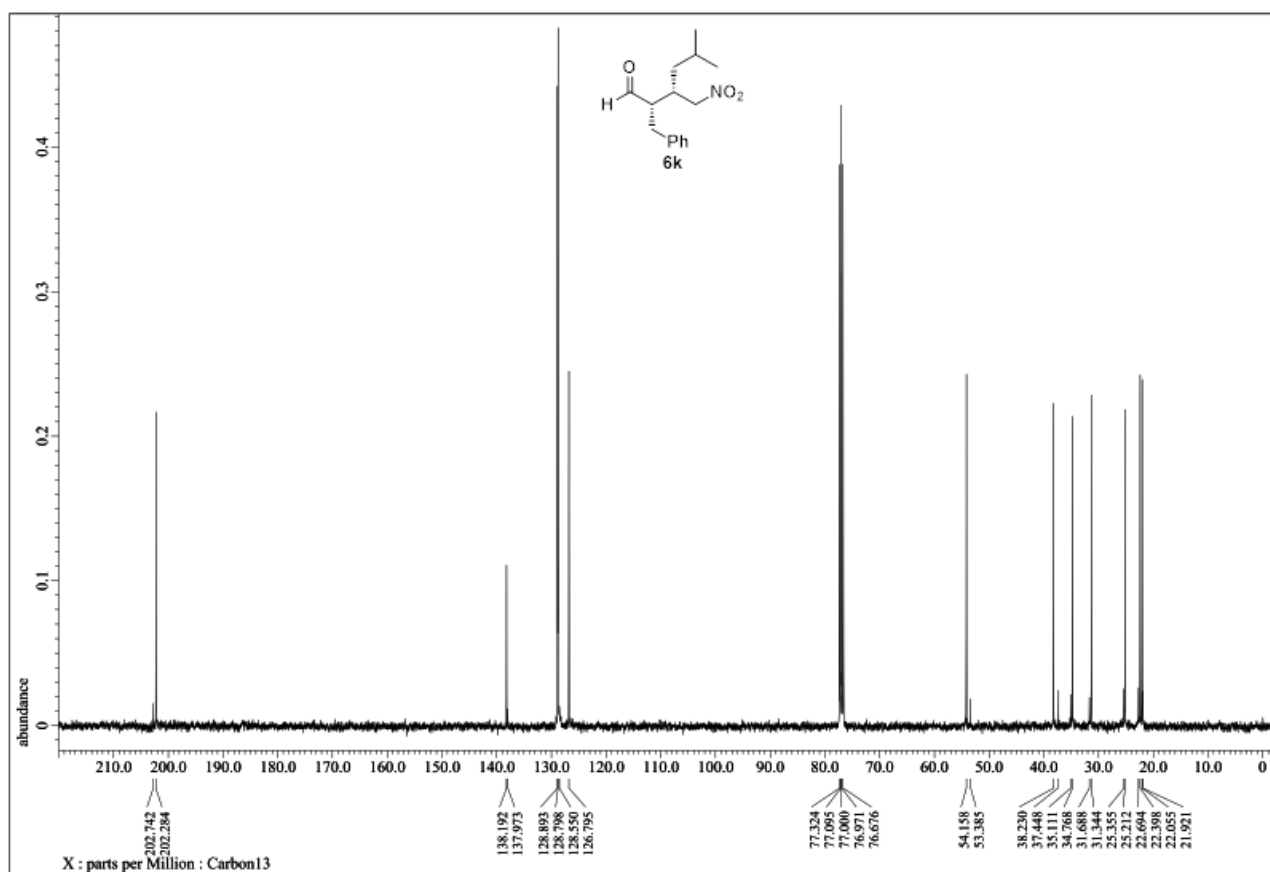

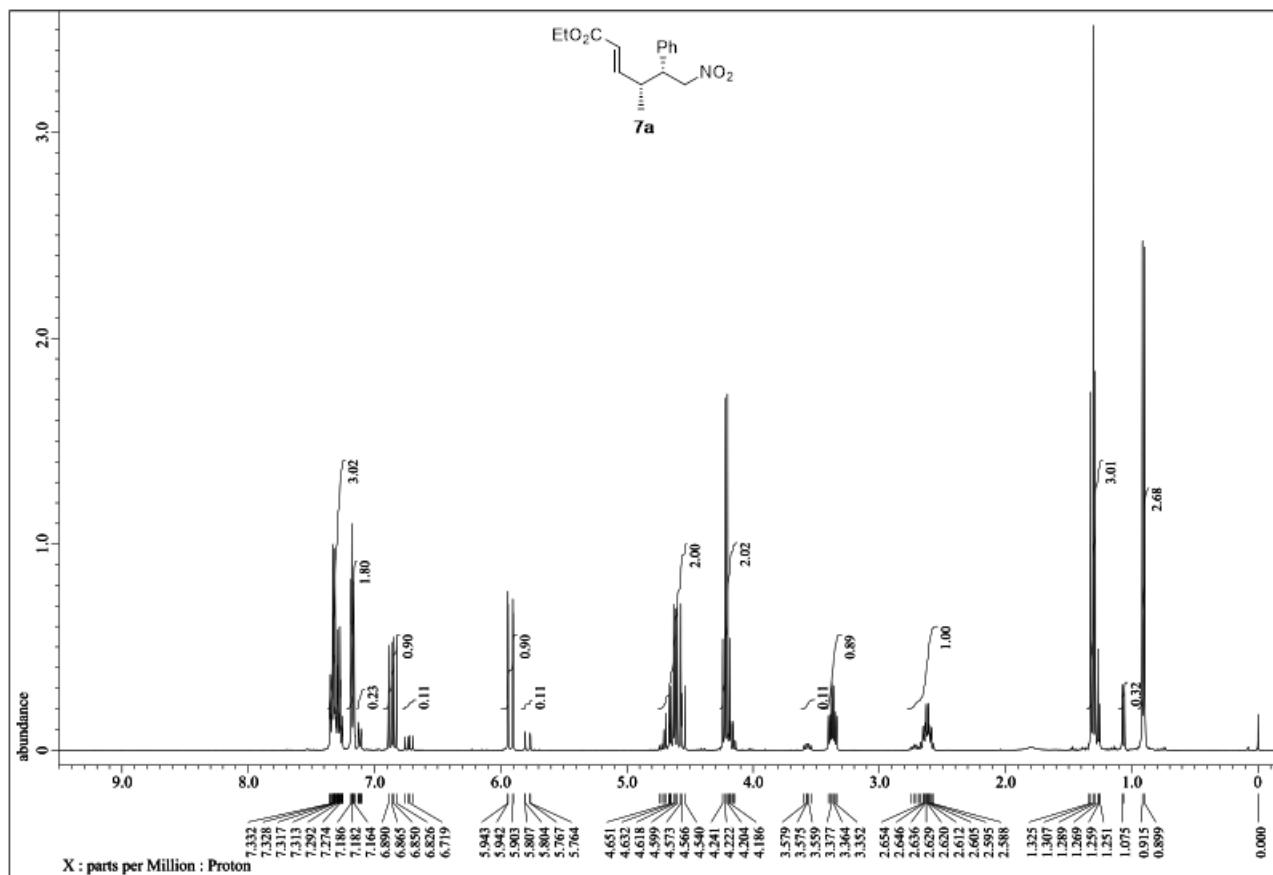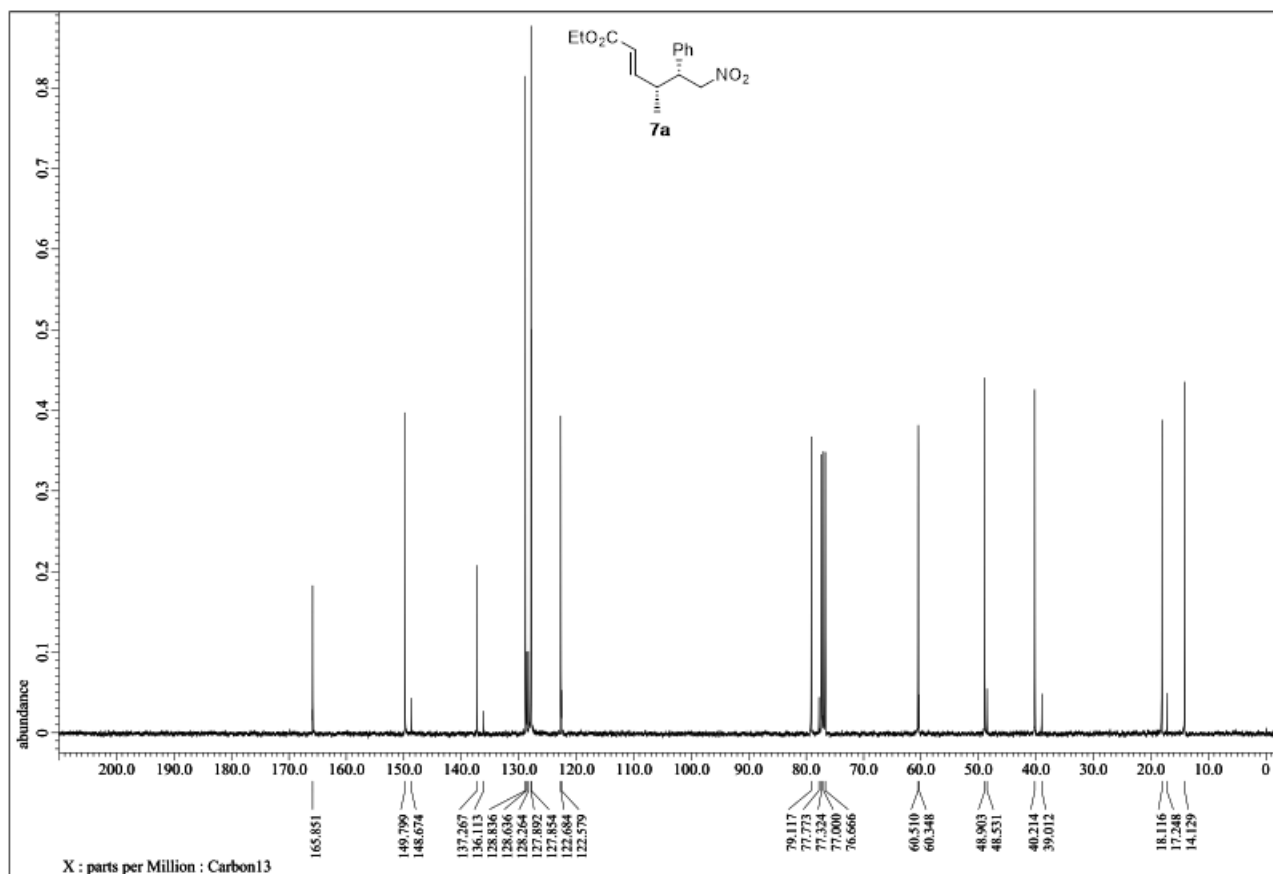

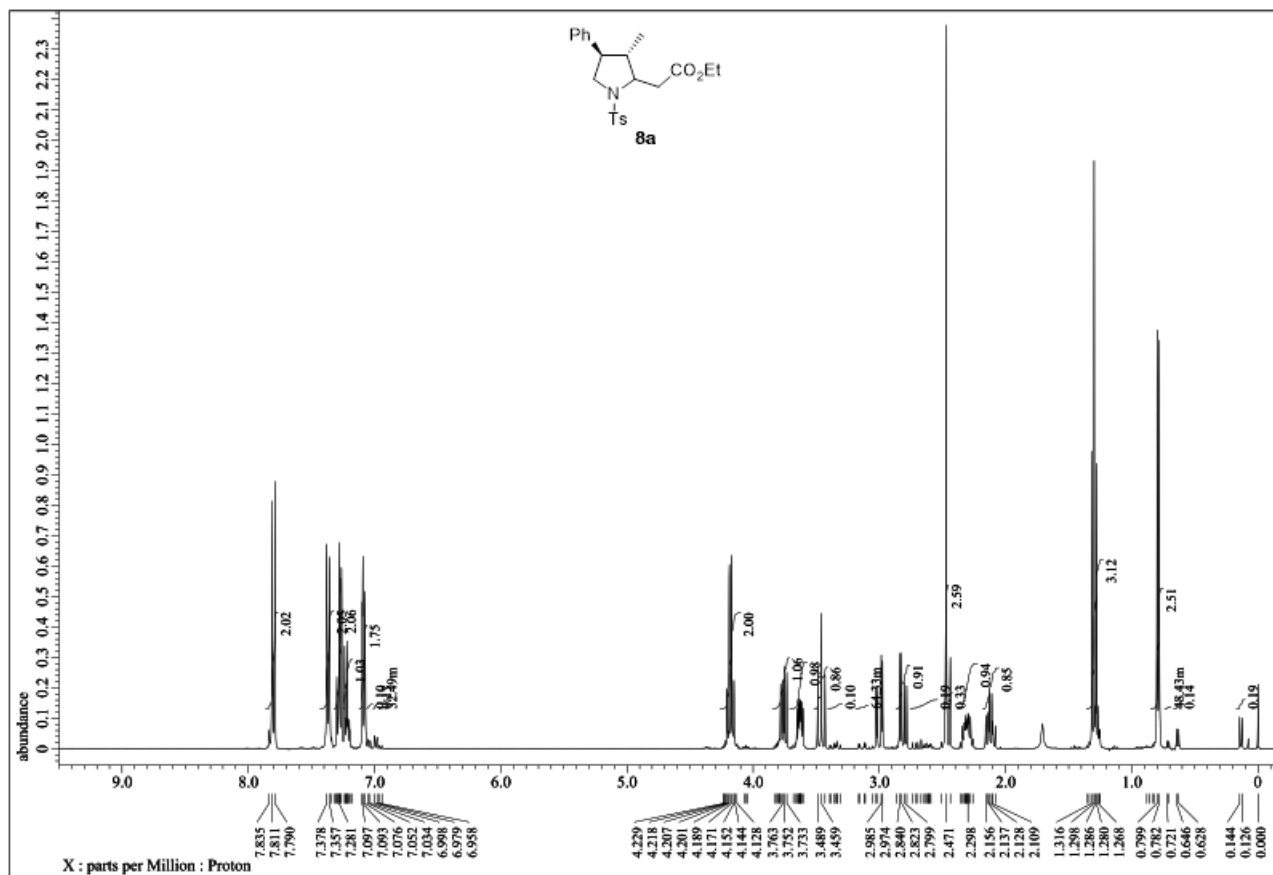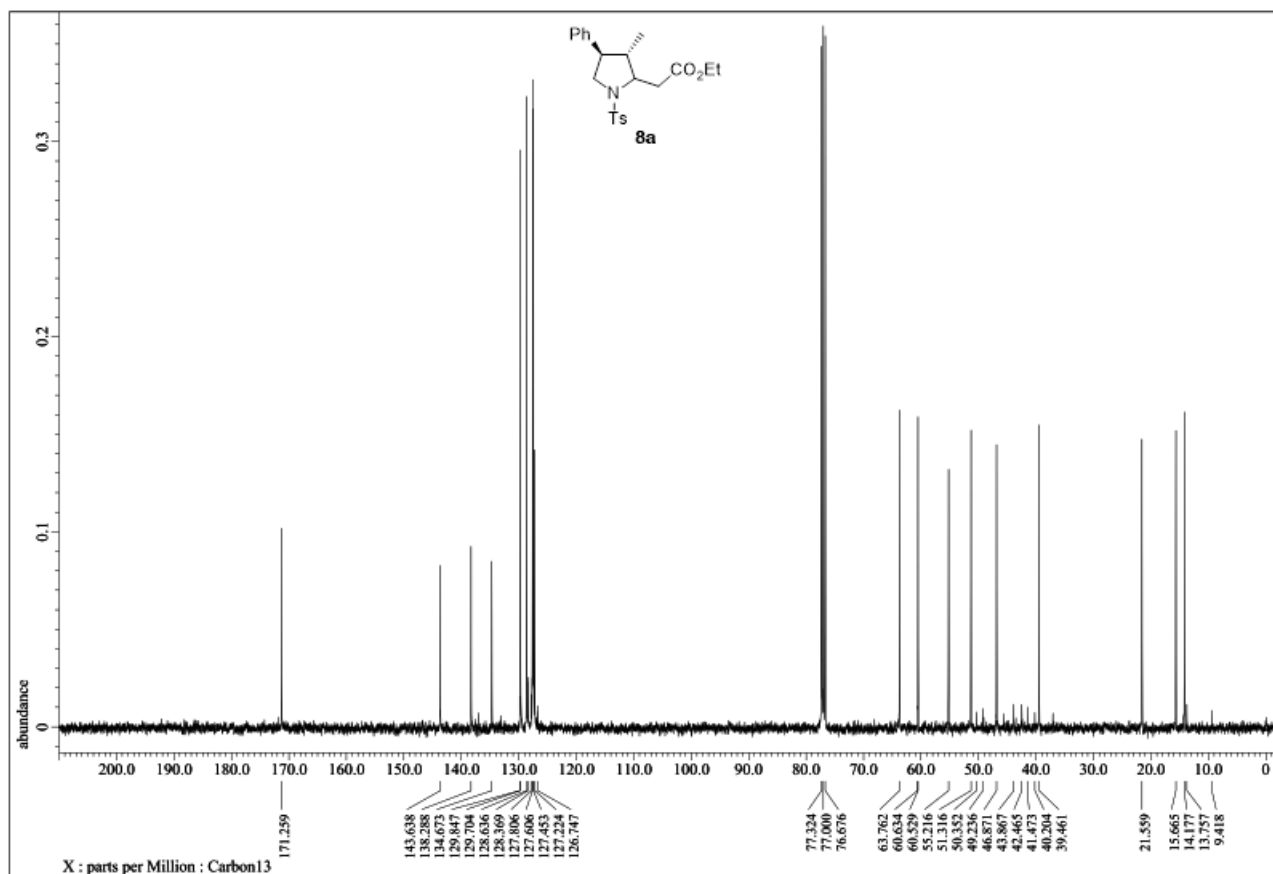

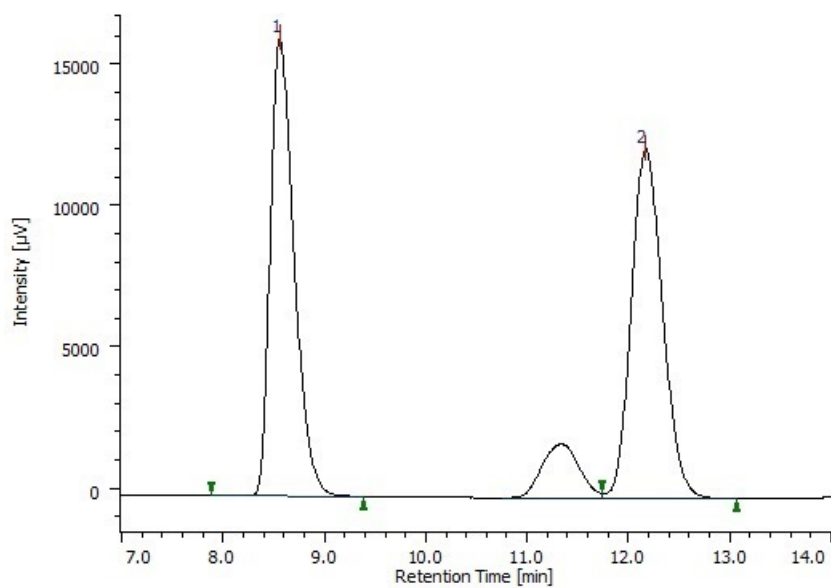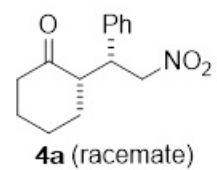

| peak No. | tR (min) | Area   | High ( $\mu\text{V}$ ) | Area (%) |
|----------|----------|--------|------------------------|----------|
| 1        | 8.558    | 262858 | 16171                  | 49.9     |
| 2        | 12.158   | 263914 | 12310                  | 50.1     |
| Total    |          | 526772 | 28481                  | 100.000  |

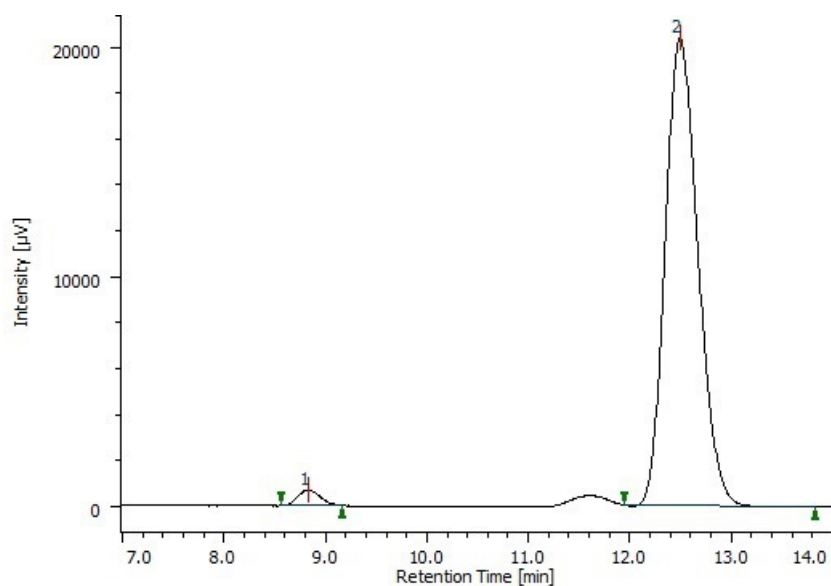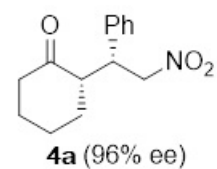

| peak No. | tR (min) | Area   | High ( $\mu\text{V}$ ) | Area (%) |
|----------|----------|--------|------------------------|----------|
| 1        | 8.825    | 10340  | 683                    | 2.227    |
| 2        | 12.483   | 454034 | 20304                  | 97.773   |
| Total    |          | 464374 | 20987                  | 100.000  |

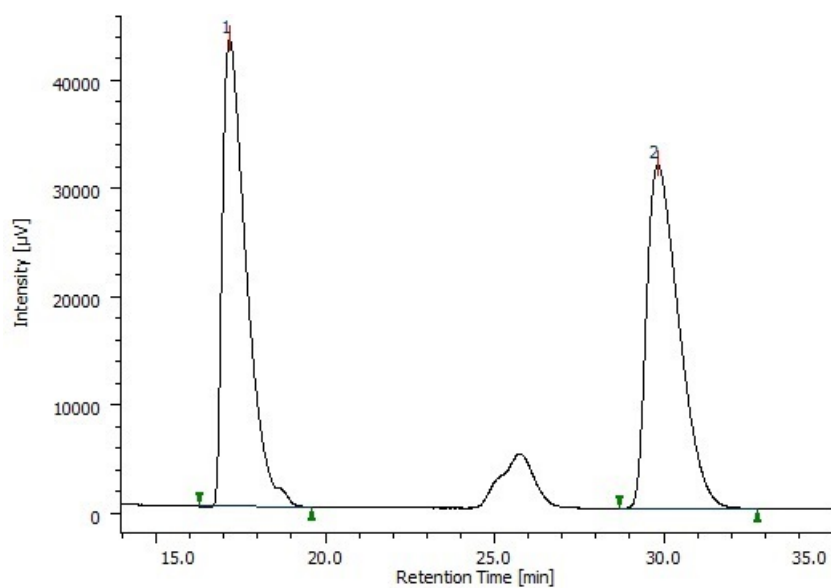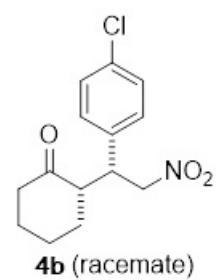

| peak No. | tR (min) | Area    | High ( $\mu\text{V}$ ) | Area (%) |
|----------|----------|---------|------------------------|----------|
| 1        | 17.167   | 2110973 | 43162                  | 50.14    |
| 2        | 29.792   | 2099217 | 31684                  | 49.86    |
| Total    |          | 4210190 | 74846                  | 100.000  |

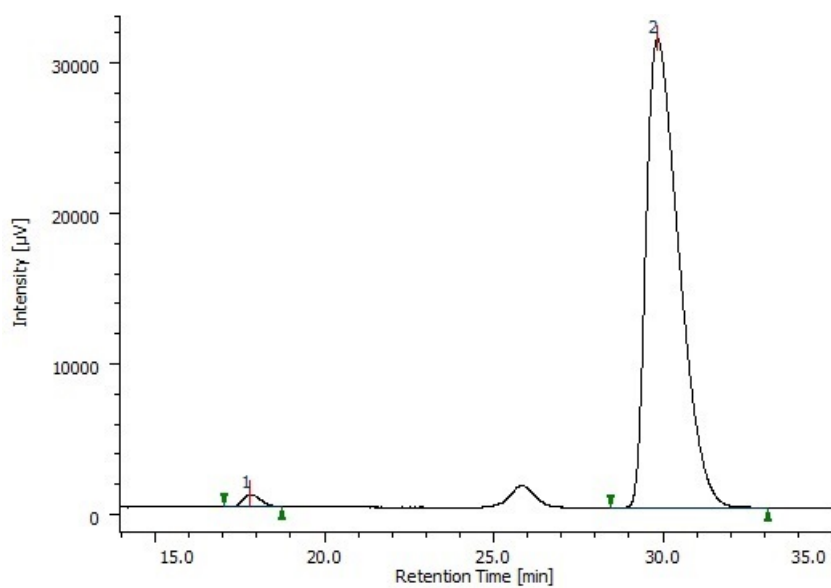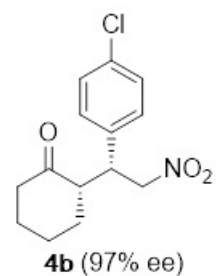

| peak No. | tR (min) | Area    | High ( $\mu\text{V}$ ) | Area (%) |
|----------|----------|---------|------------------------|----------|
| 1        | 17.800   | 30314   | 821                    | 1.431    |
| 2        | 29.808   | 2087889 | 31067                  | 98.569   |
| Total    |          | 2118203 | 31888                  | 100.000  |



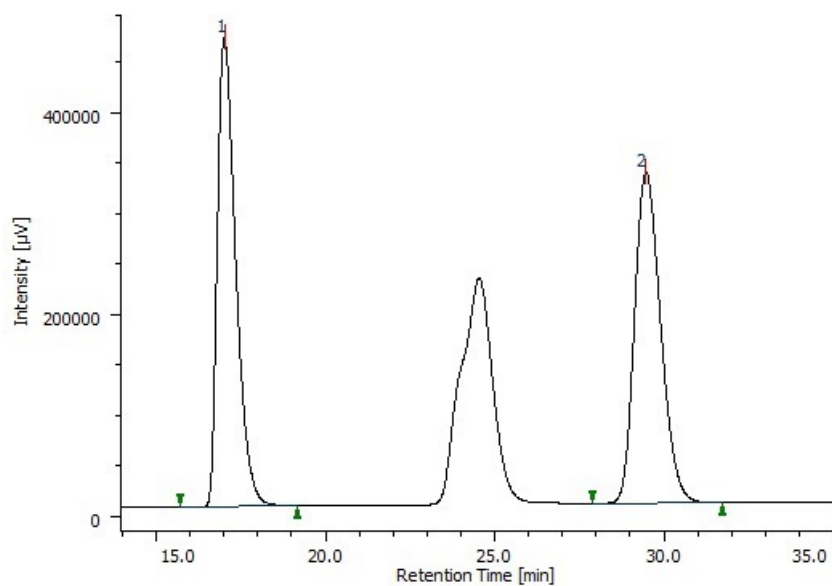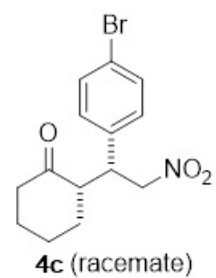

| peak No. | tR (min) | Area     | High ( $\mu\text{V}$ ) | Area (%) |
|----------|----------|----------|------------------------|----------|
| 1        | 17.008   | 17470360 | 463794                 | 50.088   |
| 2        | 29.442   | 17408781 | 326818                 | 49.912   |
| Total    |          | 34879141 | 790612                 | 100.000  |

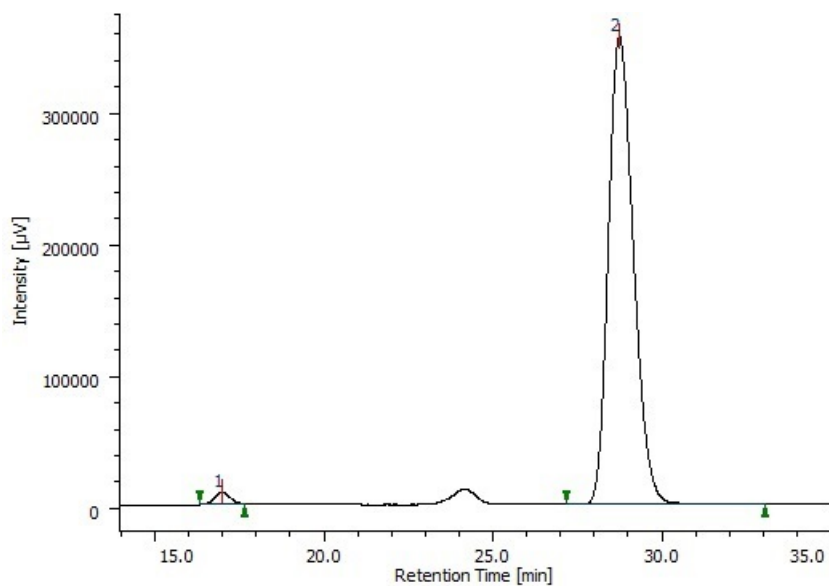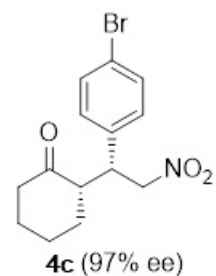

| peak No. | tR (min) | Area     | High ( $\mu\text{V}$ ) | Area (%) |
|----------|----------|----------|------------------------|----------|
| 1        | 16.967   | 290623   | 9128                   | 1.562    |
| 2        | 28.708   | 18310933 | 354579                 | 98.438   |
| Total    |          | 18601556 | 363707                 | 100.000  |

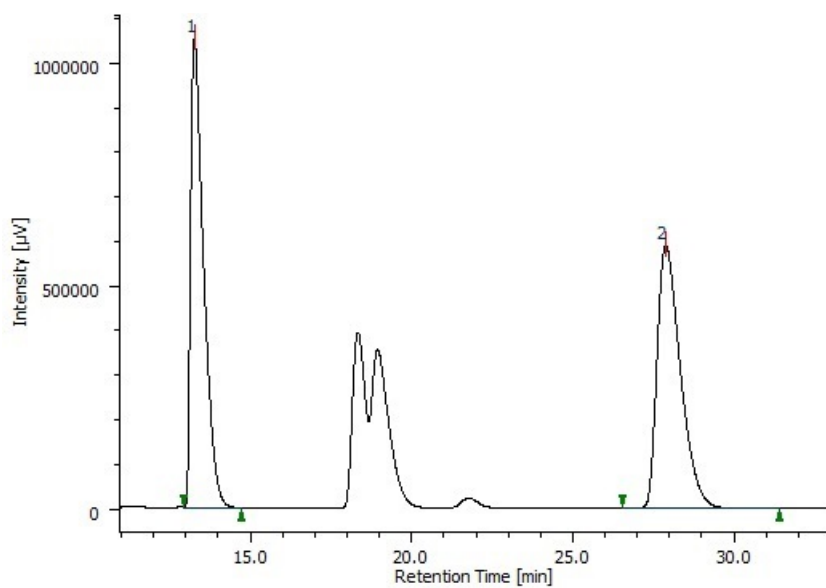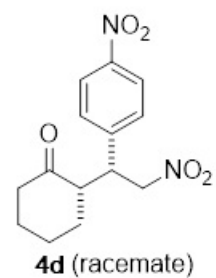

| peak No. | tR (min) | Area     | High ( $\mu\text{V}$ ) | Area (%) |
|----------|----------|----------|------------------------|----------|
| 1        | 13.267   | 29485300 | 1051888                | 49.912   |
| 2        | 27.850   | 29588792 | 588293                 | 50.088   |
| Total    |          | 59074092 | 1640181                | 100.000  |

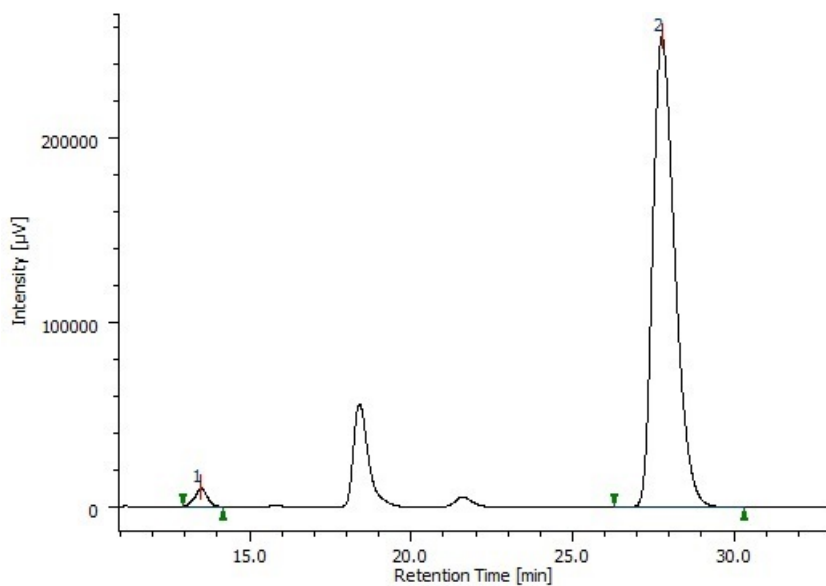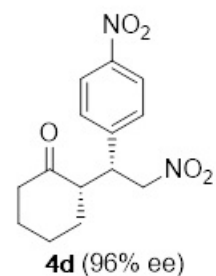

| peak No. | tR (min) | Area     | High ( $\mu\text{V}$ ) | Area (%) |
|----------|----------|----------|------------------------|----------|
| 1        | 13.500   | 264816   | 9850                   | 2.155    |
| 2        | 27.733   | 12021987 | 254133                 | 97.845   |
| Total    |          | 12286803 | 263983                 | 100.000  |

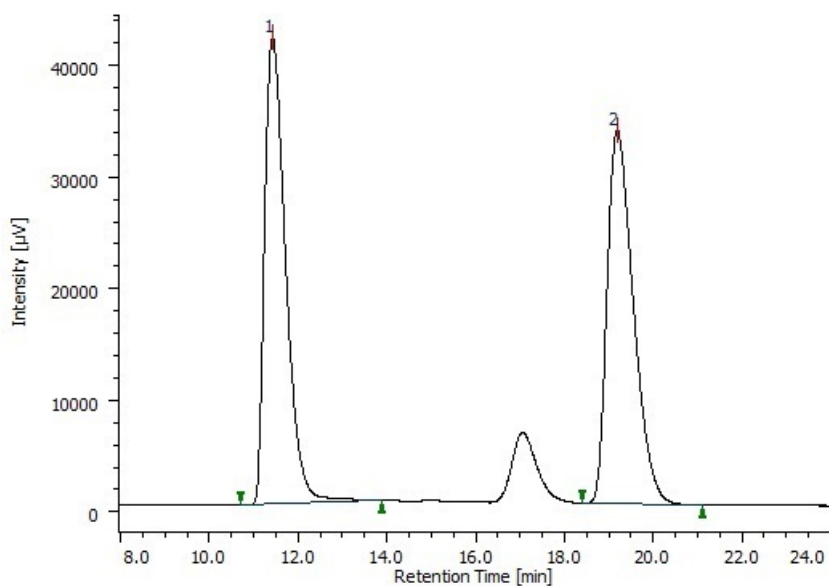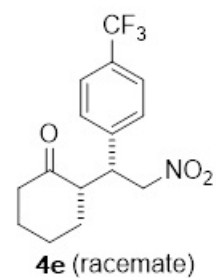

| peak No. | tR (min) | Area    | High (µV) | Area (%) |
|----------|----------|---------|-----------|----------|
| 1        | 11.417   | 1367791 | 41690     | 50.063   |
| 2        | 19.167   | 1364334 | 33352     | 49.937   |
| Total    |          | 2732125 | 75042     | 100.000  |

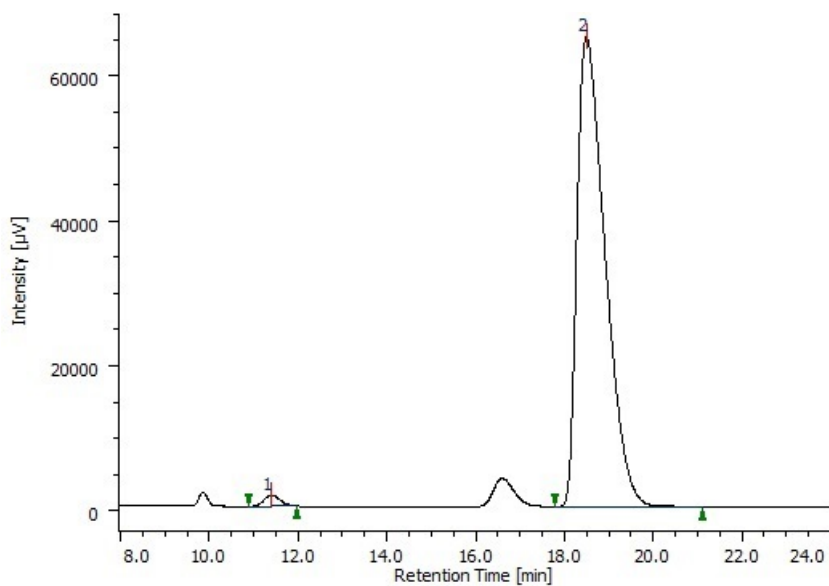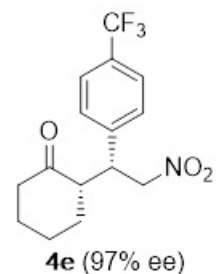

| peak No. | tR (min) | Area    | High (µV) | Area (%) |
|----------|----------|---------|-----------|----------|
| 1        | 11.400   | 38606   | 1530      | 1.346    |
| 2        | 18.475   | 2830572 | 64661     | 98.654   |
| Total    |          | 2869178 | 66191     | 100.000  |

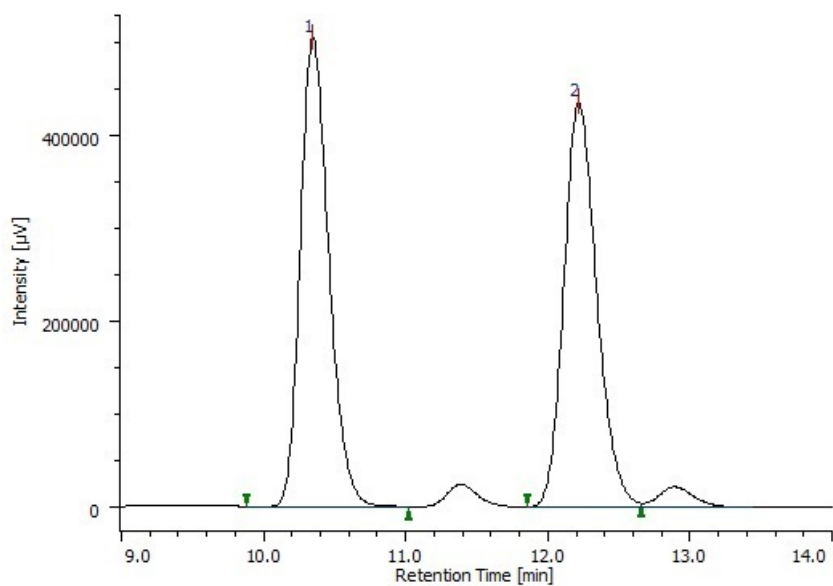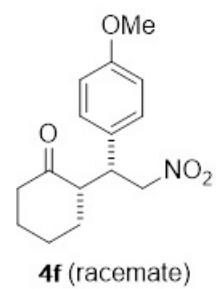

| peak No. | tR (min) | Area     | High ( $\mu\text{V}$ ) | Area (%) |
|----------|----------|----------|------------------------|----------|
| 1        | 10.342   | 6994803  | 503853                 | 50.058   |
| 2        | 12.208   | 6978544  | 434193                 | 49.942   |
| Total    |          | 13973347 | 938046                 | 100.000  |

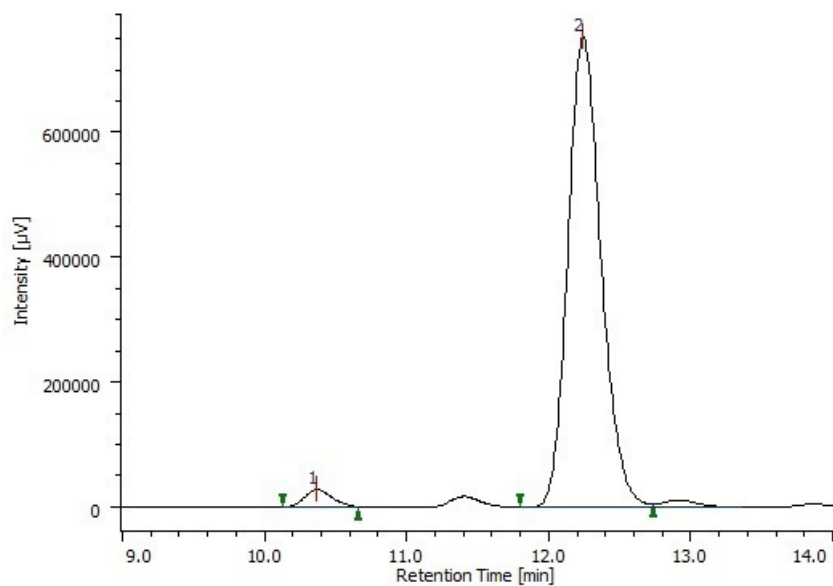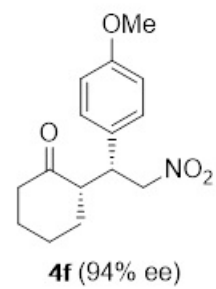

| peak No. | tR (min) | Area     | High ( $\mu\text{V}$ ) | Area (%) |
|----------|----------|----------|------------------------|----------|
| 1        | 10.367   | 367411   | 27563                  | 2.925    |
| 2        | 12.233   | 12193580 | 752017                 | 97.075   |
| Total    |          | 12560991 | 779580                 | 100.000  |

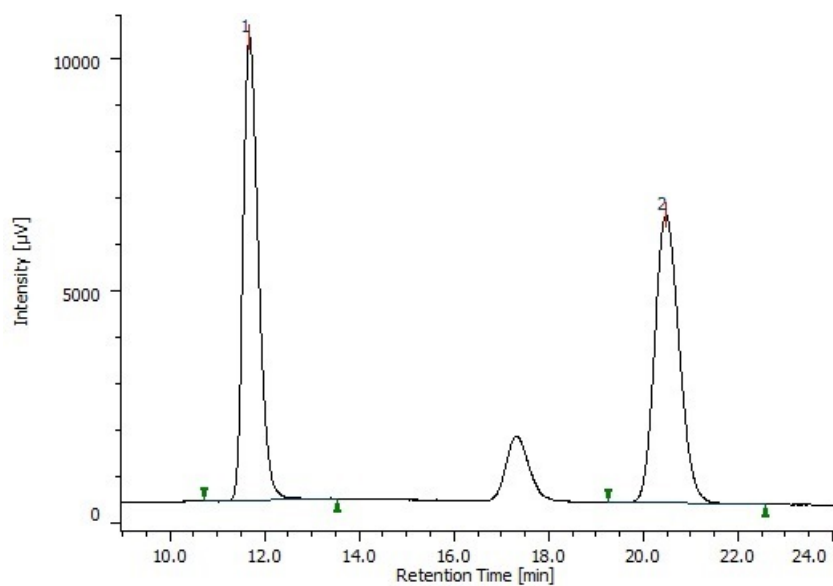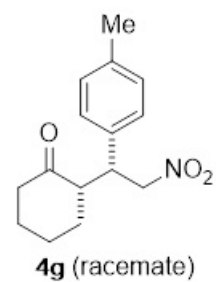

| peak No. | tR (min) | Area   | High ( $\mu\text{V}$ ) | Area (%) |
|----------|----------|--------|------------------------|----------|
| 1        | 11.683   | 221640 | 9925                   | 50.158   |
| 2        | 20.458   | 220246 | 6165                   | 49.842   |
| Total    |          | 441886 | 16090                  | 100.000  |

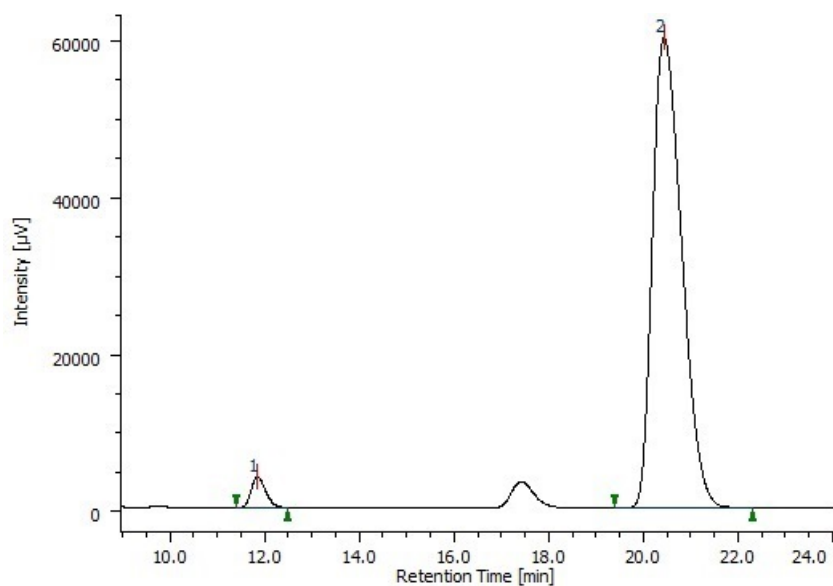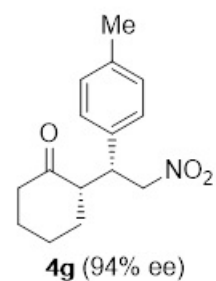

| peak No. | tR (min) | Area    | High ( $\mu\text{V}$ ) | Area (%) |
|----------|----------|---------|------------------------|----------|
| 1        | 11.842   | 82270   | 3886                   | 3.111    |
| 2        | 20.417   | 2561967 | 59730                  | 96.889   |
| Total    |          | 2644237 | 63616                  | 100.000  |

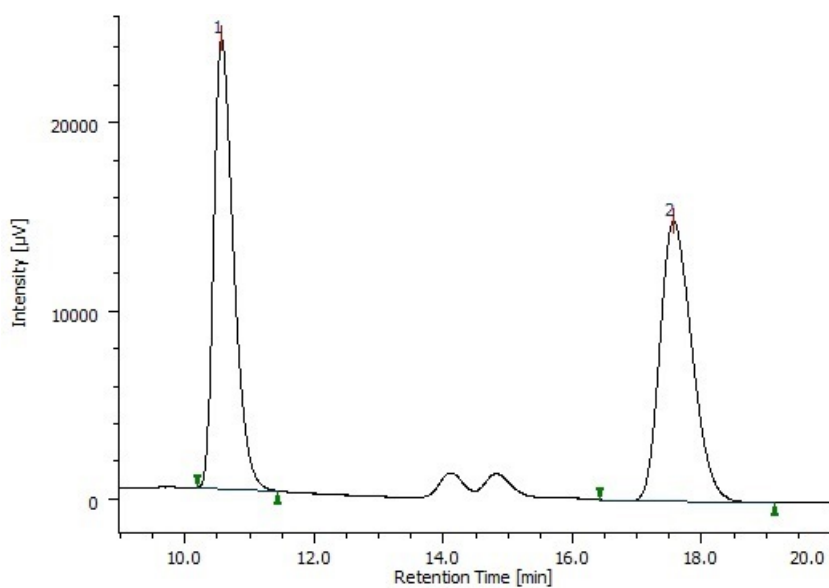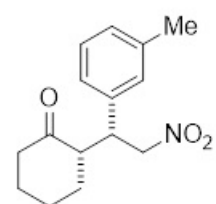

**4h** (racemate)

| peak No. | tR (min) | Area    | High ( $\mu\text{V}$ ) | Area (%) |
|----------|----------|---------|------------------------|----------|
| 1        | 10.567   | 508500  | 23824                  | 50.082   |
| 2        | 17.550   | 506830  | 14820                  | 49.918   |
| Total    |          | 1015330 | 38644                  | 100.000  |

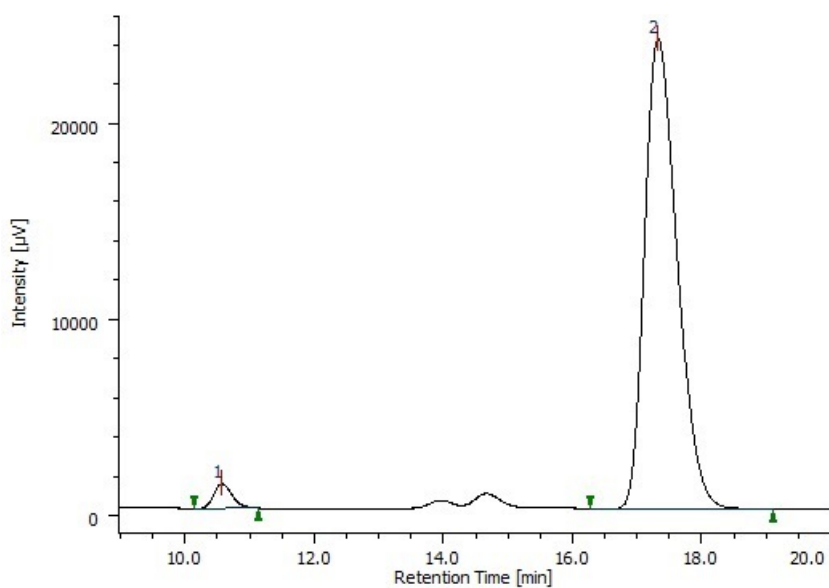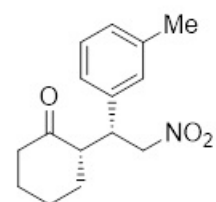

**4h** (94% ee)

| peak No. | tR (min) | Area   | High ( $\mu\text{V}$ ) | Area (%) |
|----------|----------|--------|------------------------|----------|
| 1        | 10.567   | 25229  | 1254                   | 2.916    |
| 2        | 17.308   | 839965 | 23903                  | 97.084   |
| Total    |          | 865194 | 25157                  | 100.000  |

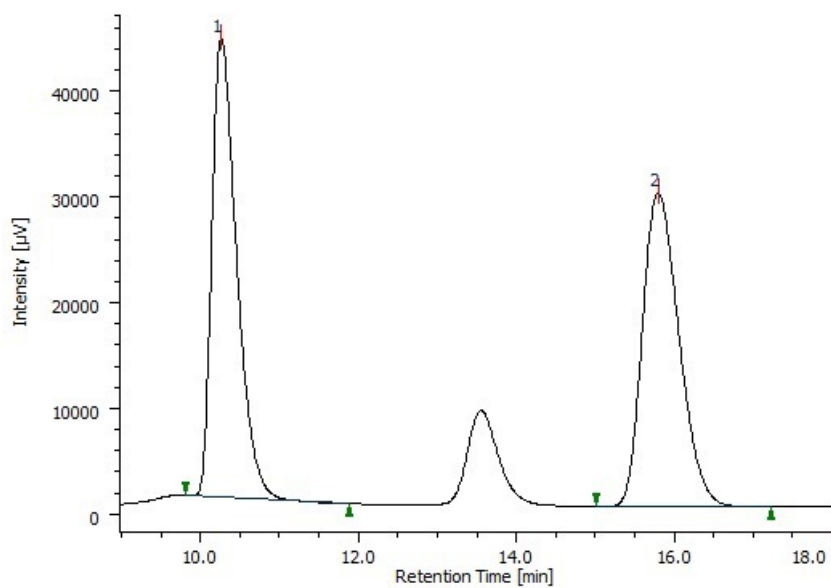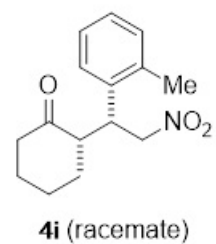

| peak No. | tR (min) | Area    | High ( $\mu\text{V}$ ) | Area (%) |
|----------|----------|---------|------------------------|----------|
| 1        | 10.267   | 945766  | 43403                  | 49.849   |
| 2        | 15.783   | 951496  | 29645                  | 50.151   |
| Total    |          | 1897262 | 73048                  | 100.000  |

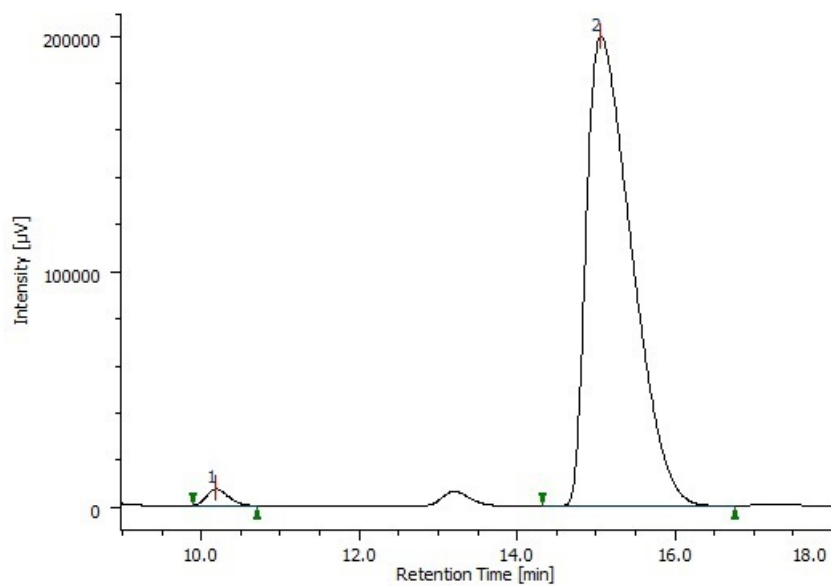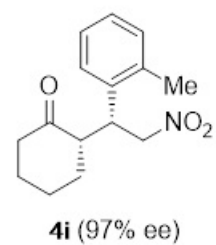

| peak No. | tR (min) | Area    | High ( $\mu\text{V}$ ) | Area (%) |
|----------|----------|---------|------------------------|----------|
| 1        | 10.183   | 133584  | 6987                   | 1.671    |
| 2        | 15.050   | 7860579 | 198655                 | 98.329   |
| Total    |          | 7994163 | 205642                 | 100.000  |

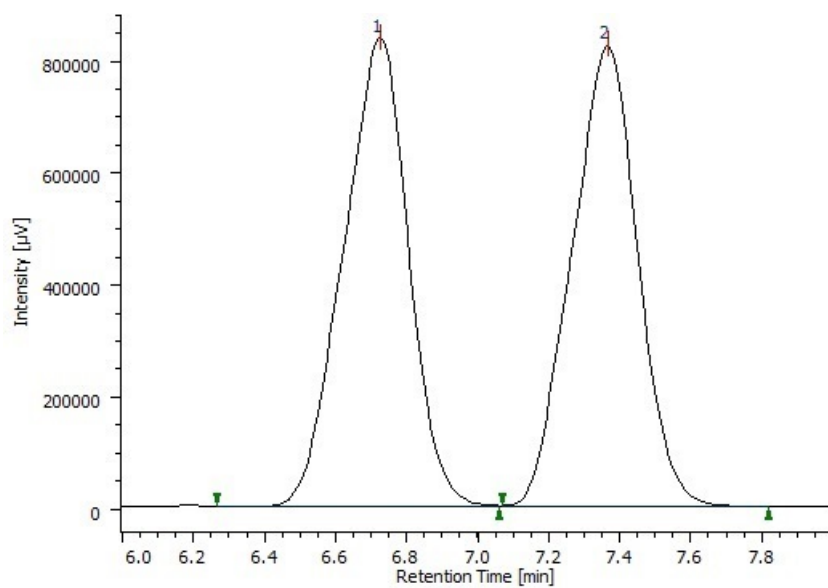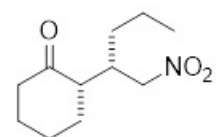

**4j** (racemate)

| peak No. | tR (min) | Area     | High (µV) | Area (%) |
|----------|----------|----------|-----------|----------|
| 1        | 6.725    | 10559430 | 834753    | 50.026   |
| 2        | 7.367    | 10548643 | 821374    | 49.974   |
| Total    |          | 21108073 | 1656127   | 100.000  |

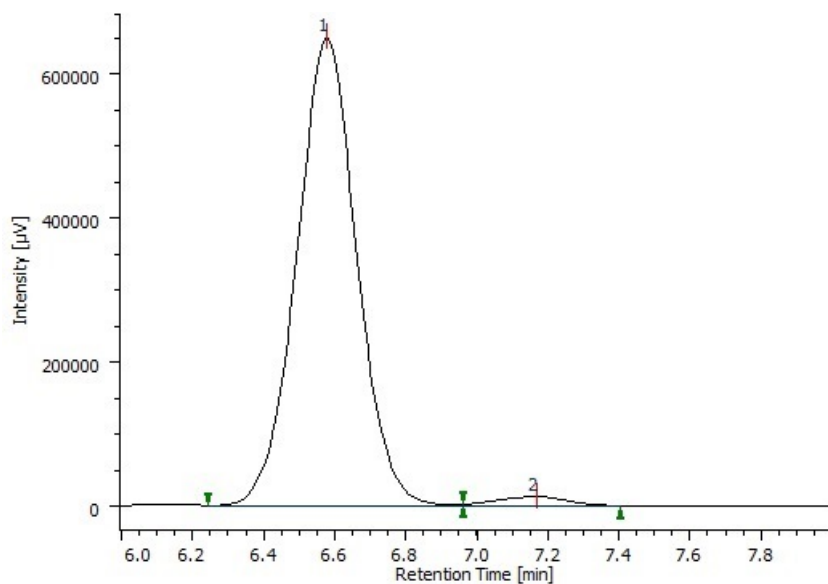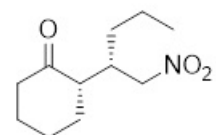

**4j** (96% ee)

| peak No. | tR (min) | Area    | High (µV) | Area (%) |
|----------|----------|---------|-----------|----------|
| 1        | 6.575    | 7585766 | 649886    | 97.834   |
| 2        | 7.167    | 167953  | 12553     | 2.166    |
| Total    |          | 7753719 | 662439    | 100.000  |



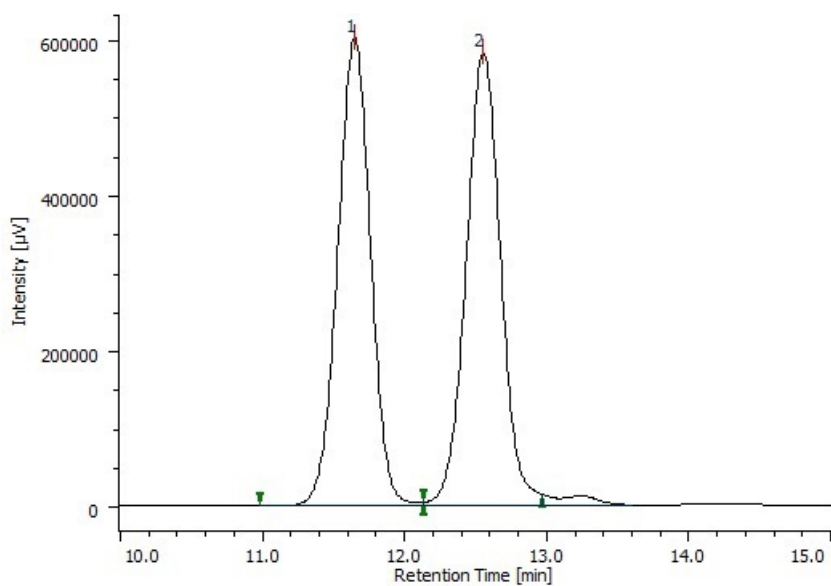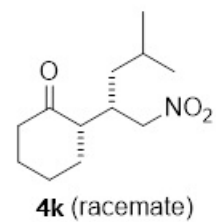

| peak No. | tR (min) | Area     | High (µV) | Area (%) |
|----------|----------|----------|-----------|----------|
| 1        | 11.642   | 9600346  | 599300    | 49.61    |
| 2        | 12.550   | 9751431  | 580322    | 50.39    |
| Total    |          | 19351777 | 1179622   | 100.000  |

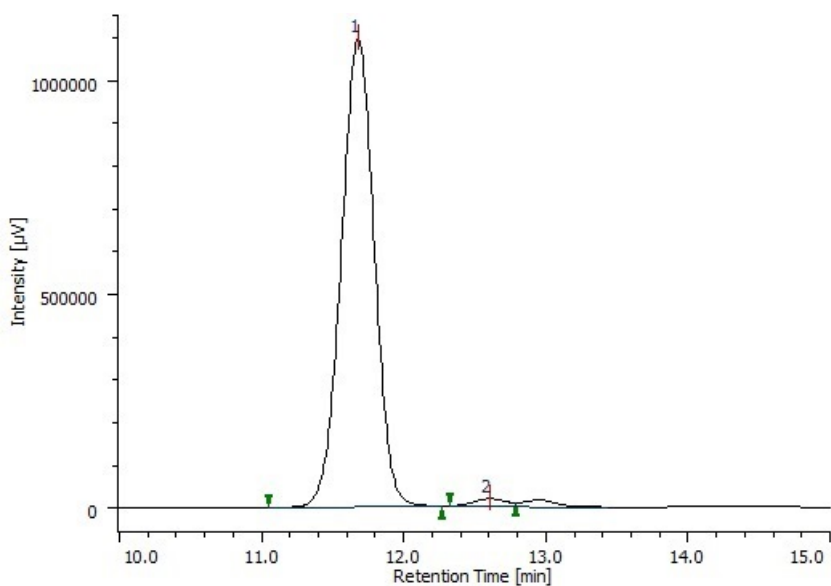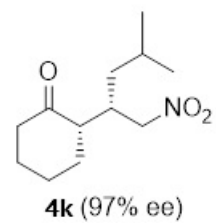

| peak No. | tR (min) | Area     | High (µV) | Area (%) |
|----------|----------|----------|-----------|----------|
| 1        | 11.675   | 17592960 | 1094361   | 98.466   |
| 2        | 12.600   | 274001   | 17388     | 1.534    |
| Total    |          | 17866961 | 1111749   | 100.000  |

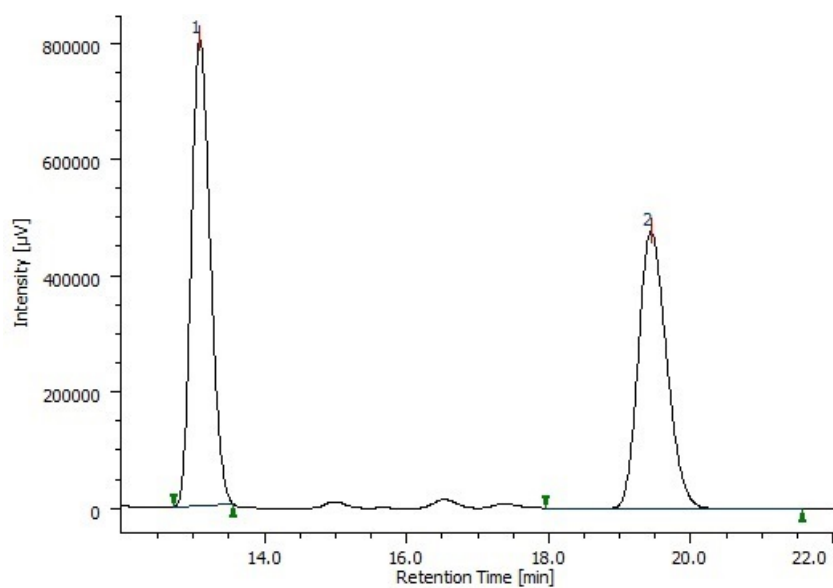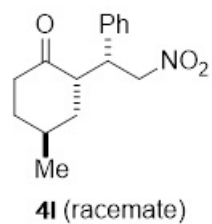

| peak No. | tR (min) | Area     | High ( $\mu\text{V}$ ) | Area (%) |
|----------|----------|----------|------------------------|----------|
| 1        | 13.092   | 14754003 | 800303                 | 52.972   |
| 2        | 19.425   | 13098681 | 474274                 | 47.028   |
| Total    |          | 27852684 | 1274577                | 100.000  |

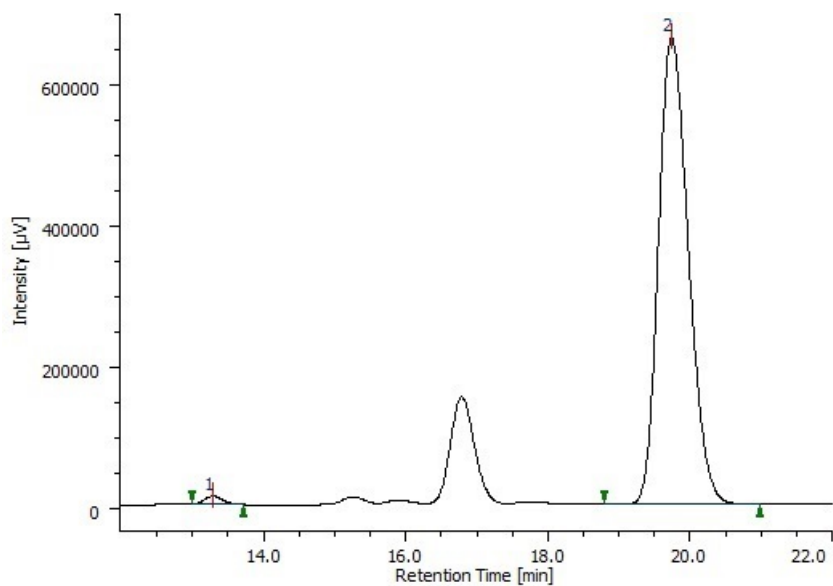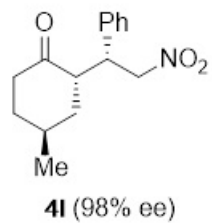

| peak No. | tR (min) | Area     | High ( $\mu\text{V}$ ) | Area (%) |
|----------|----------|----------|------------------------|----------|
| 1        | 13.283   | 209603   | 11526                  | 1.077    |
| 2        | 19.725   | 19244439 | 662182                 | 98.923   |
| Total    |          | 19454042 | 673708                 | 100.000  |

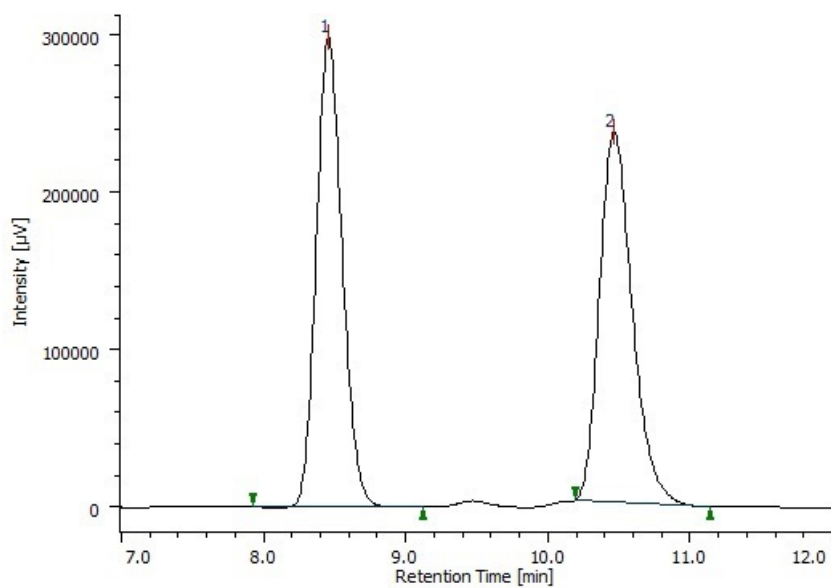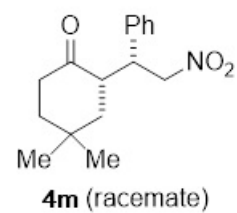

| peak No. | tR (min) | Area    | High (µV) | Area (%) |
|----------|----------|---------|-----------|----------|
| 1        | 8.450    | 3772725 | 297158    | 50.037   |
| 2        | 10.458   | 3767208 | 234497    | 49.963   |
| Total    |          | 7539933 | 531655    | 100.000  |

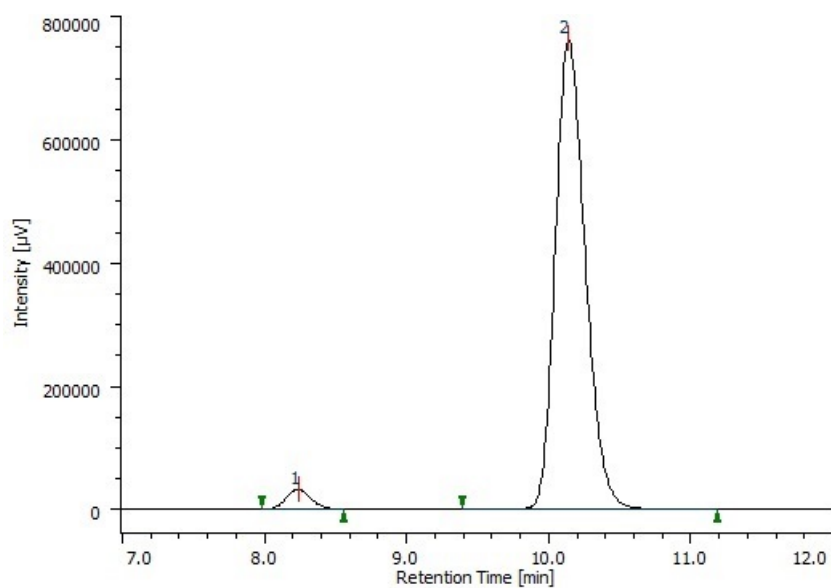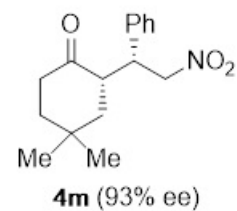

| peak No. | tR (min) | Area     | High (µV) | Area (%) |
|----------|----------|----------|-----------|----------|
| 1        | 8.233    | 388664   | 32316     | 3.371    |
| 2        | 10.133   | 11139833 | 761843    | 96.629   |
| Total    |          | 11528497 | 794159    | 100.000  |

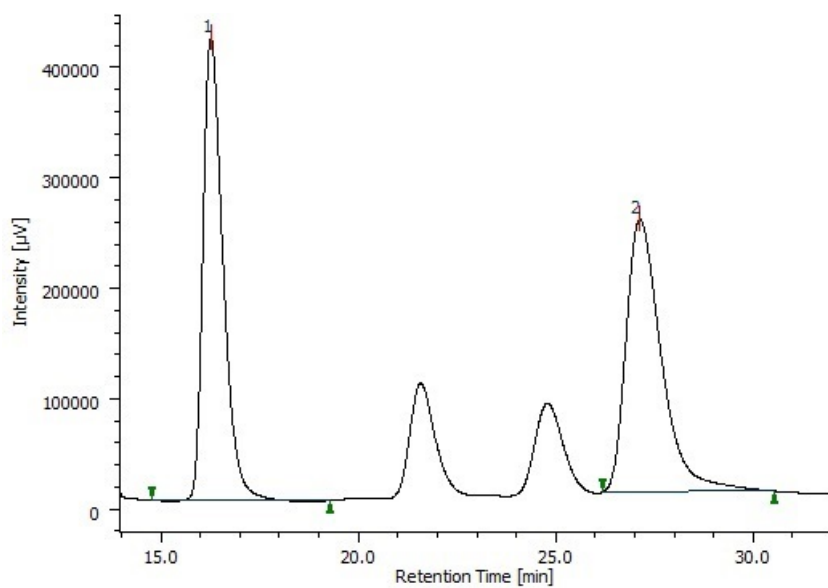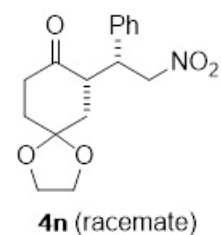

| peak No. | tR (min) | Area     | High ( $\mu\text{V}$ ) | Area (%) |
|----------|----------|----------|------------------------|----------|
| 1        | 16.258   | 14705190 | 418005                 | 48.85    |
| 2        | 27.108   | 15397743 | 246330                 | 51.15    |
| Total    |          | 30102933 | 664335                 | 100.000  |

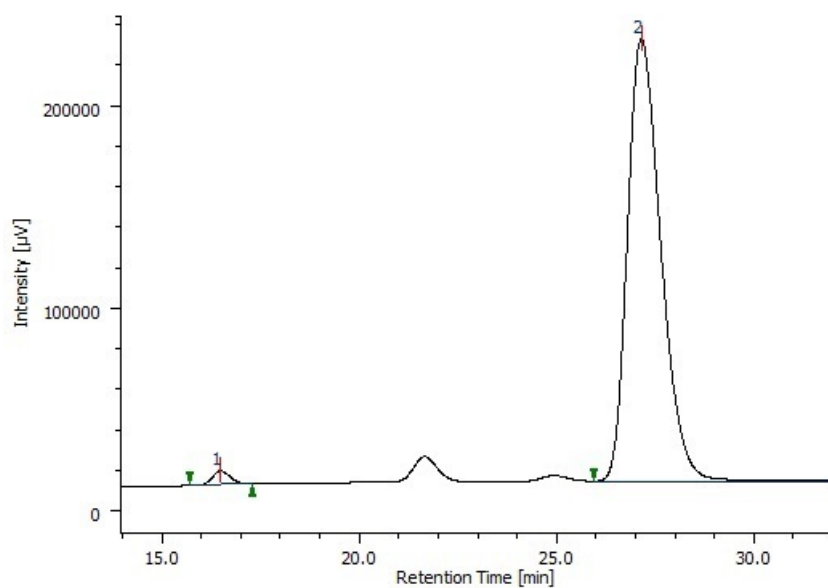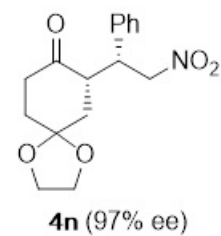

| peak No. | tR (min) | Area     | High ( $\mu\text{V}$ ) | Area (%) |
|----------|----------|----------|------------------------|----------|
| 1        | 16.483   | 217689   | 6821                   | 1.64     |
| 2        | 27.125   | 13056865 | 218090                 | 98.36    |
| Total    |          | 13274554 | 224911                 | 100.000  |

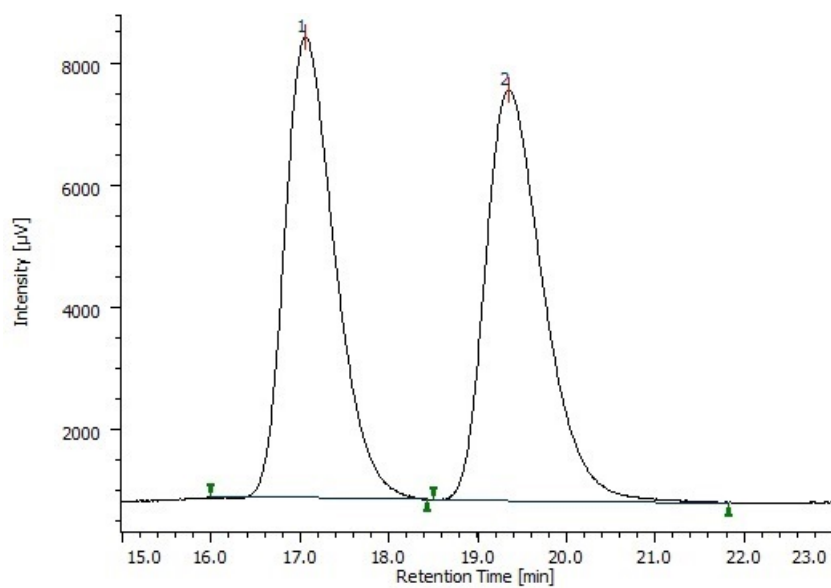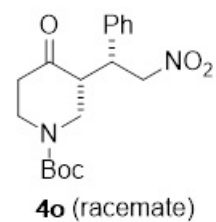

| peak No. | tR (min) | Area   | High ( $\mu\text{V}$ ) | Area (%) |
|----------|----------|--------|------------------------|----------|
| 1        | 17.058   | 294855 | 7510                   | 49.303   |
| 2        | 19.342   | 303196 | 6692                   | 50.697   |
| Total    |          | 598051 | 14202                  | 100.000  |

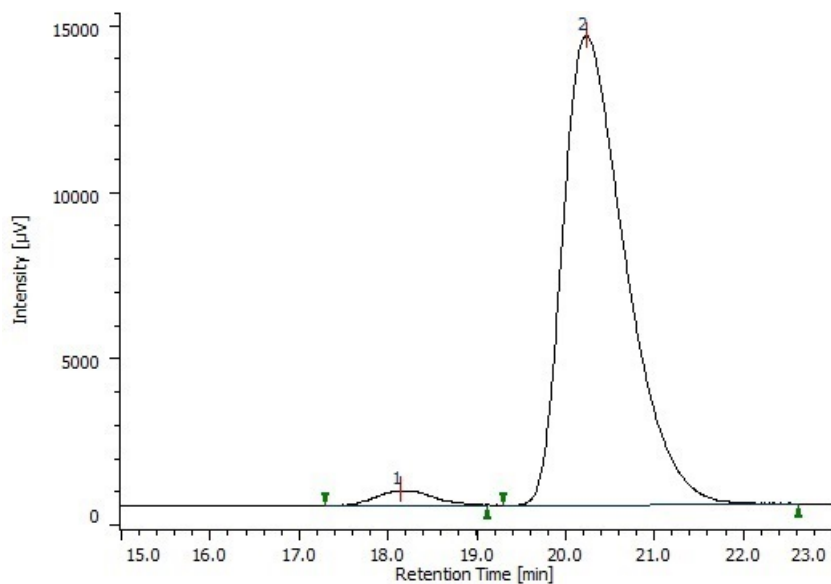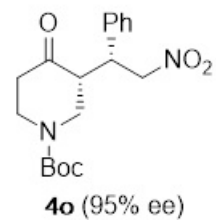

| peak No. | tR (min) | Area   | High ( $\mu\text{V}$ ) | Area (%) |
|----------|----------|--------|------------------------|----------|
| 1        | 17.700   | 11343  | 264                    | 2.555    |
| 2        | 19.683   | 432609 | 9292                   | 97.445   |
| Total    |          | 443952 | 9556                   | 100.000  |

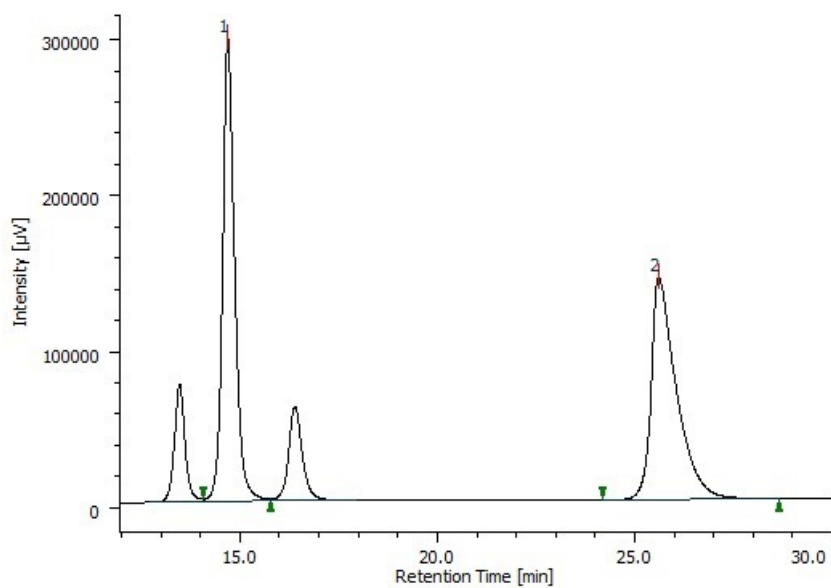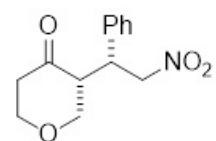

**4p** (racemate)

| peak No. | tR (min) | Area     | High ( $\mu\text{V}$ ) | Area (%) |
|----------|----------|----------|------------------------|----------|
| 1        | 14.683   | 6289111  | 296387                 | 50.02    |
| 2        | 25.583   | 6284054  | 142222                 | 49.98    |
| Total    |          | 12573165 | 438609                 | 100.000  |

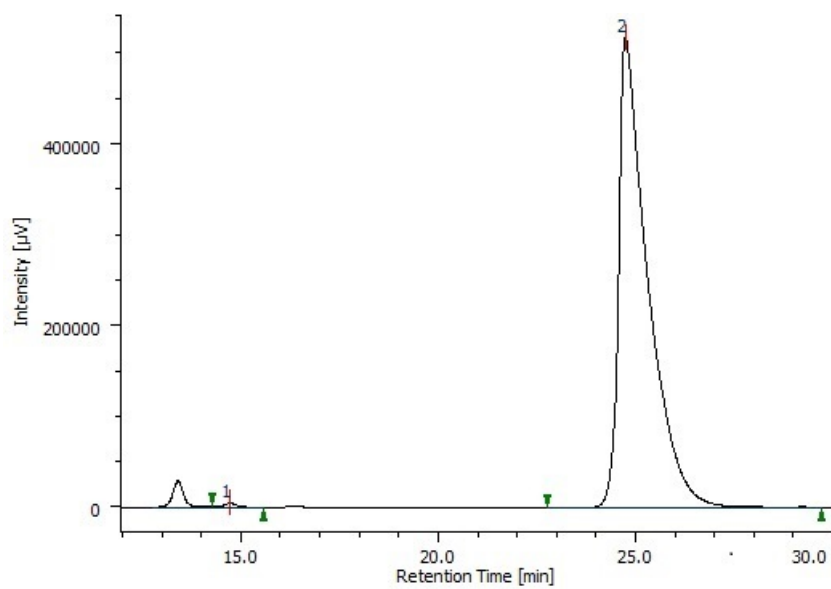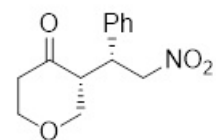

**4p** (99% ee)

| peak No. | tR (min) | Area     | High ( $\mu\text{V}$ ) | Area (%) |
|----------|----------|----------|------------------------|----------|
| 1        | 14.733   | 94438    | 4429                   | 0.356    |
| 2        | 24.717   | 26404752 | 516202                 | 99.644   |
| Total    |          | 26499190 | 520631                 | 100.000  |

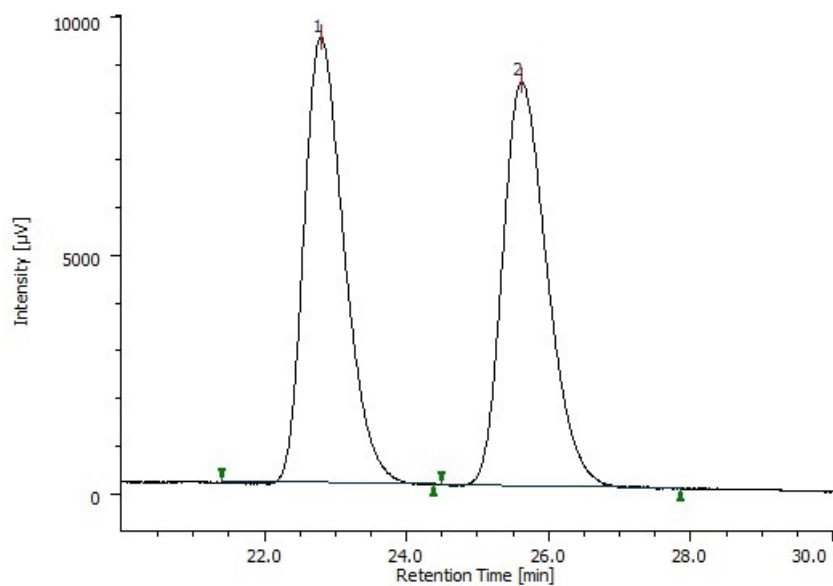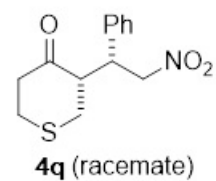

| peak No. | tR (min) | Area   | High ( $\mu\text{V}$ ) | Area (%) |
|----------|----------|--------|------------------------|----------|
| 1        | 22.792   | 364561 | 9310                   | 49.89    |
| 2        | 25.608   | 366167 | 8450                   | 50.11    |
| Total    |          | 730728 | 17760                  | 100.000  |

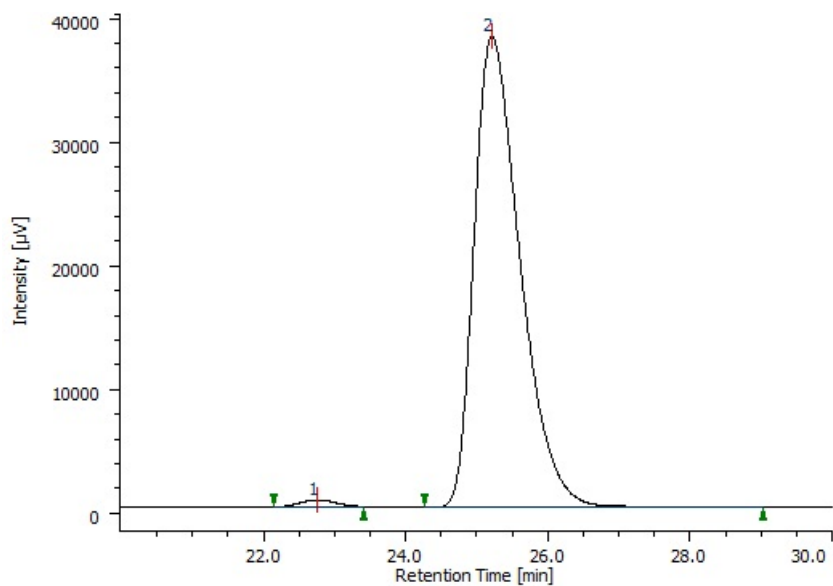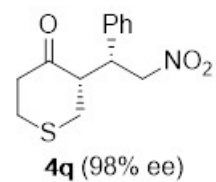

| peak No. | tR (min) | Area    | High ( $\mu\text{V}$ ) | Area (%) |
|----------|----------|---------|------------------------|----------|
| 1        | 22.742   | 19494   | 559                    | 1.13     |
| 2        | 25.208   | 1705223 | 37969                  | 98.87    |
| Total    |          | 1724717 | 38528                  | 100.000  |

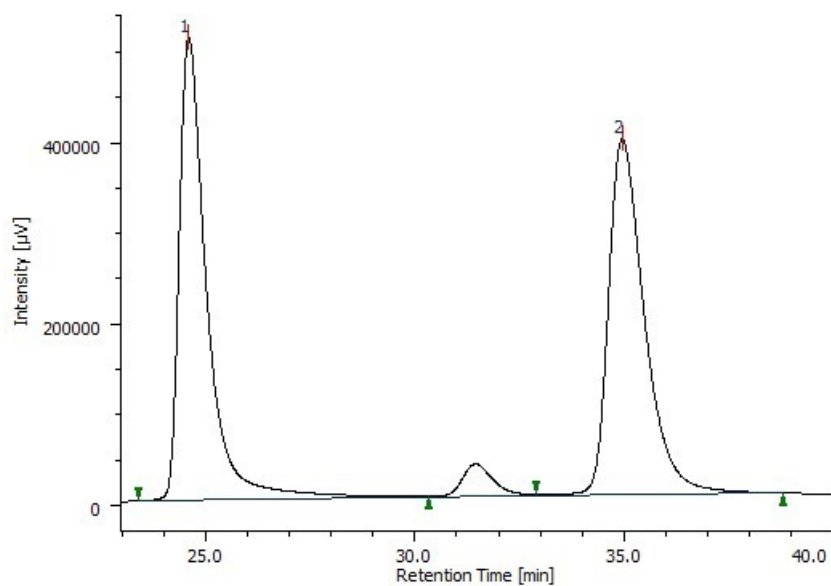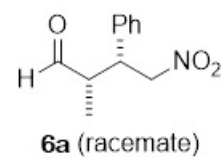

| peak No. | tR (min) | Area     | High ( $\mu\text{V}$ ) | Area (%) |
|----------|----------|----------|------------------------|----------|
| 1        | 24.583   | 24003197 | 509747                 | 49.431   |
| 2        | 34.942   | 24555702 | 394002                 | 50.569   |
| Total    |          | 48558899 | 903749                 | 100.000  |

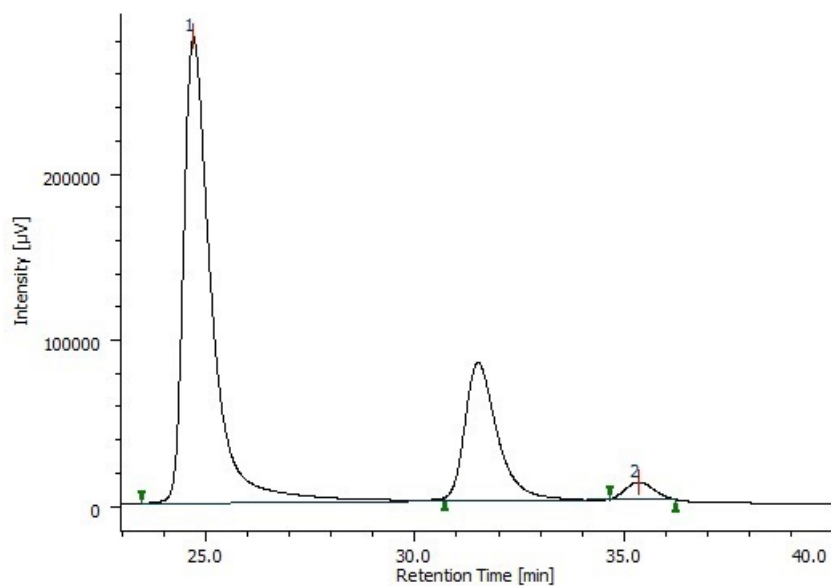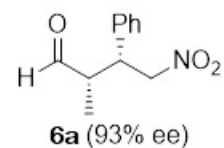

| peak No. | tR (min) | Area     | High ( $\mu\text{V}$ ) | Area (%) |
|----------|----------|----------|------------------------|----------|
| 1        | 24.700   | 13117730 | 280108                 | 96.232   |
| 2        | 35.325   | 513576   | 10617                  | 3.768    |
| Total    |          | 13631306 | 290725                 | 100.000  |



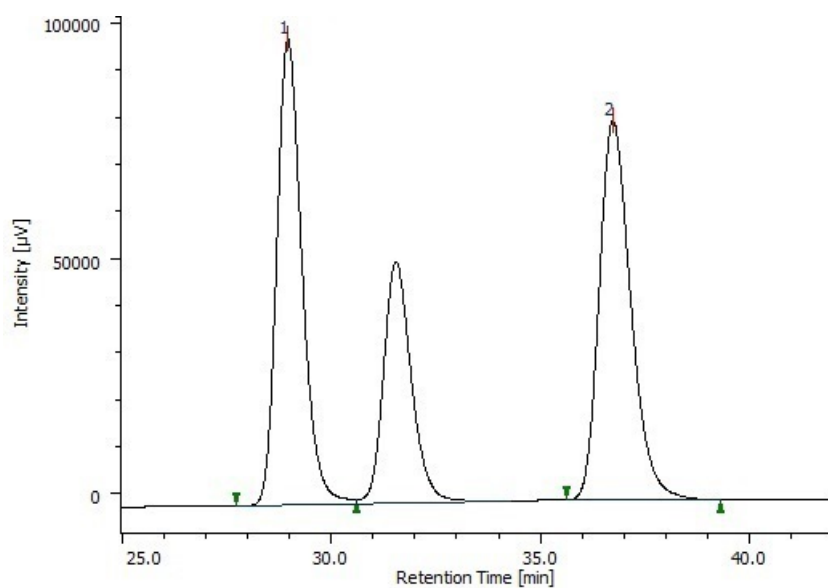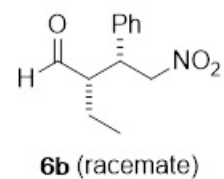

| peak No. | tR (min) | Area    | High ( $\mu\text{V}$ ) | Area (%) |
|----------|----------|---------|------------------------|----------|
| 1        | 28.950   | 4143022 | 98976                  | 49.564   |
| 2        | 36.717   | 4215994 | 80389                  | 50.436   |
| Total    |          | 8359016 | 179365                 | 100.000  |

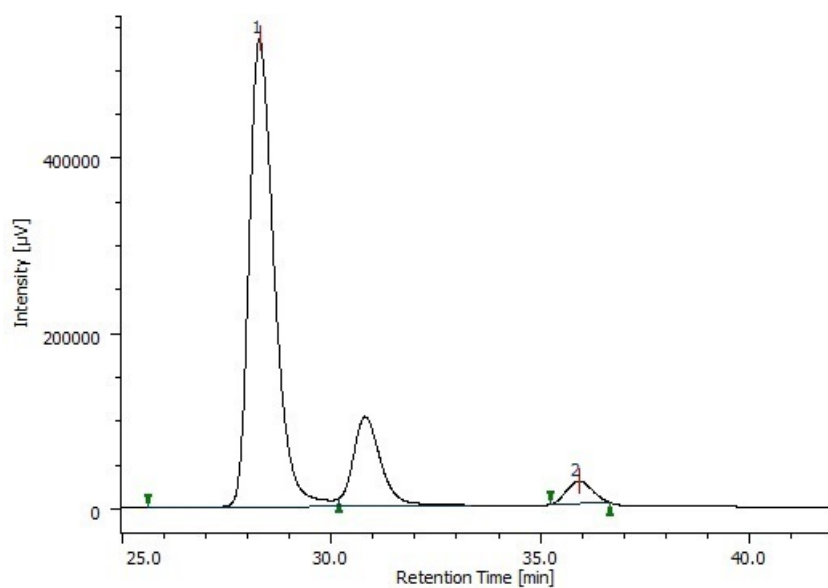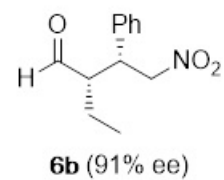

| peak No. | tR (min) | Area     | High ( $\mu\text{V}$ ) | Area (%) |
|----------|----------|----------|------------------------|----------|
| 1        | 28.275   | 22115533 | 532346                 | 95.372   |
| 2        | 35.900   | 1073247  | 25200                  | 4.628    |
| Total    |          | 23188780 | 557546                 | 100.000  |

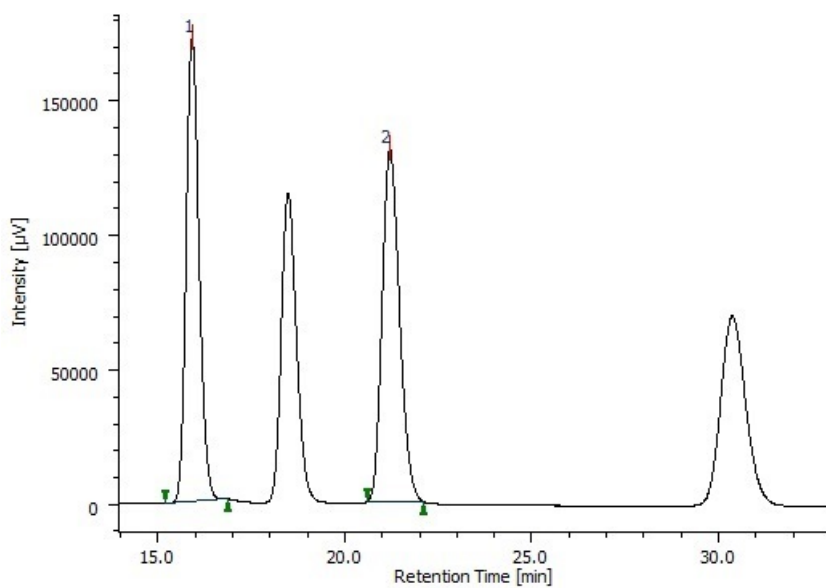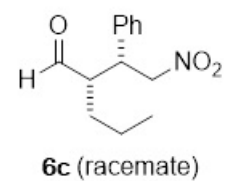

| peak No. | tR (min) | Area    | High (µV) | Area (%) |
|----------|----------|---------|-----------|----------|
| 1        | 15.917   | 4136134 | 171818    | 49.657   |
| 2        | 21.192   | 4193319 | 130416    | 50.343   |
| Total    |          | 8329453 | 302234    | 100.000  |

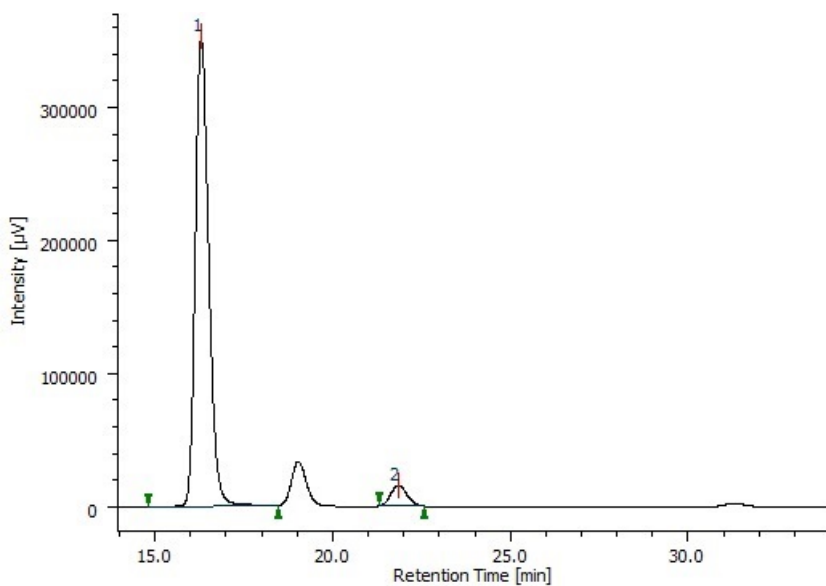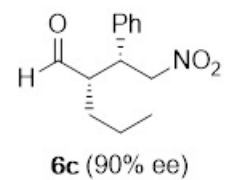

| peak No. | tR (min) | Area    | High (µV) | Area (%) |
|----------|----------|---------|-----------|----------|
| 1        | 16.300   | 9185184 | 351761    | 94.89    |
| 2        | 21.833   | 494611  | 15550     | 5.11     |
| Total    |          | 9679795 | 367311    | 100.000  |

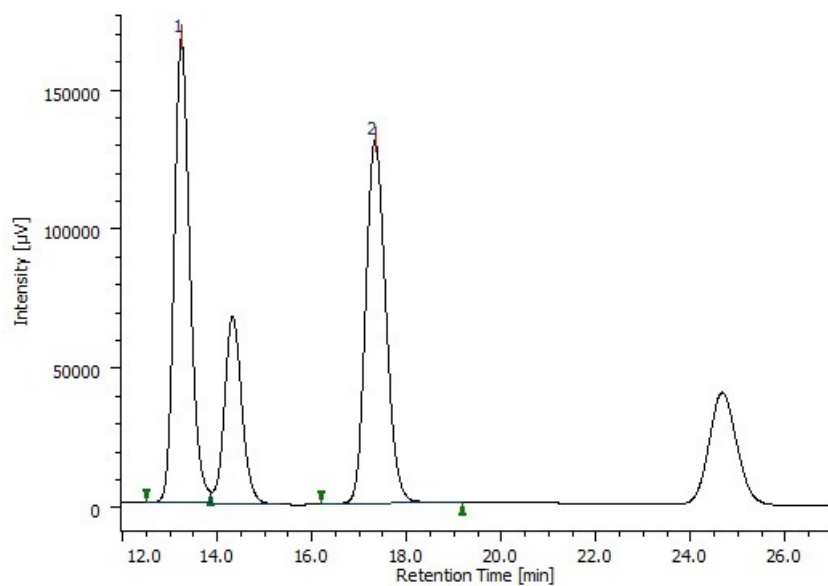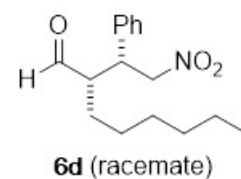

| peak No. | tR (min) | Area    | High (µV) | Area (%) |
|----------|----------|---------|-----------|----------|
| 1        | 13.242   | 3870300 | 166832    | 50.345   |
| 2        | 17.325   | 3817220 | 130098    | 49.655   |
| Total    |          | 7687520 | 296930    | 100.000  |

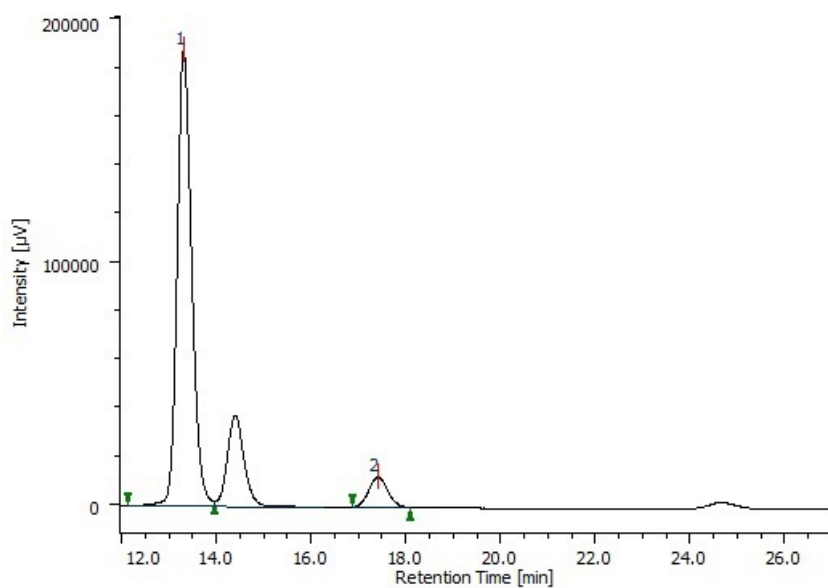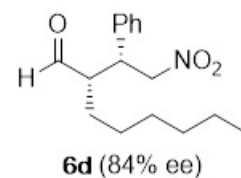

| peak No. | tR (min) | Area    | High (µV) | Area (%) |
|----------|----------|---------|-----------|----------|
| 1        | 13.317   | 4023590 | 186883    | 92.161   |
| 2        | 17.400   | 342232  | 12329     | 7.839    |
| Total    |          | 4365822 | 199212    | 100.000  |

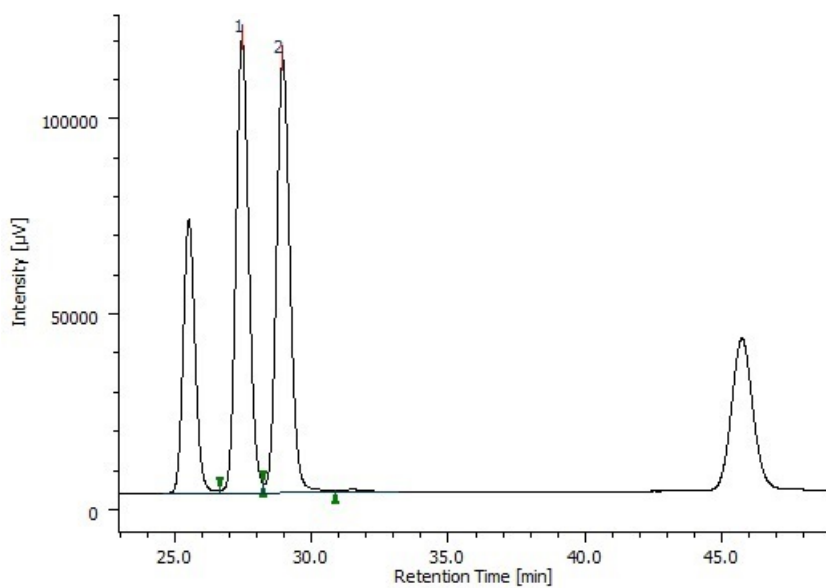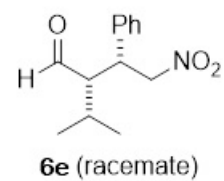

| peak No. | tR (min) | Area    | High (µV) | Area (%) |
|----------|----------|---------|-----------|----------|
| 1        | 27.442   | 3773203 | 116206    | 49.768   |
| 2        | 28.933   | 3808450 | 110727    | 50.232   |
| Total    |          | 7581653 | 226933    | 100.000  |

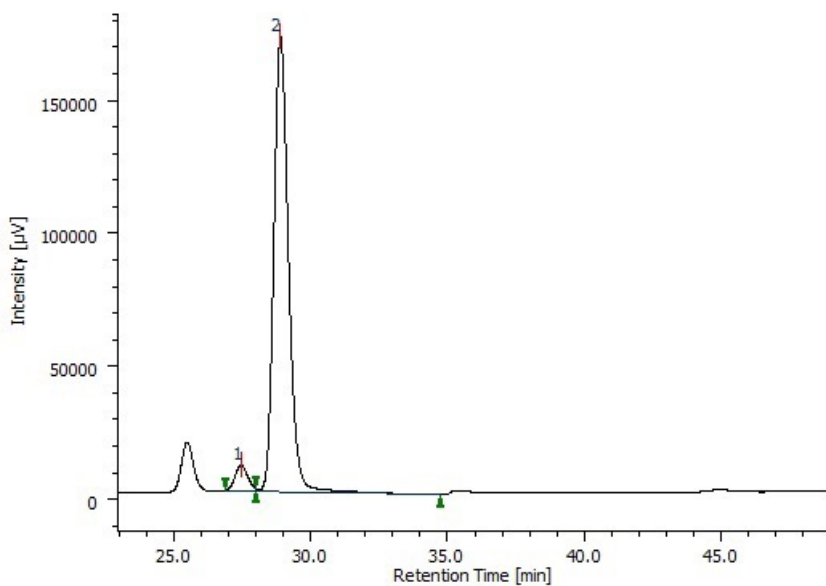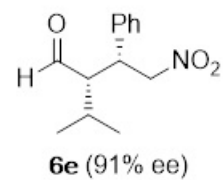

| peak No. | tR (min) | Area    | High (µV) | Area (%) |
|----------|----------|---------|-----------|----------|
| 1        | 27.433   | 313933  | 9668      | 4.685    |
| 2        | 28.883   | 6386675 | 170749    | 95.315   |
| Total    |          | 6700608 | 180417    | 100.000  |

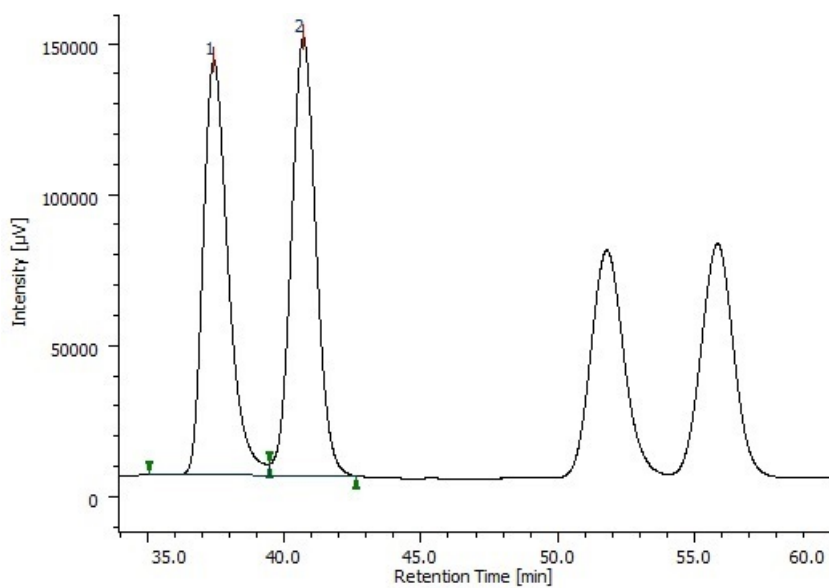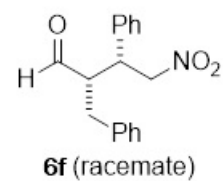

| peak No. | tR (min) | Area     | High (µV) | Area (%) |
|----------|----------|----------|-----------|----------|
| 1        | 37.417   | 8660005  | 136902    | 49.039   |
| 2        | 40.683   | 8999556  | 144583    | 50.961   |
| Total    |          | 17659561 | 281485    | 100.000  |

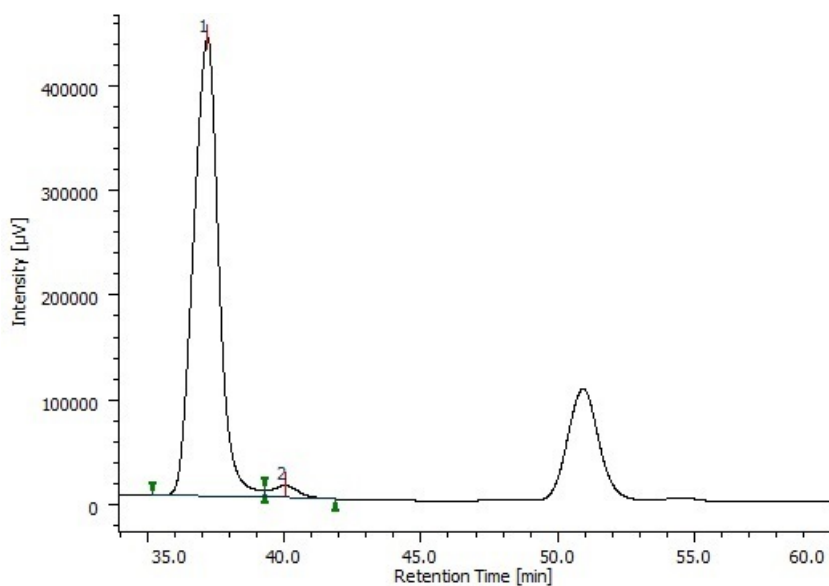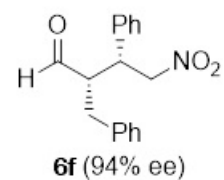

| peak No. | tR (min) | Area     | High (µV) | Area (%) |
|----------|----------|----------|-----------|----------|
| 1        | 37.175   | 28014434 | 436233    | 97.226   |
| 2        | 40.008   | 799424   | 11715     | 2.774    |
| Total    |          | 28813858 | 447948    | 100.000  |

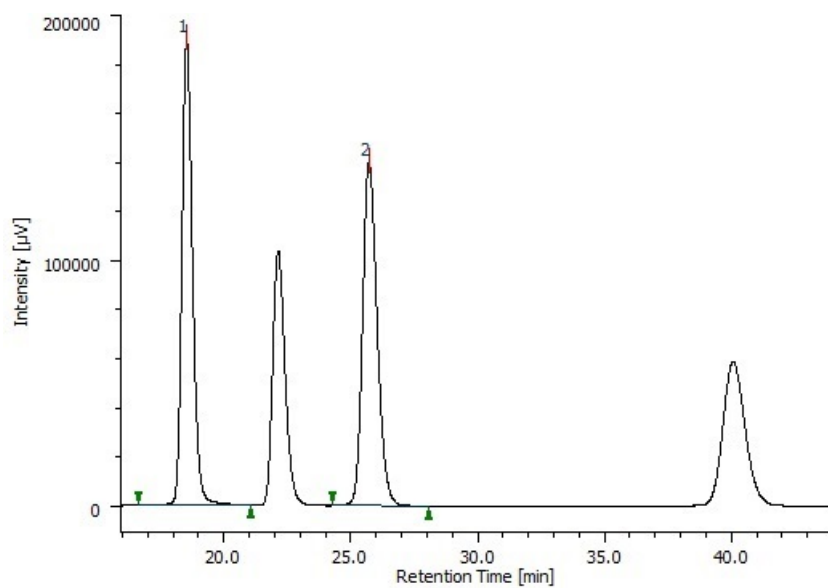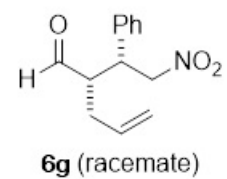

| peak No. | tR (min) | Area     | High (µV) | Area (%) |
|----------|----------|----------|-----------|----------|
| 1        | 18.525   | 5514121  | 190306    | 49.684   |
| 2        | 25.700   | 5584347  | 140059    | 50.316   |
| Total    |          | 11098468 | 330365    | 100.000  |

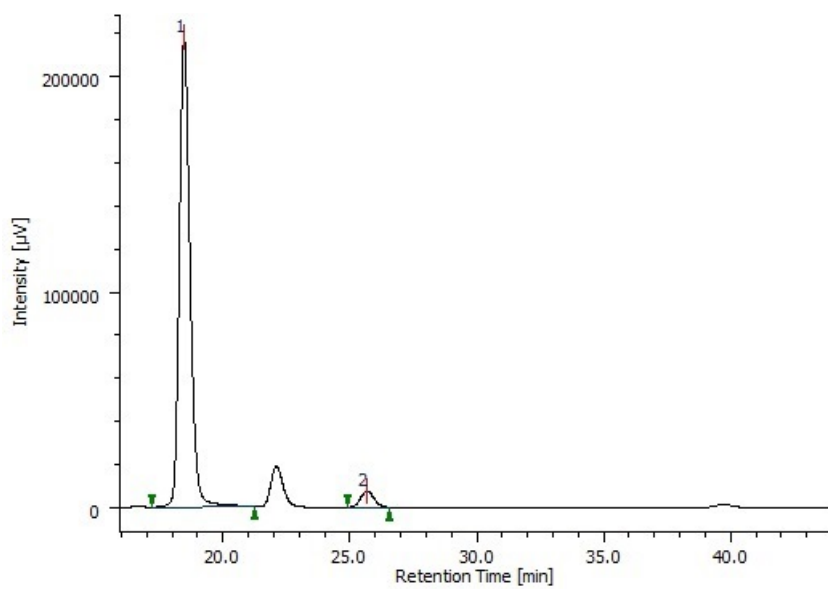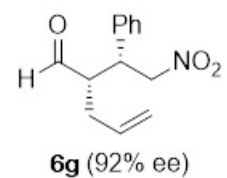

| peak No. | tR (min) | Area    | High (µV) | Area (%) |
|----------|----------|---------|-----------|----------|
| 1        | 18.467   | 6352421 | 216521    | 95.823   |
| 2        | 25.658   | 276898  | 7430      | 4.177    |
| Total    |          | 6629319 | 223951    | 100.000  |

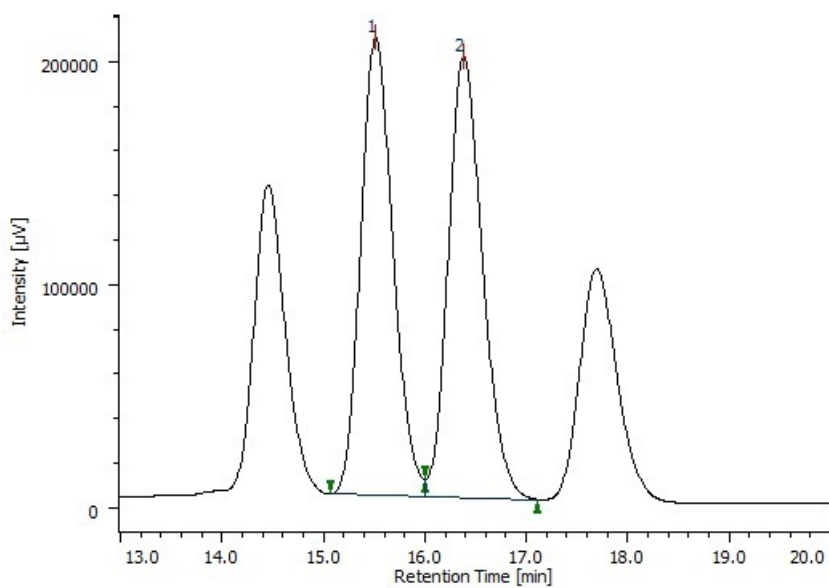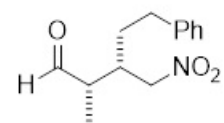

**6h (racemate)**

| peak No. | tR (min) | Area    | High ( $\mu\text{V}$ ) | Area (%) |
|----------|----------|---------|------------------------|----------|
| 1        | 15.508   | 4528294 | 204813                 | 49.546   |
| 2        | 16.375   | 4611292 | 197166                 | 50.454   |
| Total    |          | 9139586 | 401979                 | 100.000  |

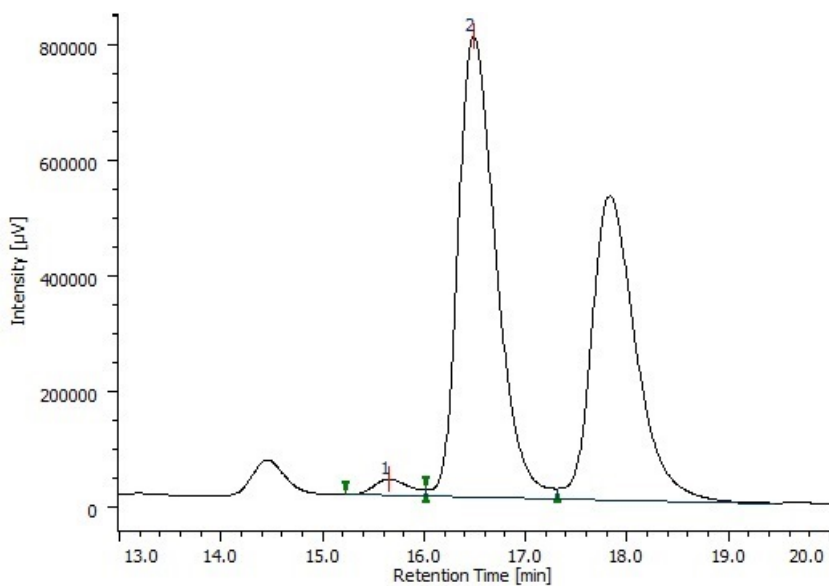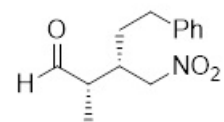

**6h (94% ee)**

| peak No. | tR (min) | Area     | High ( $\mu\text{V}$ ) | Area (%) |
|----------|----------|----------|------------------------|----------|
| 1        | 15.650   | 683756   | 28067                  | 3.219    |
| 2        | 16.483   | 20558734 | 795413                 | 96.781   |
| Total    |          | 21242490 | 823480                 | 100.000  |

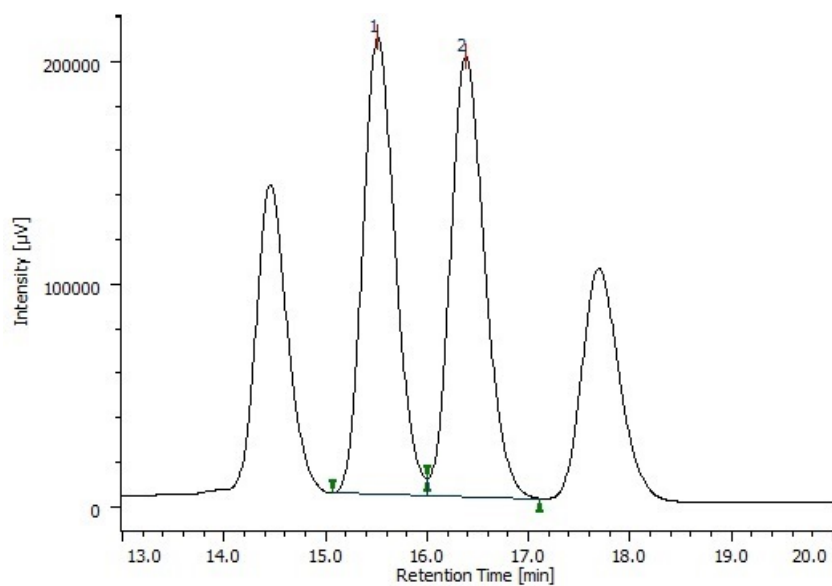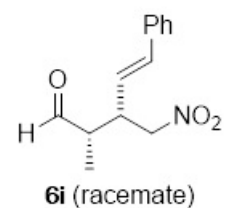

| peak No. | tR (min) | Area    | High ( $\mu\text{V}$ ) | Area (%) |
|----------|----------|---------|------------------------|----------|
| 1        | 15.508   | 4528294 | 204813                 | 49.546   |
| 2        | 16.375   | 4611292 | 197166                 | 50.454   |
| Total    |          | 9139586 | 401979                 | 100.000  |

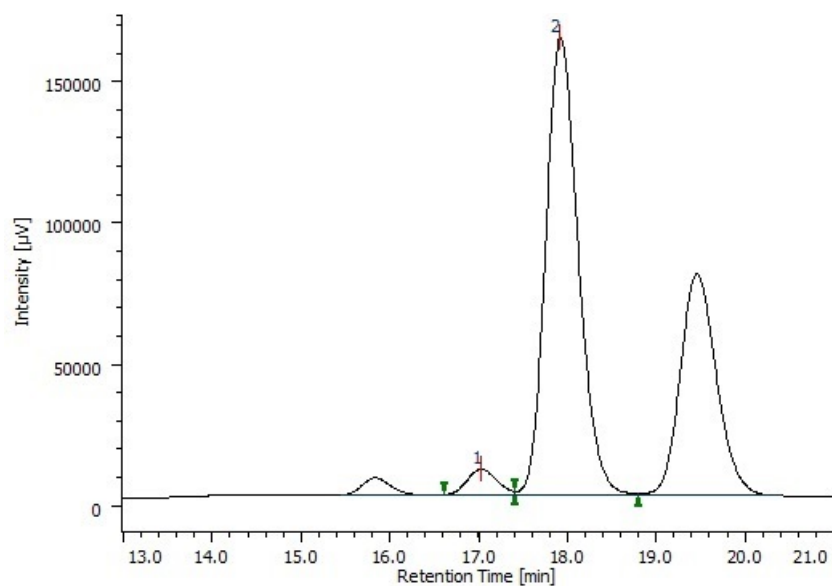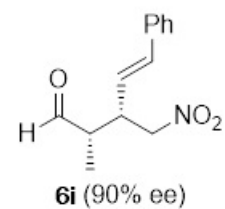

| peak No. | tR (min) | Area    | High ( $\mu\text{V}$ ) | Area (%) |
|----------|----------|---------|------------------------|----------|
| 1        | 17.025   | 217403  | 9195                   | 5.032    |
| 2        | 17.908   | 4103197 | 161442                 | 94.968   |
| Total    |          | 4320600 | 170637                 | 100.000  |



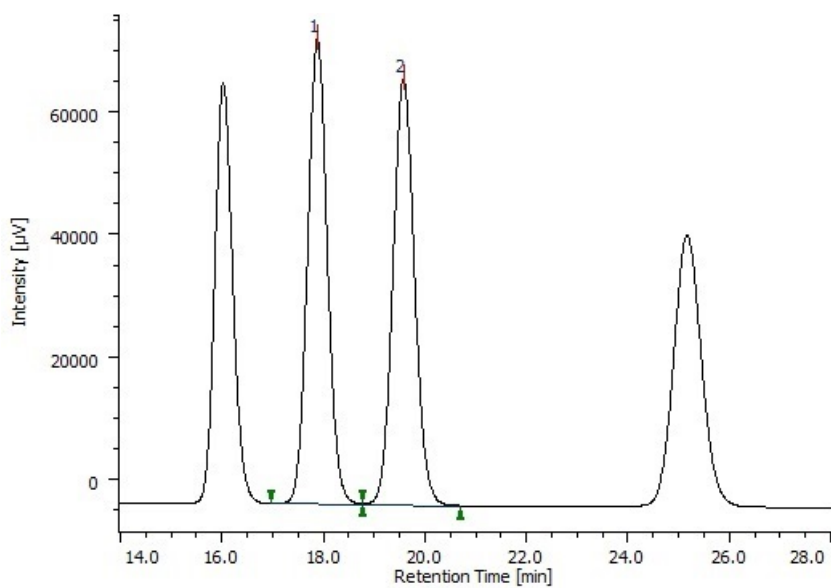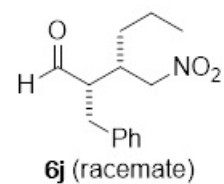

| peak No. | tR (min) | Area    | High (µV) | Area (%) |
|----------|----------|---------|-----------|----------|
| 1        | 17.875   | 2046686 | 75897     | 49.987   |
| 2        | 19.567   | 2047782 | 69341     | 50.013   |
| Total    |          | 4094468 | 145238    | 100.000  |

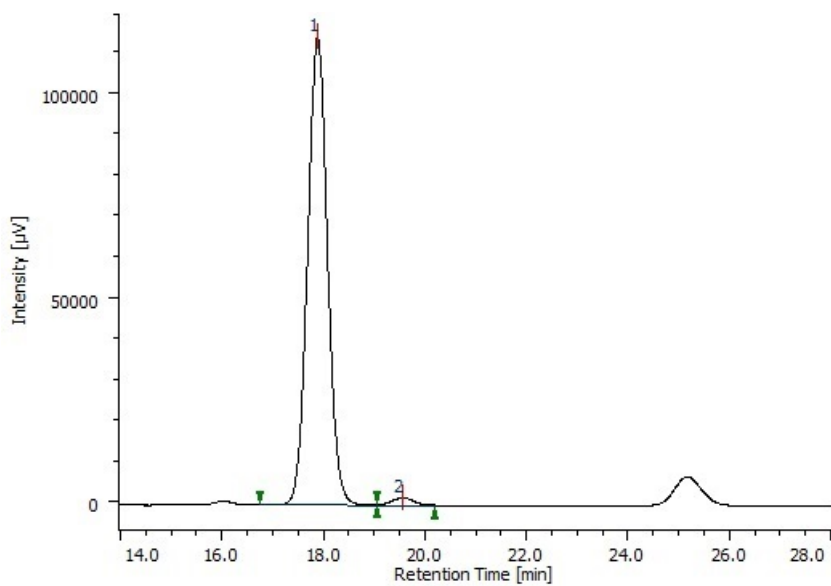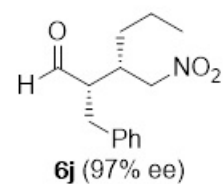

| peak No. | tR (min) | Area    | High (µV) | Area (%) |
|----------|----------|---------|-----------|----------|
| 1        | 17.883   | 3101071 | 114116    | 98.29    |
| 2        | 19.558   | 53945   | 1842      | 1.71     |
| Total    |          | 3155016 | 115958    | 100.000  |

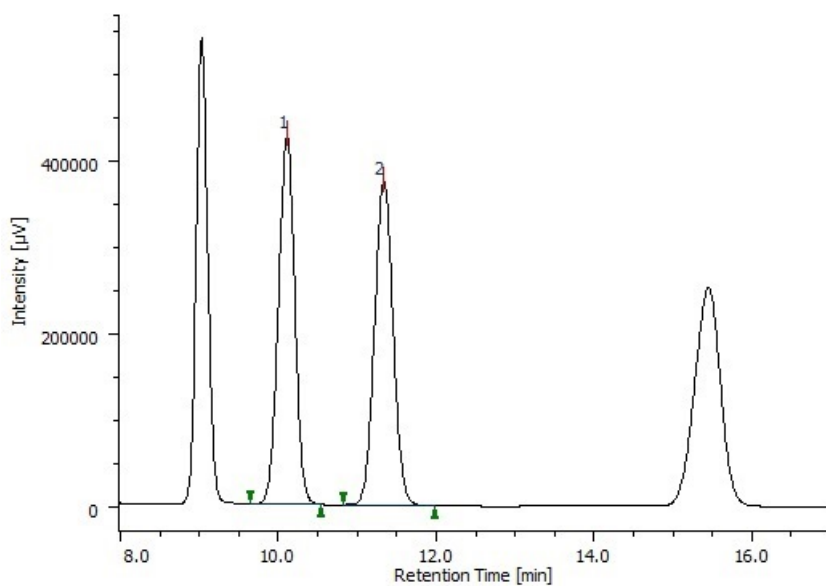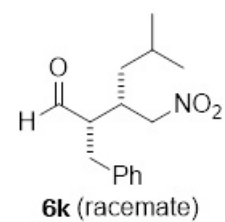

| peak No. | tR (min) | Area     | High (µV) | Area (%) |
|----------|----------|----------|-----------|----------|
| 1        | 10.108   | 6110462  | 426286    | 49.937   |
| 2        | 11.333   | 6125942  | 374780    | 50.063   |
| Total    |          | 12236404 | 801066    | 100.000  |

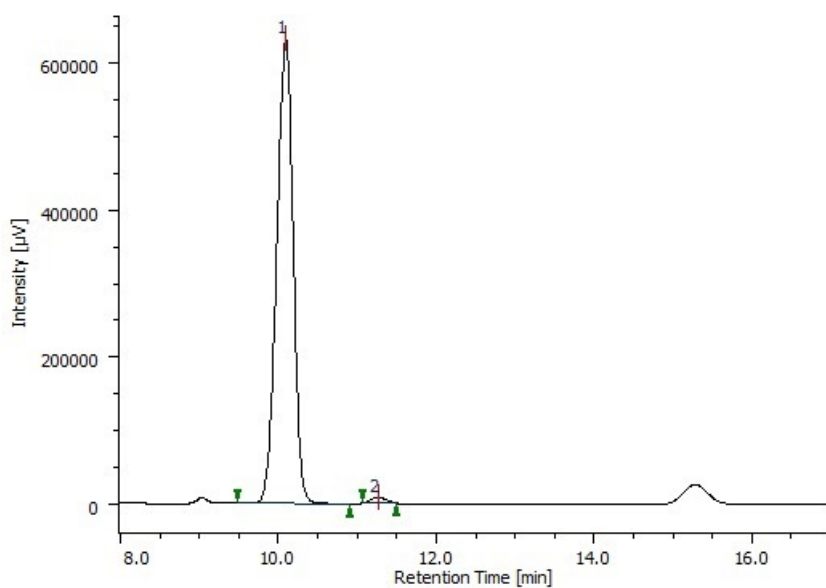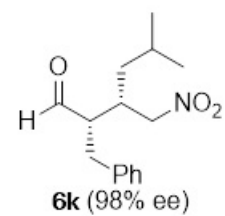

| peak No. | tR (min) | Area    | High (µV) | Area (%) |
|----------|----------|---------|-----------|----------|
| 1        | 10.092   | 9097616 | 630142    | 98.889   |
| 2        | 11.267   | 102190  | 7715      | 1.111    |
| Total    |          | 9199806 | 637857    | 100.000  |

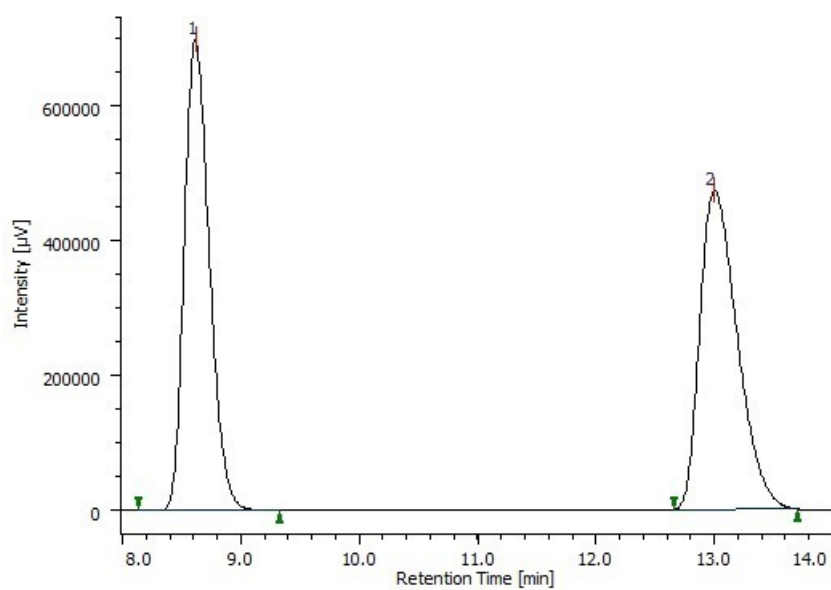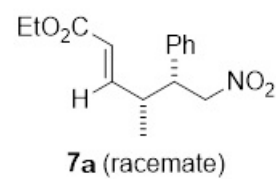

| peak No. | tR (min) | Area     | High ( $\mu\text{V}$ ) | Area (%) |
|----------|----------|----------|------------------------|----------|
| 1        | 8.617    | 10165899 | 695089                 | 49.581   |
| 2        | 12.992   | 10337797 | 471295                 | 50.419   |
| Total    |          | 20503696 | 1166384                | 100.000  |

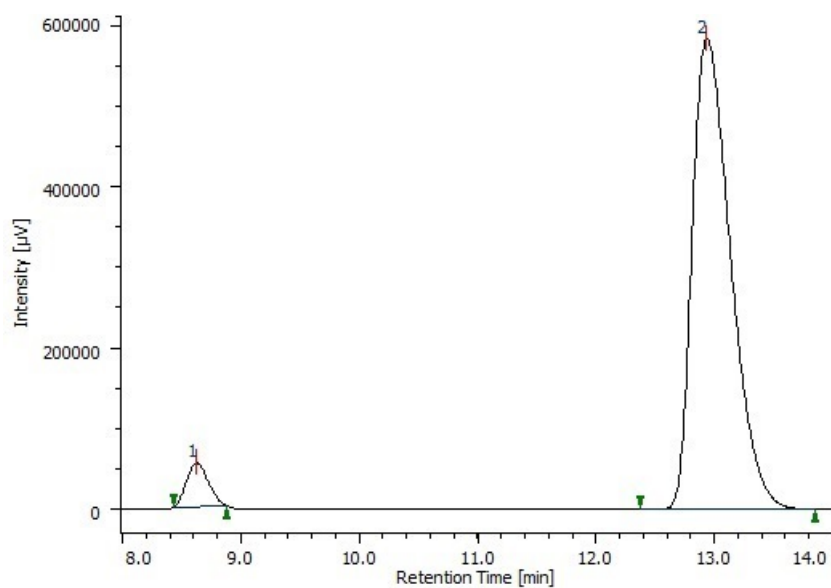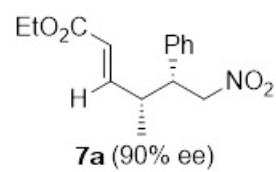

| peak No. | tR (min) | Area     | High ( $\mu\text{V}$ ) | Area (%) |
|----------|----------|----------|------------------------|----------|
| 1        | 8.625    | 691345   | 54333                  | 5.015    |
| 2        | 12.925   | 13095319 | 583066                 | 94.985   |
| Total    |          | 13786664 | 637399                 | 100.000  |

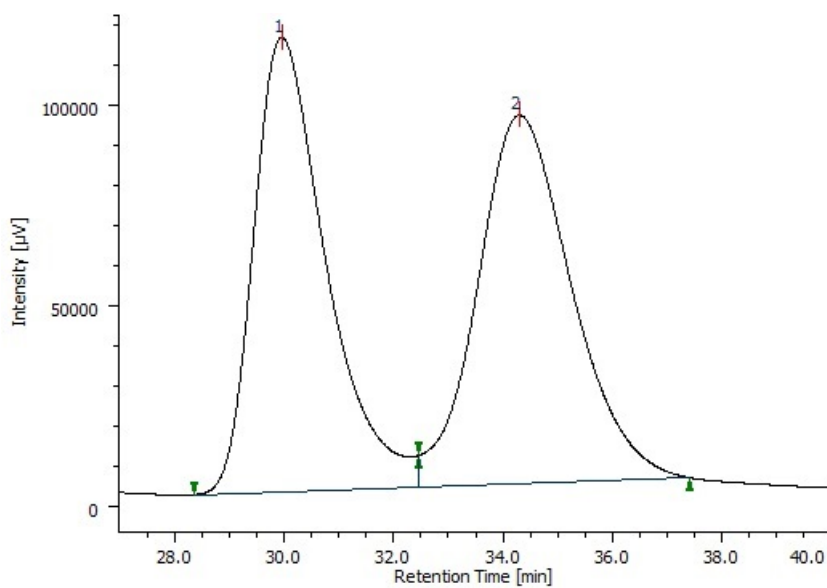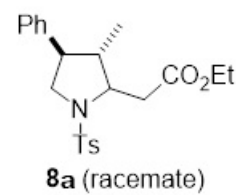

| peak No. | tR (min) | Area     | High (µV) | Area (%) |
|----------|----------|----------|-----------|----------|
| 1        | 29.950   | 10378914 | 113126    | 48.726   |
| 2        | 34.283   | 10921558 | 91714     | 51.274   |
| Total    |          | 21300472 | 204840    | 100.000  |

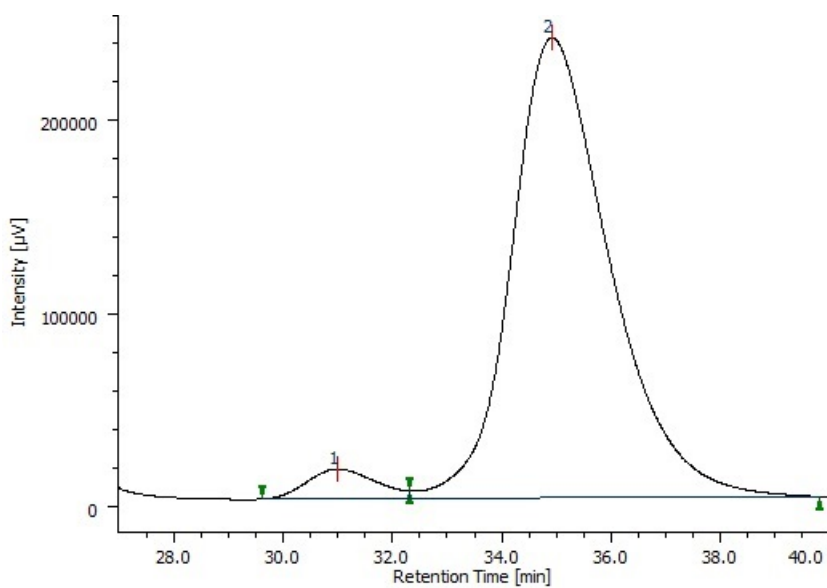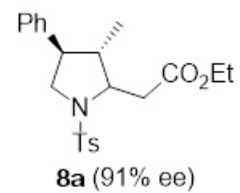

| peak No. | tR (min) | Area     | High (µV) | Area (%) |
|----------|----------|----------|-----------|----------|
| 1        | 30.992   | 1325010  | 15207     | 4.283    |
| 2        | 34.908   | 29612181 | 236939    | 95.717   |
| Total    |          | 30937191 | 252146    | 100.000  |
